# Supplementary material for: True Lies: Using Proteomics to Assess the Accuracy of Transcriptome-Based Venomics in Centipedes Uncovers False Positives and Reveals Startling Intraspecific Variation in Scolopendra subspinipes
Source: MDPI journal article supplement (doi:10.3390/toxins10030096), 2018-02-28

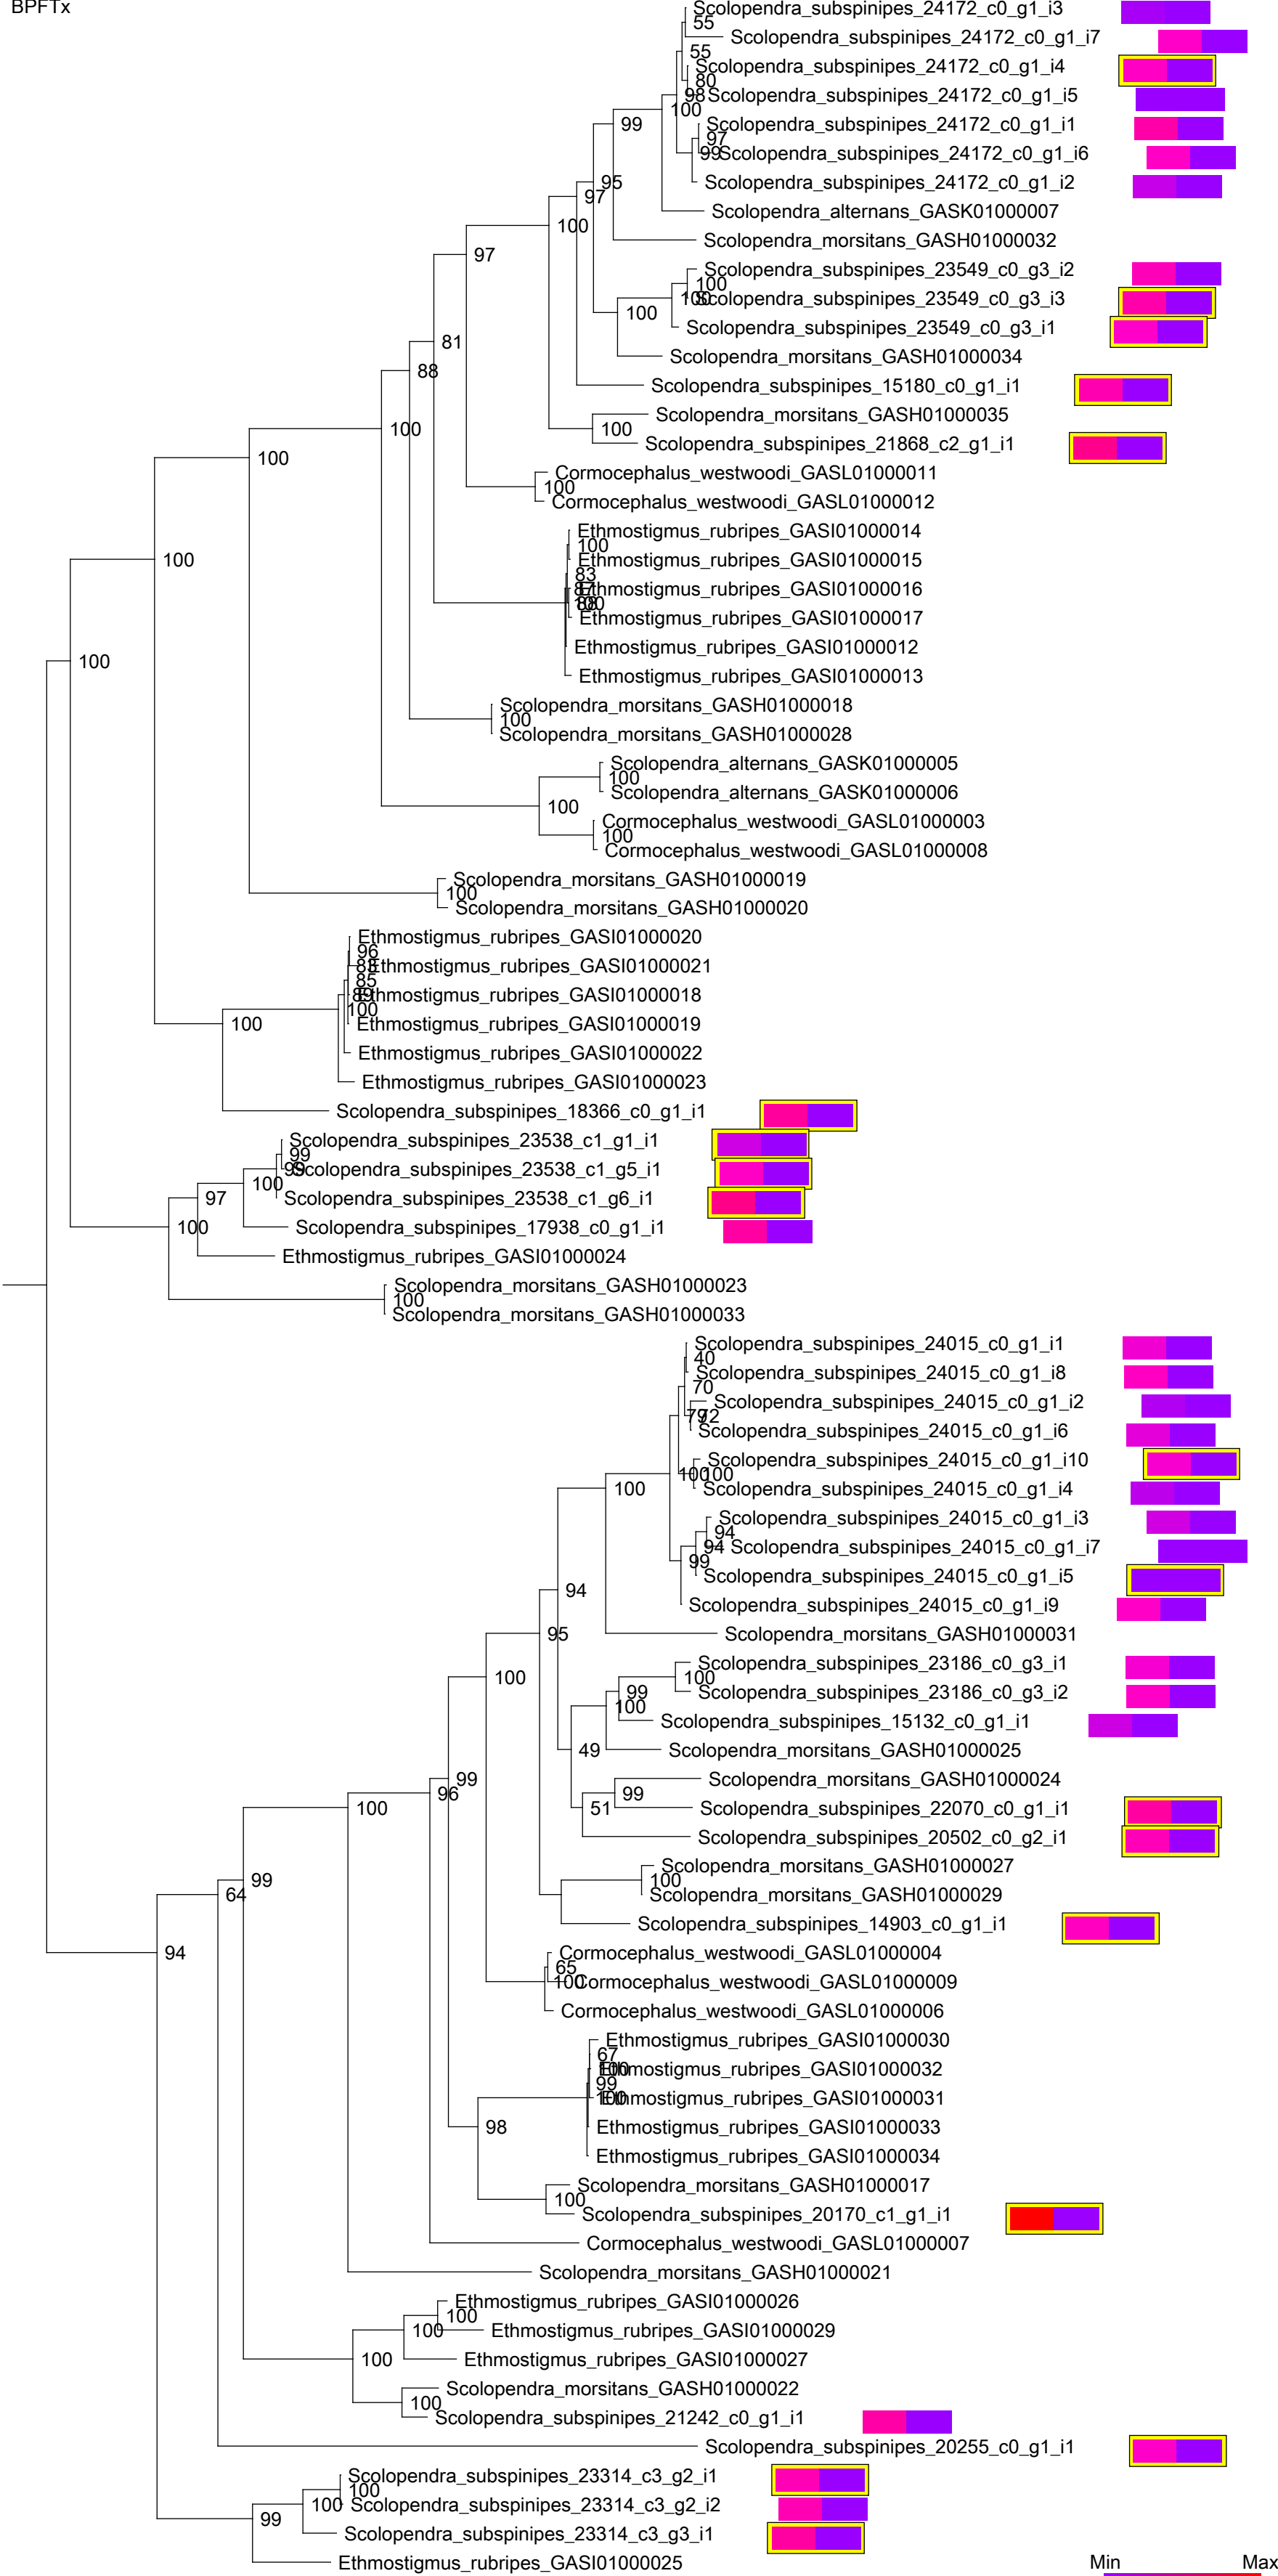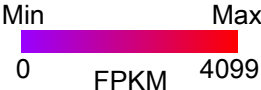

CAP

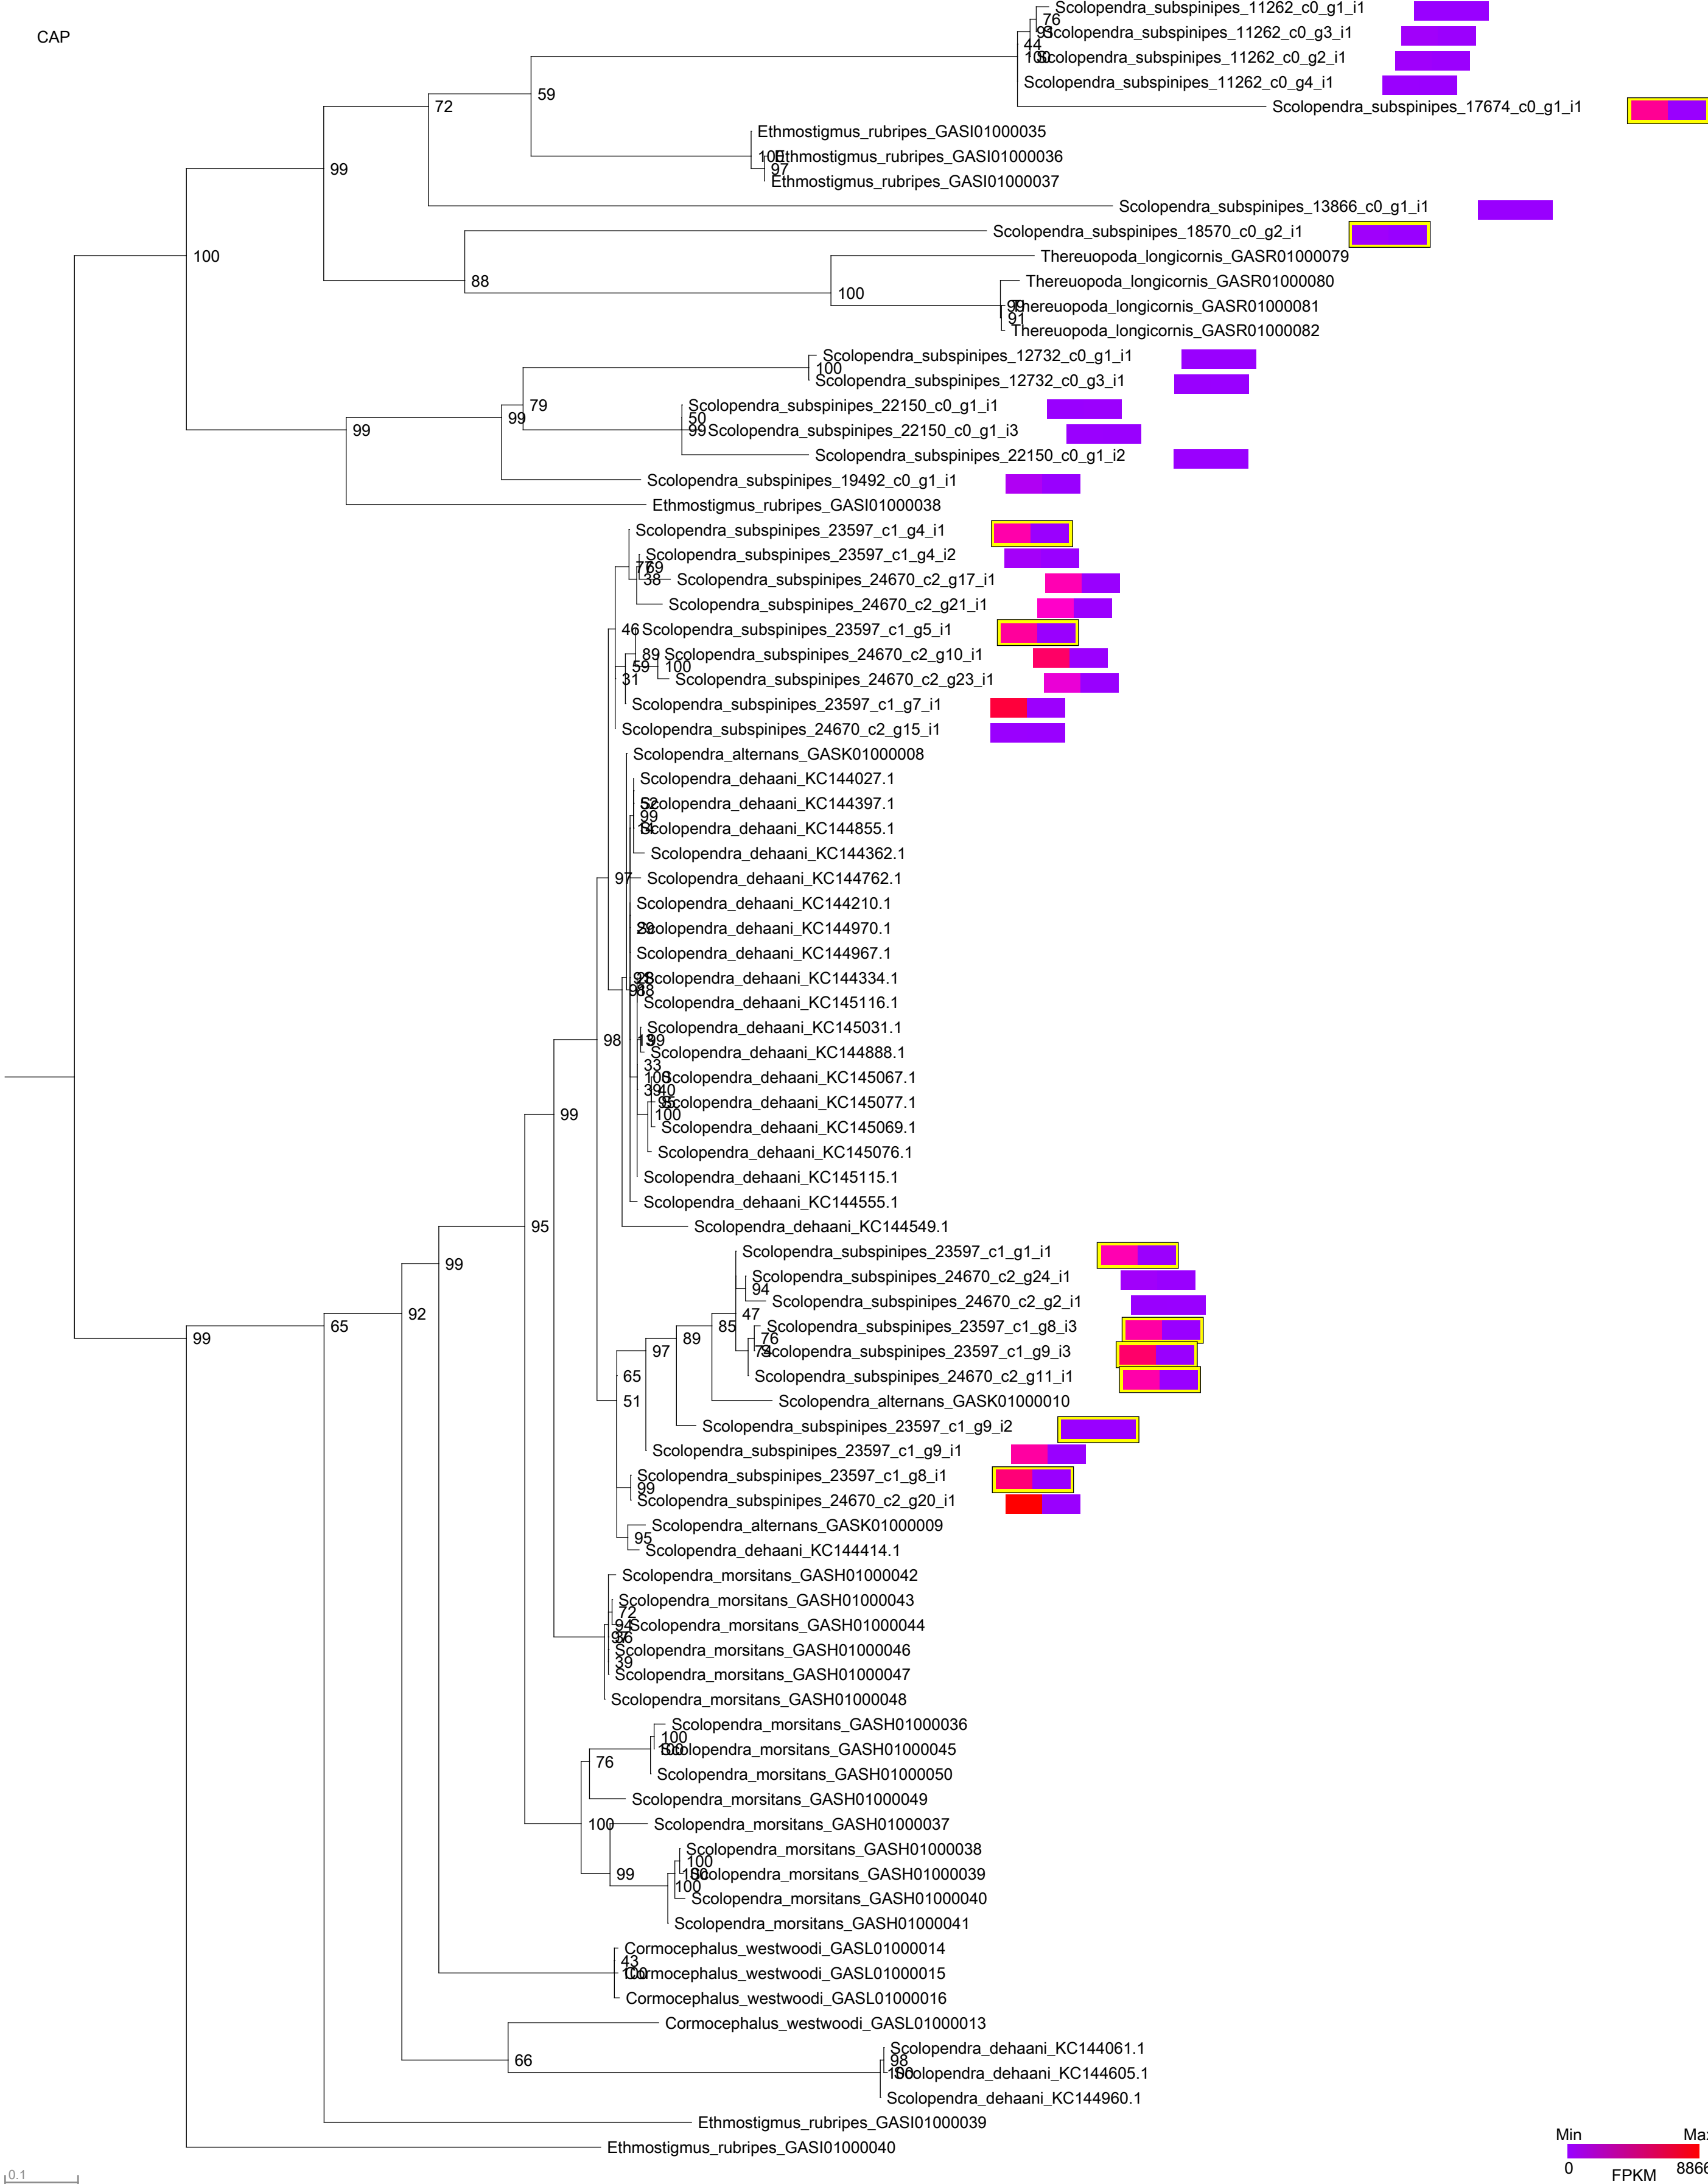

CO-Esterase B

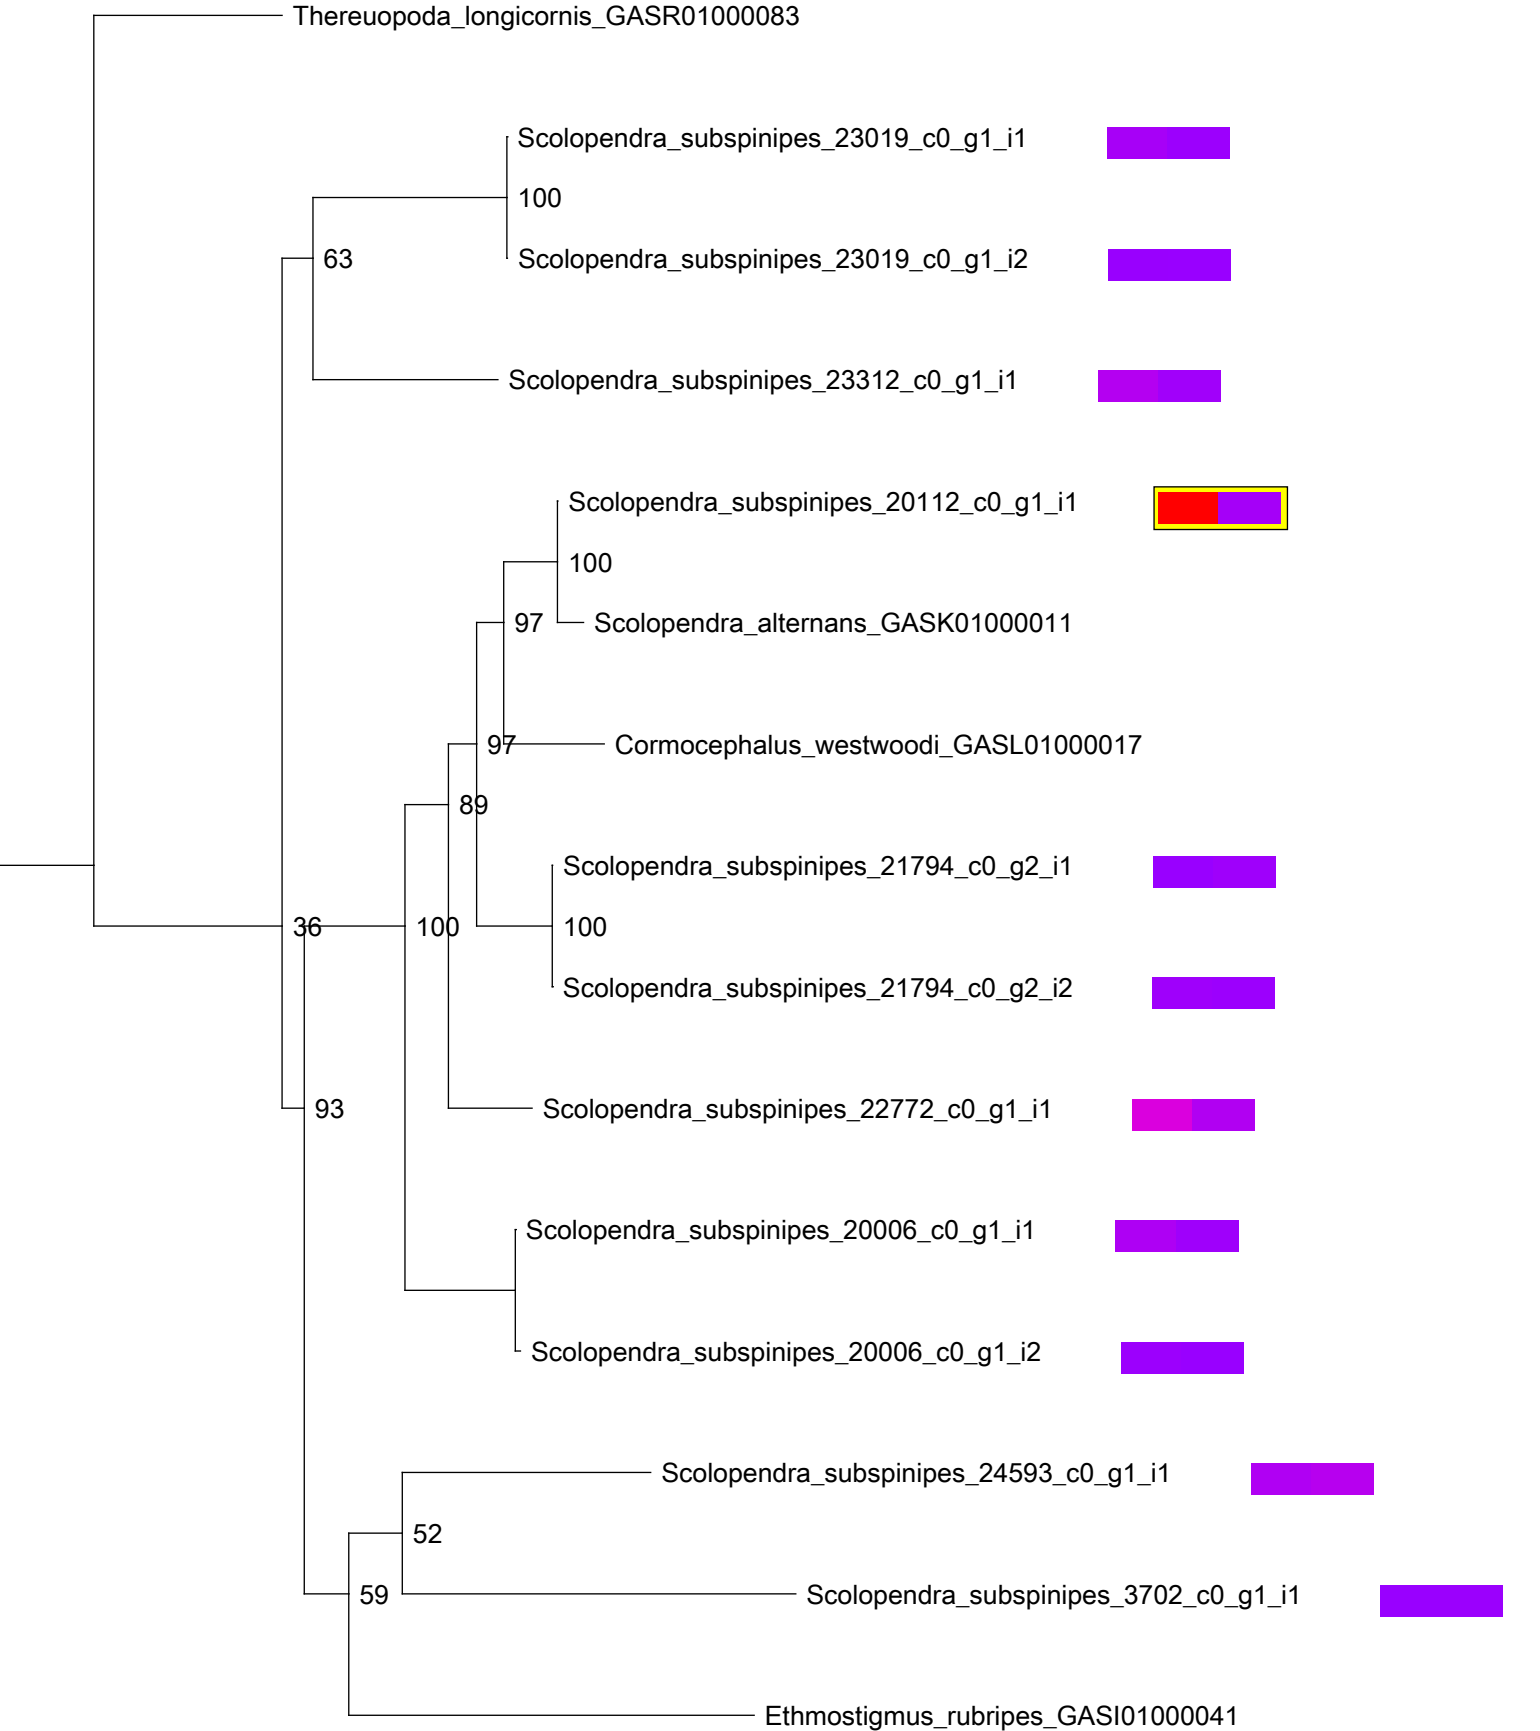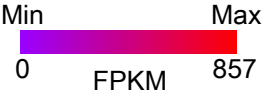

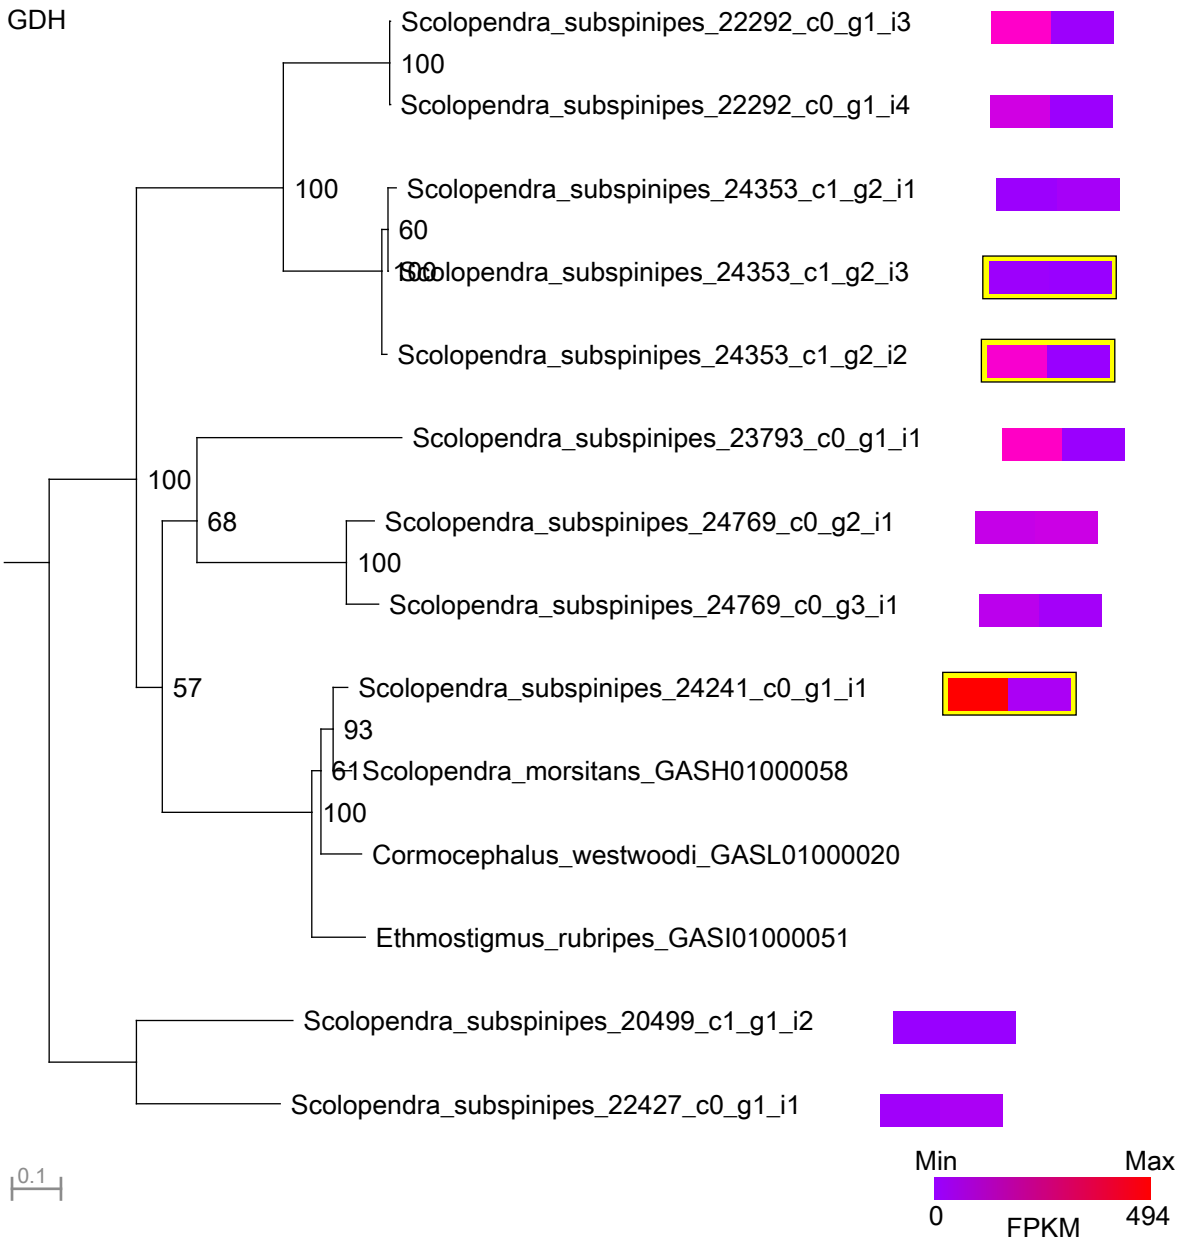

LDLA

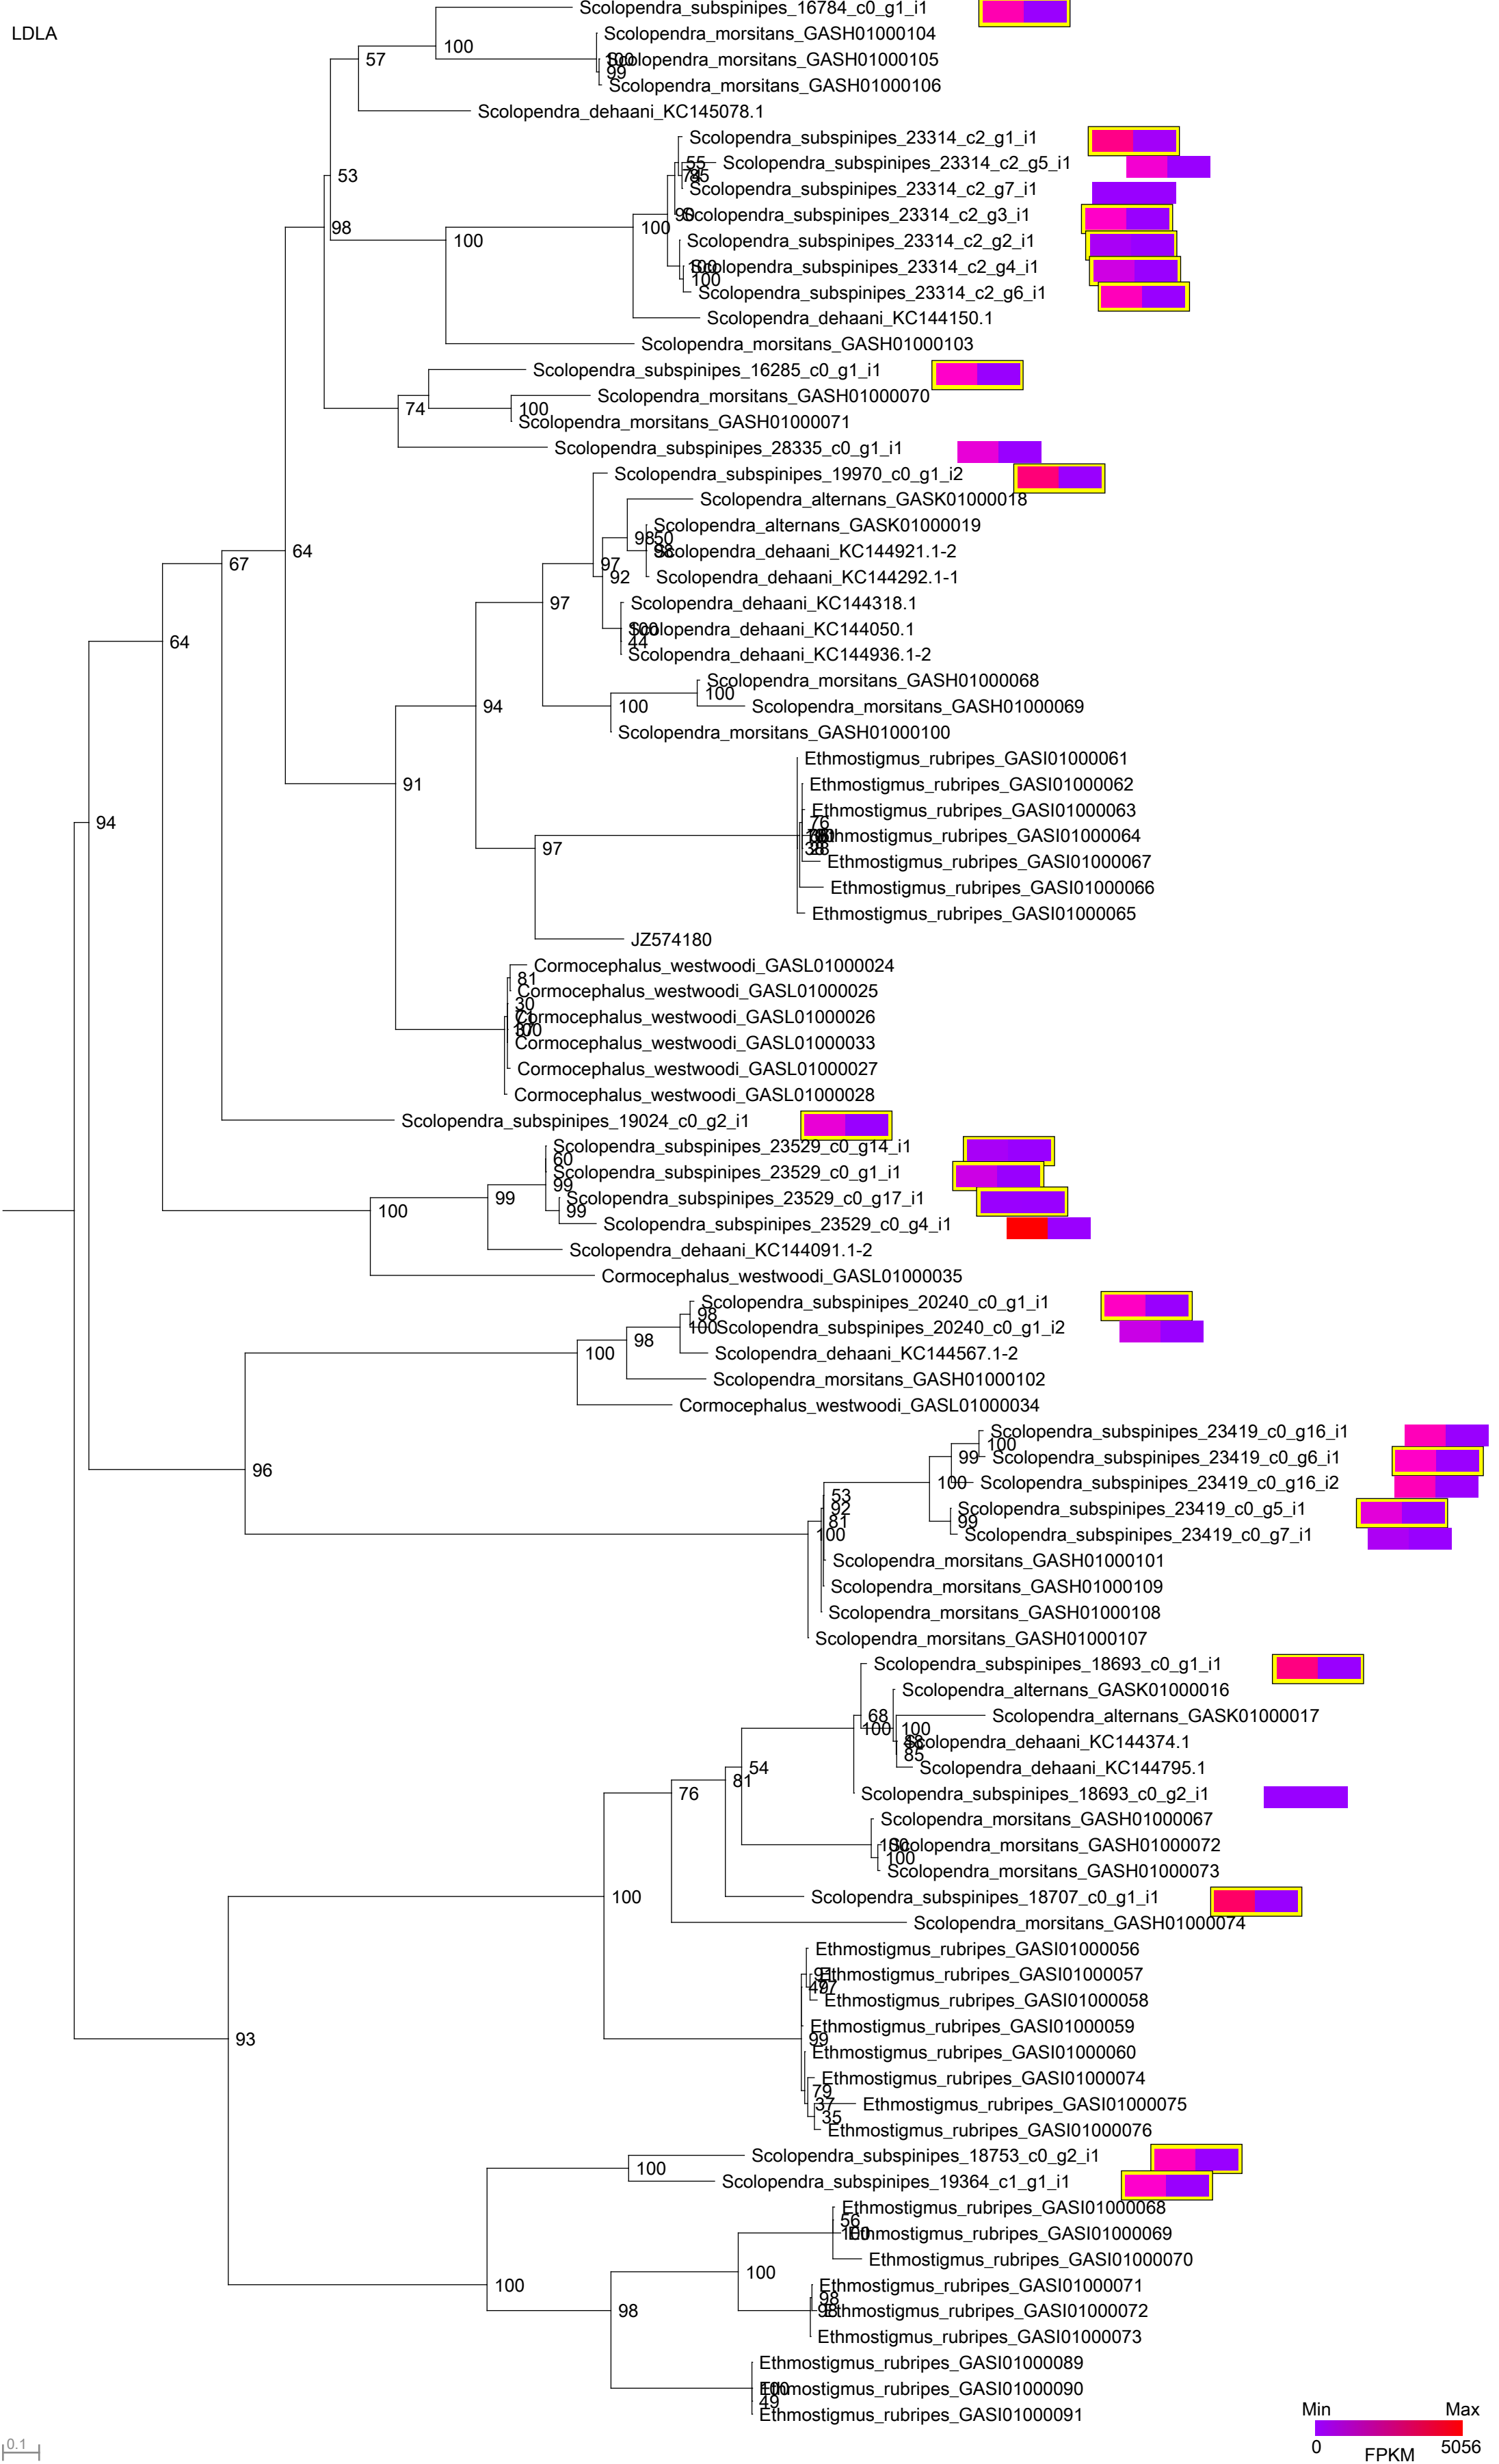

0.1

Min Max  
0 FPKM 5056



Novel1

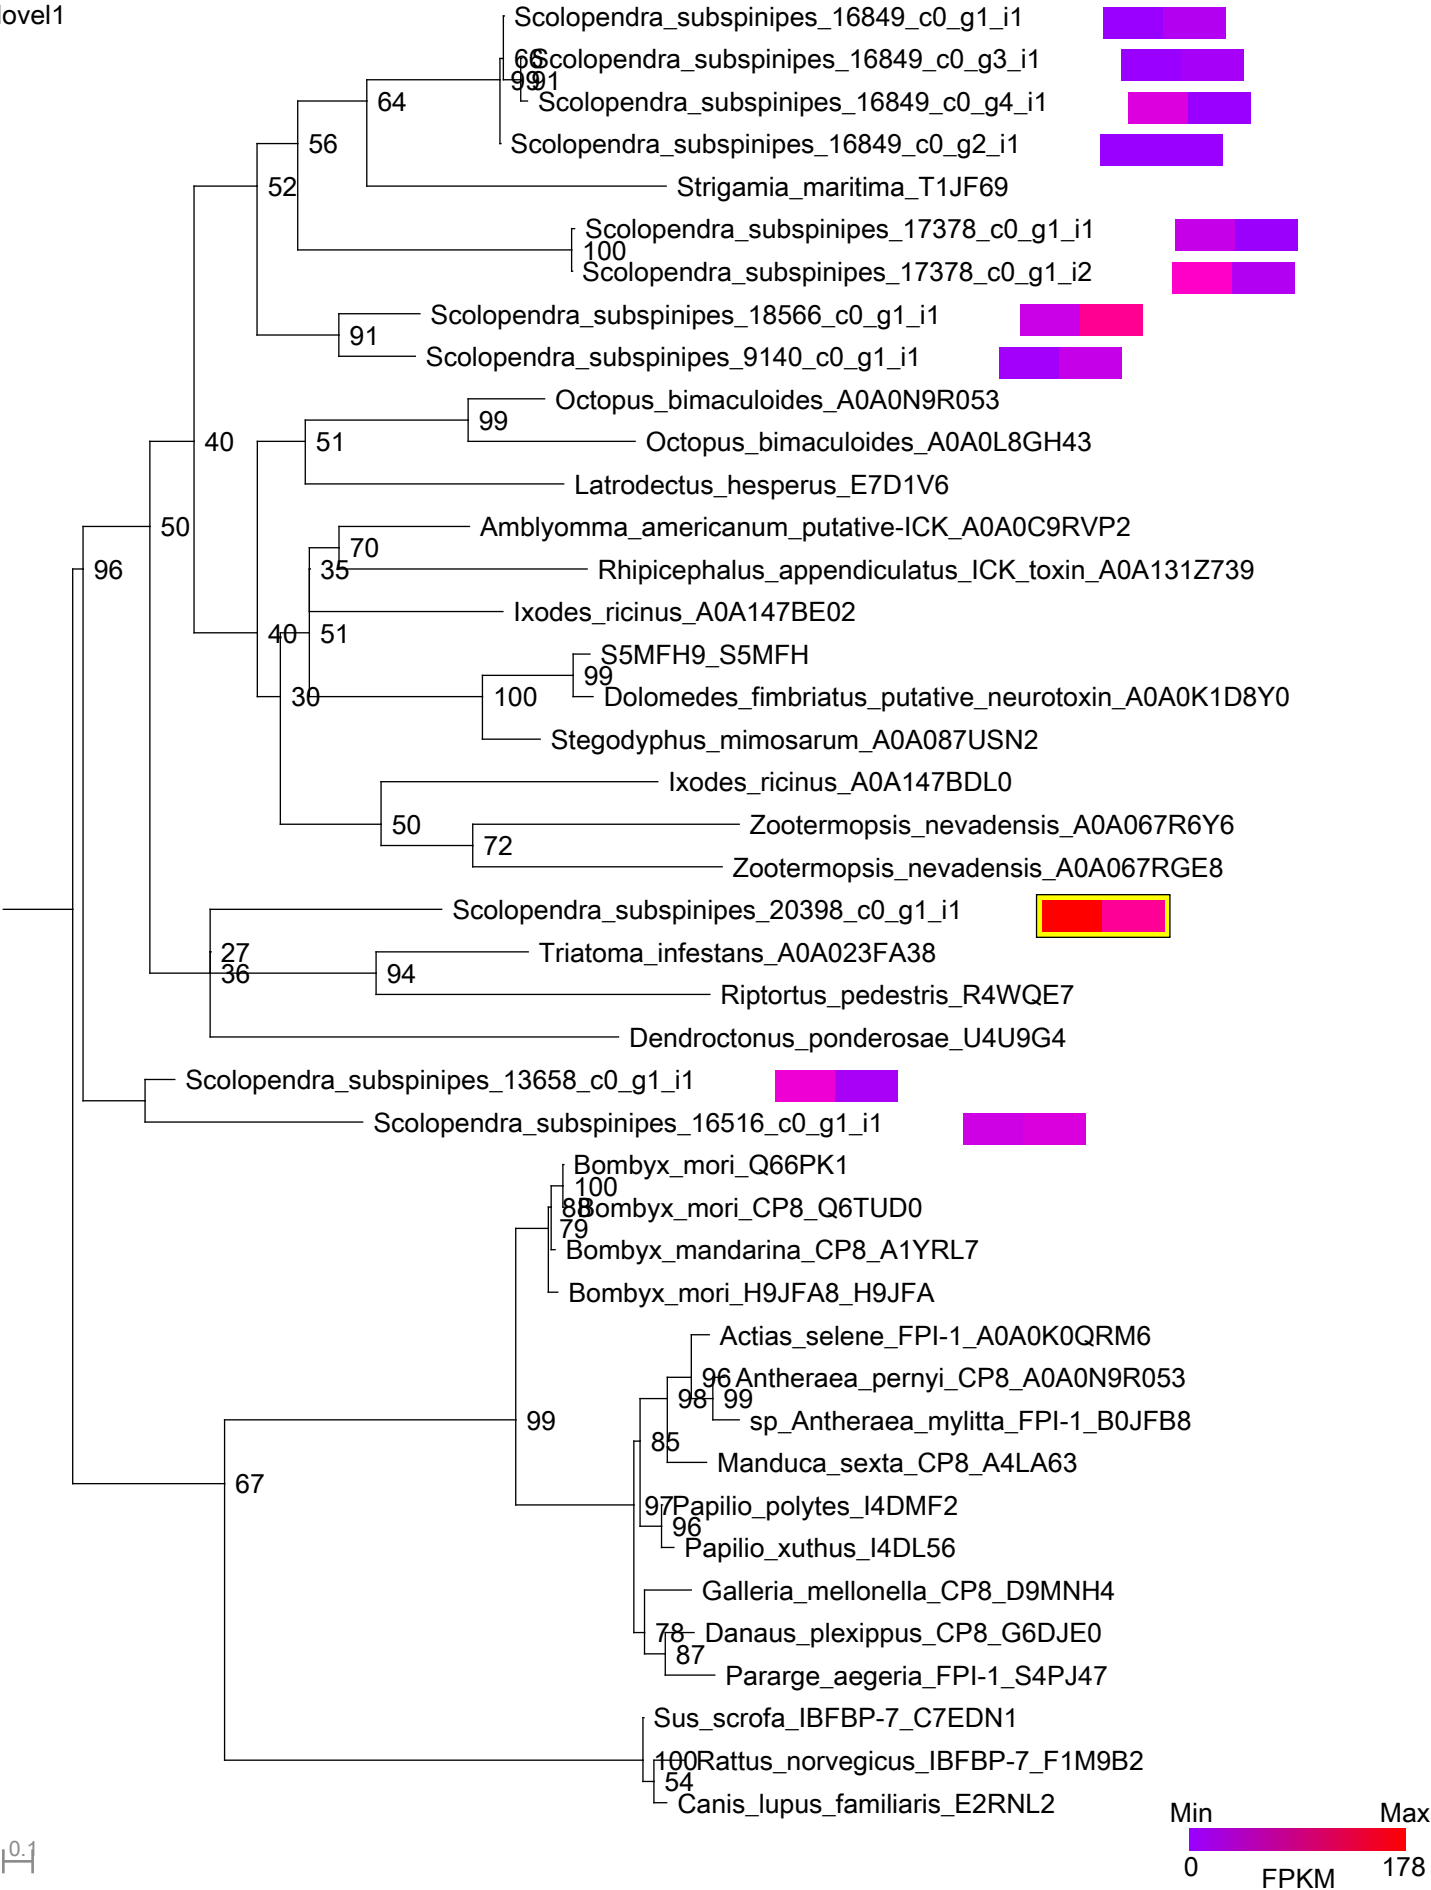

PLA2

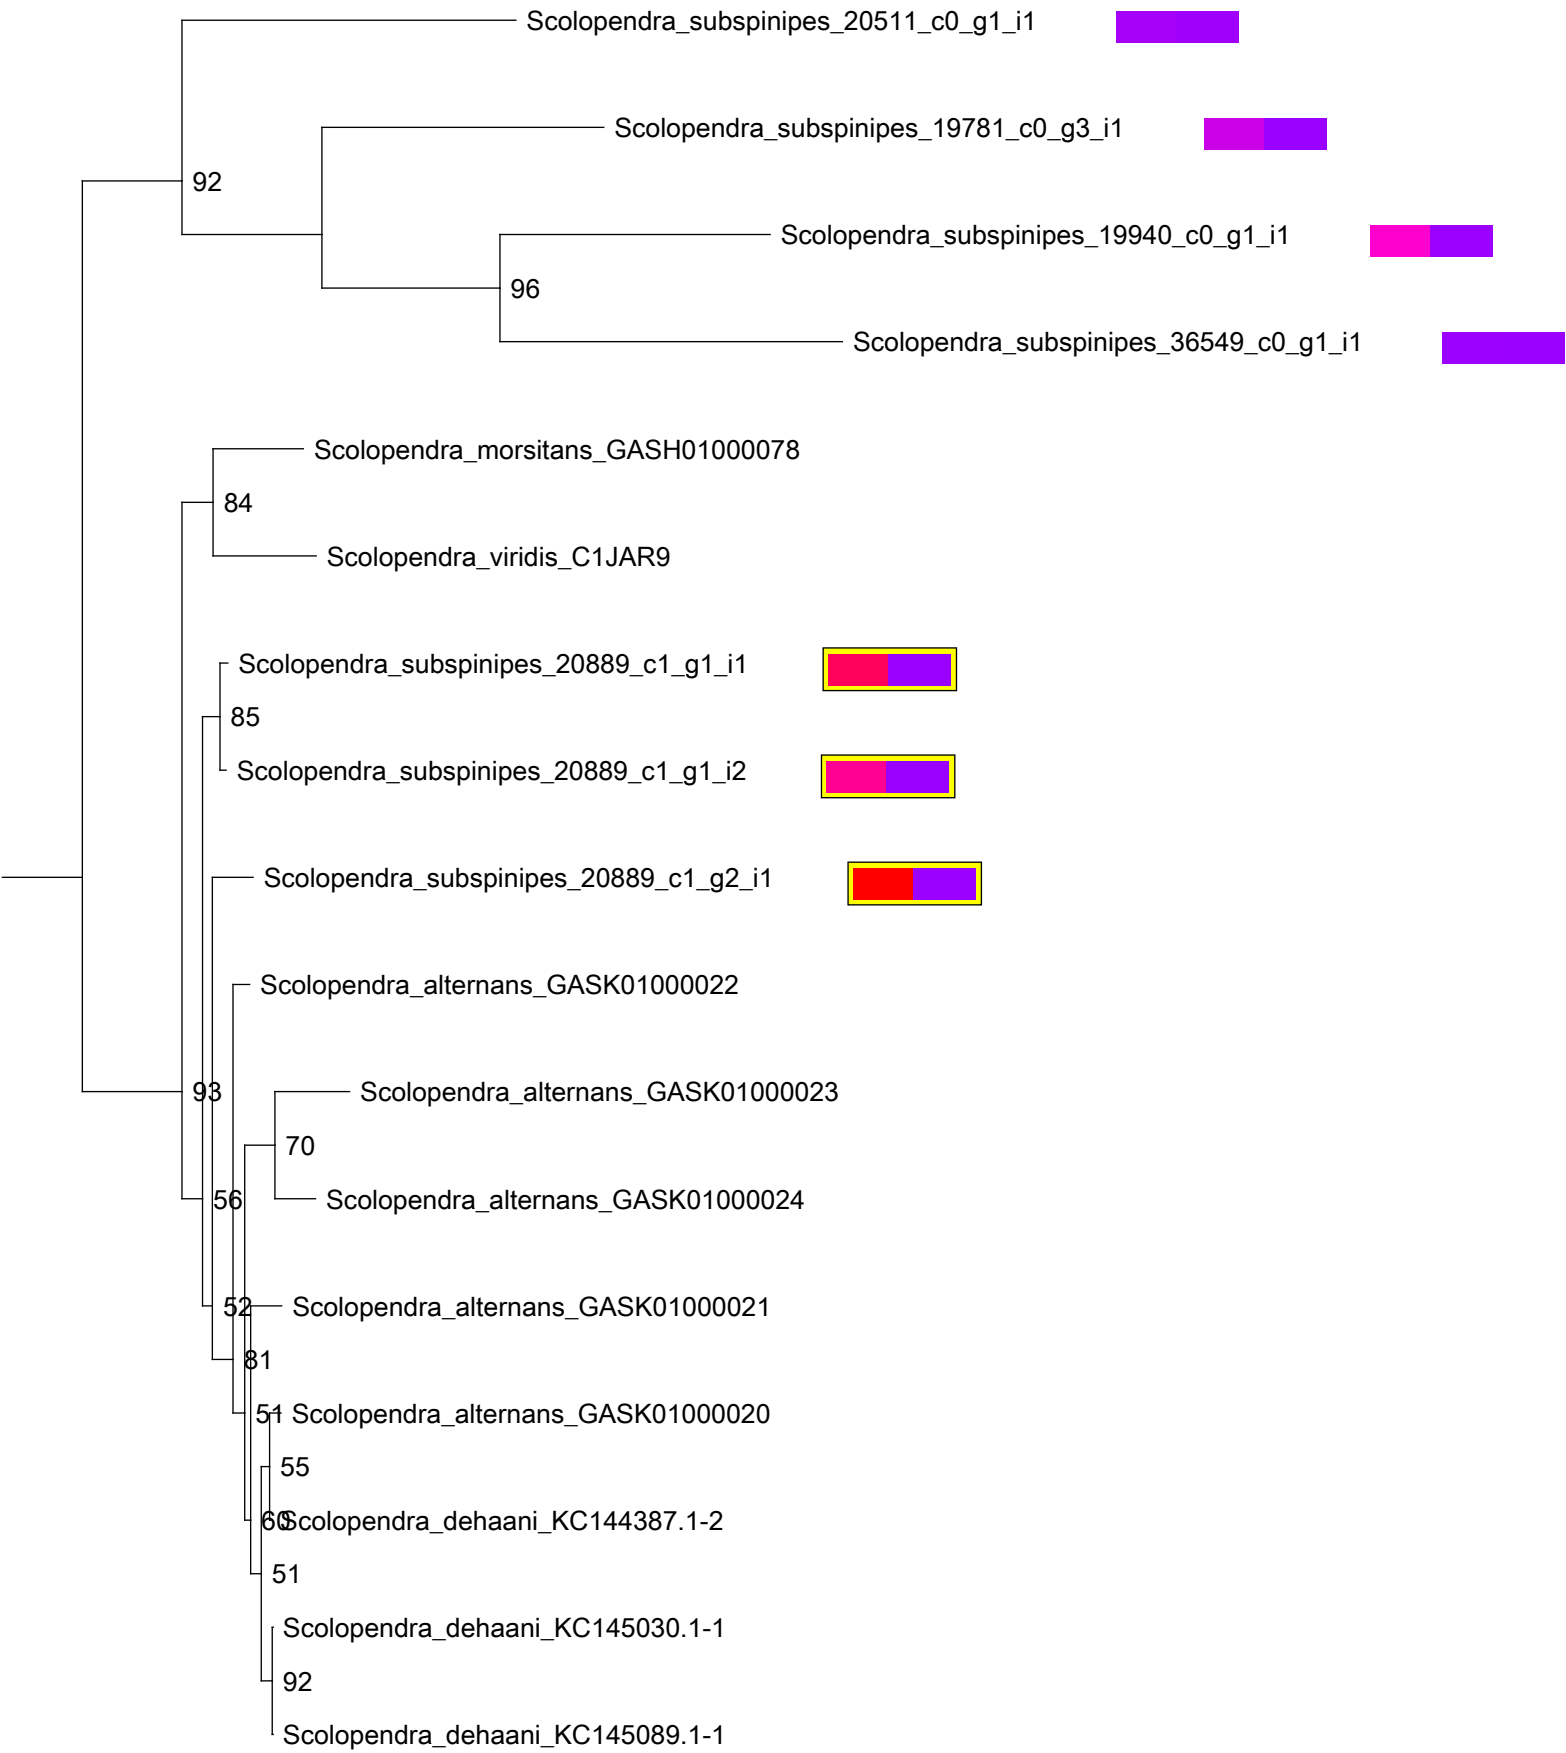

0.1

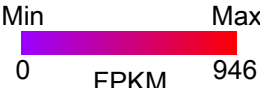

pM12A

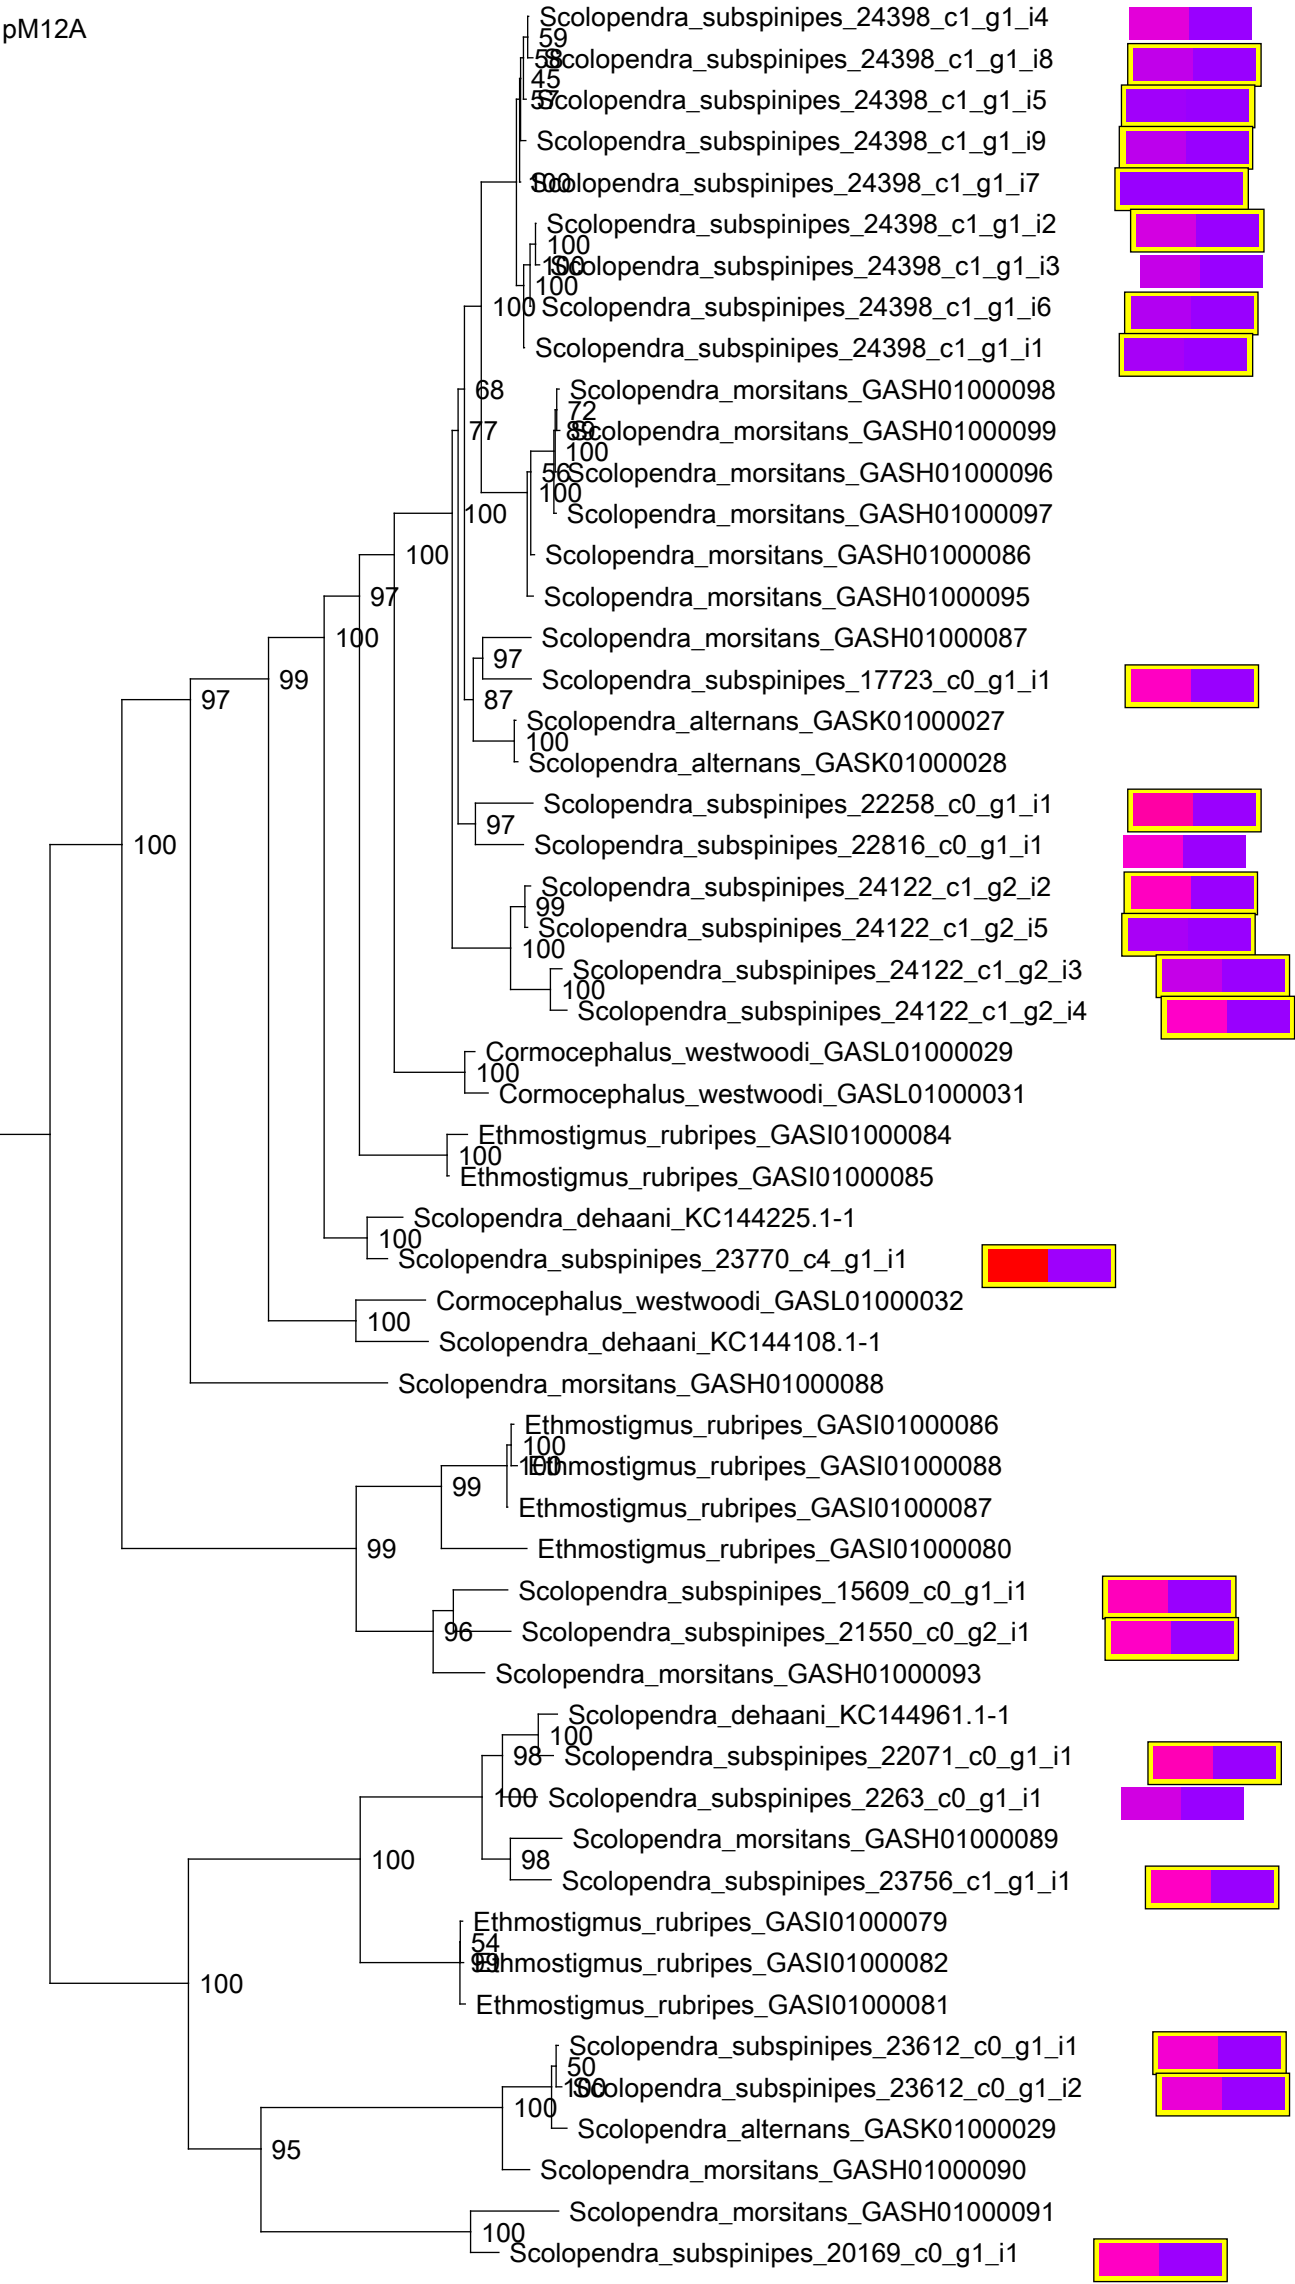

H<sup>0</sup>1

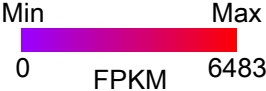



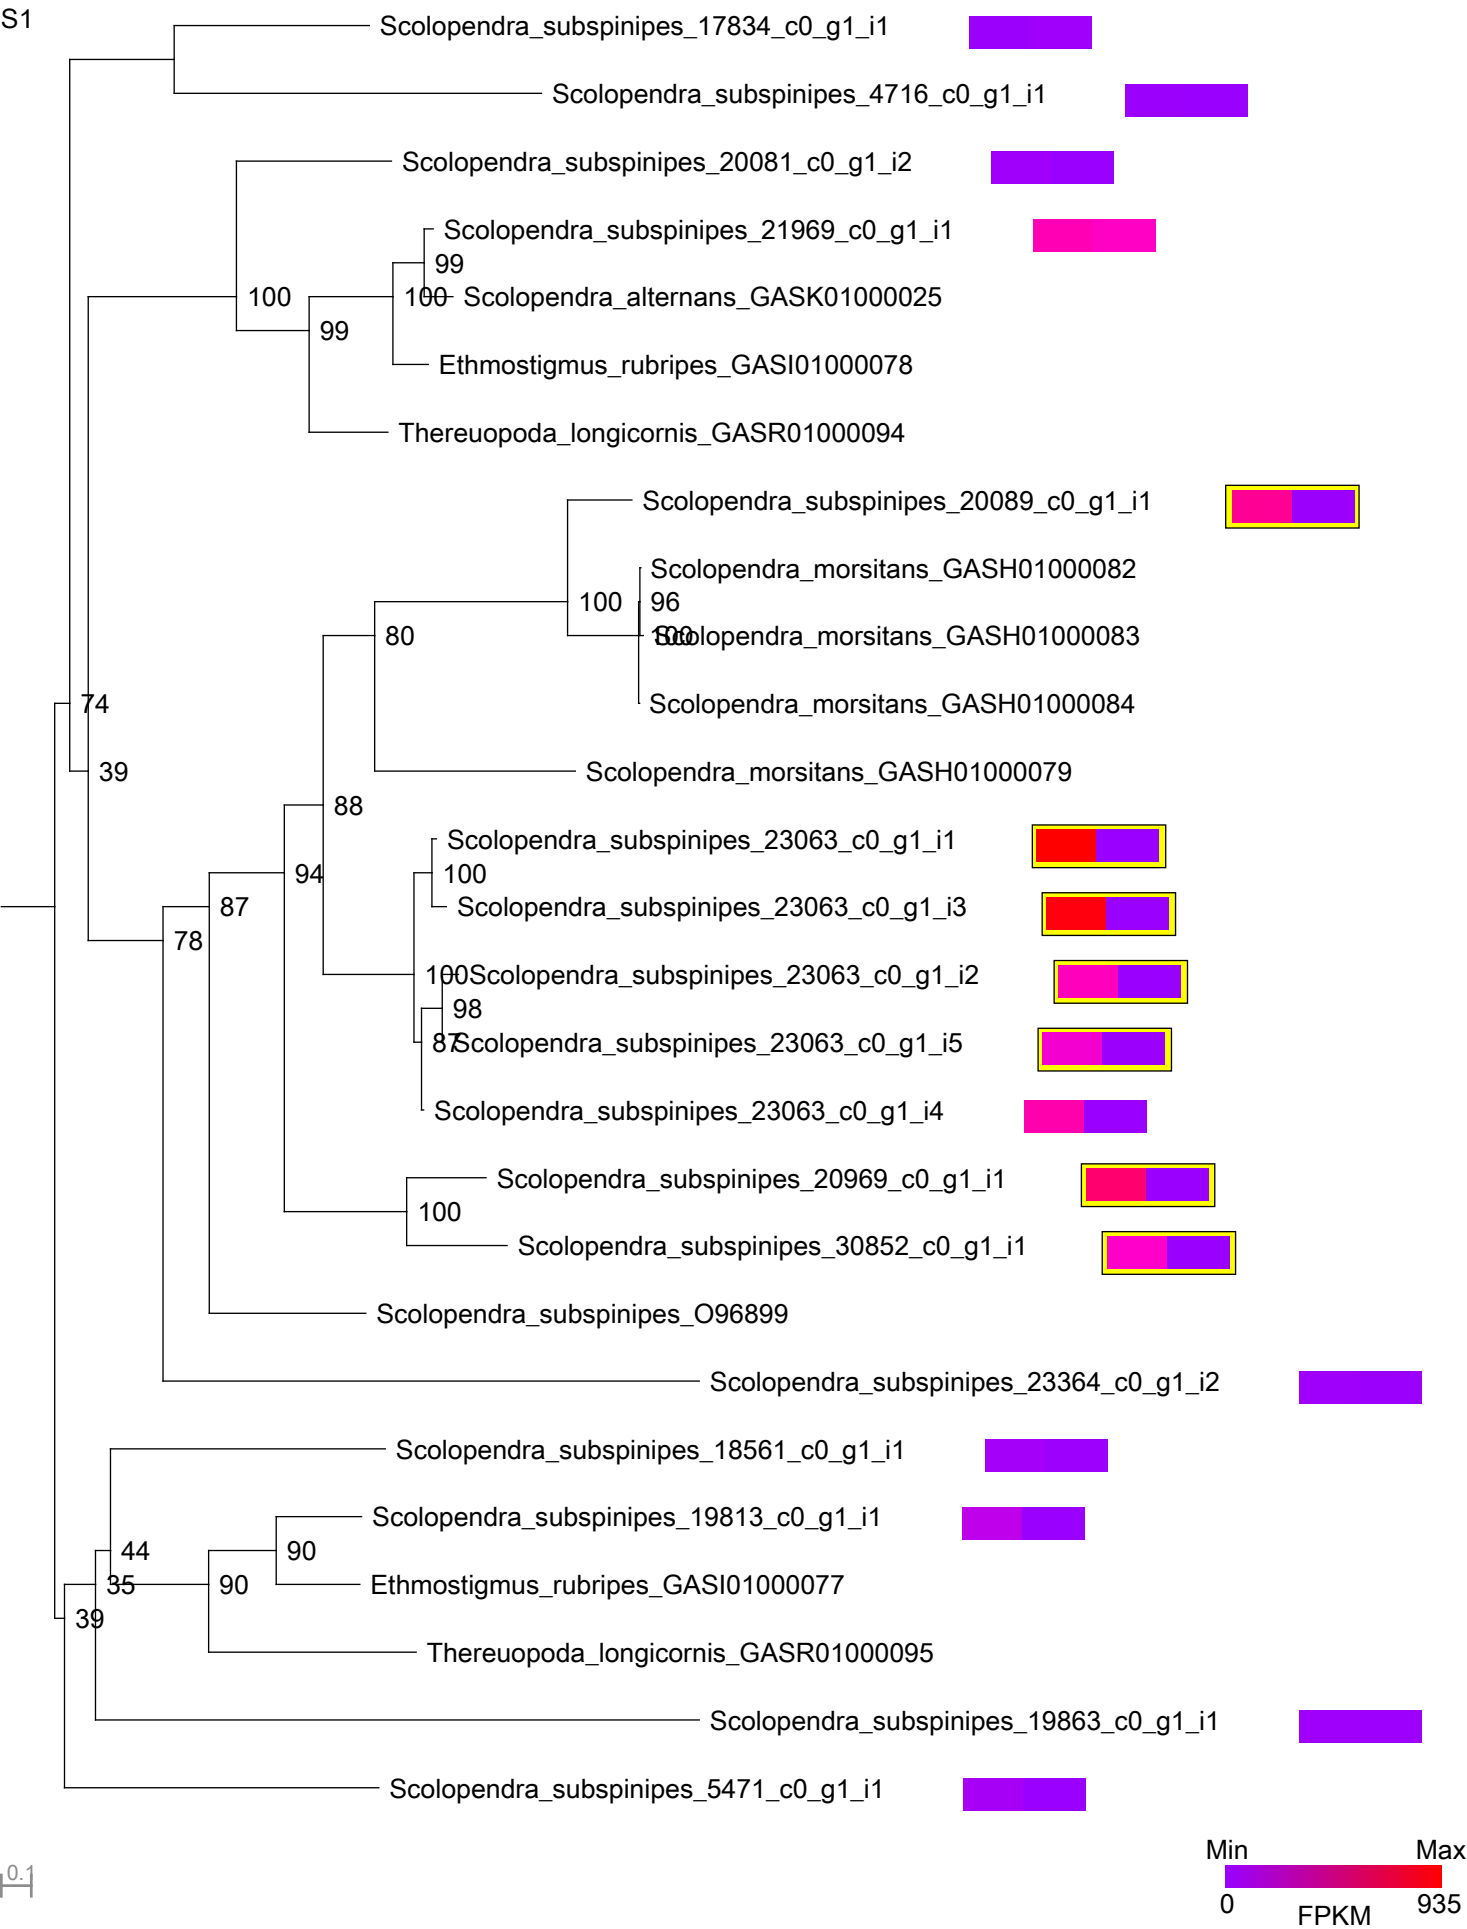

SLPTX03

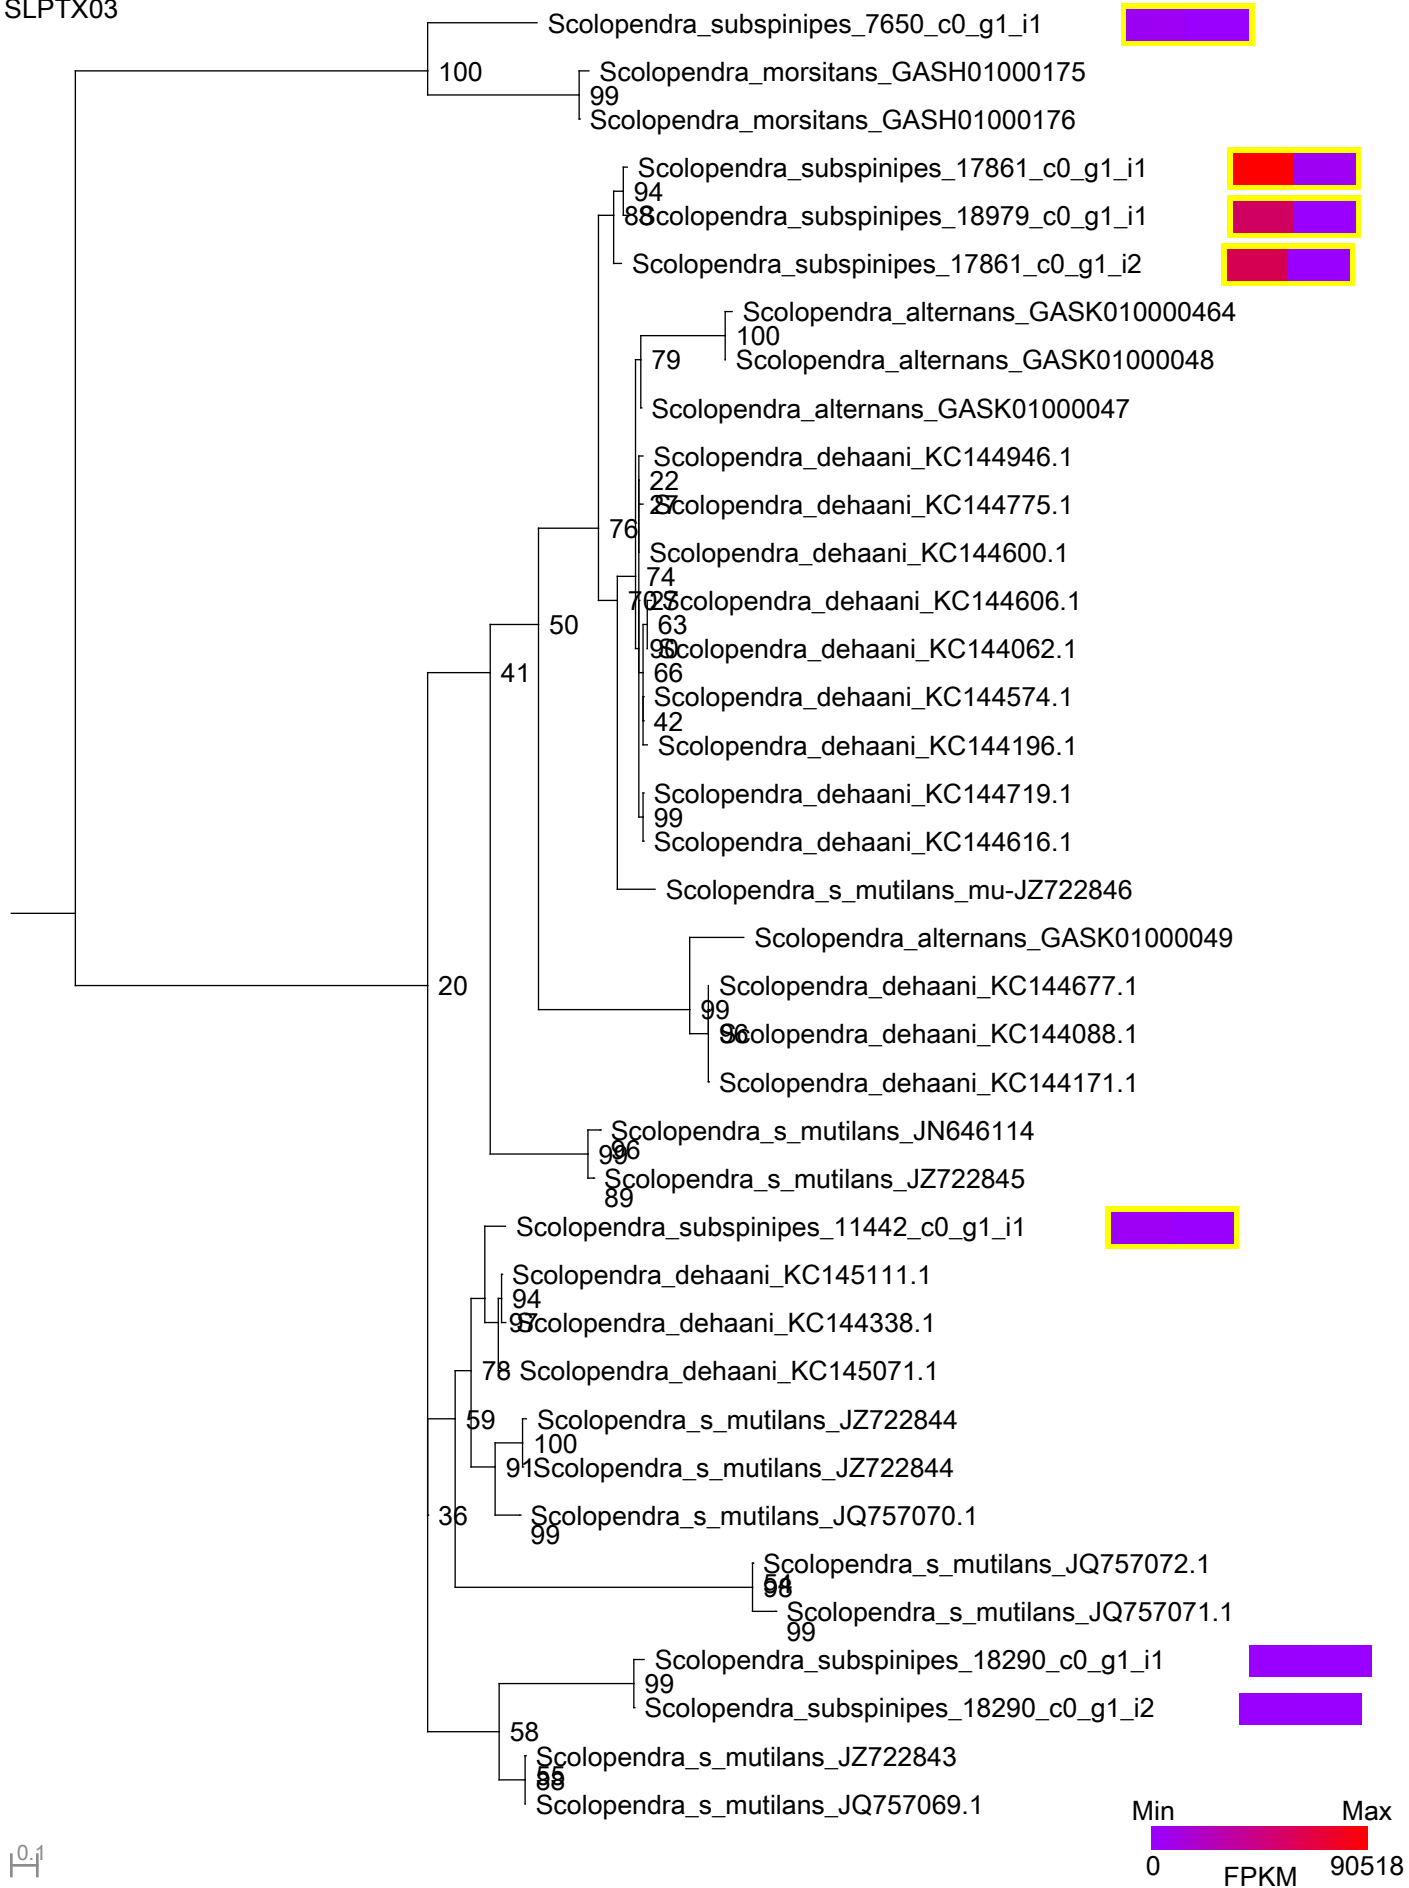

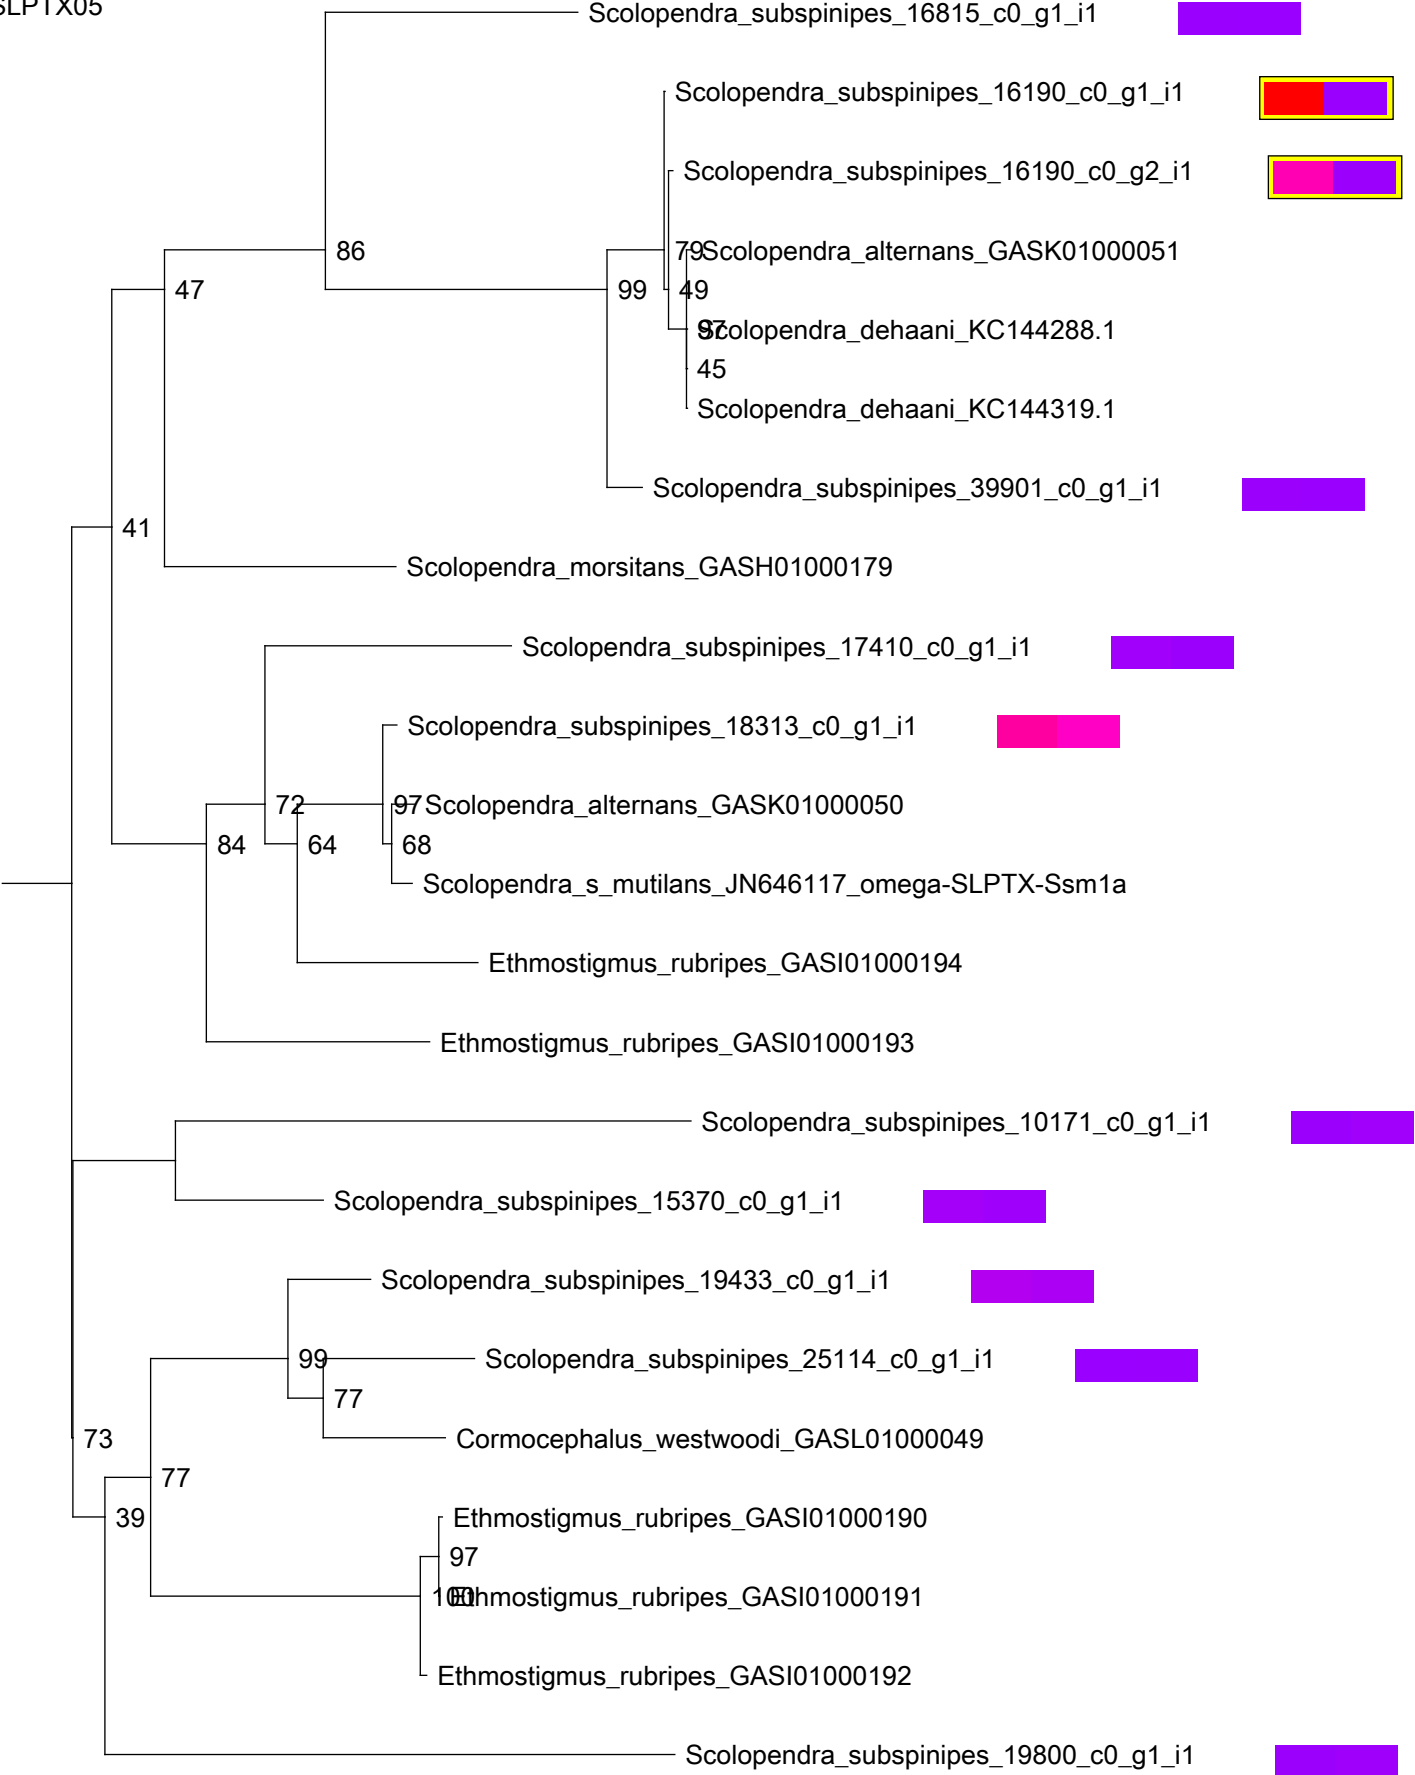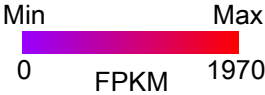

SLPTX07

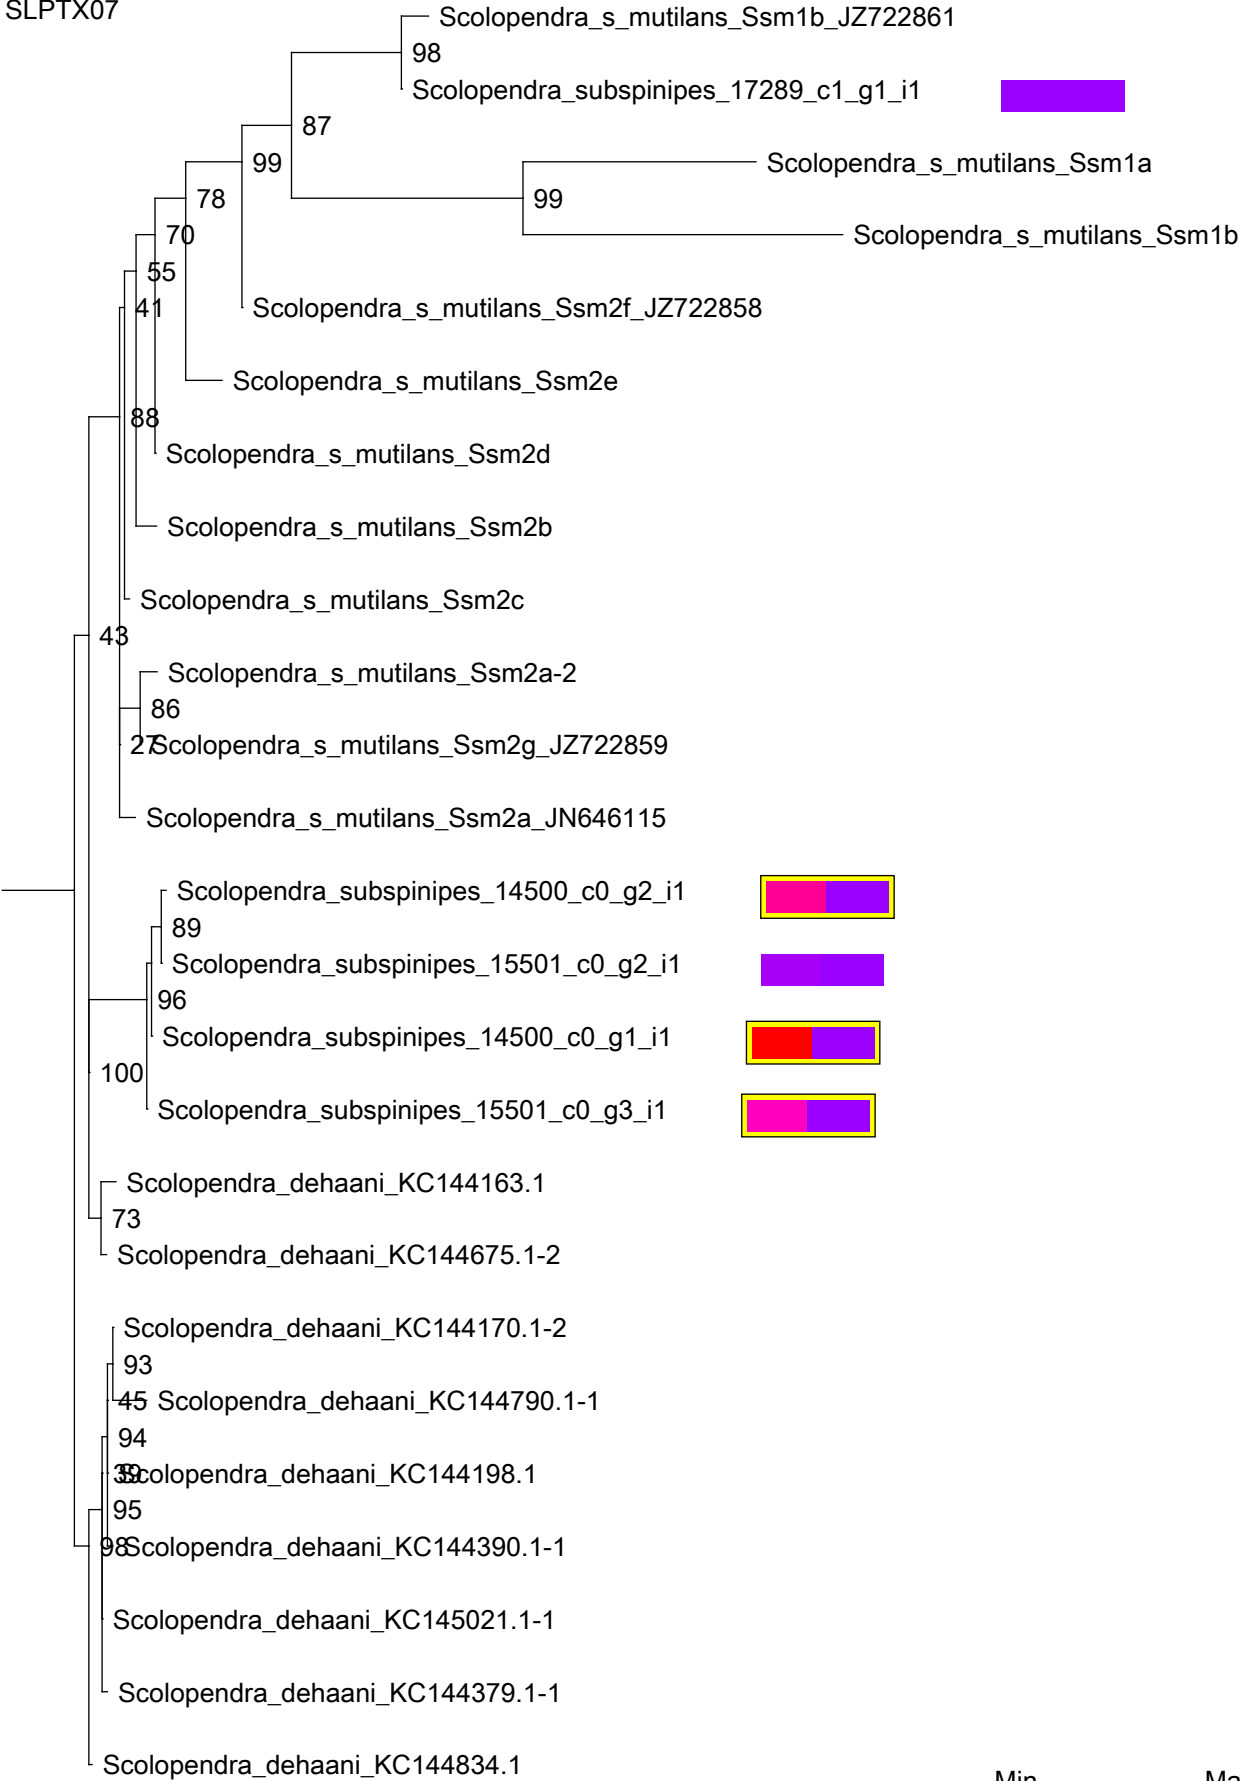

0.1

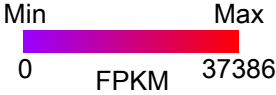

SLPTX11

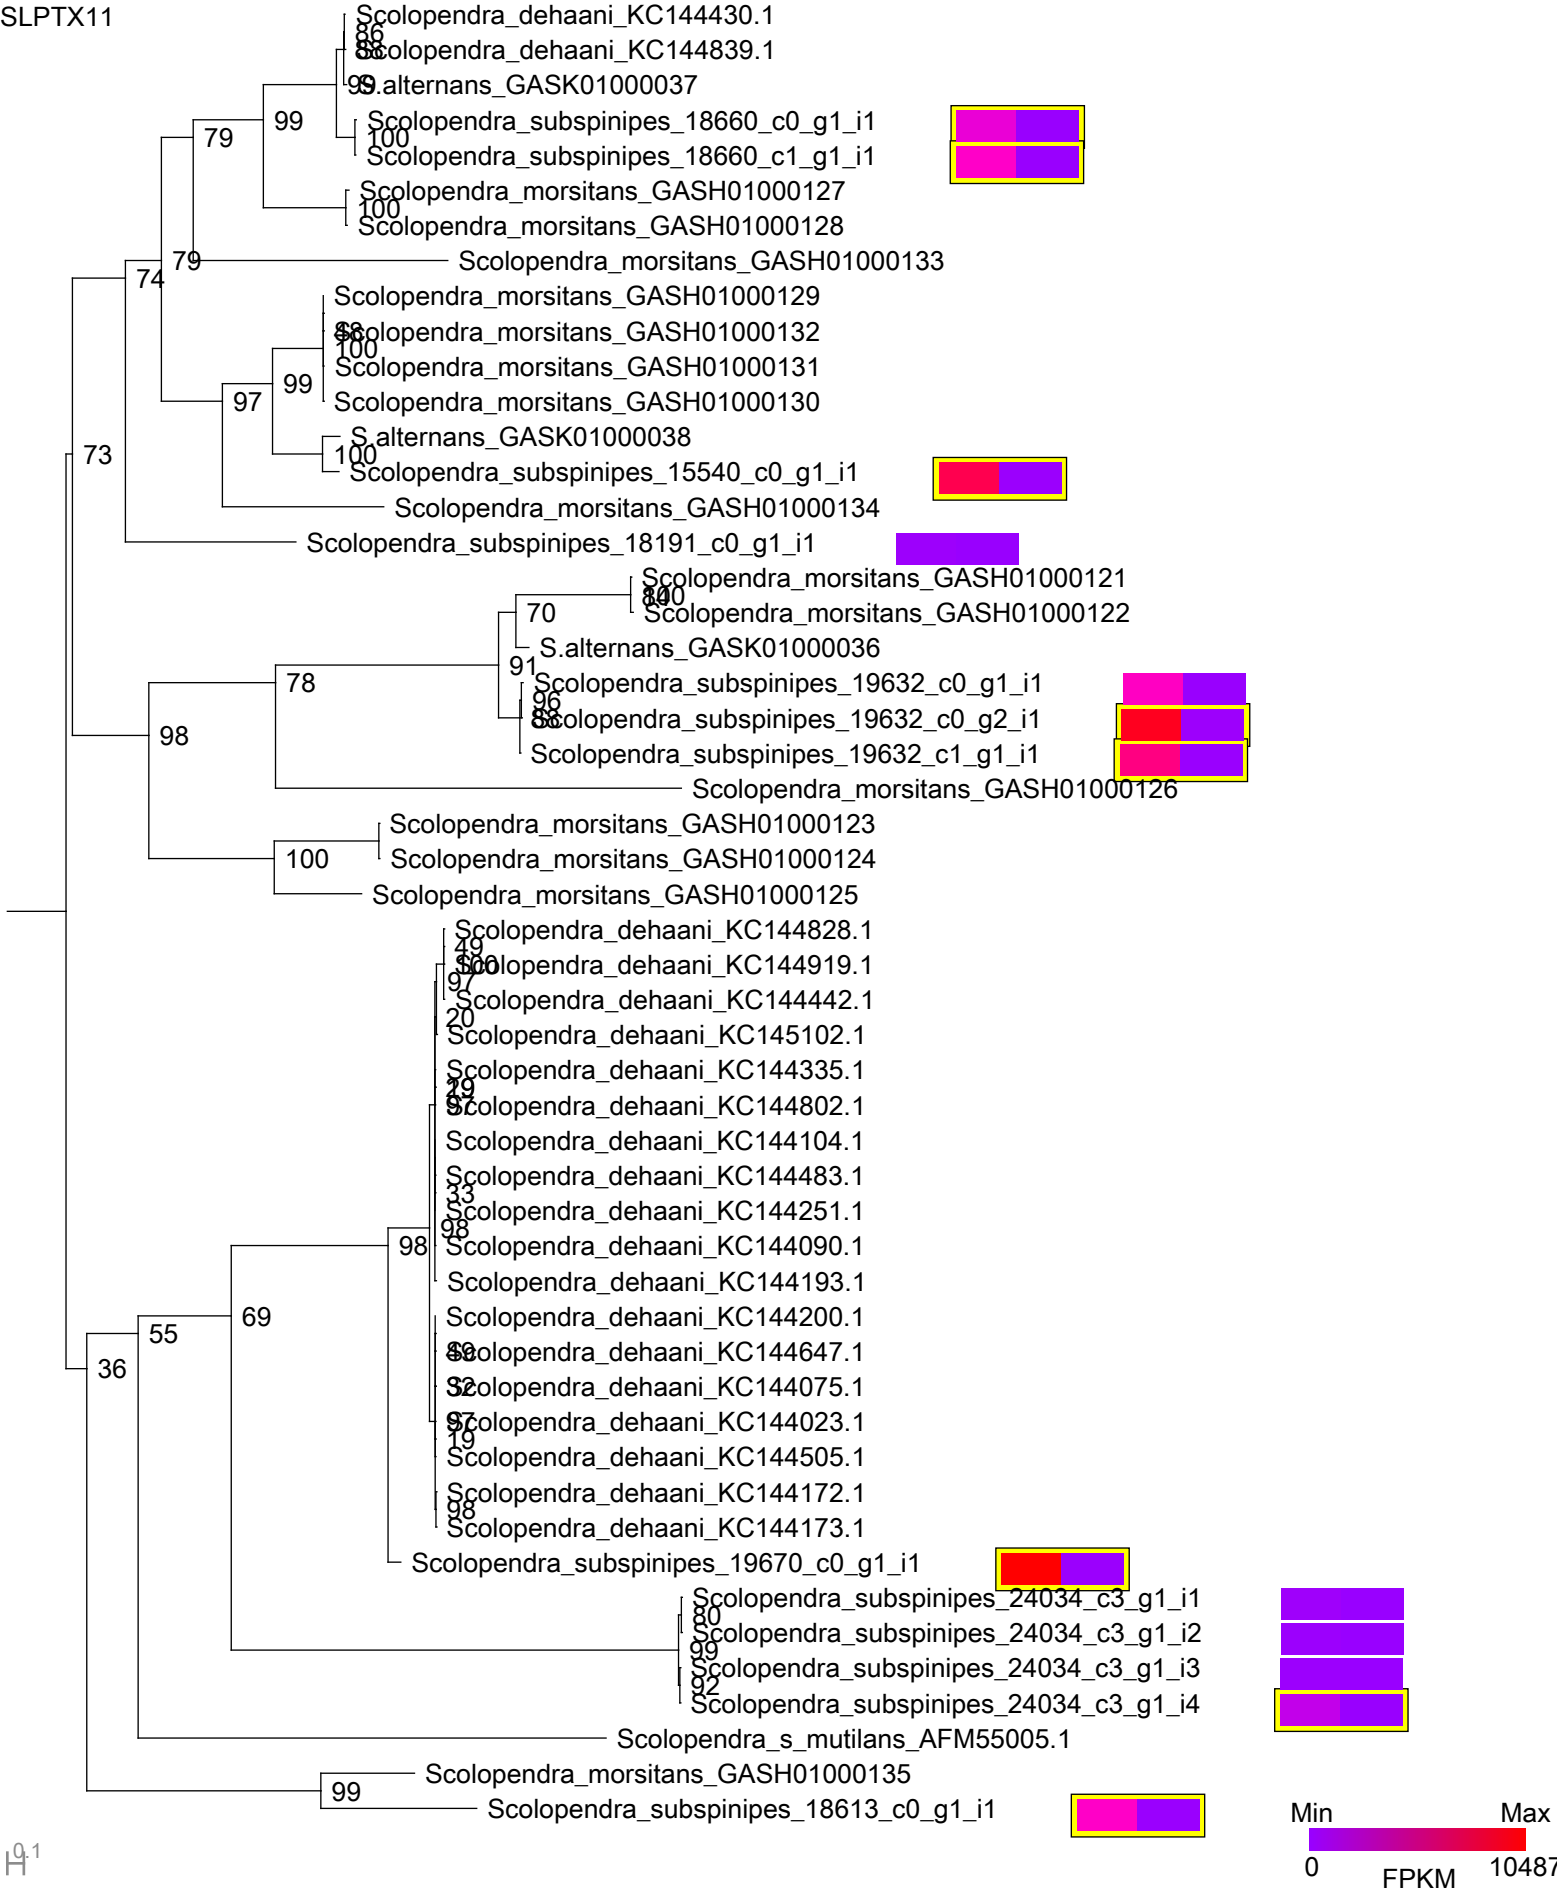

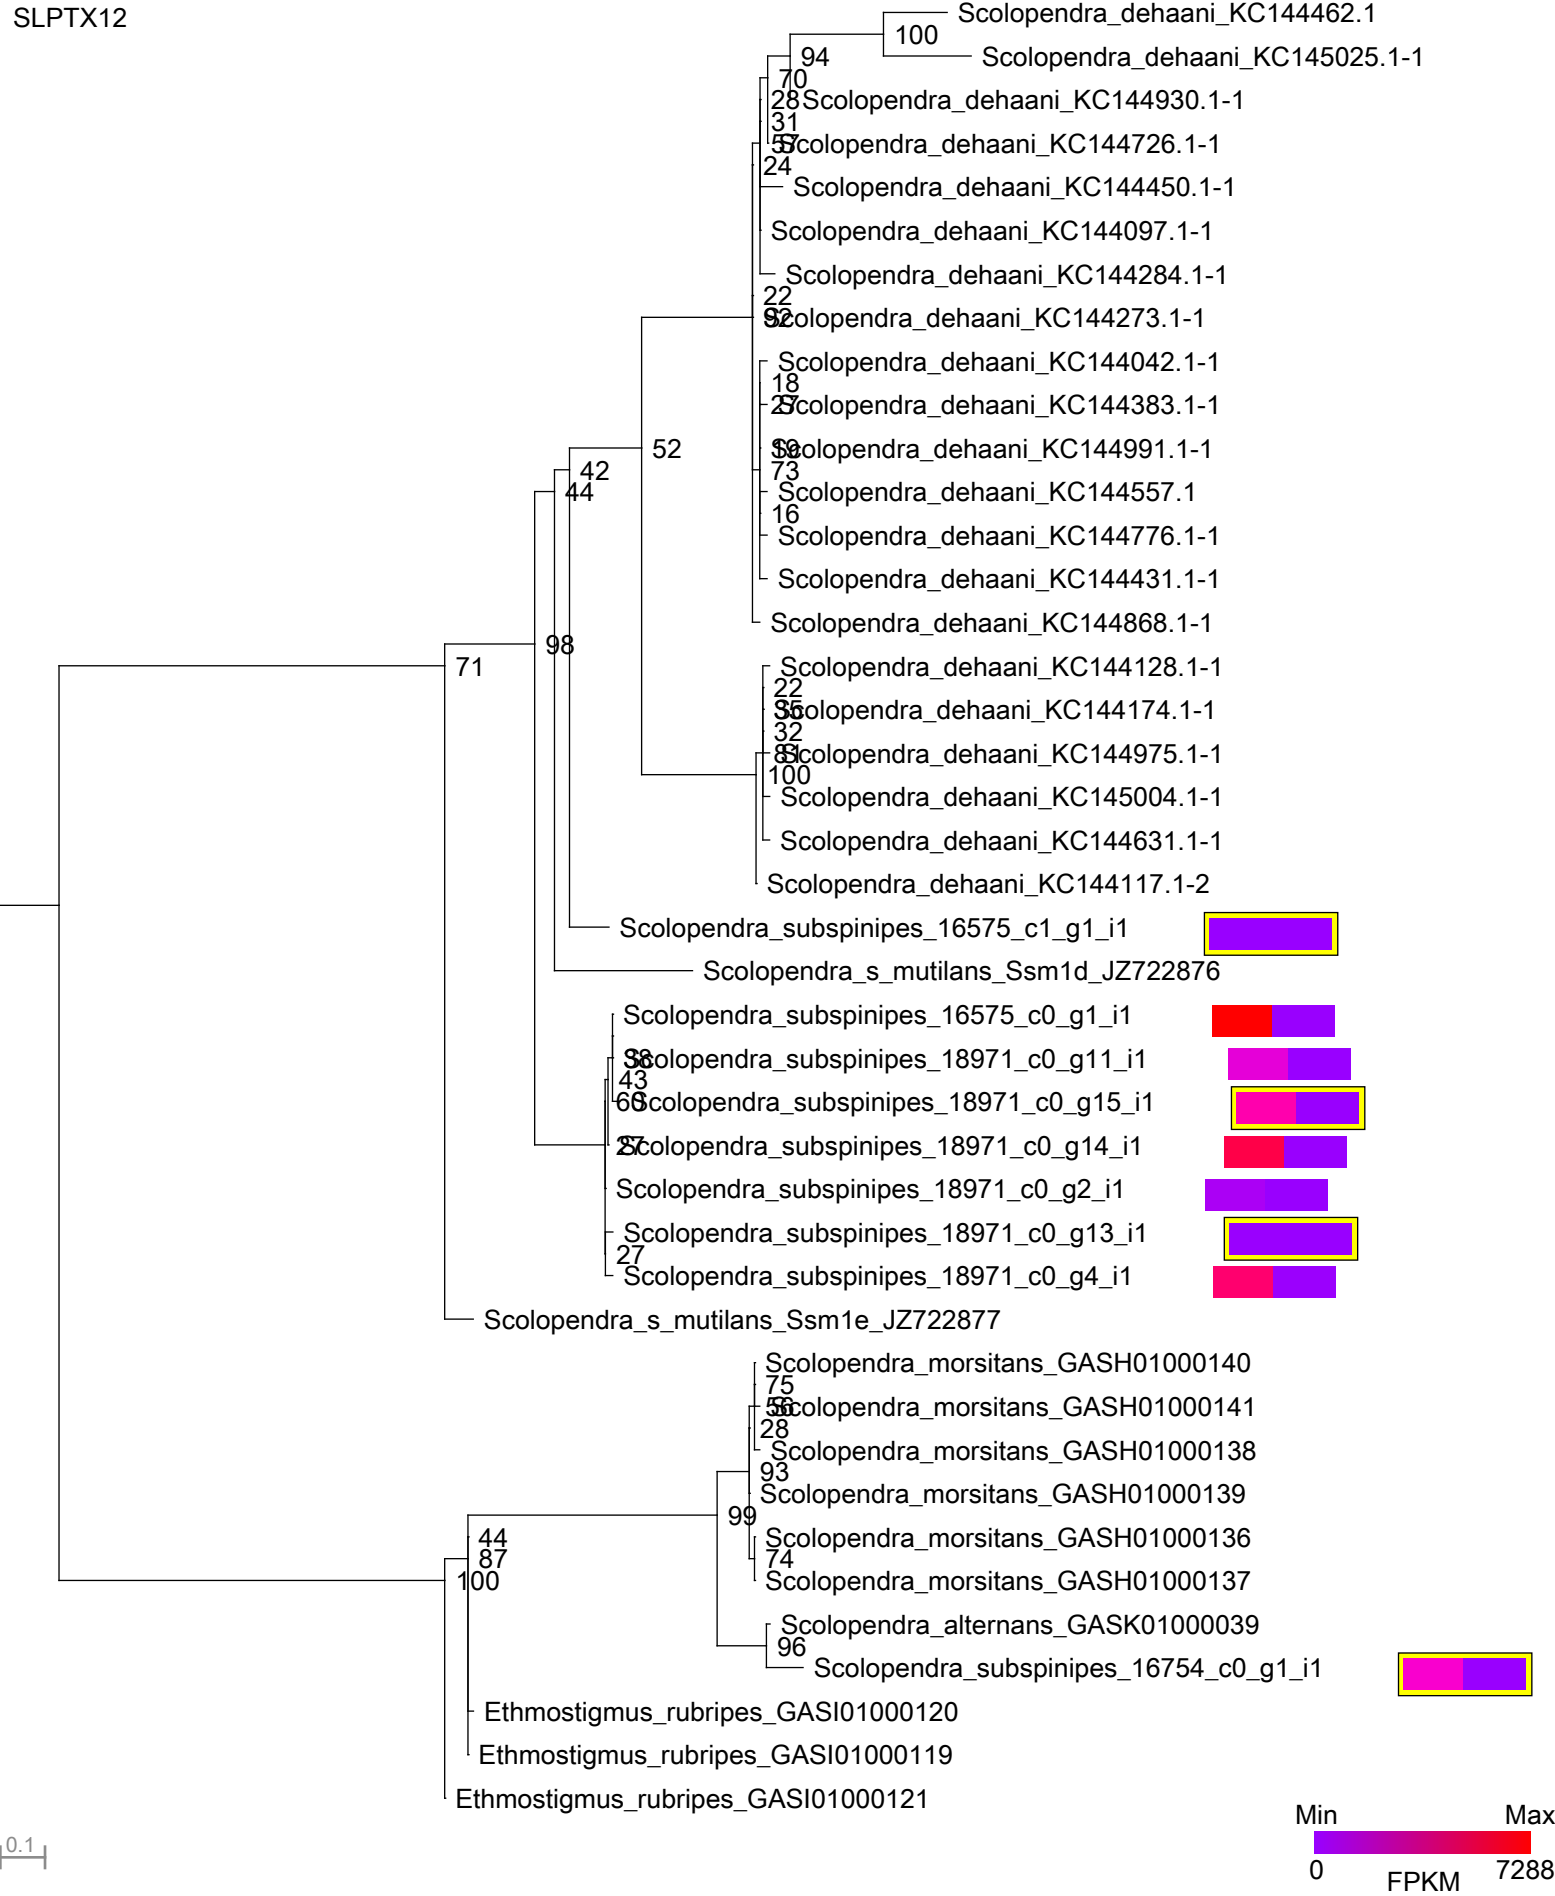



SLPTX13

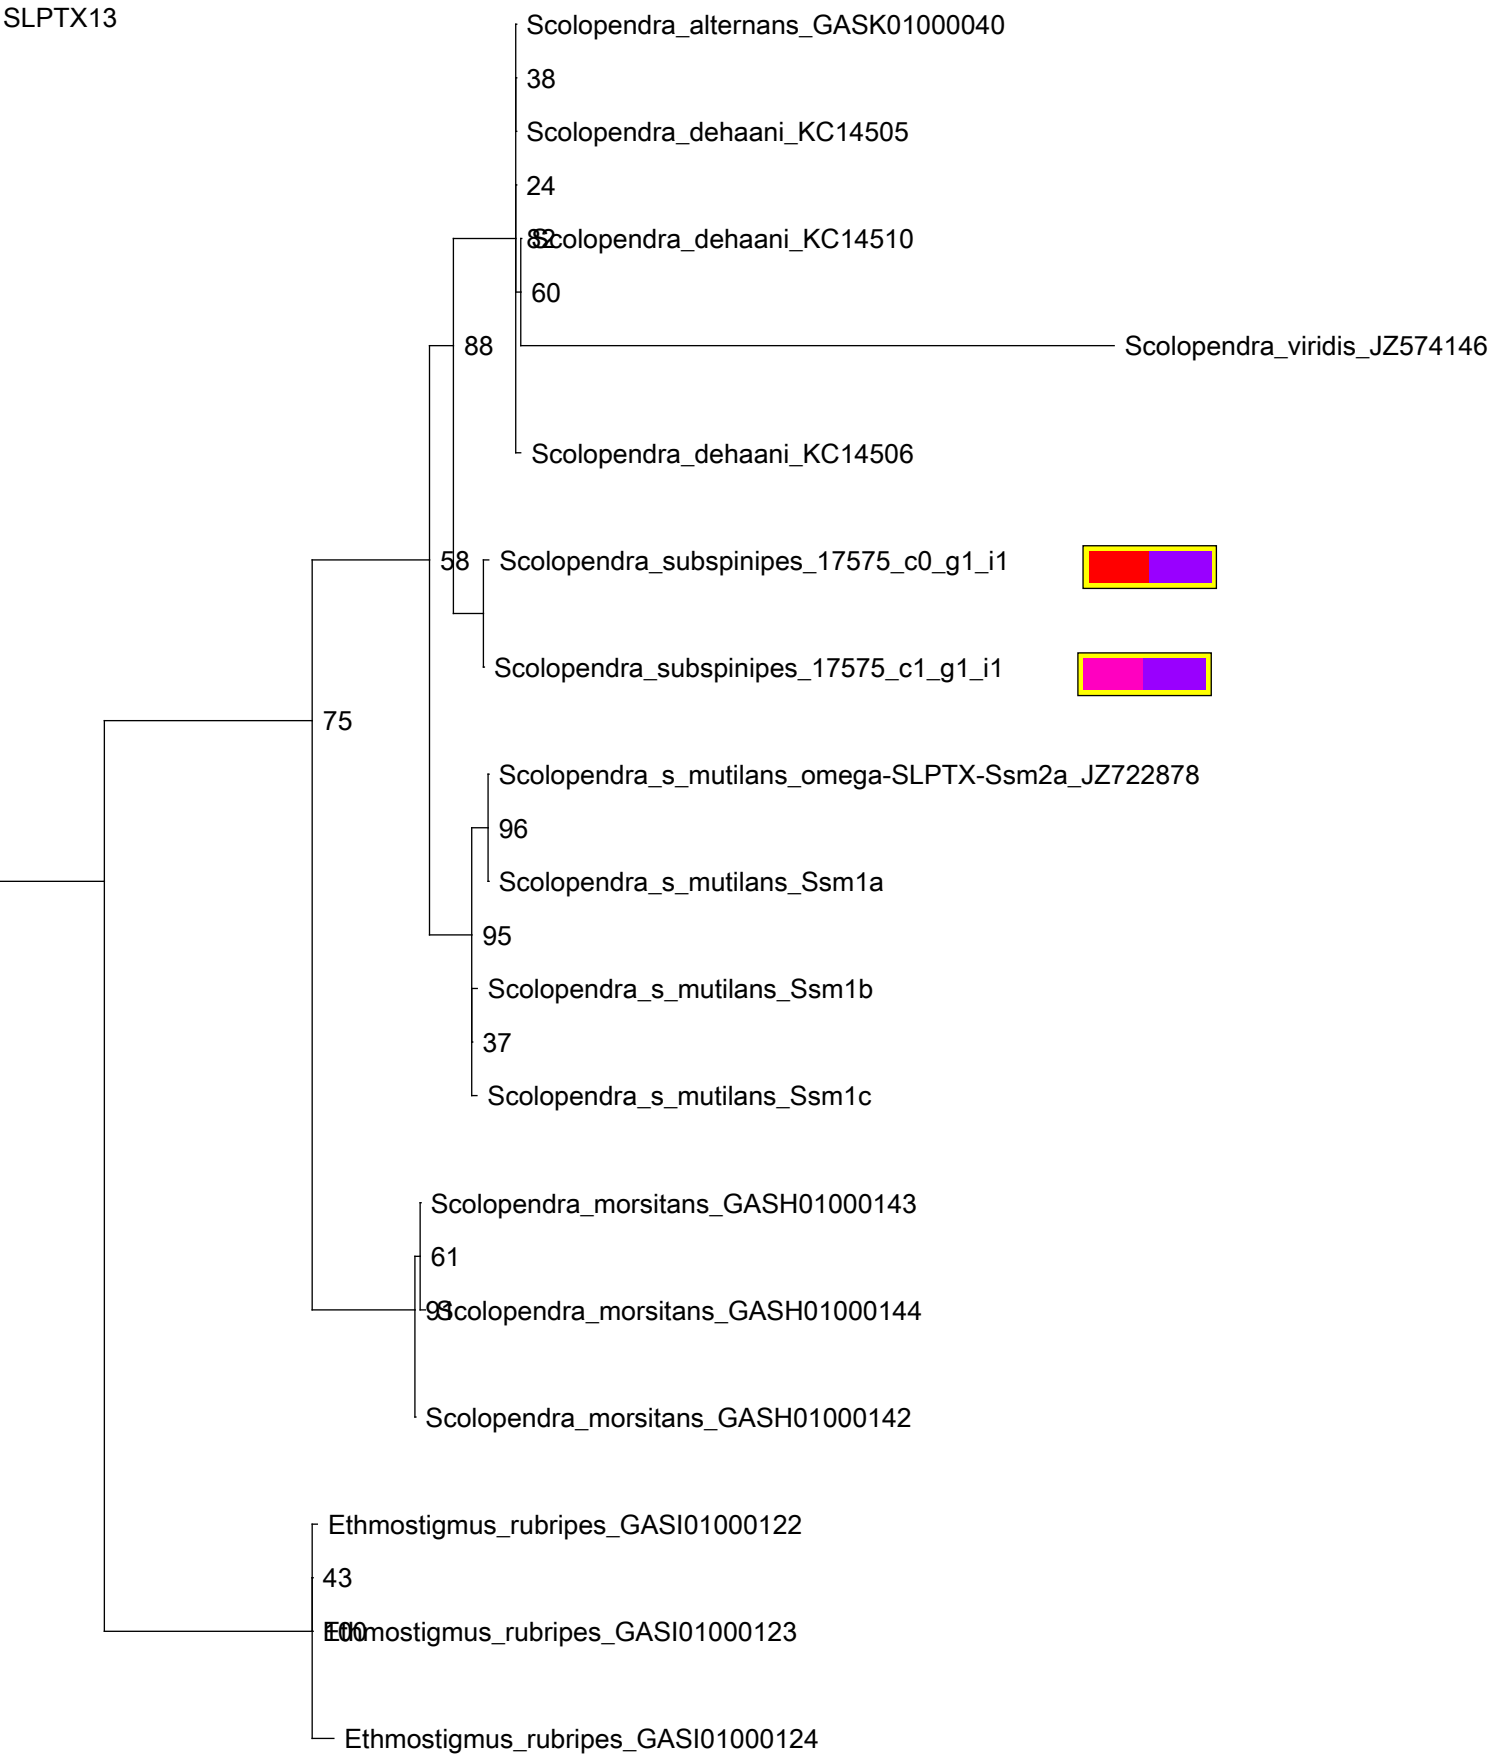

0.1

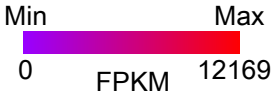

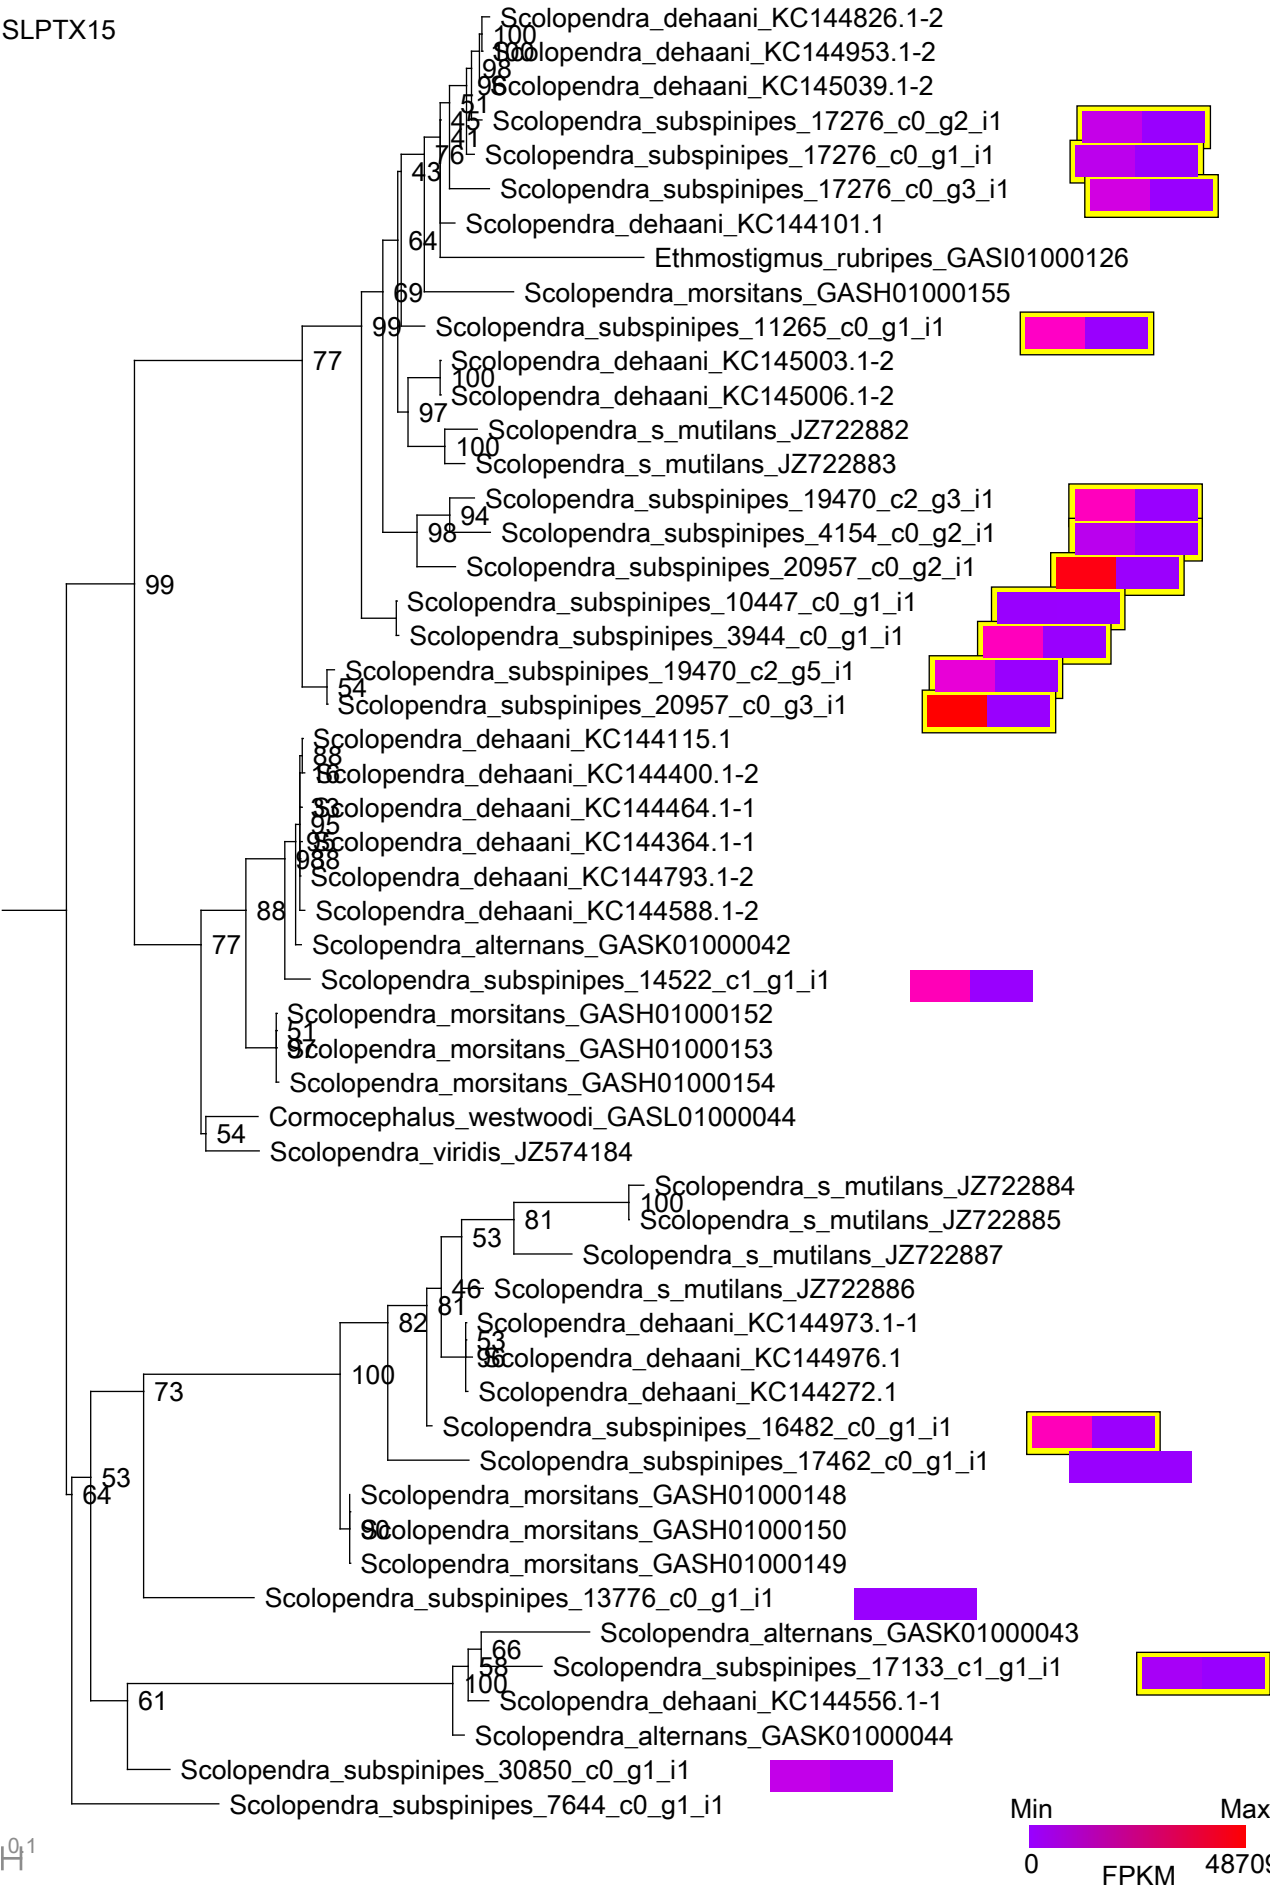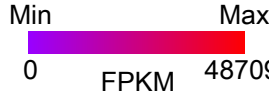

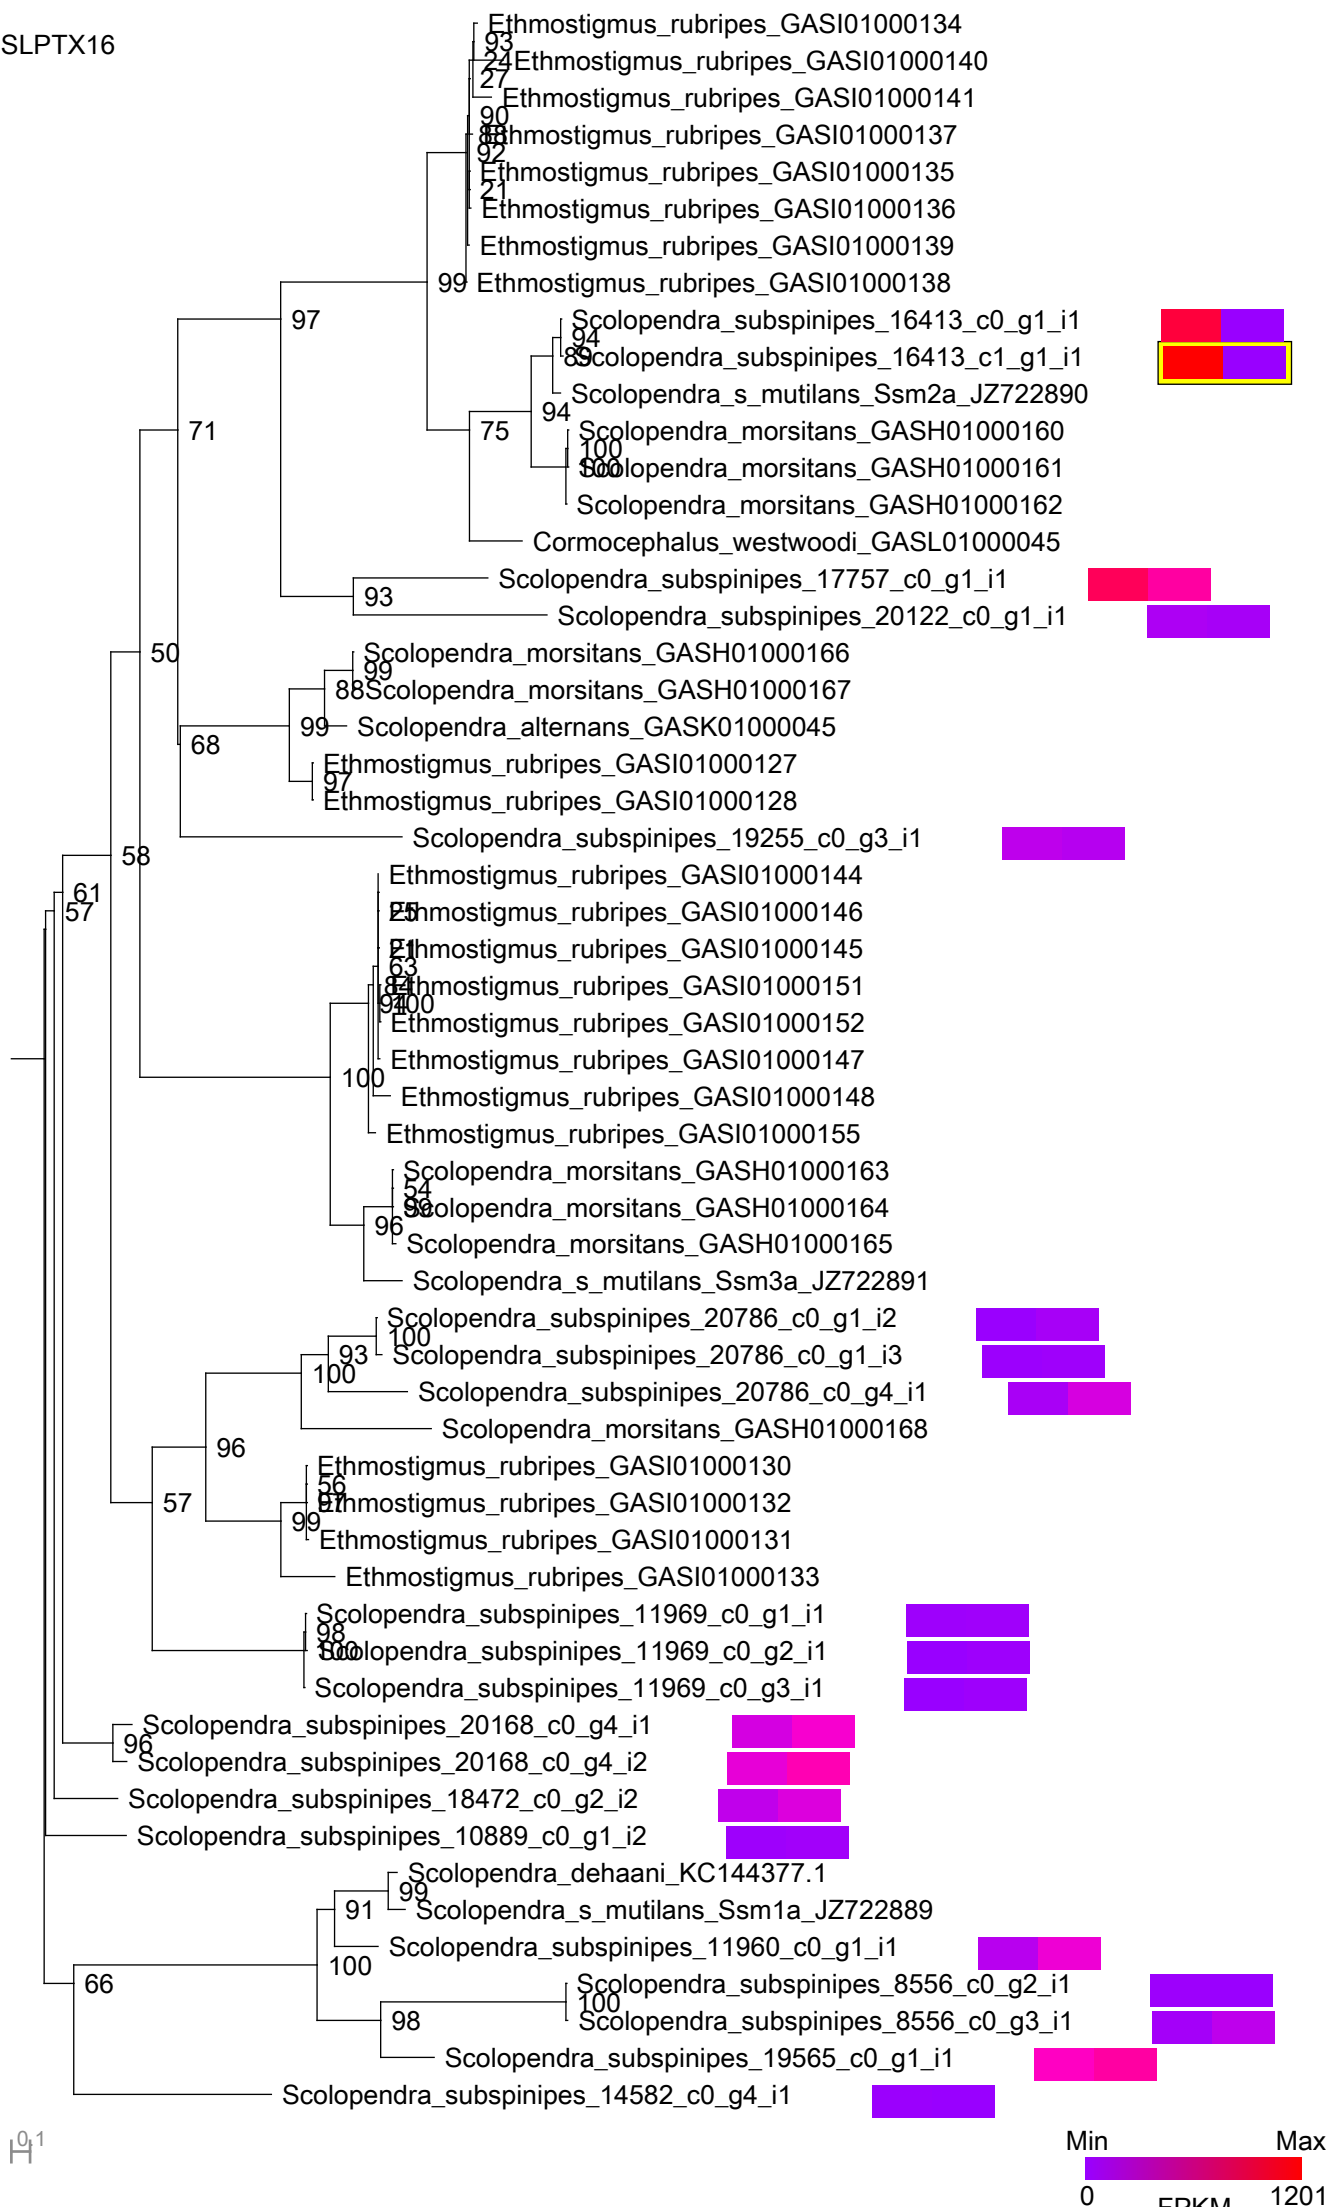

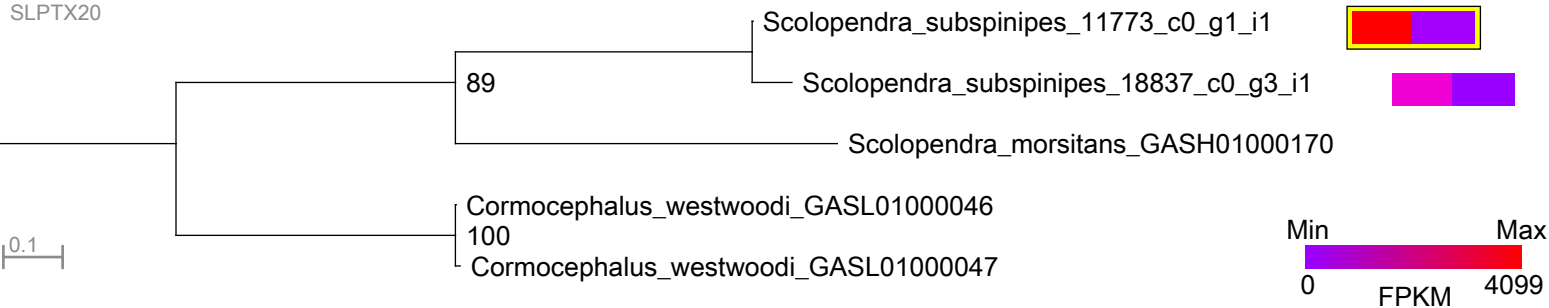

Transferrin

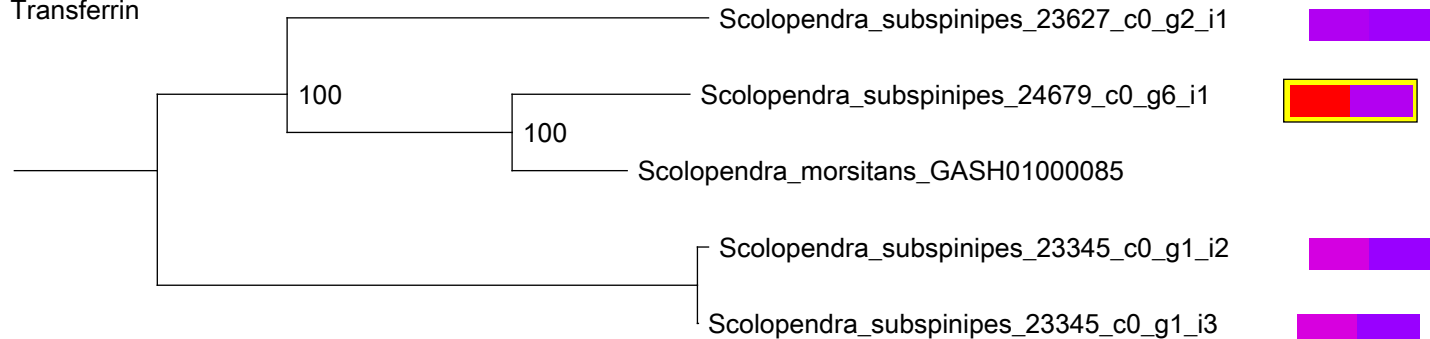

0.1

Min Max  
0 256  
FPKM

Uncharacterised10

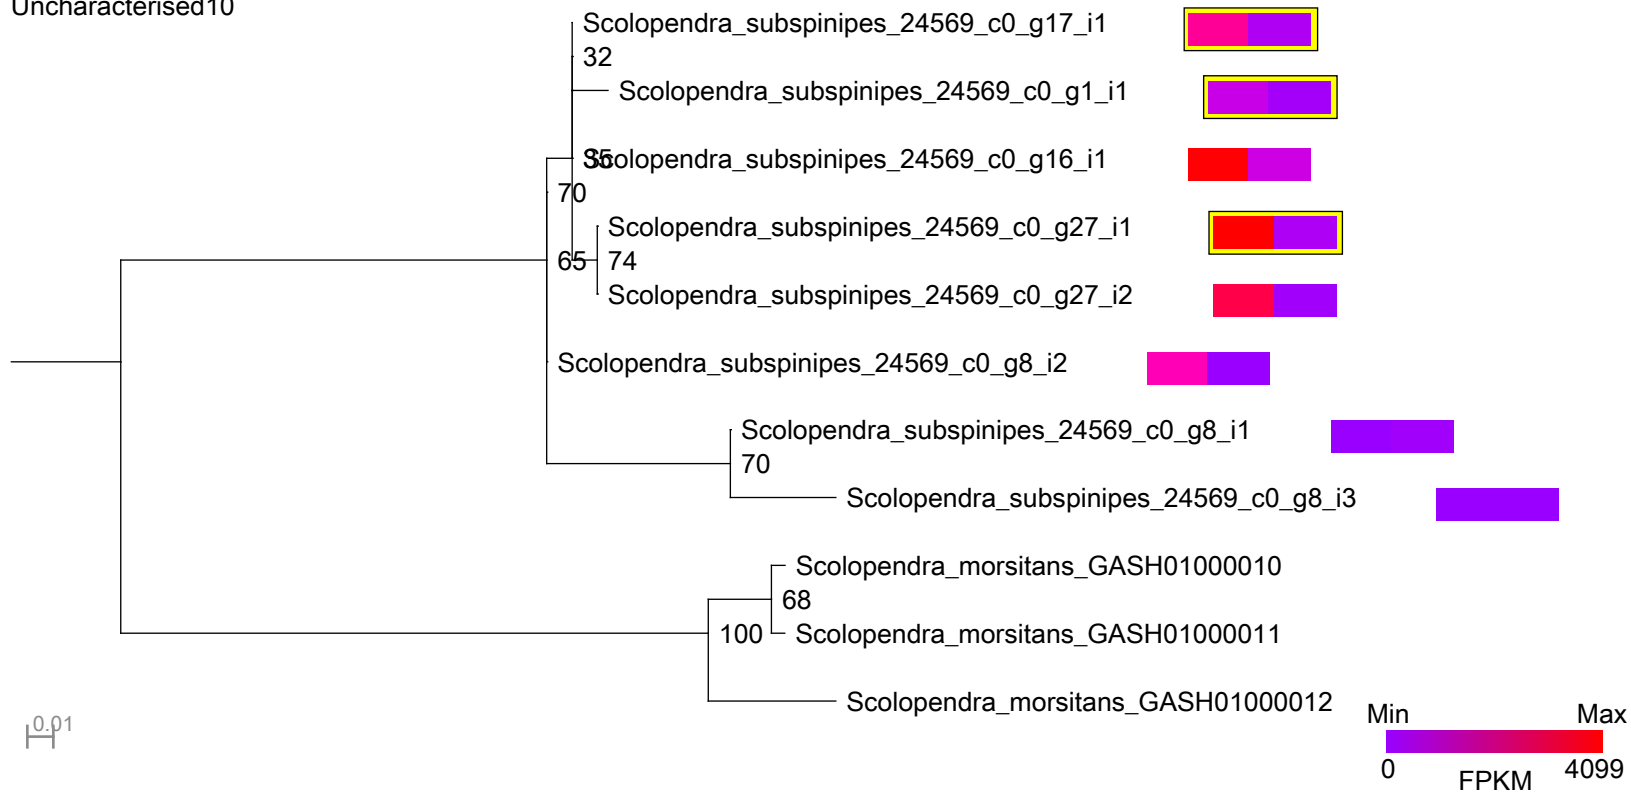



Uncharacterised11

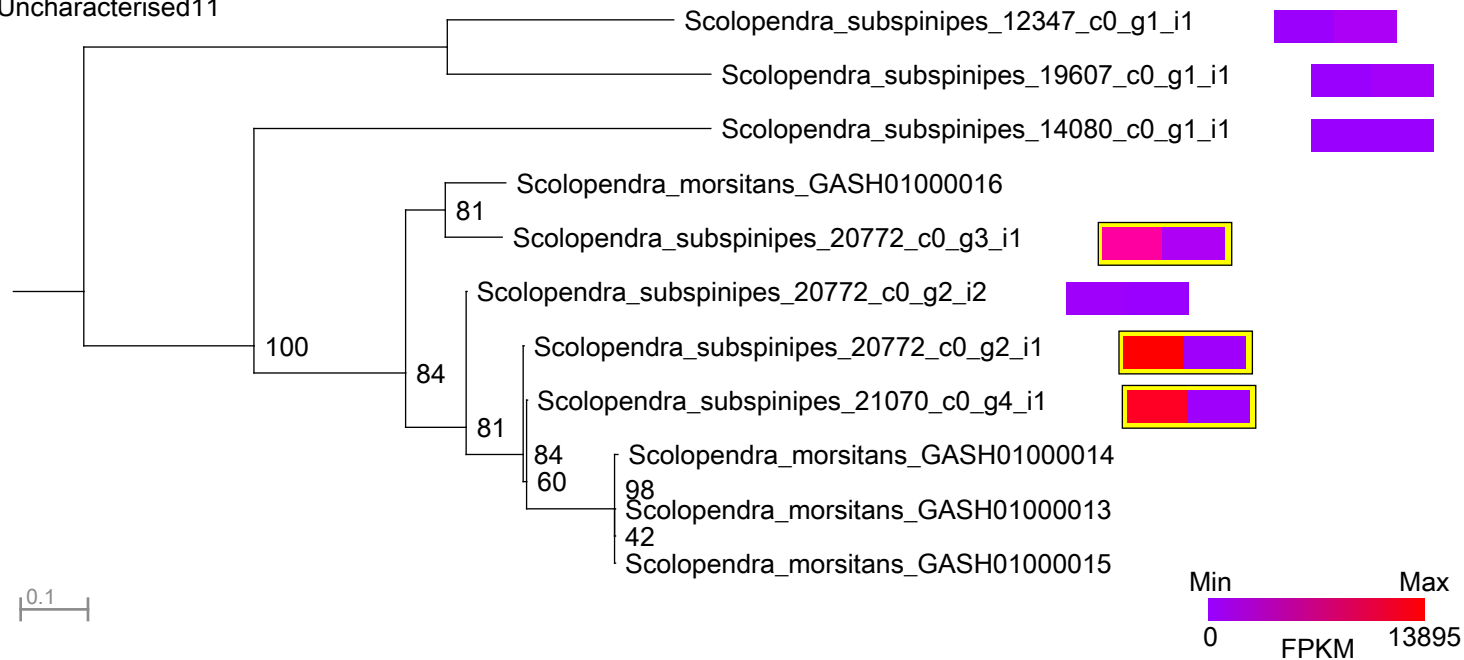

Novel2

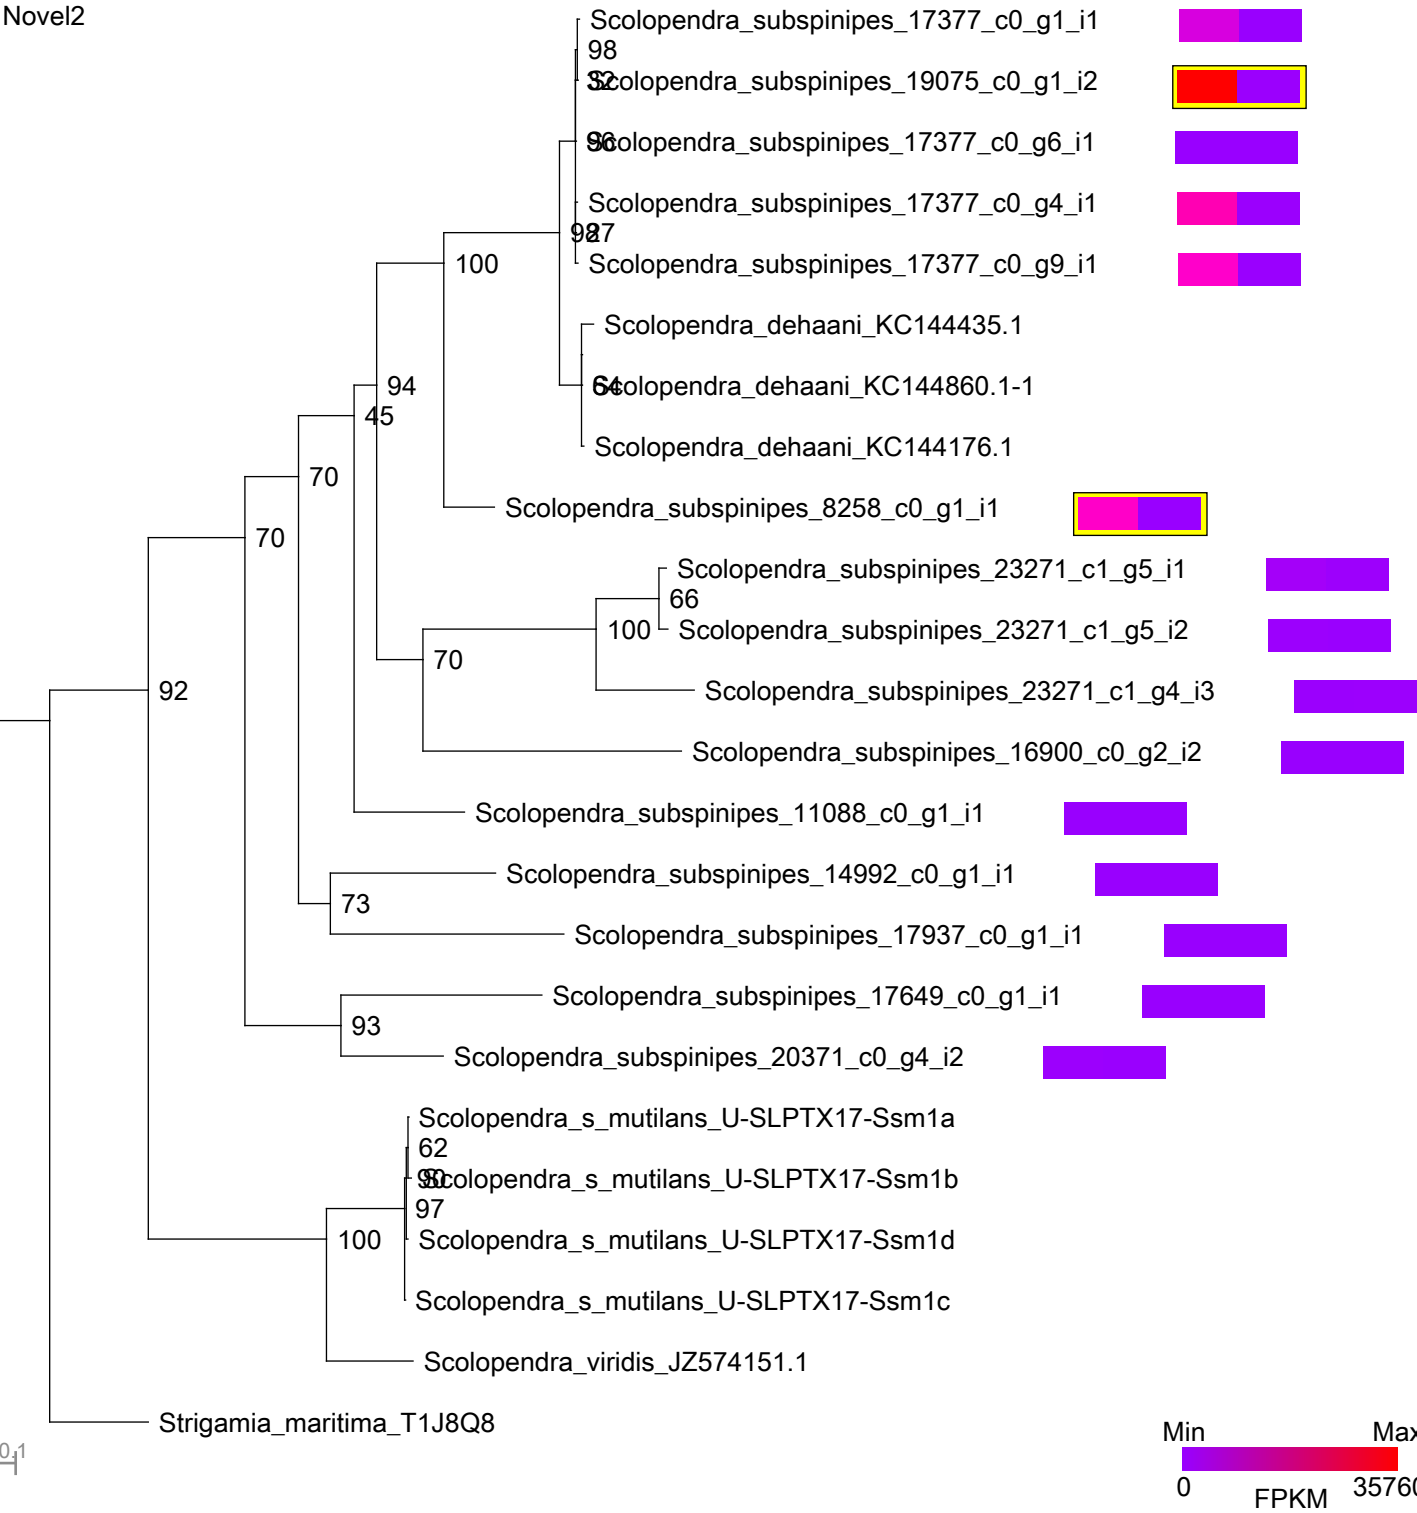

Novel4

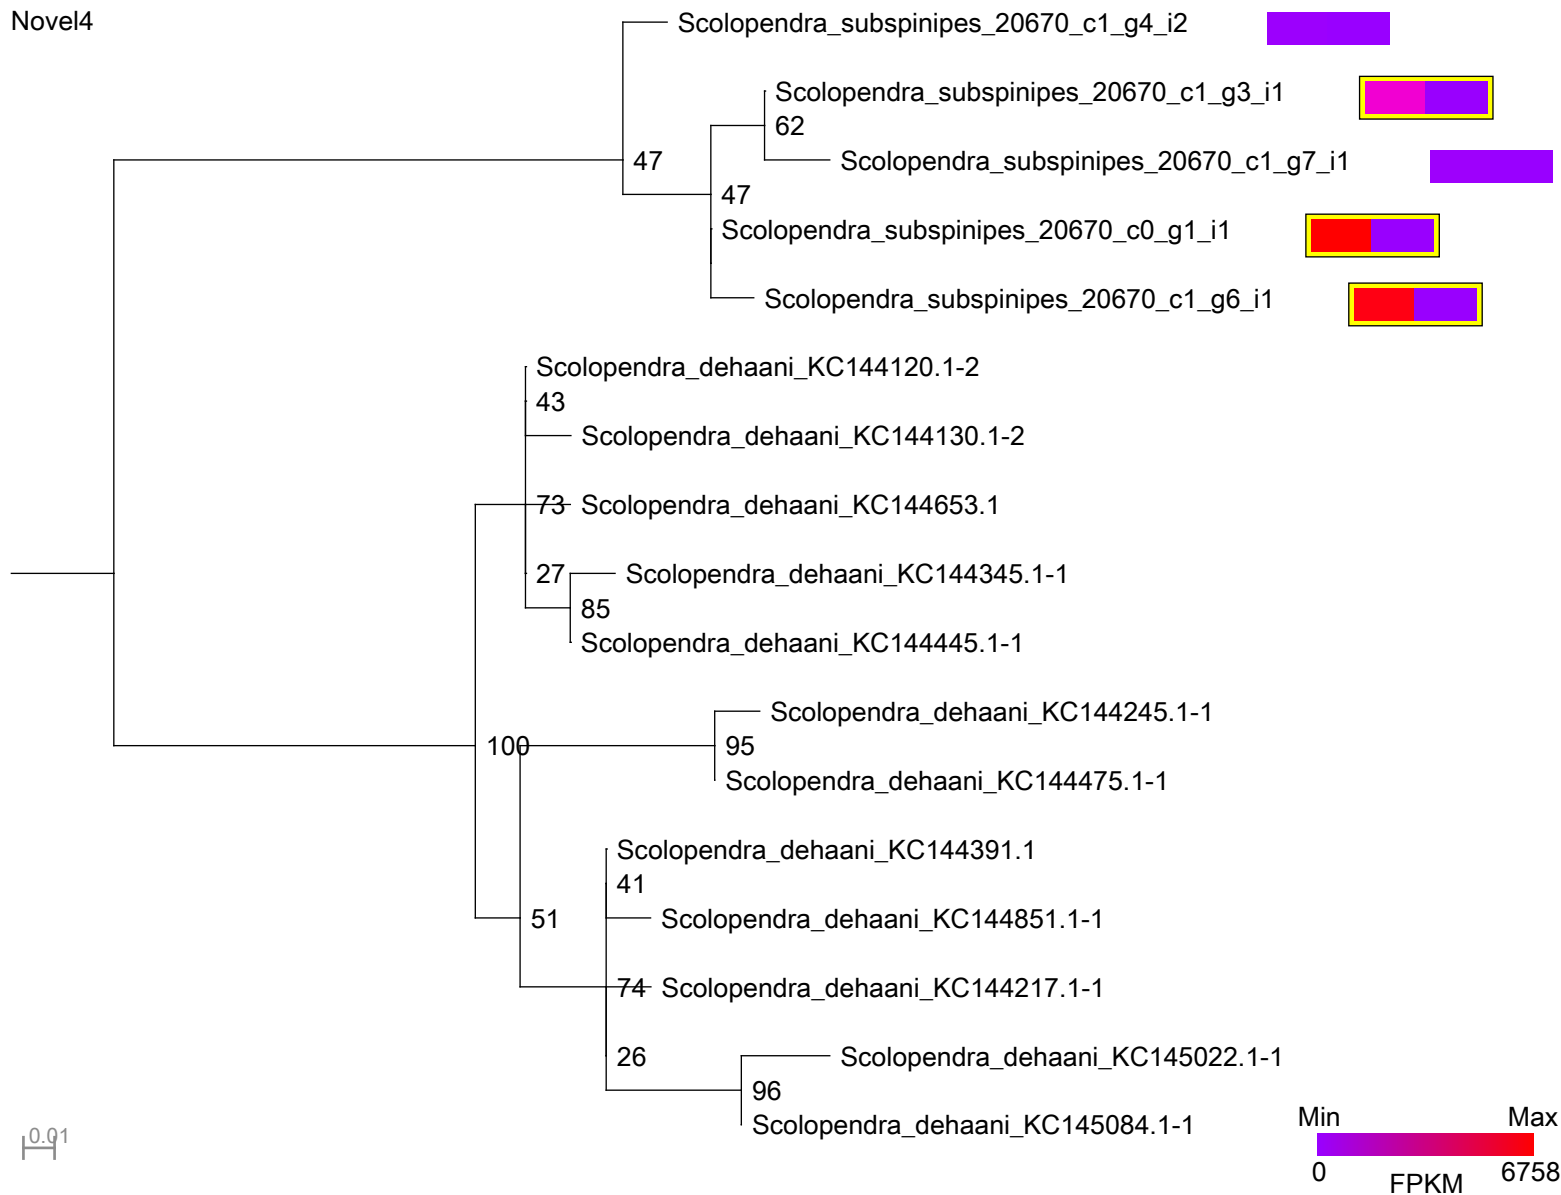

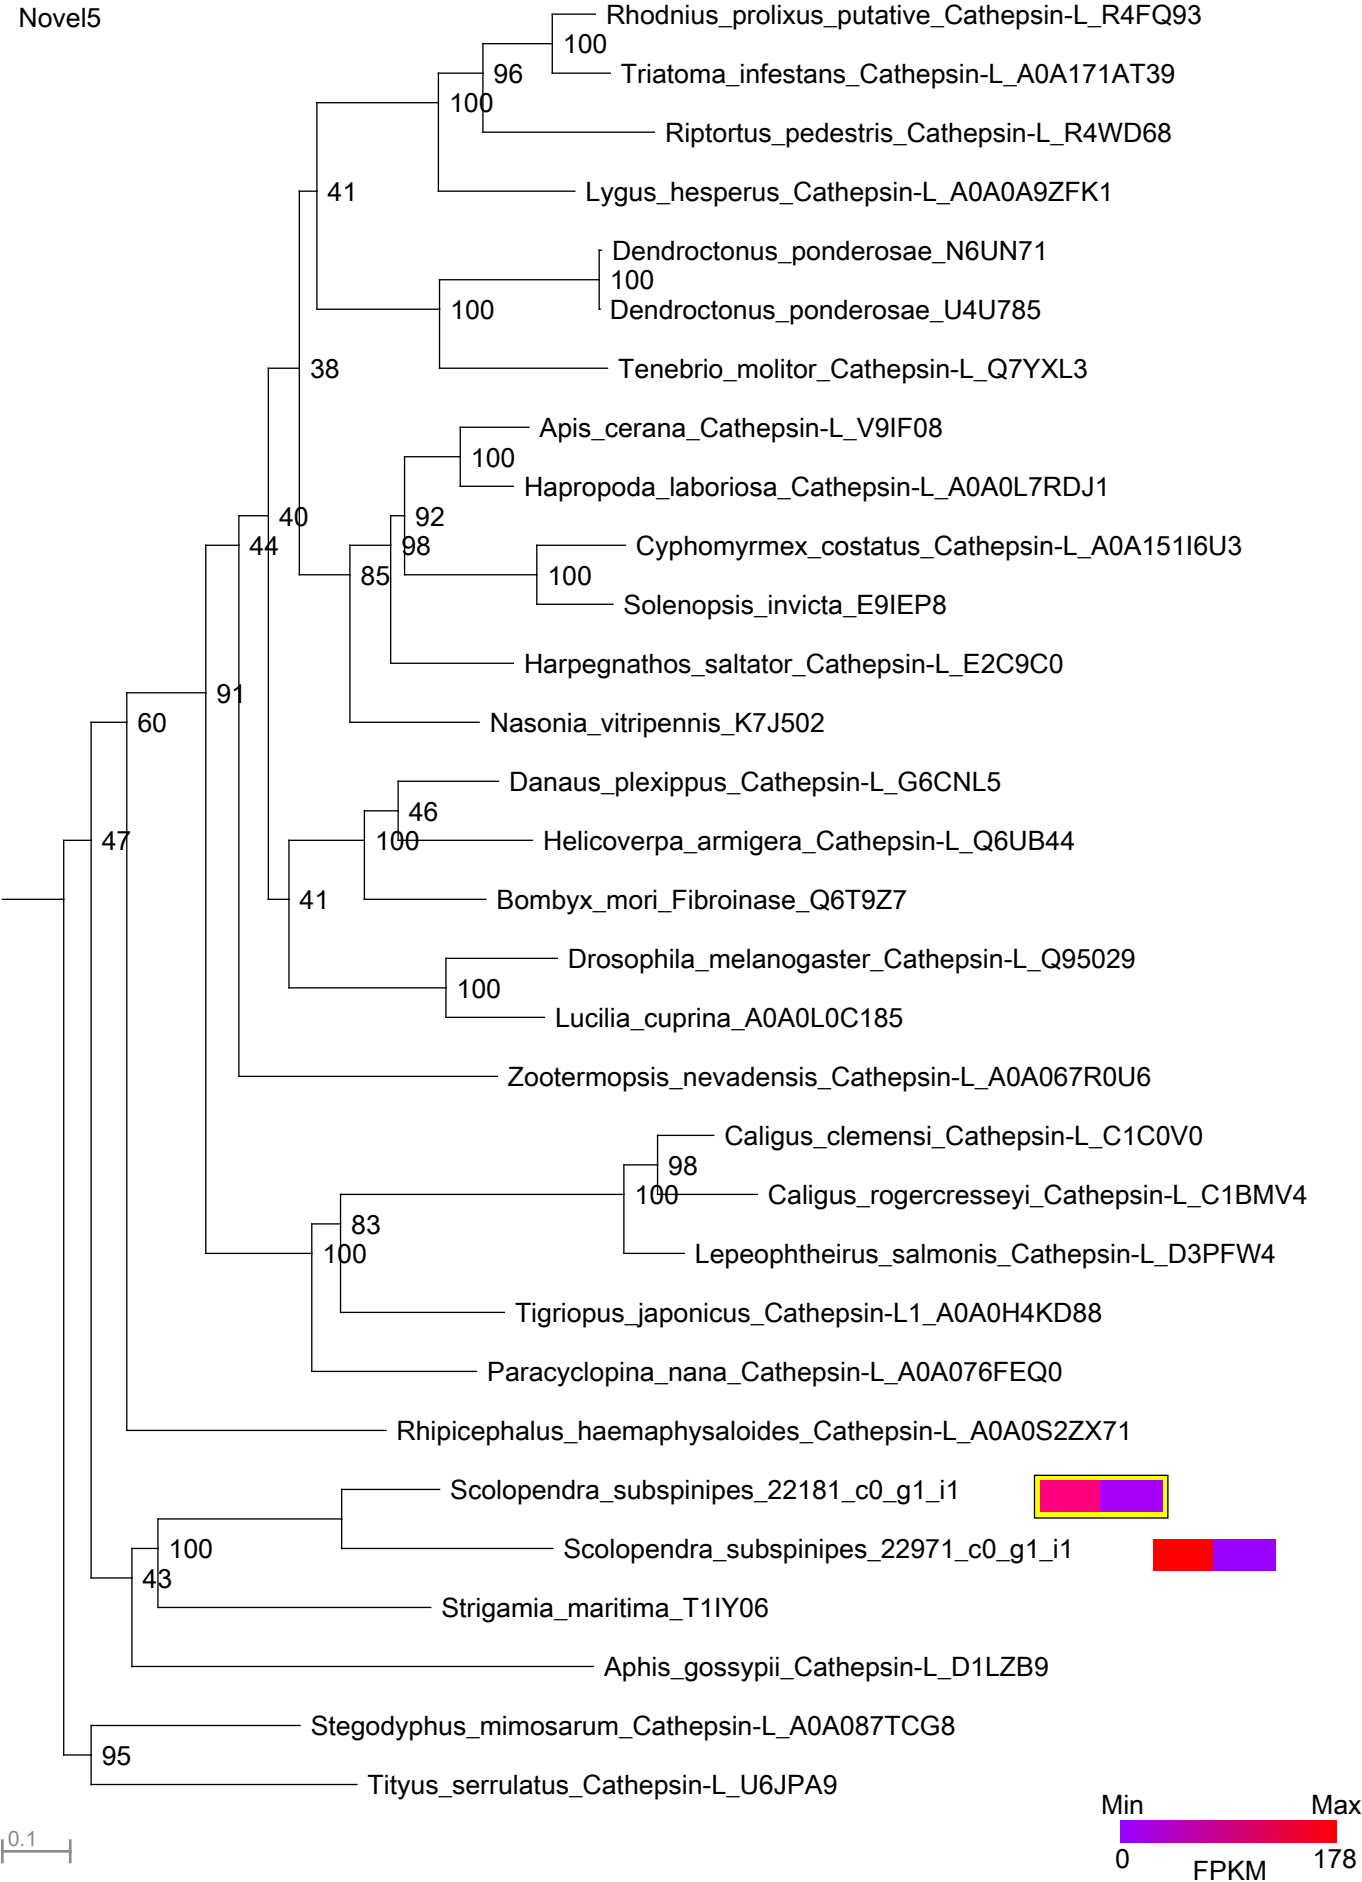

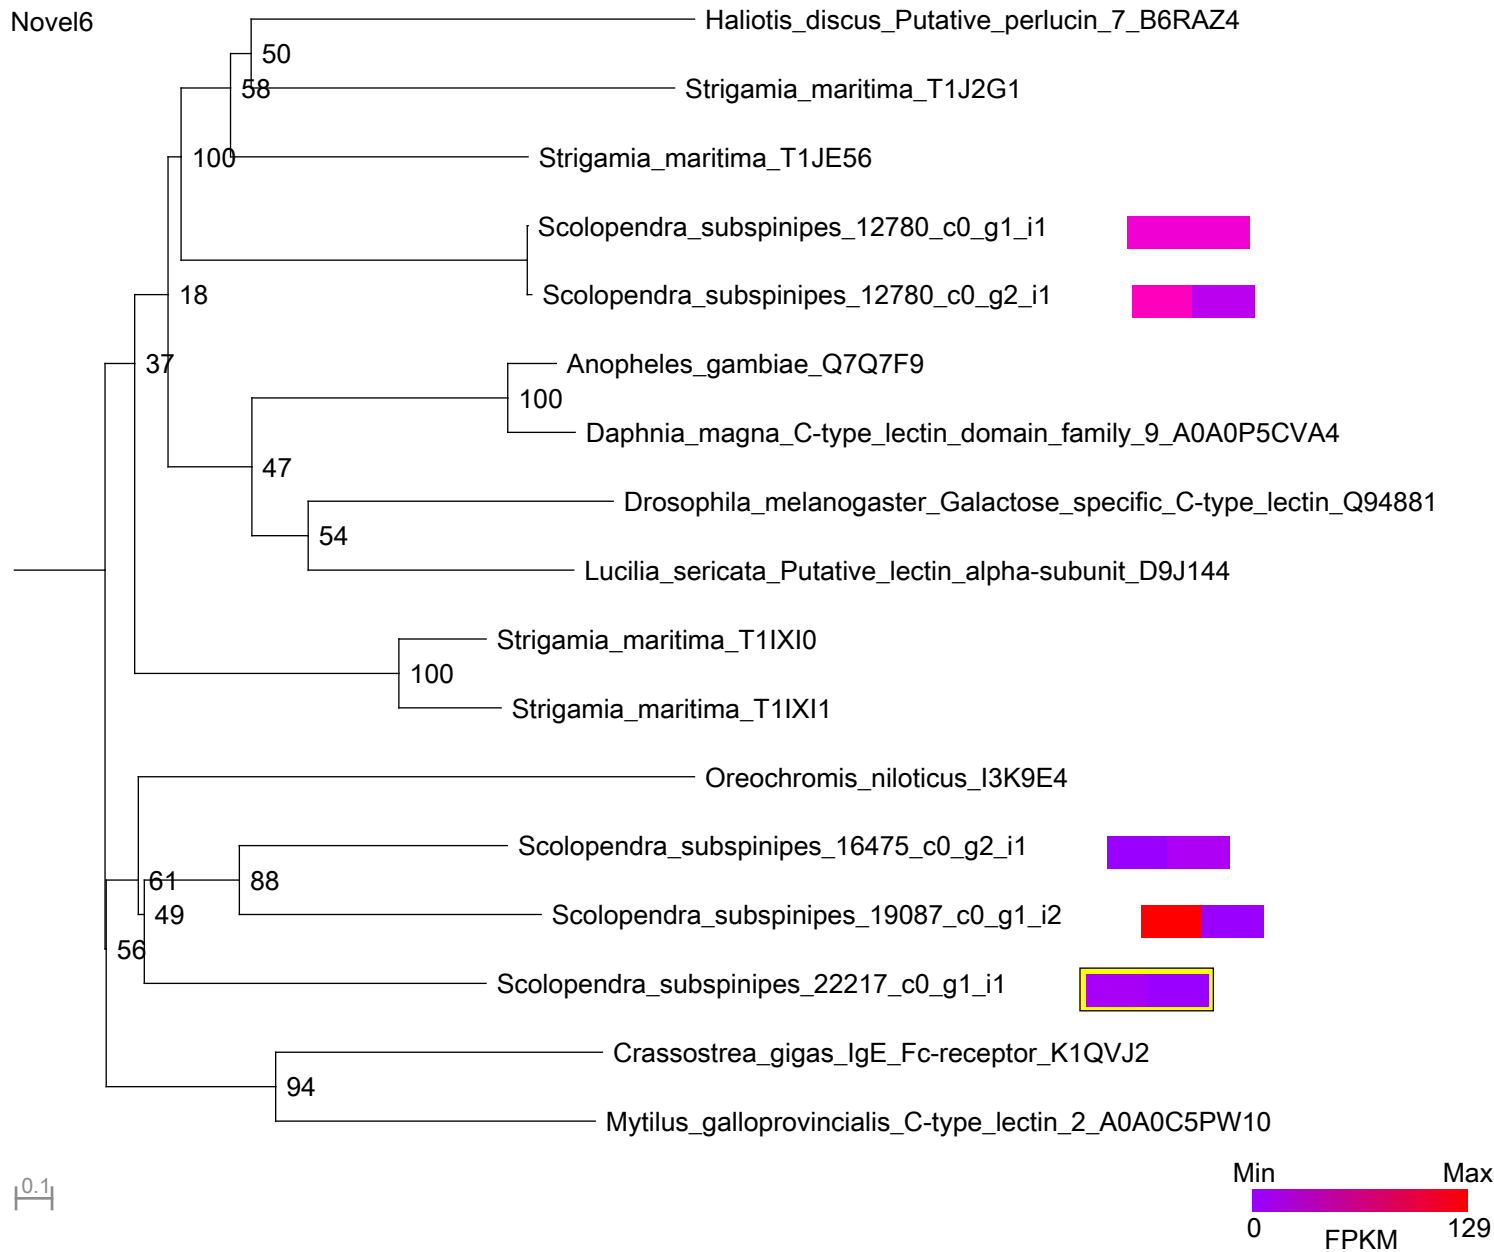

Supplement: s1 [file s1]
