# Supplementary material for: True Lies: Using Proteomics to Assess the Accuracy of Transcriptome-Based Venomics in Centipedes Uncovers False Positives and Reveals Startling Intraspecific Variation in Scolopendra subspinipes
Source: MDPI journal article supplement (doi:10.3390/toxins10030096), 2018-02-28
Supplement: s1 [file s1]

TABLE S1: Putative and identified toxins, expression values, proteomic detection and completeness of ORF

| Family                                                               | Contig           | VG FPKM | Muscle FPKM | Proteome | Species | Lineage | ToxProt | Complete |
|----------------------------------------------------------------------|------------------|---------|-------------|----------|---------|---------|---------|----------|
|                                                                      |                  |         |             | e        | BLAST   | BLAST   | BLAST   | ORF      |
| Alpha-latrotoxin-Lh1a (Alpha-LTX-Lh1a) (Alpha-latrotoxin) (Fragment) | TR21806 c0_g1_i1 | 14.253  | 7.253       | 0        | 0       | 0       | 1       | N        |
| BPFTx                                                                | TR1482 c0_g1_i1  | 636.523 | 0.001       | 0        | 0       | 1       | 0       | N        |
| BPFTx                                                                | TR14903 c0_g1_i1 | 526.626 | 0.177       | 1        | 1       | 1       | 0       | Y        |
| BPFTx                                                                | TR15132 c0_g1_i1 | 160.53  | 0.001       | 0        | 1       | 1       | 0       | N        |
| BPFTx                                                                | TR15180 c0_g1_i1 | 798.512 | 0.177       | 1        | 1       | 1       | 0       | Y        |
| BPFTx                                                                | TR16730 c0_g1_i1 | 928.508 | 2.311       | 0        | 0       | 1       | 0       | Y        |
| BPFTx                                                                | TR17938 c0_g1_i1 | 1077.94 | 1.535       | 0        | 1       | 1       | 0       | N        |
| BPFTx                                                                | TR18366 c0_g1_i1 | 1172.68 | 3.415       | 1        | 1       | 1       | 0       | Y        |
| BPFTx                                                                | TR20170 c1_g1_i1 | 4098.79 | 7.953       | 1        | 1       | 1       | 0       | Y        |
| BPFTx                                                                | TR20255 c0_g1_i1 | 381.867 | 5.692       | 1        | 1       | 1       | 0       | Y        |
| BPFTx                                                                | TR20502 c0_g2_i1 | 683.35  | 7.868       | 1        | 1       | 1       | 0       | N        |
| BPFTx                                                                | TR21242 c0_g1_i1 | 1015.22 | 0.894       | 0        | 1       | 1       | 0       | Y        |
| BPFTx                                                                | TR21868 c2_g1_i1 | 1499.22 | 4.579       | 1        | 1       | 1       | 0       | Y        |
| BPFTx                                                                | TR22070 c0_g1_i1 | 1108.45 | 3.289       | 1        | 1       | 1       | 0       | Y        |
| BPFTx                                                                | TR22084 c0_g1_i1 | 133.198 | 1.931       | 1        | 1       | 1       | 0       | Y        |
| BPFTx                                                                | TR22530 c0_g2_i2 | 2.881   | 0.008       | 0        | 0       | 1       | 0       | Y        |
| BPFTx                                                                | TR23186 c0_g3_i1 | 284.74  | 1.729       | 0        | 1       | 1       | 0       | N        |
| BPFTx                                                                | TR23186 c0_g3_i2 | 392.396 | 0.582       | 0        | 1       | 1       | 0       | N        |
| BPFTx                                                                | TR23314 c3_g2_i1 | 744.381 | 3.281       | 1        | 1       | 1       | 0       | Y        |
| BPFTx                                                                | TR23314 c3_g2_i2 | 791.682 | 1.383       | 1        | 1       | 1       | 0       | Y        |
| BPFTx                                                                | TR23314 c3_g3_i1 | 1093.73 | 2.294       | 1        | 1       | 1       | 0       | Y        |
| BPFTx                                                                | TR23538 c1_g1_i1 | 164.052 | 4.158       | 1        | 1       | 1       | 0       | N        |
| BPFTx                                                                | TR23538 c1_g5_i1 | 433.329 | 8.324       | 1        | 1       | 1       | 0       | N        |
| BPFTx                                                                | TR23538 c1_g6_i1 | 1545.09 | 1.063       | 1        | 1       | 1       | 0       | N        |
| BPFTx                                                                | TR23549 c0_g3_i1 | 352.127 | 0.001       | 1        | 1       | 1       | 0       | N        |
| BPFTx                                                                | TR23549 c0_g3_i2 | 659.859 | 0.843       | 1        | 1       | 1       | 0       | N        |
| BPFTx                                                                | TR23549 c0_g3_i3 | 928.864 | 2.8         | 1        | 1       | 1       | 0       | Y        |
| BPFTx                                                                | TR24015 c0_g1_i1 | 272.787 | 0.001       | 0        | 1       | 1       | 0       | Y        |
| BPFTx                                                                | TR24015 c0_g1_i2 | 77.182  | 0.001       | 0        | 1       | 1       | 0       | Y        |
| BPFTx                                                                | TR24015 c0_g1_i3 | 173.064 | 5.515       | 1        | 1       | 1       | 0       | N        |
| BPFTx                                                                | TR24015 c0_g1_i4 | 111.463 | 0.001       | 1        | 1       | 1       | 0       | Y        |
| BPFTx                                                                | TR24015 c0_g1_i5 | 2.668   | 0.001       | 1        | 1       | 1       | 0       | N        |
| BPFTx                                                                | TR24015 c0_g1_i6 | 231.76  | 2.37        | 0        | 1       | 1       | 0       | Y        |
| BPFTx                                                                | TR24015 c0_g1_i7 | 0.001   | 0.001       | 1        | 1       | 1       | 0       | N        |
| BPFTx                                                                | TR24015 c0_g1_i8 | 484.59  | 3.618       | 1        | 1       | 1       | 0       | Y        |
| BPFTx                                                                | TR24015 c0_g1_i9 | 402.226 | 5.726       | 1        | 1       | 1       | 0       | Y        |
| BPFTx                                                                | TR24172 c0_g1_i1 | 969.275 | 5.507       | 1        | 1       | 1       | 0       | Y        |
| BPFTx                                                                | TR24172 c0_g1_i2 | 139.886 | 0.422       | 1        | 1       | 1       | 0       | Y        |
| BPFTx                                                                | TR24172 c0_g1_i3 | 49.21   | 0.001       | 1        | 1       | 1       | 0       | N        |
| BPFTx                                                                | TR24172 c0_g1_i4 | 452.479 | 5.195       | 1        | 1       | 1       | 0       | N        |

|                                                      |                   |         |        |   |   |   |   |   |
|------------------------------------------------------|-------------------|---------|--------|---|---|---|---|---|
| BPFTx                                                | TR24172 c0_g1_i5  | 1.34    | 0.001  | 1 | 1 | 1 | 0 | N |
| BPFTx                                                | TR24172 c0_g1_i6  | 451.329 | 6.131  | 1 | 1 | 1 | 0 | N |
| BPFTx                                                | TR24172 c0_g1_i7  | 375.867 | 0.001  | 1 | 1 | 1 | 0 | N |
| BPFTx                                                | TR24403 c1_g1_i1  | 125.016 | 10.525 | 0 | 0 | 1 | 0 | N |
| BPFTx                                                | TR24403 c1_g2_i2  | 3427.34 | 14.058 | 1 | 1 | 1 | 0 | N |
| BPFTx                                                | TR24403 c1_g6_i1  | 635.919 | 21.05  | 0 | 0 | 1 | 0 | N |
| BPFTx                                                | TR24598 c0_g10_i1 | 657.298 | 0.001  | 1 | 1 | 1 | 0 | N |
| BPFTx                                                | TR24598 c0_g19_i1 | 323.574 | 0.001  | 0 | 0 | 1 | 0 | N |
| BPFTx                                                | TR24598 c0_g20_i1 | 46.008  | 0.001  | 0 | 0 | 1 | 0 | N |
| BPFTx                                                | TR24598 c0_g7_i1  | 595.721 | 16.833 | 1 | 1 | 0 | 0 | N |
| BPFTx                                                | TR994 c0_g1_i1    | 0.001   | 0      | 0 | 1 | 0 | 0 | N |
| C-type Lectin                                        | TR11675 c0_g1_i1  | 0.001   | 3.736  | 0 | 0 | 0 | 1 | Y |
| C-type Lectin                                        | TR11675 c0_g3_i1  | 1.079   | 1.864  | 0 | 0 | 0 | 1 | Y |
| C-type Lectin                                        | TR12780 c0_g2_i1  | 28.613  | 6.89   | 0 | 1 | 0 | 1 | Y |
| C-type Lectin                                        | TR14907 c0_g2_i1  | 1.352   | 3.871  | 0 | 1 | 0 | 0 | Y |
| C-type Lectin                                        | TR16475 c0_g2_i1  | 0.001   | 4.267  | 0 | 1 | 0 | 1 | N |
| C-type Lectin                                        | TR18573 c0_g1_i1  | 39.676  | 3.93   | 0 | 1 | 0 | 1 | Y |
| C-type Lectin                                        | TR19087 c0_g1_i2  | 129.392 | 0.261  | 0 | 1 | 0 | 1 | Y |
| C-type Lectin                                        | TR21453 c0_g1_i1  | 13.447  | 5.448  | 0 | 0 | 0 | 1 | Y |
| C-type Lectin                                        | TR22217 c0_g1_i1  | 3.154   | 0.001  | 1 | 1 | 0 | 1 | Y |
| C-type Lectin                                        | TR22217 c0_g1_i2  | 3.154   | 0.001  | 1 | 1 | 0 | 0 | Y |
| C-type Lectin                                        | TR3201 c0_g2_i1   | 1.447   | 0.001  | 0 | 0 | 0 | 1 | Y |
| C-type Lectin                                        | TR9820 c0_g1_i1   | 21.134  | 0      | 0 | 0 | 1 | 1 | Y |
| C-type lectin galactose-binding isoform (CTL) (Venom |                   |         |        |   |   |   |   |   |
| C-type lectin galactose binding isoform)             | TR13111 c0_g1_i1  | 1.802   | 1.628  | 0 | 0 | 0 | 1 | N |
| C-type lectin galactose-binding isoform (CTL) (Venom |                   |         |        |   |   |   |   |   |
| C-type lectin galactose binding isoform)             | TR7841 c0_g1_i1   | 5.229   | 1.611  | 0 | 0 | 0 | 1 | Y |
| C-type lectin lectoxin-Enh6 (CTL)                    | TR17884 c0_g2_i1  | 7.708   | 6.165  | 0 | 0 | 0 | 1 | Y |
| C-type lectin lectoxin-Lio1 (CTL)                    | TR3201 c0_g1_i1   | 0.001   | 1.855  | 0 | 0 | 0 | 1 | N |
| C-type lectin lectoxin-Phi1 (CTL)                    | TR11675 c0_g2_i1  | 0.001   | 9.353  | 0 | 0 | 0 | 1 | Y |
| C-type lectin mannose-binding isoform (CTL) (Venom   |                   |         |        |   |   |   |   |   |
| C-type lectin mannose-binding isoform 1)             | TR21502 c0_g1_i1  | 10.055  | 5.465  | 0 | 0 | 0 | 1 | Y |
| C-type lectin TsL (Galactose-binding lectin) (CTL)   | TR23607 c2_g1_i2  | 2.289   | 1.096  | 0 | 0 | 0 | 1 | N |
| CAP                                                  | TR11262 c0_g1_i1  | 0.001   | 0.001  | 1 | 1 | 1 | 1 | N |
| CAP                                                  | TR12732 c0_g3_i1  | 4.945   | 0.001  | 0 | 1 | 1 | 1 | N |
| CAP                                                  | TR13866 c0_g1_i1  | 4.126   | 2.353  | 0 | 1 | 1 | 1 | Y |
| CAP                                                  | TR18570 c0_g2_i1  | 59.016  | 0.001  | 1 | 1 | 1 | 1 | Y |
| CAP                                                  | TR19492 c0_g1_i1  | 175.518 | 0.945  | 0 | 1 | 1 | 1 | Y |
| CAP                                                  | TR22150 c0_g1_i3  | 10.613  | 3.272  | 0 | 1 | 1 | 1 | Y |
| CAP                                                  | TR23597 c1_g4_i2  | 89.253  | 0.001  | 1 | 1 | 1 | 1 | N |

|                                                                                                                                                 |                   |         |        |   |   |   |   |   |
|-------------------------------------------------------------------------------------------------------------------------------------------------|-------------------|---------|--------|---|---|---|---|---|
| CAP                                                                                                                                             | TR23597 c1_g5_i1  | 2683.6  | 7.379  | 1 | 1 | 1 | 1 | N |
| CAP                                                                                                                                             | TR23597 c1_g8_i1  | 4126.56 | 6.688  | 1 | 1 | 1 | 1 | N |
| CAP                                                                                                                                             | TR23597 c1_g8_i3  | 2345.15 | 0.001  | 1 | 1 | 1 | 1 | N |
| CAP                                                                                                                                             | TR23597 c1_g9_i1  | 2466.08 | 0.001  | 1 | 1 | 1 | 1 | N |
| CAP                                                                                                                                             | TR24670 c2_g10_i1 | 4857.67 | 5.499  | 1 | 1 | 1 | 1 | N |
| CAP                                                                                                                                             | TR24670 c2_g2_i1  | 3.51    | 0.001  | 1 | 1 | 1 | 1 | N |
| CAP                                                                                                                                             | TR24670 c2_g20_i1 | 8865.57 | 12.945 | 1 | 1 | 1 | 1 | N |
| CAP                                                                                                                                             | TR24670 c2_g21_i1 | 859.046 | 13.19  | 1 | 1 | 1 | 1 | N |
| CAP                                                                                                                                             | TR24670 c2_g24_i1 | 68.324  | 2.032  | 1 | 1 | 1 | 1 | Y |
| CAP1                                                                                                                                            | TR11262 c0_g3_i1  | 67.53   | 16.411 | 1 | 1 | 1 | 1 | N |
| CAP1                                                                                                                                            | TR11262 c0_g4_i1  | 11.656  | 2.842  | 1 | 1 | 1 | 1 | N |
| CAP1                                                                                                                                            | TR12732 c0_g1_i1  | 3.296   | 0.759  | 0 | 1 | 1 | 1 | N |
| CAP1                                                                                                                                            | TR18551 c0_g1_i1  | 362.218 | 6.932  | 1 | 1 | 1 | 1 | Y |
| CAP1                                                                                                                                            | TR23597 c1_g9_i2  | 0.001   | 0.001  | 1 | 1 | 1 | 1 | N |
| CAP2                                                                                                                                            | TR11262 c0_g2_i1  | 51.166  | 21.539 | 1 | 1 | 1 | 1 | N |
| CAP2                                                                                                                                            | TR17674 c0_g1_i1  | 3008.82 | 1.24   | 1 | 1 | 1 | 1 | Y |
| CAP2                                                                                                                                            | TR22150 c0_g1_i1  | 1.15    | 19.692 | 0 | 1 | 1 | 1 | Y |
| CAP2                                                                                                                                            | TR22150 c0_g1_i2  | 10.115  | 3.146  | 0 | 1 | 1 | 1 | Y |
| CAP2                                                                                                                                            | TR23597 c1_g1_i1  | 1809.41 | 19.017 | 1 | 1 | 1 | 1 | N |
| CAP2                                                                                                                                            | TR23597 c1_g4_i1  | 2114.93 | 8.863  | 1 | 1 | 1 | 1 | N |
| CAP2                                                                                                                                            | TR23597 c1_g7_i1  | 6512.92 | 22.837 | 1 | 1 | 1 | 1 | N |
| CAP2                                                                                                                                            | TR24670 c2_g11_i1 | 2122.06 | 0.001  | 1 | 1 | 1 | 1 | N |
| CAP2                                                                                                                                            | TR24670 c2_g17_i1 | 1771.02 | 5.085  | 1 | 1 | 1 | 1 | N |
| CAP2                                                                                                                                            | TR24670 c2_g23_i1 | 615.689 | 2.741  | 1 | 1 | 1 | 1 | Y |
| CAP2                                                                                                                                            | TR26097 c0_g1_i1  | 6.723   | 3.449  | 0 | 1 | 1 | 1 | N |
| CAP3                                                                                                                                            | TR23597 c1_g9_i3  | 4687.55 | 7.388  | 1 | 1 | 1 | 1 | N |
| Cathepsin                                                                                                                                       | TR20007 c0_g1_i1  | 2.3     | 3.55   | 0 | 1 | 0 | 0 | Y |
| Cathepsin                                                                                                                                       | TR20258 c0_g1_i1  | 10.411  | 5.473  | 0 | 1 | 0 | 0 | Y |
| Cathepsin                                                                                                                                       | TR22181 c0_g1_i1  | 181.649 | 45.498 | 1 | 1 | 0 | 0 | Y |
| Cathepsin                                                                                                                                       | TR22508 c0_g1_i1  | 106.589 | 48.871 | 0 | 1 | 0 | 1 | Y |
| Cathepsin                                                                                                                                       | TR22971 c0_g1_i1  | 263.372 | 32.03  | 0 | 1 | 0 | 0 | Y |
| Cathepsin                                                                                                                                       | TR24330 c0_g2_i1  | 84.475  | 16.15  | 0 | 1 | 0 | 0 | Y |
| Chitinase                                                                                                                                       | TR23222 c0_g1_i1  | 4.494   | 3.255  | 0 | 0 | 1 | 0 | Y |
| Chitinase                                                                                                                                       | TR23781 c0_g1_i1  | 2.443   | 0.784  | 0 | 0 | 1 | 0 | N |
| Chitinase                                                                                                                                       | TR23781 c0_g1_i2  | 16.53   | 4.444  | 0 | 0 | 1 | 0 | Y |
| Coagulation factor V [Cleaved into: Coagulation factor V heavy chain; Coagulation factor V light chain]                                         |                   |         |        |   |   |   |   |   |
|                                                                                                                                                 | TR11000 c0_g1_i1  | 5.739   | 2.007  | 0 | 0 | 0 | 1 | Y |
| Coagulation factor X isoform 2 (PFX2) (EC 3.4.21.6) [Cleaved into: Factor X light chain; Factor X heavy chain; Activated factor Xa heavy chain] |                   |         |        |   |   |   |   |   |
|                                                                                                                                                 | TR23333 c0_g1_i2  | 2.336   | 0.001  | 0 | 0 | 0 | 1 | Y |
| COEsteraseB                                                                                                                                     | TR13080 c0_g1_i1  | 0.001   | 3.854  | 0 | 0 | 0 | 1 | N |
| COEsteraseB                                                                                                                                     | TR16515 c0_g1_i1  | 0.605   | 1.872  | 0 | 0 | 1 | 1 | N |

|                                              |                  |         |        |   |   |   |   |   |
|----------------------------------------------|------------------|---------|--------|---|---|---|---|---|
| COEsteraseB                                  | TR16515 c0_g2_i1 | 0.001   | 3.103  | 0 | 0 | 0 | 1 | N |
| COEsteraseB                                  | TR20006 c0_g1_i1 | 9.379   | 2.884  | 0 | 1 | 1 | 1 | N |
| COEsteraseB                                  | TR20006 c0_g1_i2 | 1.447   | 0.001  | 0 | 1 | 1 | 1 | N |
| COEsteraseB                                  | TR20112 c0_g1_i1 | 856.579 | 5.262  | 1 | 1 | 1 | 1 | Y |
| COEsteraseB                                  | TR21794 c0_g2_i1 | 0.001   | 2.952  | 0 | 1 | 1 | 1 | Y |
| COEsteraseB                                  | TR21794 c0_g2_i2 | 2.941   | 1.375  | 0 | 1 | 1 | 1 | Y |
| COEsteraseB                                  | TR22772 c0_g1_i1 | 28.138  | 10.66  | 0 | 1 | 1 | 1 | Y |
| COEsteraseB                                  | TR23019 c0_g1_i1 | 6.32    | 1.678  | 0 | 1 | 1 | 1 | Y |
| COEsteraseB                                  | TR23019 c0_g1_i2 | 0.296   | 0.001  | 0 | 1 | 1 | 1 | Y |
| COEsteraseB                                  | TR23312 c0_g1_i1 | 12.036  | 3.567  | 0 | 1 | 1 | 1 | Y |
| COEsteraseB                                  | TR24371 c0_g1_i4 | 2.336   | 1.105  | 0 | 0 | 1 | 1 | N |
| COEsteraseB                                  | TR24593 c0_g1_i1 | 10.21   | 13.392 | 0 | 1 | 1 | 1 | Y |
| COEsteraseB                                  | TR33564 c0_g1_i1 | 5.3     | 0.776  | 0 | 0 | 1 | 1 | N |
| COEsteraseB                                  | TR3702 c0_g1_i1  | 0.001   | 0.978  | 0 | 1 | 1 | 1 | N |
| COEsteraseB                                  | TR3702 c0_g2_i1  | 1.459   | 1.847  | 0 | 0 | 1 | 1 | N |
| Colipase                                     | TR21743 c0_g1_i2 | 25.352  | 11.672 | 0 | 0 | 1 | 0 | Y |
| Cystine-knot cytokine domain                 |                  |         |        |   |   |   |   |   |
| TGF-beta-like peptide                        | TR697 c0_g1_i1   | 1270.4  | 2.361  | 1 | 1 | 0 | 0 | Y |
| DUF1397                                      | TR21935 c0_g1_i2 | 8.229   | 2.361  | 0 | 0 | 1 | 0 | N |
| DUF1397                                      | TR22011 c0_g1_i1 | 57.403  | 5.937  | 0 | 0 | 1 | 0 | Y |
| DUF1397                                      | TR22236 c0_g1_i1 | 79.471  | 30.166 | 0 | 0 | 1 | 0 | Y |
| DUF1397                                      | TR23948 c0_g3_i3 | 38.324  | 14.539 | 0 | 0 | 1 | 0 | Y |
| DUF1397                                      | TR23948 c0_g3_i4 | 32.656  | 18.865 | 0 | 0 | 1 | 0 | Y |
| DUF3472                                      | TR23452 c0_g1_i1 | 11.787  | 0.001  | 0 | 1 | 1 | 0 | N |
| DUF3472                                      | TR7722 c0_g1_i1  | 489.926 | 448.45 | 0 | 0 | 0 | 1 | Y |
| Galactose-specific lectin<br>nattectin (CTL) | TR12780 c0_g1_i1 | 17.988  | 17.921 | 0 | 1 | 0 | 1 | Y |
| Galactose-specific lectin<br>nattectin (CTL) | TR16817 c0_g2_i1 | 47.04   | 19.734 | 0 | 0 | 0 | 1 | Y |
| Galactose-specific lectin<br>nattectin (CTL) | TR19878 c0_g1_i1 | 0.001   | 33.303 | 0 | 0 | 0 | 1 | Y |
| GDH                                          | TR14437 c0_g1_i2 | 0.001   | 1.653  | 0 | 0 | 1 | 0 | N |
| GDH                                          | TR18680 c0_g1_i3 | 0.001   | 3.694  | 0 | 1 | 1 | 0 | Y |
| GDH                                          | TR20499 c1_g1_i2 | 0.001   | 0.001  | 0 | 1 | 1 | 0 | N |
| GDH                                          | TR22292 c0_g1_i1 | 2.182   | 0.557  | 0 | 0 | 1 | 0 | Y |
| GDH                                          | TR22292 c0_g1_i3 | 36.878  | 1.366  | 0 | 1 | 1 | 0 | Y |
| GDH                                          | TR22292 c0_g1_i4 | 17.051  | 1.138  | 0 | 1 | 1 | 0 | Y |
| GDH                                          | TR22427 c0_g1_i1 | 2.727   | 5.811  | 0 | 1 | 1 | 0 | Y |
| GDH                                          | TR23793 c0_g1_i1 | 45.214  | 0.379  | 0 | 1 | 1 | 0 | Y |
| GDH                                          | TR24241 c0_g1_i1 | 494.076 | 5.701  | 1 | 1 | 1 | 0 | N |
| GDH                                          | TR24353 c1_g2_i1 | 1.043   | 4.234  | 0 | 1 | 1 | 0 | N |
| GDH                                          | TR24353 c1_g2_i2 | 29.289  | 0.001  | 1 | 1 | 1 | 0 | N |
| GDH                                          | TR24353 c1_g2_i3 | 1.447   | 0.001  | 1 | 1 | 1 | 0 | N |
| GDH                                          | TR24769 c0_g2_i1 | 13.719  | 15.568 | 0 | 1 | 1 | 0 | Y |
| GDH                                          | TR24769 c0_g3_i1 | 10.518  | 3.525  | 0 | 1 | 1 | 0 | N |
| GDH                                          | TR27796 c0_g1_i1 | 0.001   | 10.306 | 0 | 0 | 1 | 0 | N |

|                                                                                                              |                   |         |         |   |   |   |   |   |
|--------------------------------------------------------------------------------------------------------------|-------------------|---------|---------|---|---|---|---|---|
| GDH                                                                                                          | TR40183 c0_g1_i1  | 3.7     | 0.632   | 0 | 0 | 1 | 0 | N |
| GDH                                                                                                          | TR670 c0_g1_i1    | 2.419   | 0.001   | 0 | 0 | 1 | 0 | N |
| GDH                                                                                                          | TR670 c0_g2_i1    | 1.209   | 0.624   | 0 | 0 | 1 | 0 | N |
| GGT                                                                                                          | TR24861 c1_g28_i2 | 1627.83 | 3.205   | 1 | 1 | 1 | 0 | N |
| GGT                                                                                                          | TR24861 c1_g28_i3 | 6303.53 | 6.544   | 1 | 1 | 1 | 0 | N |
| Hyal                                                                                                         | TR15320 c0_g1_i1  | 166.127 | 0.801   | 1 | 1 | 1 | 1 | Y |
| Icarapin-like (Venom<br>carbohydrate-rich protein)                                                           | TR18812 c0_g1_i1  | 532.827 | 52.194  | 1 | 1 | 0 | 1 | Y |
| Insulin-like growth factor-<br>binding protein-related<br>protein 1 (IGFBP-rP1)                              | TR20904 c0_g1_i1  | 85.779  | 104.514 | 0 | 0 | 0 | 1 | Y |
| Insulin-like growth factor-<br>binding protein-related<br>protein 1 (IGFBP-rP1)                              | TR20904 c0_g1_i2  | 120.854 | 82.992  | 0 | 0 | 0 | 1 | Y |
| Kunitz-type serine protease<br>inhibitor 1 (Kunitz protease<br>inhibitor 1) (Kunitz protease<br>inhibitor I) | TR22638 c0_g2_i2  | 45.842  | 28.623  | 0 | 0 | 0 | 1 | Y |
| Kunitz-type serine protease<br>inhibitor conotoxin Cal9.1d<br>(Fragment)                                     | TR17719 c0_g1_i1  | 5.68    | 9.622   | 0 | 0 | 0 | 1 | Y |
| Kunitz-type serine protease<br>inhibitor kunitoxin-Phi1                                                      | TR17719 c0_g1_i2  | 4.174   | 0.001   | 0 | 0 | 0 | 1 | Y |
| LDLA                                                                                                         | TR13632 c0_g1_i1  | 39.723  | 22.77   | 0 | 0 | 0 | 1 | Y |
| LDLA                                                                                                         | TR16285 c0_g1_i1  | 467.041 | 1.923   | 1 | 1 | 1 | 0 | Y |
| LDLA                                                                                                         | TR16784 c0_g1_i1  | 1051.12 | 5.861   | 1 | 1 | 1 | 0 | Y |
| LDLA                                                                                                         | TR18693 c0_g1_i1  | 2124.66 | 3.264   | 1 | 1 | 1 | 0 | Y |
| LDLA                                                                                                         | TR18693 c0_g2_i1  | 0.001   | 0.001   | 0 | 1 | 1 | 0 | N |
| LDLA                                                                                                         | TR18707 c0_g1_i1  | 2740.3  | 3.905   | 1 | 1 | 1 | 0 | Y |
| LDLA                                                                                                         | TR18753 c0_g2_i1  | 747.891 | 1.56    | 1 | 1 | 1 | 0 | Y |
| LDLA                                                                                                         | TR19024 c0_g2_i1  | 328.827 | 0.001   | 1 | 1 | 1 | 0 | Y |
| LDLA                                                                                                         | TR19024 c0_g2_i2  | 335.823 | 1.594   | 1 | 1 | 0 | 0 | Y |
| LDLA                                                                                                         | TR19364 c1_g1_i1  | 416.467 | 2.125   | 1 | 1 | 1 | 0 | Y |
| LDLA                                                                                                         | TR19970 c0_g1_i2  | 2345.46 | 1.518   | 1 | 1 | 1 | 0 | N |
| LDLA                                                                                                         | TR19970 c0_g9_i1  | 1366.57 | 1.518   | 1 | 1 | 0 | 0 | N |
| LDLA                                                                                                         | TR20240 c0_g1_i1  | 608.919 | 3.348   | 1 | 1 | 1 | 0 | Y |
| LDLA                                                                                                         | TR20240 c0_g1_i2  | 199.767 | 0.835   | 1 | 1 | 1 | 0 | Y |
| LDLA                                                                                                         | TR21056 c0_g1_i1  | 37.957  | 21.96   | 0 | 0 | 1 | 0 | Y |
| LDLA                                                                                                         | TR23314 c2_g1_i1  | 1968.33 | 44.595  | 1 | 1 | 1 | 0 | N |
| LDLA                                                                                                         | TR23314 c2_g2_i1  | 65.739  | 0.001   | 1 | 1 | 1 | 0 | N |
| LDLA                                                                                                         | TR23314 c2_g3_i1  | 488.906 | 0.953   | 1 | 1 | 1 | 0 | N |
| LDLA                                                                                                         | TR23314 c2_g4_i1  | 224.182 | 3.036   | 1 | 1 | 1 | 0 | N |
| LDLA                                                                                                         | TR23314 c2_g5_i1  | 369.226 | 0.928   | 1 | 1 | 1 | 0 | N |
| LDLA                                                                                                         | TR23314 c2_g6_i1  | 823.401 | 0.001   | 1 | 1 | 1 | 0 | N |
| LDLA                                                                                                         | TR23314 c2_g7_i1  | 0.001   | 0.001   | 1 | 1 | 1 | 0 | N |
| LDLA                                                                                                         | TR23314 c2_g8_i1  | 143.016 | 0.001   | 1 | 1 | 0 | 0 | N |
| LDLA                                                                                                         | TR23419 c0_g16_i1 | 840.299 | 3.441   | 1 | 1 | 1 | 0 | N |
| LDLA                                                                                                         | TR23419 c0_g16_i2 | 885.121 | 11.537  | 1 | 1 | 1 | 0 | N |
| LDLA                                                                                                         | TR23419 c0_g5_i1  | 306.357 | 14.716  | 1 | 1 | 1 | 0 | N |

|                                                                   |                   |         |        |   |   |   |   |   |
|-------------------------------------------------------------------|-------------------|---------|--------|---|---|---|---|---|
| LDLA                                                              | TR23419 c0_g6_i1  | 526.543 | 7.742  | 1 | 1 | 1 | 0 | Y |
| LDLA                                                              | TR23419 c0_g7_i1  | 85.471  | 3.947  | 1 | 1 | 1 | 0 | N |
| LDLA                                                              | TR23529 c0_g1_i1  | 210.854 | 1.957  | 1 | 1 | 1 | 0 | N |
| LDLA                                                              | TR23529 c0_g14_i1 | 63.249  | 1.459  | 1 | 1 | 1 | 0 | N |
| LDLA                                                              | TR23529 c0_g17_i1 | 7.186   | 0.001  | 1 | 1 | 1 | 0 | N |
| LDLA                                                              | TR23529 c0_g4_i1  | 5055.51 | 6.131  | 0 | 1 | 1 | 0 | N |
| LDLA                                                              | TR24610 c0_g2_i2  | 21.285  | 7.936  | 0 | 0 | 1 | 0 | N |
| LDLA                                                              | TR24746 c0_g1_i1  | 2.763   | 2.193  | 0 | 0 | 0 | 1 | Y |
| LDLA                                                              | TR28335 c0_g1_i1  | 324.036 | 0.001  | 0 | 1 | 1 | 0 | N |
| LysoC                                                             | TR17964 c0_g1_i2  | 7.091   | 10.306 | 0 | 0 | 1 | 0 | Y |
| LysoC                                                             | TR20567 c0_g1_i1  | 26.111  | 7.548  | 0 | 0 | 1 | 0 | Y |
| LysoC                                                             | TR21900 c0_g1_i1  | 15      | 3.854  | 0 | 0 | 1 | 0 | Y |
| M12A                                                              | TR19297 c0_g1_i1  | 23.241  | 6.688  | 0 | 0 | 0 | 1 | Y |
| M12A                                                              | TR19522 c0_g3_i1  | 0.605   | 0.464  | 0 | 0 | 1 | 1 | N |
| M12A                                                              | TR19522 c0_g3_i2  | 0.605   | 0.464  | 0 | 0 | 1 | 1 | N |
| M12A                                                              | TR23788 c2_g2_i2  | 13.885  | 3.736  | 0 | 0 | 1 | 0 | Y |
| Neprilysin-1 (EC 3.4.24.-)                                        | TR18353 c0_g1_i1  | 7.648   | 1.628  | 0 | 0 | 0 | 1 | N |
| Neprilysin-1 (EC 3.4.24.-)                                        | TR23546 c0_g2_i2  | 3.925   | 0.001  | 0 | 0 | 0 | 1 | N |
| Peptidylglycine alpha-hydroxylating monooxygenase                 | TR21936 c0_g1_i1  | 151.317 | 8.754  | 1 | 1 | 0 | 0 | Y |
| Peptidylglycine alpha-hydroxylating monooxygenase                 | TR24300 c0_g1_i1  | 13.731  | 7.742  | 0 | 1 | 0 | 0 | Y |
| Peroxiredoxin-4 (EC 1.11.1.15) (Fragments)                        | TR16950 c0_g1_i1  | 122.36  | 28.538 | 0 | 0 | 0 | 1 | Y |
| Phosphatidylethanolamine-binding protein                          | TR16002 c0_g1_i1  | 35.099  | 0.001  | 1 | 1 | 0 | 0 | Y |
| Phosphatidylethanolamine-binding protein                          | TR16002 c0_g1_i2  | 72.32   | 20.105 | 1 | 1 | 0 | 0 | Y |
| Phospholipase A1 (EC 3.1.1.32) (allergen Pol a 1)                 | TR19711 c0_g1_i2  | 0.937   | 0.001  | 0 | 0 | 0 | 1 | N |
| Phospholipase A1 (EC 3.1.1.32) (allergen Pol a 1)                 | TR19711 c0_g1_i3  | 4.447   | 2.488  | 0 | 0 | 0 | 1 | N |
| Phospholipase A1 2 (EC 3.1.1.32) (allergen Pol d 1.02) (Fragment) | TR19114 c0_g1_i1  | 0.462   | 3.365  | 0 | 0 | 0 | 1 | N |
| Phospholipase B (PLB) (EC 3.1.1.-)                                | TR24850 c1_g8_i1  | 24.154  | 11.385 | 0 | 0 | 0 | 1 | Y |
| PLA2                                                              | TR14704 c0_g1_i1  | 6.652   | 2.159  | 0 | 0 | 0 | 1 | Y |
| PLA2                                                              | TR19781 c0_g3_i1  | 75.937  | 2.285  | 0 | 1 | 1 | 1 | N |
| PLA2                                                              | TR19781 c0_g3_i2  | 13.364  | 2.15   | 0 | 0 | 1 | 1 | N |
| PLA2                                                              | TR19940 c0_g1_i1  | 152.55  | 5.912  | 0 | 1 | 1 | 1 | Y |
| PLA2                                                              | TR20511 c0_g1_i1  | 20.763  | 10.989 | 0 | 1 | 1 | 1 | N |
| PLA2                                                              | TR20889 c1_g1_i1  | 593.859 | 0.001  | 1 | 1 | 1 | 1 | Y |
| PLA2                                                              | TR20889 c1_g1_i2  | 375.155 | 0.001  | 1 | 1 | 1 | 1 | N |
| PLA2                                                              | TR20889 c1_g2_i1  | 945.785 | 2.024  | 1 | 1 | 1 | 1 | Y |
| PLA2                                                              | TR20889 c1_g2_i2  | 337.471 | 0.001  | 1 | 1 | 0 | 0 | Y |
| PLA2                                                              | TR36549 c0_g1_i1  | 5.099   | 0.001  | 0 | 1 | 1 | 1 | N |

|                                                                                                                                                                                         |                  |         |        |   |   |   |   |   |
|-----------------------------------------------------------------------------------------------------------------------------------------------------------------------------------------|------------------|---------|--------|---|---|---|---|---|
| Plancitoxin-1 (EC 3.1.22.1)<br>(Plancitoxin I) (Plan-I)<br>[Cleaved into: Plancitoxin-1<br>subunit alpha; Plancitoxin-1<br>subunit beta]                                                | TR16978 c0_g1_i1 | 7.376   | 2.783  | 0 | 0 | 0 | 1 | Y |
| pM12A                                                                                                                                                                                   | TR15609 c0_g1_i1 | 806.409 | 0.506  | 1 | 1 | 1 | 0 | Y |
| pM12A                                                                                                                                                                                   | TR17723 c0_g1_i1 | 584.836 | 1.425  | 1 | 1 | 1 | 0 | Y |
| pM12A                                                                                                                                                                                   | TR18344 c0_g1_i1 | 2.976   | 10.322 | 0 | 0 | 0 | 1 | Y |
| pM12A                                                                                                                                                                                   | TR19522 c0_g4_i1 | 0.996   | 0.287  | 0 | 1 | 1 | 1 | Y |
| pM12A                                                                                                                                                                                   | TR19522 c0_g4_i2 | 0.498   | 1.999  | 0 | 1 | 1 | 1 | Y |
| pM12A                                                                                                                                                                                   | TR20169 c0_g1_i1 | 564.535 | 9.268  | 1 | 1 | 1 | 0 | Y |
| pM12A                                                                                                                                                                                   | TR21073 c0_g1_i1 | 1.945   | 2.412  | 0 | 0 | 0 | 1 | N |
| pM12A                                                                                                                                                                                   | TR21073 c0_g1_i2 | 0.001   | 4.537  | 0 | 0 | 0 | 1 | N |
| pM12A                                                                                                                                                                                   | TR21550 c0_g2_i1 | 507.44  | 1.847  | 1 | 1 | 1 | 0 | N |
| pM12A                                                                                                                                                                                   | TR22071 c0_g1_i1 | 976.414 | 1.257  | 1 | 1 | 1 | 0 | Y |
| pM12A                                                                                                                                                                                   | TR22258 c0_g1_i1 | 1508.47 | 3.449  | 1 | 1 | 1 | 0 | Y |
| pM12A                                                                                                                                                                                   | TR2263 c0_g1_i1  | 169.317 | 0.001  | 0 | 1 | 1 | 0 | N |
| pM12A                                                                                                                                                                                   | TR22816 c0_g1_i1 | 288.38  | 7.742  | 1 | 1 | 1 | 0 | Y |
| pM12A                                                                                                                                                                                   | TR23204 c0_g1_i1 | 10.435  | 9.631  | 0 | 0 | 1 | 0 | Y |
| pM12A                                                                                                                                                                                   | TR23612 c0_g1_i1 | 270.819 | 2.167  | 1 | 1 | 1 | 0 | Y |
| pM12A                                                                                                                                                                                   | TR23612 c0_g1_i2 | 242.965 | 2.994  | 1 | 1 | 1 | 0 | Y |
| pM12A                                                                                                                                                                                   | TR23756 c1_g1_i1 | 570.772 | 1.206  | 1 | 1 | 1 | 0 | Y |
| pM12A                                                                                                                                                                                   | TR23770 c4_g1_i1 | 6482.85 | 16.167 | 1 | 1 | 1 | 0 | N |
| pM12A                                                                                                                                                                                   | TR24122 c1_g2_i2 | 666.832 | 3.432  | 1 | 1 | 1 | 0 | N |
| pM12A                                                                                                                                                                                   | TR24122 c1_g2_i3 | 131.372 | 3.061  | 1 | 1 | 1 | 0 | Y |
| pM12A                                                                                                                                                                                   | TR24122 c1_g2_i4 | 423.914 | 0.531  | 1 | 1 | 1 | 0 | N |
| pM12A                                                                                                                                                                                   | TR24122 c1_g2_i5 | 50.052  | 1.467  | 1 | 1 | 1 | 0 | N |
| pM12A                                                                                                                                                                                   | TR24398 c1_g1_i1 | 42.474  | 0.001  | 1 | 1 | 1 | 0 | N |
| pM12A                                                                                                                                                                                   | TR24398 c1_g1_i2 | 174.759 | 0.001  | 1 | 1 | 1 | 0 | Y |
| pM12A                                                                                                                                                                                   | TR24398 c1_g1_i3 | 133.471 | 0.001  | 1 | 1 | 1 | 0 | Y |
| pM12A                                                                                                                                                                                   | TR24398 c1_g1_i4 | 220.767 | 0.001  | 1 | 1 | 1 | 0 | Y |
| pM12A                                                                                                                                                                                   | TR24398 c1_g1_i5 | 25.198  | 0.43   | 1 | 1 | 1 | 0 | Y |
| pM12A                                                                                                                                                                                   | TR24398 c1_g1_i6 | 77.016  | 0.228  | 1 | 1 | 1 | 0 | N |
| pM12A                                                                                                                                                                                   | TR24398 c1_g1_i7 | 0.095   | 0.001  | 1 | 1 | 1 | 0 | Y |
| pM12A                                                                                                                                                                                   | TR24398 c1_g1_i8 | 120.249 | 1.847  | 1 | 1 | 1 | 0 | Y |
| pM12A                                                                                                                                                                                   | TR24398 c1_g1_i9 | 107.194 | 0.001  | 1 | 1 | 1 | 0 | Y |
| Prokineticin Bm8-e                                                                                                                                                                      | TR17286 c0_g1_i1 | 47.597  | 22.365 | 0 | 0 | 0 | 1 | Y |
| Putative lysosomal acid<br>lipase/cholesteryl ester<br>hydrolase (Acid cholesteryl<br>ester hydrolase) (LAL) (EC<br>3.1.1.13) (Cholesteryl<br>esterase) (Lipase A) (Sterol<br>esterase) | TR14815 c0_g2_i1 | 0.001   | 2.016  | 0 | 0 | 0 | 1 | N |

|                                                                                                                                                                       |                                  |        |        |   |   |   |   |   |
|-----------------------------------------------------------------------------------------------------------------------------------------------------------------------|----------------------------------|--------|--------|---|---|---|---|---|
| Putative lysosomal acid lipase/cholesteryl ester hydrolase (Acid cholesteryl ester hydrolase) (LAL) (EC 3.1.1.13) (Cholesteryl esterase) (Lipase A) (Sterol esterase) | <a href="#">TR22710 c0_g1_i1</a> | 0.486  | 20.619 | 0 | 0 | 0 | 1 | N |
| Putative lysosomal acid lipase/cholesteryl ester hydrolase (Acid cholesteryl ester hydrolase) (LAL) (EC 3.1.1.13) (Cholesteryl esterase) (Lipase A) (Sterol esterase) | <a href="#">TR22710 c0_g1_i2</a> | 1.802  | 7.404  | 0 | 0 | 0 | 1 | N |
| Putative lysosomal acid lipase/cholesteryl ester hydrolase (Acid cholesteryl ester hydrolase) (LAL) (EC 3.1.1.13) (Cholesteryl esterase) (Lipase A) (Sterol esterase) | <a href="#">TR22710 c0_g1_i3</a> | 0.001  | 4.9    | 0 | 0 | 0 | 1 | N |
| Putative lysosomal acid lipase/cholesteryl ester hydrolase (Acid cholesteryl ester hydrolase) (LAL) (EC 3.1.1.13) (Cholesteryl esterase) (Lipase A) (Sterol esterase) | <a href="#">TR22710 c0_g1_i4</a> | 2.158  | 18.233 | 0 | 0 | 0 | 1 | N |
| Putative lysosomal acid lipase/cholesteryl ester hydrolase (Acid cholesteryl ester hydrolase) (LAL) (EC 3.1.1.13) (Cholesteryl esterase) (Lipase A) (Sterol esterase) | <a href="#">TR23736 c0_g2_i1</a> | 20.111 | 3.373  | 0 | 0 | 0 | 1 | Y |
| Putative lysosomal acid lipase/cholesteryl ester hydrolase (Acid cholesteryl ester hydrolase) (LAL) (EC 3.1.1.13) (Cholesteryl esterase) (Lipase A) (Sterol esterase) | <a href="#">TR6336 c0_g1_i1</a>  | 0.001  | 3.702  | 0 | 0 | 0 | 1 | Y |
| Reticulocalbin-2 (Taipoxin-associated calcium-binding protein 49 homolog)                                                                                             | <a href="#">TR22945 c0_g1_i1</a> | 50.81  | 27.712 | 0 | 0 | 0 | 1 | Y |
| Reticulocalbin-2 (Taipoxin-associated calcium-binding protein 49 homolog)                                                                                             | <a href="#">TR22945 c0_g1_i2</a> | 59.087 | 10.618 | 0 | 0 | 0 | 1 | Y |
| Ryncolin-1                                                                                                                                                            | <a href="#">TR22434 c0_g1_i1</a> | 65.597 | 23.984 | 0 | 0 | 0 | 1 | N |
| Ryncolin-1                                                                                                                                                            | <a href="#">TR22879 c0_g2_i1</a> | 5.443  | 5.009  | 0 | 0 | 0 | 1 | Y |
| Ryncolin-1                                                                                                                                                            | <a href="#">TR22879 c0_g2_i3</a> | 28.186 | 10.246 | 0 | 0 | 0 | 1 | Y |
| Ryncolin-2                                                                                                                                                            | <a href="#">TR19263 c0_g1_i1</a> | 5.775  | 2.969  | 0 | 0 | 0 | 1 | Y |
| Ryncolin-2                                                                                                                                                            | <a href="#">TR22894 c0_g1_i3</a> | 2.099  | 1.476  | 0 | 0 | 0 | 1 | Y |
| Ryncolin-2                                                                                                                                                            | <a href="#">TR22894 c0_g2_i3</a> | 15.225 | 15.669 | 0 | 0 | 0 | 1 | Y |
| Ryncolin-3                                                                                                                                                            | <a href="#">TR21469 c0_g1_i1</a> | 19.387 | 3.475  | 0 | 0 | 0 | 1 | Y |
| Ryncolin-3                                                                                                                                                            | <a href="#">TR22894 c0_g1_i2</a> | 3.664  | 8.914  | 0 | 0 | 0 | 1 | Y |
| Ryncolin-3                                                                                                                                                            | <a href="#">TR22894 c0_g2_i2</a> | 9.617  | 12.017 | 0 | 0 | 0 | 1 | Y |



|            |                  |         |         |   |   |   |   |   |
|------------|------------------|---------|---------|---|---|---|---|---|
| Ryncolin-3 | TR23904 c0_g1_i1 | 11.929  | 6.974   | 0 | 0 | 0 | 1 | N |
| Ryncolin-3 | TR23904 c0_g1_i2 | 18.64   | 5.541   | 0 | 0 | 0 | 1 | N |
| Ryncolin-4 | TR15485 c0_g1_i1 | 13.601  | 0.776   | 0 | 0 | 0 | 1 | N |
| Ryncolin-4 | TR18824 c0_g1_i1 | 11.158  | 5.532   | 0 | 0 | 0 | 1 | Y |
| Ryncolin-4 | TR21327 c0_g1_i2 | 17.206  | 3.078   | 0 | 0 | 0 | 1 | Y |
| Ryncolin-4 | TR22879 c0_g2_i2 | 0.806   | 58.51   | 0 | 0 | 0 | 1 | Y |
| S1         | TR16324 c0_g1_i1 | 4.293   | 2.977   | 0 | 0 | 0 | 1 | Y |
| S1         | TR17834 c0_g1_i1 | 2.893   | 8.163   | 0 | 1 | 1 | 1 | Y |
| S1         | TR18561 c0_g1_i1 | 12.439  | 4.562   | 0 | 1 | 1 | 1 | Y |
| S1         | TR19813 c0_g1_i1 | 41.016  | 0.219   | 0 | 1 | 1 | 1 | Y |
| S1         | TR19863 c0_g1_i1 | 7.174   | 5.22    | 0 | 1 | 1 | 1 | N |
| S1         | TR20081 c0_g1_i2 | 8.443   | 1.779   | 0 | 1 | 1 | 1 | Y |
| S1         | TR20089 c0_g1_i1 | 330.724 | 2.226   | 1 | 1 | 1 | 1 | Y |
| S1         | TR20969 c0_g1_i1 | 487.816 | 2.041   | 1 | 1 | 1 | 1 | Y |
| S1         | TR21969 c0_g1_i1 | 201.914 | 134.798 | 0 | 1 | 1 | 1 | Y |
| S1         | TR23063 c0_g1_i1 | 935.101 | 0.001   | 1 | 1 | 1 | 1 | N |
| S1         | TR23063 c0_g1_i2 | 171.712 | 1.729   | 1 | 1 | 1 | 1 | N |
| S1         | TR23063 c0_g1_i3 | 874.935 | 0.422   | 1 | 1 | 1 | 1 | Y |
| S1         | TR23063 c0_g1_i4 | 232.661 | 0.001   | 1 | 1 | 1 | 1 | Y |
| S1         | TR23063 c0_g1_i5 | 96.344  | 3.39    | 1 | 1 | 1 | 1 | Y |
| S1         | TR23364 c0_g1_i2 | 5.597   | 3.179   | 0 | 1 | 1 | 1 | Y |
| S1         | TR30852 c0_g1_i1 | 114.166 | 0.236   | 1 | 1 | 1 | 1 | N |
| S1         | TR4716 c0_g1_i1  | 2.822   | 1.037   | 0 | 1 | 1 | 1 | Y |
| S1         | TR5471 c0_g1_i1  | 15.368  | 0.001   | 0 | 1 | 1 | 1 | Y |
| S10        | TR21895 c0_g1_i1 | 144.629 | 31.844  | 1 | 1 | 0 | 1 | Y |
| S10        | TR22394 c0_g1_i2 | 26.063  | 7.101   | 0 | 1 | 0 | 1 | Y |
| SCTX01     | TR32344 c0_g1_i1 | 4.364   | 0.001   | 0 | 1 | 1 | 1 | Y |
| SLPTX01    | TR16565 c0_g1_i1 | 144.747 | 84.367  | 0 | 0 | 1 | 0 | Y |
| SLPTX01    | TR17671 c0_g1_i1 | 62.36   | 0       | 1 | 1 | 1 | 0 | Y |
| SLPTX01    | TR20858 c0_g1_i1 | 361.685 | 0       | 1 | 1 | 1 | 0 | Y |
| SLPTX01    | TR20858 c0_g1_i2 | 2494.36 | 5.212   | 1 | 1 | 1 | 0 | Y |
| SLPTX01    | TR21784 c0_g1_i1 | 2.182   | 0.363   | 0 | 1 | 1 | 0 | Y |
| SLPTX01    | TR25567 c0_g1_i1 | 3.51    | 2.707   | 0 | 1 | 1 | 0 | Y |
| SLPTX01    | TR27944 c0_g1_i1 | 6.64    | 9.563   | 0 | 1 | 1 | 0 | Y |
| SLPTX01    | TR28339 c0_g1_i1 | 2.241   | 1.729   | 0 | 1 | 1 | 0 | Y |
| SLPTX01    | TR8371 c0_g1_i1  | 5.502   | 7.421   | 0 | 1 | 1 | 0 | Y |
| SLPTX01    | TR8785 c0_g1_i1  | 0.001   | 3.66    | 0 | 1 | 1 | 0 | N |
| SLPTX01    | TR9209 c0_g1_i1  | 9.51    | 6.123   | 0 | 1 | 1 | 0 | N |
| SLPTX01    | TR9209 c0_g2_i1  | 4.767   | 36.17   | 0 | 1 | 1 | 0 | N |
| SLPTX03    | TR11442 c0_g1_i1 | 617.93  | 4.056   | 1 | 1 | 1 | 1 | Y |
| SLPTX03    | TR15561 c0_g1_i1 | 121.791 | 0.001   | 0 | 1 | 1 | 1 | Y |
| SLPTX03    | TR17861 c0_g1_i1 | 90517.8 | 793.828 | 1 | 1 | 1 | 1 | Y |
| SLPTX03    | TR17861 c0_g1_i2 | 26827.8 | 5.313   | 1 | 1 | 1 | 1 | Y |
| SLPTX03    | TR18290 c0_g1_i1 | 32.538  | 0.001   | 1 | 1 | 1 | 1 | Y |
| SLPTX03    | TR18290 c0_g1_i2 | 11.573  | 0.001   | 1 | 1 | 1 | 1 | Y |

|         |                  |         |         |   |   |   |   |   |
|---------|------------------|---------|---------|---|---|---|---|---|
| SLPTX03 | TR18979 c0_g1_i1 | 15134.3 | 17.575  | 1 | 1 | 1 | 1 | Y |
| SLPTX03 | TR7650 c0_g1_i1  | 751.14  | 6.308   | 1 | 1 | 1 | 0 | Y |
| SLPTX04 | TR12173 c0_g1_i1 | 8.81    | 0.001   | 0 | 0 | 1 | 1 | N |
| SLPTX04 | TR16094 c1_g1_i1 | 7202.88 | 2.825   | 1 | 1 | 1 | 0 | Y |
| SLPTX04 | TR16094 c1_g2_i1 | 1239.92 | 24.651  | 1 | 1 | 1 | 0 | Y |
| SLPTX04 | TR16094 c1_g2_i2 | 30411.8 | 40.758  | 1 | 1 | 1 | 0 | Y |
| SLPTX04 | TR16094 c2_g1_i1 | 4148.02 | 23.015  | 1 | 1 | 1 | 0 | Y |
| SLPTX04 | TR16094 c2_g2_i1 | 17838.5 | 8.762   | 1 | 1 | 0 | 0 | Y |
| SLPTX04 | TR16094 c2_g3_i1 | 150.878 | 3.162   | 1 | 1 | 1 | 0 | Y |
| SLPTX04 | TR16815 c0_g1_i3 | 1.636   | 0.675   | 0 | 0 | 1 | 0 | N |
| SLPTX04 | TR17816 c0_g1_i1 | 3.569   | 0.455   | 0 | 0 | 1 | 0 | Y |
| SLPTX04 | TR19682 c0_g1_i1 | 0.001   | 4.107   | 0 | 1 | 0 | 0 | Y |
| SLPTX04 | TR20546 c0_g1_i2 | 0.001   | 3.997   | 0 | 0 | 0 | 1 | Y |
| SLPTX04 | TR23333 c0_g1_i1 | 30.51   | 6.519   | 0 | 0 | 0 | 1 | Y |
| SLPTX04 | TR30593 c0_g1_i1 | 14.395  | 0.001   | 0 | 1 | 1 | 0 | Y |
| SLPTX04 | TR5896 c0_g1_i1  | 2.099   | 2.167   | 0 | 0 | 0 | 1 | N |
| SLPTX04 | TR7755 c0_g1_i1  | 1175.2  | 2.555   | 1 | 1 | 1 | 0 | Y |
| SLPTX04 | TR9372 c0_g1_i1  | 0.001   | 8.163   | 0 | 0 | 1 | 0 | Y |
| SLPTX05 | TR10171 c0_g1_i1 | 3.711   | 12.372  | 0 | 1 | 1 | 0 | Y |
| SLPTX05 | TR10863 c0_g1_i1 | 1.885   | 5.33    | 0 | 0 | 1 | 1 | Y |
| SLPTX05 | TR12168 c0_g1_i1 | 4.233   | 5.439   | 0 | 0 | 1 | 1 | Y |
| SLPTX05 | TR12173 c0_g2_i1 | 0.001   | 0.001   | 0 | 0 | 1 | 1 | N |
| SLPTX05 | TR14514 c0_g1_i1 | 21      | 16.959  | 0 | 0 | 1 | 1 | Y |
| SLPTX05 | TR15370 c0_g1_i1 | 16.091  | 7.894   | 0 | 1 | 1 | 1 | Y |
| SLPTX05 | TR16174 c0_g1_i1 | 76.613  | 103.376 | 0 | 0 | 1 | 1 | Y |
| SLPTX05 | TR16190 c0_g1_i1 | 1970.34 | 2.091   | 1 | 1 | 1 | 0 | Y |
| SLPTX05 | TR16190 c0_g2_i1 | 362.871 | 4.174   | 1 | 1 | 1 | 1 | Y |
| SLPTX05 | TR16815 c0_g1_i1 | 1.968   | 0.001   | 0 | 1 | 1 | 0 | N |
| SLPTX05 | TR16815 c0_g1_i2 | 23.087  | 1.299   | 0 | 0 | 1 | 0 | N |
| SLPTX05 | TR17410 c0_g1_i1 | 12.202  | 3.424   | 0 | 1 | 1 | 1 | Y |
| SLPTX05 | TR17420 c0_g1_i1 | 34.233  | 183.467 | 0 | 0 | 1 | 0 | Y |
| SLPTX05 | TR18313 c0_g1_i1 | 532.424 | 206.304 | 0 | 1 | 1 | 1 | Y |
| SLPTX05 | TR19433 c0_g1_i1 | 38.395  | 28.521  | 0 | 1 | 1 | 1 | Y |
| SLPTX05 | TR19800 c0_g1_i1 | 2.988   | 9.201   | 0 | 1 | 1 | 1 | Y |
| SLPTX05 | TR19800 c0_g1_i2 | 1.198   | 1.231   | 0 | 0 | 1 | 1 | Y |
| SLPTX05 | TR20505 c0_g1_i1 | 16.198  | 9.361   | 0 | 0 | 1 | 0 | N |
| SLPTX05 | TR20794 c0_g2_i3 | 12.036  | 28.387  | 0 | 0 | 1 | 0 | Y |
| SLPTX05 | TR23449 c0_g1_i1 | 42.012  | 53.012  | 0 | 0 | 1 | 1 | Y |
| SLPTX05 | TR23947 c0_g4_i2 | 35.087  | 21.859  | 0 | 0 | 1 | 1 | N |
| SLPTX05 | TR23947 c0_g4_i3 | 85.814  | 63.84   | 0 | 0 | 1 | 1 | Y |
| SLPTX05 | TR23947 c0_g4_i4 | 47.158  | 38.178  | 0 | 0 | 1 | 0 | Y |
| SLPTX05 | TR23947 c0_g4_i6 | 40.15   | 20.366  | 0 | 0 | 1 | 0 | Y |
| SLPTX05 | TR39901 c0_g1_i1 | 3.984   | 0.683   | 0 | 1 | 1 | 0 | Y |
| SLPTX05 | TR6208 c0_g2_i1  | 1.269   | 3.247   | 0 | 0 | 1 | 0 | Y |
| SLPTX06 | TR14501 c0_g1_i1 | 2619.59 | 2.091   | 0 | 0 | 1 | 0 | Y |

|         |                   |         |         |   |   |   |   |   |
|---------|-------------------|---------|---------|---|---|---|---|---|
| SLPTX07 | TR10974 c0_g1_i1  | 9.996   | 0.001   | 0 | 0 | 0 | 1 | N |
| SLPTX07 | TR12345 c0_g1_i1  | 31.044  | 26.784  | 0 | 0 | 1 | 0 | N |
| SLPTX07 | TR14500 c0_g1_i1  | 37385.9 | 134.469 | 1 | 1 | 1 | 1 | Y |
| SLPTX07 | TR14500 c0_g2_i1  | 14505.8 | 33.506  | 1 | 1 | 1 | 1 | Y |
| SLPTX07 | TR14512 c0_g1_i1  | 10.957  | 3.466   | 0 | 0 | 0 | 1 | Y |
| SLPTX07 | TR15501 c0_g1_i1  | 3508.44 | 9.547   | 1 | 1 | 0 | 0 | Y |
| SLPTX07 | TR15501 c0_g2_i1  | 906.085 | 1.704   | 1 | 1 | 1 | 1 | Y |
| SLPTX07 | TR15501 c0_g3_i1  | 8235.53 | 47.749  | 1 | 1 | 1 | 1 | Y |
| SLPTX07 | TR17289 c1_g1_i1  | 107.597 | 82.031  | 0 | 1 | 1 | 1 | Y |
| SLPTX07 | TR17289 c1_g1_i2  | 204.487 | 222.673 | 0 | 0 | 1 | 0 | Y |
| SLPTX07 | TR18741 c0_g1_i1  | 13.15   | 25.359  | 0 | 0 | 1 | 0 | Y |
| SLPTX07 | TR18741 c0_g1_i2  | 5.692   | 4.394   | 0 | 0 | 1 | 0 | Y |
| SLPTX07 | TR18741 c0_g1_i3  | 2.028   | 2.083   | 0 | 0 | 1 | 0 | Y |
| SLPTX07 | TR18741 c0_g1_i4  | 12.498  | 12.211  | 0 | 0 | 1 | 0 | Y |
| SLPTX07 | TR19685 c0_g1_i1  | 0.001   | 42.976  | 0 | 0 | 1 | 0 | N |
| SLPTX07 | TR19685 c0_g2_i1  | 5.763   | 8.189   | 0 | 0 | 1 | 0 | Y |
| SLPTX07 | TR19685 c0_g2_i2  | 0.001   | 0.001   | 0 | 0 | 1 | 0 | Y |
| SLPTX07 | TR19685 c0_g2_i3  | 4.174   | 27.467  | 0 | 0 | 1 | 0 | Y |
| SLPTX08 | TR10676 c0_g1_i1  | 18.605  | 19.135  | 0 | 0 | 1 | 0 | N |
| SLPTX08 | TR12021 c0_g1_i1  | 5.597   | 3.356   | 0 | 0 | 1 | 1 | Y |
| SLPTX08 | TR12060 c0_g2_i1  | 250.767 | 0.001   | 0 | 0 | 1 | 0 | N |
| SLPTX08 | TR12060 c0_g2_i2  | 19.198  | 0.001   | 0 | 0 | 1 | 0 | N |
| SLPTX08 | TR12747 c0_g2_i1  | 30.012  | 0.001   | 0 | 0 | 1 | 0 | N |
| SLPTX08 | TR12747 c0_g3_i1  | 297.357 | 0.001   | 0 | 0 | 1 | 0 | N |
| SLPTX08 | TR21270 c0_g4_i2  | 1896.93 | 1.653   | 0 | 0 | 1 | 0 | Y |
| SLPTX08 | TR22949 c1_g2_i1  | 56.372  | 0.001   | 0 | 0 | 1 | 0 | N |
| SLPTX08 | TR22965 c1_g1_i1  | 5460.52 | 29.137  | 0 | 0 | 1 | 0 | Y |
| SLPTX08 | TR22965 c2_g1_i1  | 62.312  | 0.978   | 0 | 0 | 1 | 0 | N |
| SLPTX09 | TR16575 c1_g1_i1  | 0.001   | 0.001   | 1 | 1 | 1 | 1 | Y |
| SLPTX09 | TR18971 c0_g15_i1 | 2058.63 | 4.014   | 1 | 1 | 1 | 1 | Y |
| SLPTX10 | TR15721 c0_g1_i1  | 2.348   | 0.902   | 0 | 0 | 0 | 1 | Y |
| SLPTX10 | TR15721 c0_g2_i1  | 11.632  | 7.185   | 0 | 0 | 0 | 1 | Y |
| SLPTX10 | TR18770 c0_g1_i1  | 5204.9  | 28.134  | 1 | 1 | 1 | 0 | Y |
| SLPTX10 | TR18770 c0_g2_i1  | 1631.15 | 0.869   | 1 | 1 | 1 | 0 | Y |
| SLPTX10 | TR18770 c2_g10_i1 | 2857.76 | 58.03   | 1 | 1 | 1 | 0 | N |
| SLPTX10 | TR18770 c2_g11_i1 | 2982.35 | 17.938  | 1 | 1 | 1 | 0 | Y |
| SLPTX10 | TR18770 c2_g4_i1  | 1394.97 | 1.299   | 0 | 0 | 1 | 0 | Y |
| SLPTX10 | TR18770 c2_g7_i1  | 0.001   | 0.001   | 1 | 1 | 1 | 0 | N |
| SLPTX10 | TR21712 c0_g1_i1  | 16.233  | 2.412   | 0 | 0 | 0 | 1 | Y |
| SLPTX10 | TR21712 c0_g1_i2  | 1.802   | 0.001   | 0 | 0 | 0 | 1 | N |
| SLPTX11 | TR1079 c0_g1_i1   | 1152.56 | 20.425  | 0 | 0 | 1 | 0 | N |
| SLPTX11 | TR13891 c0_g1_i1  | 4043.99 | 29.348  | 1 | 1 | 1 | 1 | Y |
| SLPTX11 | TR15540 c0_g1_i1  | 6972.68 | 35.268  | 1 | 1 | 1 | 0 | Y |
| SLPTX11 | TR17307 c0_g1_i1  | 3.664   | 5.65    | 0 | 0 | 1 | 0 | Y |
| SLPTX11 | TR18191 c0_g1_i1  | 65.68   | 1.088   | 0 | 1 | 1 | 0 | Y |

|         |                   |         |         |   |   |   |   |   |
|---------|-------------------|---------|---------|---|---|---|---|---|
| SLPTX11 | TR18613 c0_g1_i1  | 1699.32 | 15.112  | 1 | 1 | 1 | 0 | Y |
| SLPTX11 | TR18660 c1_g1_i1  | 1648.07 | 7.219   | 1 | 1 | 1 | 0 | Y |
| SLPTX11 | TR19632 c0_g1_i1  | 1891.63 | 11.689  | 1 | 1 | 1 | 0 | N |
| SLPTX11 | TR19670 c0_g1_i1  | 10487.5 | 36.036  | 1 | 1 | 1 | 0 | Y |
| SLPTX11 | TR19632 c1_g1_i1  | 4769.53 | 24.642  | 1 | 1 | 1 | 0 | Y |
| SLPTX11 | TR18660 c0_g1_i1  | 1189.5  | 4.436   | 1 | 1 | 1 | 0 | N |
| SLPTX11 | TR24034 c3_g1_i1  | 93.759  | 0.001   | 1 | 1 | 1 | 0 | Y |
| SLPTX11 | TR24034 c3_g1_i2  | 44.644  | 0.001   | 1 | 1 | 1 | 0 | Y |
| SLPTX11 | TR24034 c3_g1_i3  | 53.455  | 0.001   | 1 | 1 | 1 | 0 | Y |
| SLPTX11 | TR19632 c0_g2_i1  | 605.409 | 0.531   | 1 | 1 | 1 | 0 | Y |
| SLPTX11 | TR27662 c0_g1_i1  | 321.689 | 0.261   | 1 | 1 | 1 | 1 | Y |
| SLPTX11 | TR19632 c1_g1_i1  | 4769.53 | 24.642  | 1 | 1 | 1 | 0 | Y |
| SLPTX12 | TR16575 c0_g1_i1  | 7287.62 | 9.757   | 1 | 1 | 1 | 1 | N |
| SLPTX12 | TR16754 c0_g1_i1  | 1088.01 | 0.472   | 1 | 1 | 1 | 0 | Y |
| SLPTX12 | TR18971 c0_g11_i1 | 862.164 | 0.001   | 1 | 1 | 1 | 1 | Y |
| SLPTX12 | TR18971 c0_g13_i1 | 13.079  | 0.001   | 1 | 1 | 1 | 1 | Y |
| SLPTX12 | TR18971 c0_g14_i1 | 5113.98 | 10.795  | 1 | 1 | 1 | 1 | Y |
| SLPTX12 | TR18971 c0_g2_i1  | 208.222 | 6.823   | 1 | 1 | 1 | 1 | Y |
| SLPTX12 | TR18971 c0_g4_i1  | 3971.35 | 22.821  | 1 | 1 | 1 | 1 | Y |
| SLPTX13 | TR17575 c0_g1_i1  | 12168.6 | 27.366  | 1 | 1 | 1 | 1 | Y |
| SLPTX13 | TR17575 c1_g1_i1  | 4653.3  | 46.096  | 1 | 1 | 1 | 1 | Y |
| SLPTX13 | TR17575 c1_g2_i1  | 1424.17 | 1.855   | 1 | 1 | 0 | 0 | Y |
| SLPTX14 | TR11950 c0_g1_i1  | 1.292   | 5.305   | 0 | 1 | 1 | 0 | N |
| SLPTX14 | TR13552 c0_g1_i1  | 11.739  | 67.424  | 0 | 0 | 1 | 0 | Y |
| SLPTX14 | TR14498 c0_g1_i1  | 0.001   | 1.037   | 0 | 1 | 1 | 0 | Y |
| SLPTX14 | TR14498 c0_g2_i1  | 0.001   | 6.418   | 0 | 1 | 1 | 0 | Y |
| SLPTX14 | TR15808 c0_g1_i1  | 4.399   | 22.981  | 0 | 1 | 1 | 0 | Y |
| SLPTX14 | TR16226 c0_g2_i1  | 5.099   | 4.318   | 0 | 0 | 0 | 1 | N |
| SLPTX14 | TR17762 c0_g1_i1  | 201.285 | 323.645 | 0 | 0 | 1 | 0 | Y |
| SLPTX14 | TR18319 c0_g1_i1  | 6.794   | 47.867  | 0 | 0 | 1 | 0 | Y |
| SLPTX14 | TR18955 c0_g2_i1  | 6.794   | 5.423   | 0 | 0 | 1 | 0 | Y |
| SLPTX14 | TR19329 c0_g1_i1  | 11.087  | 10.365  | 0 | 1 | 1 | 0 | Y |
| SLPTX14 | TR20235 c0_g1_i1  | 71.68   | 9.285   | 0 | 0 | 1 | 0 | Y |
| SLPTX14 | TR22155 c0_g3_i1  | 1313.79 | 7.759   | 1 | 1 | 1 | 0 | Y |
| SLPTX14 | TR22155 c0_g5_i1  | 1428.6  | 59.708  | 1 | 1 | 1 | 0 | Y |
| SLPTX14 | TR22155 c0_g6_i1  | 140.87  | 0.001   | 1 | 1 | 1 | 0 | Y |
| SLPTX14 | TR6948 c0_g1_i1   | 0.001   | 24.971  | 0 | 1 | 1 | 0 | N |
| SLPTX15 | TR10447 c0_g1_i1  | 1.767   | 0.001   | 1 | 1 | 1 | 1 | Y |
| SLPTX15 | TR10447 c0_g2_i1  | 8537.8  | 1.931   | 1 | 1 | 0 | 0 | Y |
| SLPTX15 | TR11265 c0_g1_i1  | 5581.26 | 3.424   | 1 | 1 | 1 | 1 | Y |
| SLPTX15 | TR13776 c0_g1_i1  | 19.044  | 2.943   | 0 | 1 | 1 | 0 | Y |
| SLPTX15 | TR14522 c1_g1_i1  | 8748.58 | 0.86    | 1 | 1 | 1 | 0 | Y |
| SLPTX15 | TR16482 c0_g1_i1  | 8228.99 | 106.622 | 1 | 1 | 1 | 1 | Y |
| SLPTX15 | TR17133 c1_g1_i1  | 586.555 | 21.168  | 1 | 1 | 1 | 0 | N |
| SLPTX15 | TR17276 c0_g1_i1  | 1483.29 | 5.541   | 1 | 1 | 1 | 1 | Y |

|         |                  |         |         |   |   |   |   |   |
|---------|------------------|---------|---------|---|---|---|---|---|
| SLPTX15 | TR17276 c0_g2_i1 | 1847.06 | 3.407   | 1 | 1 | 1 | 1 | Y |
| SLPTX15 | TR17276 c0_g3_i1 | 2408.95 | 6.974   | 1 | 1 | 1 | 1 | Y |
| SLPTX15 | TR17462 c0_g1_i1 | 40.648  | 31.355  | 0 | 1 | 1 | 1 | Y |
| SLPTX15 | TR19470 c2_g3_i1 | 7486.56 | 0.001   | 1 | 1 | 1 | 0 | Y |
| SLPTX15 | TR19470 c2_g5_i1 | 3302.08 | 1.4     | 1 | 1 | 1 | 0 | Y |
| SLPTX15 | TR20957 c0_g1_i1 | 61048.5 | 28.58   | 1 | 1 | 0 | 0 | Y |
| SLPTX15 | TR20957 c0_g2_i1 | 44668.1 | 83.675  | 1 | 1 | 1 | 0 | Y |
| SLPTX15 | TR20957 c0_g3_i1 | 48709.4 | 21.497  | 1 | 1 | 1 | 0 | Y |
| SLPTX15 | TR30850 c0_g1_i1 | 1785.89 | 723.224 | 0 | 1 | 1 | 0 | Y |
| SLPTX15 | TR3944 c0_g1_i1  | 7617.32 | 8.509   | 1 | 1 | 1 | 1 | Y |
| SLPTX15 | TR4154 c0_g2_i1  | 1388.6  | 3.196   | 1 | 1 | 1 | 0 | Y |
| SLPTX15 | TR5924 c0_g1_i1  | 6.403   | 0.658   | 0 | 0 | 0 | 1 | N |
| SLPTX15 | TR7644 c0_g1_i1  | 29.692  | 20.341  | 0 | 1 | 1 | 0 | Y |
| SLPTX16 | TR10889 c0_g1_i2 | 6.012   | 10.879  | 0 | 1 | 1 | 1 | Y |
| SLPTX16 | TR11960 c0_g1_i1 | 36.771  | 100.255 | 0 | 1 | 1 | 1 | Y |
| SLPTX16 | TR11969 c0_g1_i1 | 6.735   | 8.804   | 0 | 1 | 1 | 1 | Y |
| SLPTX16 | TR11969 c0_g2_i1 | 0.001   | 6.848   | 0 | 1 | 1 | 1 | Y |
| SLPTX16 | TR11969 c0_g3_i1 | 0.001   | 6.848   | 0 | 1 | 1 | 1 | Y |
| SLPTX16 | TR13490 c0_g1_i2 | 4.02    | 4.065   | 0 | 0 | 0 | 1 | Y |
| SLPTX16 | TR14582 c0_g4_i1 | 2.87    | 0.001   | 0 | 1 | 1 | 1 | Y |
| SLPTX16 | TR15524 c0_g1_i1 | 4.482   | 19.979  | 0 | 0 | 1 | 1 | Y |
| SLPTX16 | TR16248 c0_g1_i1 | 63.534  | 6.249   | 0 | 0 | 0 | 1 | Y |
| SLPTX16 | TR16248 c0_g1_i2 | 25.482  | 0.001   | 0 | 0 | 0 | 1 | Y |
| SLPTX16 | TR16413 c0_g1_i1 | 880.105 | 0.001   | 0 | 1 | 1 | 0 | N |
| SLPTX16 | TR16413 c1_g1_i1 | 1201.14 | 0.001   | 1 | 1 | 1 | 1 | Y |
| SLPTX16 | TR17757 c0_g1_i1 | 728.243 | 347.014 | 0 | 1 | 1 | 0 | Y |
| SLPTX16 | TR18437 c0_g1_i1 | 142.364 | 67.247  | 0 | 0 | 0 | 1 | Y |
| SLPTX16 | TR18472 c0_g1_i1 | 12.949  | 64.928  | 0 | 0 | 1 | 0 | N |
| SLPTX16 | TR18472 c0_g2_i2 | 46.969  | 79.062  | 0 | 1 | 1 | 1 | Y |
| SLPTX16 | TR19255 c0_g3_i1 | 43.779  | 34.442  | 0 | 1 | 1 | 0 | N |
| SLPTX16 | TR19565 c0_g1_i1 | 168.404 | 338.218 | 0 | 1 | 1 | 1 | Y |
| SLPTX16 | TR20122 c0_g1_i1 | 24.463  | 17.01   | 0 | 1 | 1 | 0 | Y |
| SLPTX16 | TR20168 c0_g4_i1 | 69.664  | 111.767 | 0 | 1 | 1 | 1 | Y |
| SLPTX16 | TR20168 c0_g4_i2 | 92.348  | 248.504 | 0 | 1 | 1 | 1 | N |
| SLPTX16 | TR20786 c0_g1_i1 | 4.518   | 15.492  | 0 | 0 | 1 | 1 | Y |
| SLPTX16 | TR20786 c0_g1_i2 | 1.838   | 16.588  | 0 | 1 | 1 | 1 | Y |
| SLPTX16 | TR20786 c0_g1_i3 | 3.664   | 8.206   | 0 | 1 | 1 | 1 | Y |
| SLPTX16 | TR20786 c0_g2_i1 | 3.13    | 39.451  | 0 | 0 | 1 | 1 | Y |
| SLPTX16 | TR20786 c0_g3_i1 | 1.636   | 5.895   | 0 | 0 | 1 | 1 | Y |
| SLPTX16 | TR20786 c0_g4_i1 | 19.459  | 71.902  | 0 | 1 | 1 | 1 | Y |
| SLPTX16 | TR23350 c0_g1_i1 | 20.383  | 25.022  | 0 | 0 | 0 | 1 | Y |
| SLPTX16 | TR24750 c0_g1_i2 | 1.968   | 5.448   | 0 | 0 | 0 | 1 | N |
| SLPTX16 | TR33227 c0_g1_i1 | 5.253   | 0.388   | 0 | 0 | 1 | 0 | N |
| SLPTX16 | TR5548 c0_g1_i1  | 1.767   | 1.265   | 0 | 0 | 1 | 1 | Y |
| SLPTX16 | TR6911 c0_g1_i1  | 4.447   | 12.954  | 0 | 0 | 1 | 1 | Y |

|         |                  |         |          |   |   |   |   |   |
|---------|------------------|---------|----------|---|---|---|---|---|
| SLPTX16 | TR8305 c0_g1_i1  | 64.245  | 193.772  | 0 | 0 | 1 | 0 | N |
| SLPTX16 | TR8556 c0_g2_i1  | 5.395   | 1.417    | 0 | 1 | 1 | 1 | Y |
| SLPTX16 | TR8556 c0_g3_i1  | 13.482  | 43.558   | 0 | 1 | 1 | 1 | Y |
| SLPTX17 | TR11220 c0_g1_i1 | 7.032   | 2.066    | 0 | 0 | 1 | 0 | Y |
| SLPTX17 | TR11773 c0_g1_i1 | 420.464 | 12.279   | 1 | 1 | 1 | 0 | Y |
| SLPTX17 | TR16146 c0_g3_i1 | 69.534  | 11.604   | 0 | 0 | 1 | 0 | N |
| SLPTX17 | TR16752 c0_g1_i1 | 59.419  | 109.996  | 0 | 0 | 1 | 0 | Y |
| SLPTX17 | TR17036 c0_g1_i2 | 0.984   | 2.53     | 0 | 0 | 1 | 0 | Y |
| SLPTX17 | TR18448 c0_g1_i1 | 17.419  | 11.284   | 0 | 0 | 1 | 0 | Y |
| SLPTX17 | TR18448 c0_g3_i1 | 11.431  | 12.726   | 0 | 0 | 1 | 0 | Y |
| SLPTX17 | TR18755 c0_g1_i1 | 152.633 | 95.608   | 0 | 0 | 1 | 0 | Y |
| SLPTX17 | TR18755 c0_g1_i2 | 121.838 | 115.047  | 0 | 0 | 1 | 0 | Y |
| SLPTX17 | TR18837 c0_g3_i1 | 116.016 | 0.001    | 1 | 1 | 1 | 0 | N |
| SLPTX17 | TR18894 c0_g1_i1 | 3845.67 | 1802.106 | 0 | 0 | 1 | 0 | Y |
| SLPTX17 | TR22204 c0_g5_i1 | 29.846  | 51.418   | 0 | 0 | 1 | 0 | Y |
| SLPTX17 | TR22204 c0_g6_i1 | 62.858  | 64.616   | 0 | 0 | 1 | 0 | Y |
| SLPTX17 | TR22204 c0_g6_i2 | 28.565  | 2.353    | 0 | 0 | 1 | 0 | Y |
| SLPTX17 | TR5383 c0_g1_i1  | 1.423   | 2.699    | 0 | 1 | 1 | 0 | Y |
| SLPTX17 | TR608 c0_g1_i1   | 0.001   | 1.982    | 0 | 0 | 1 | 0 | N |
| SLPTX18 | TR17281 c0_g1_i1 | 9.617   | 4.394    | 0 | 0 | 1 | 0 | Y |
| SLPTX18 | TR17281 c0_g1_i2 | 5.336   | 5.49     | 0 | 0 | 1 | 0 | Y |
| SLPTX18 | TR21743 c0_g1_i1 | 53.348  | 24.305   | 0 | 0 | 1 | 0 | Y |
| SLPTX19 | TR21403 c0_g1_i1 | 19.802  | 10.483   | 0 | 0 | 1 | 0 | Y |
| SLPTX27 | TR13532 c0_g1_i1 | 23.348  | 159.187  | 0 | 0 | 1 | 0 | N |
| SLPTX27 | TR14827 c0_g1_i1 | 335.562 | 209.593  | 0 | 0 | 1 | 0 | Y |
| SLPTX27 | TR18510 c0_g1_i1 | 10.21   | 15.096   | 0 | 0 | 1 | 0 | Y |
| SLPTX27 | TR18713 c0_g1_i1 | 0.001   | 11.478   | 0 | 0 | 1 | 0 | Y |
| SLPTX27 | TR18716 c0_g1_i1 | 5113.06 | 12.296   | 0 | 0 | 1 | 0 | Y |
| SLPTX27 | TR21542 c0_g5_i1 | 41.965  | 230.153  | 0 | 0 | 1 | 0 | Y |
| SLPTX27 | TR21542 c0_g5_i2 | 26.763  | 215.21   | 0 | 0 | 1 | 0 | Y |
| SLPTX27 | TR21542 c0_g5_i3 | 7.257   | 12.009   | 0 | 0 | 1 | 0 | Y |
| SLPTX27 | TR2770 c0_g1_i1  | 0.001   | 12.802   | 0 | 0 | 1 | 0 | Y |
| SLPTX27 | TR2770 c0_g2_i1  | 2.253   | 0.001    | 0 | 0 | 1 | 0 | N |
| SLPTX27 | TR5036 c0_g1_i1  | 0.001   | 0.001    | 0 | 0 | 1 | 0 | N |
| SLPTX28 | TR15500 c0_g1_i2 | 5610.49 | 2.893    | 0 | 0 | 1 | 0 | Y |
| SLPTX29 | TR13658 c0_g1_i1 | 15.806  | 3.129    | 0 | 1 | 0 | 0 | Y |
| SLPTX29 | TR16516 c0_g1_i1 | 9.937   | 12.127   | 0 | 1 | 0 | 0 | Y |
| SLPTX29 | TR16849 c0_g1_i1 | 0.001   | 5.094    | 0 | 1 | 0 | 0 | Y |
| SLPTX29 | TR16849 c0_g2_i1 | 0.001   | 0.001    | 0 | 1 | 0 | 0 | Y |
| SLPTX29 | TR16849 c0_g3_i1 | 0.001   | 2.547    | 0 | 1 | 0 | 0 | Y |
| SLPTX29 | TR16849 c0_g4_i1 | 12.391  | 0.001    | 0 | 1 | 0 | 0 | Y |
| SLPTX29 | TR17378 c0_g1_i1 | 8.3     | 0.658    | 0 | 1 | 0 | 0 | Y |
| SLPTX29 | TR17378 c0_g1_i2 | 20.466  | 4.487    | 0 | 1 | 0 | 0 | Y |
| SLPTX29 | TR18566 c0_g1_i1 | 9.202   | 62.668   | 0 | 1 | 0 | 0 | Y |
| SLPTX29 | TR20398 c0_g1_i1 | 178.02  | 60.661   | 1 | 1 | 0 | 0 | Y |

|                                                                                      |                  |         |         |   |   |   |   |   |
|--------------------------------------------------------------------------------------|------------------|---------|---------|---|---|---|---|---|
| SLPTX29                                                                              | TR9140 c0_g1_i1  | 1.802   | 8.332   | 0 | 1 | 0 | 0 | Y |
| SLPTX30                                                                              | TR11088 c0_g1_i1 | 1.233   | 6.317   | 0 | 1 | 0 | 0 | Y |
| SLPTX30                                                                              | TR14992 c0_g1_i1 | 4.174   | 13.156  | 0 | 1 | 0 | 0 | Y |
| SLPTX30                                                                              | TR16900 c0_g2_i2 | 12.451  | 5.735   | 0 | 1 | 0 | 0 | Y |
| SLPTX30                                                                              | TR17377 c0_g1_i1 | 968.505 | 1.198   | 1 | 1 | 0 | 0 | N |
| SLPTX30                                                                              | TR17377 c0_g4_i1 | 5685.34 | 39.89   | 1 | 1 | 0 | 0 | N |
| SLPTX30                                                                              | TR17377 c0_g6_i1 | 0.001   | 0.001   | 0 | 1 | 0 | 0 | N |
| SLPTX30                                                                              | TR17377 c0_g9_i1 | 1837.71 | 20.628  | 0 | 1 | 0 | 0 | N |
| SLPTX30                                                                              | TR17649 c0_g1_i1 | 15.296  | 0.523   | 0 | 1 | 0 | 0 | N |
| SLPTX30                                                                              | TR17937 c0_g1_i1 | 2.36    | 10.314  | 0 | 1 | 0 | 0 | Y |
| SLPTX30                                                                              | TR19075 c0_g1_i2 | 35760.7 | 31.296  | 1 | 1 | 0 | 0 | Y |
| SLPTX30                                                                              | TR20371 c0_g4_i2 | 50.739  | 19.995  | 0 | 1 | 0 | 0 | Y |
| SLPTX30                                                                              | TR23271 c1_g4_i3 | 40.802  | 49.394  | 0 | 1 | 0 | 0 | Y |
| SLPTX30                                                                              | TR23271 c1_g5_i1 | 170.692 | 65.232  | 0 | 1 | 0 | 0 | Y |
| SLPTX30                                                                              | TR23271 c1_g5_i2 | 56.206  | 27.358  | 0 | 1 | 0 | 0 | Y |
| SLPTX30                                                                              | TR8258 c0_g1_i1  | 2182.81 | 0.001   | 1 | 1 | 0 | 0 | Y |
| SLPTX31                                                                              | TR20670 c0_g1_i1 | 6757.79 | 2.142   | 1 | 1 | 0 | 0 | Y |
| SLPTX31                                                                              | TR20670 c1_g3_i1 | 1245.56 | 1.063   | 1 | 1 | 0 | 0 | N |
| SLPTX31                                                                              | TR20670 c1_g4_i2 | 45      | 0.001   | 0 | 1 | 0 | 0 | Y |
| SLPTX31                                                                              | TR20670 c1_g6_i1 | 6246.22 | 0.877   | 1 | 1 | 0 | 0 | Y |
| SLPTX31                                                                              | TR20670 c1_g6_i2 | 3382.91 | 2.716   | 1 | 1 | 0 | 0 | Y |
| SLPTX31                                                                              | TR20670 c1_g7_i1 | 75.486  | 0.001   | 0 | 1 | 0 | 0 | N |
| Snaclec A10 (C-type lectin A10)                                                      | TR11739 c0_g1_i1 | 2.028   | 25.106  | 0 | 0 | 0 | 1 | N |
| Snaclec A14 (C-type lectin A14)                                                      | TR28449 c0_g1_i1 | 3.617   | 0.001   | 0 | 0 | 0 | 1 | N |
| Snaclec agkicetin-C subunit beta (Antithrombin A subunit B)                          | TR10075 c0_g1_i1 | 4.221   | 10.82   | 0 | 0 | 0 | 1 | N |
| Snaclec B9 (C-type lectin B9)                                                        | TR24705 c0_g1_i1 | 16.044  | 5.735   | 0 | 0 | 0 | 1 | Y |
| Snaclec B9 (C-type lectin B9)                                                        | TR24705 c0_g1_i2 | 0.001   | 0.001   | 0 | 0 | 0 | 1 | Y |
| Snaclec coagulation factor IX/factor X-binding protein subunit B (IX/X-bp subunit B) | TR24705 c0_g1_i3 | 1.731   | 0.7     | 0 | 0 | 0 | 1 | N |
| Transferrin                                                                          | TR23345 c0_g1_i2 | 24.036  | 0.001   | 0 | 1 | 1 | 0 | Y |
| Transferrin                                                                          | TR23345 c0_g1_i3 | 24.972  | 0.001   | 0 | 1 | 1 | 0 | Y |
| Transferrin                                                                          | TR23627 c0_g2_i1 | 9.664   | 2.656   | 0 | 1 | 1 | 0 | Y |
| Transferrin                                                                          | TR24679 c0_g6_i1 | 255.807 | 10.483  | 1 | 1 | 1 | 0 | N |
| Turriptide Gsg9.2                                                                    | TR19477 c0_g1_i1 | 2.609   | 0.001   | 0 | 0 | 0 | 1 | Y |
| Turriptide Gsg9.2                                                                    | TR19477 c0_g1_i3 | 224.787 | 466.16  | 0 | 0 | 0 | 1 | Y |
| Turriptide Gsp9.3                                                                    | TR10015 c0_g1_i1 | 217.151 | 20.813  | 0 | 0 | 0 | 1 | Y |
| Turriptide Gsp9.3                                                                    | TR22969 c0_g1_i8 | 11.478  | 0.001   | 0 | 0 | 0 | 1 | Y |
| Turriptide Ici9.2                                                                    | TR10015 c0_g2_i1 | 666.369 | 581.561 | 0 | 0 | 0 | 1 | Y |
| Turriptide Lol9.1 (Turriptide OL11)                                                  | TR17065 c0_g1_i1 | 240.036 | 221.602 | 0 | 0 | 0 | 1 | Y |
| Turriptide OL11-like (Fragment)                                                      | TR19477 c0_g1_i2 | 68.858  | 265.481 | 0 | 0 | 0 | 1 | Y |
| Turriptide Pal9.2                                                                    | TR22969 c0_g1_i3 | 0.001   | 4.368   | 0 | 0 | 0 | 1 | Y |

|                                                                           |                   |         |         |   |   |   |   |   |
|---------------------------------------------------------------------------|-------------------|---------|---------|---|---|---|---|---|
| U-actitoxin-Avd3j (U-AITX-Avd3j) (AsKC7)                                  | TR22638 c0_g2_i1  | 54.036  | 45.903  | 0 | 0 | 0 | 1 | Y |
| U1-hexatoxin-lw1a (U1-HXTX-lw1a) (Atracotoxin-Hs20f7358) (AcTx-Hs20f7358) | TR36276 c0_g1_i1  | 0.001   | 6.704   | 0 | 0 | 0 | 1 | N |
| U24-ctenitoxin-Pn1a (U24-CNTX-Pn1a) (Venom protein PN16C3)                | TR19696 c0_g2_i1  | 18.605  | 2.909   | 0 | 0 | 0 | 1 | Y |
| Unchar                                                                    | TR21205 c0_g2_i1  | 1139.93 | 3.348   | 1 | 1 | 1 | 0 | Y |
| Unchar                                                                    | TR23452 c0_g1_i3  | 7.127   | 0.001   | 0 | 0 | 1 | 0 | N |
| Unchar02                                                                  | TR15561 c0_g1_i7  | 271.542 | 0.001   | 1 | 1 | 0 | 0 | Y |
| Unchar02                                                                  | TR24670 c2_g15_i1 | 12.652  | 0.001   | 1 | 1 | 1 | 1 | N |
| Unchar05                                                                  | TR20861 c0_g1_i1  | 115.874 | 0.001   | 0 | 0 | 1 | 0 | N |
| Unchar05                                                                  | TR20861 c1_g1_i1  | 433.436 | 1.096   | 1 | 1 | 1 | 0 | Y |
| Unchar06                                                                  | TR16224 c0_g1_i1  | 3249.04 | 198.453 | 1 | 1 | 1 | 0 | Y |
| Unchar08                                                                  | TR2247 c0_g1_i1   | 5.134   | 1.316   | 0 | 0 | 1 | 0 | N |
| Unchar10                                                                  | TR15456 c0_g1_i1  | 6.166   | 0.001   | 0 | 0 | 1 | 0 | N |
| Unchar10                                                                  | TR24015 c0_g1_i10 | 292.21  | 1.088   | 1 | 1 | 1 | 0 | N |
| Unchar10                                                                  | TR24569 c0_g1_i1  | 15.273  | 3.879   | 1 | 1 | 1 | 0 | N |
| Unchar10                                                                  | TR24569 c0_g16_i1 | 136.21  | 17.263  | 1 | 1 | 1 | 0 | N |
| Unchar10                                                                  | TR24569 c0_g17_i1 | 60.961  | 7.759   | 1 | 1 | 1 | 0 | N |
| Unchar10                                                                  | TR24569 c0_g27_i1 | 138.759 | 6.654   | 1 | 1 | 1 | 0 | N |
| Unchar10                                                                  | TR24569 c0_g27_i2 | 101.099 | 2.682   | 1 | 1 | 1 | 0 | N |
| Unchar10                                                                  | TR24569 c0_g8_i1  | 0.001   | 2.876   | 1 | 1 | 1 | 0 | N |
| Unchar10                                                                  | TR24569 c0_g8_i2  | 44.822  | 0.001   | 1 | 1 | 1 | 0 | N |
| Unchar10                                                                  | TR24569 c0_g8_i3  | 0.001   | 0.001   | 1 | 1 | 1 | 0 | N |
| Unchar10                                                                  | TR25114 c0_g1_i1  | 0.001   | 0.902   | 0 | 1 | 1 | 1 | N |
| Unchar11                                                                  | TR12347 c0_g1_i1  | 89.526  | 496.385 | 0 | 1 | 1 | 0 | Y |
| Unchar11                                                                  | TR14080 c0_g1_i1  | 54.498  | 27.636  | 0 | 1 | 1 | 0 | Y |
| Unchar11                                                                  | TR19607 c0_g1_i1  | 54.546  | 325.973 | 0 | 1 | 1 | 0 | Y |
| Unchar11                                                                  | TR20772 c0_g2_i1  | 16357.5 | 197.938 | 1 | 1 | 1 | 0 | Y |
| Unchar11                                                                  | TR20772 c0_g2_i2  | 156.273 | 12.591  | 1 | 1 | 1 | 0 | Y |
| Unchar11                                                                  | TR20772 c0_g3_i1  | 5652.98 | 559.263 | 1 | 1 | 1 | 0 | Y |
| Unchar11                                                                  | TR21070 c0_g4_i1  | 13894.6 | 196.952 | 1 | 1 | 1 | 0 | Y |
| Unchar11                                                                  | TR21070 c0_g4_i3  | 6257.32 | 613.085 | 0 | 0 | 1 | 0 | N |
| Unchar11                                                                  | TR35624 c0_g1_i1  | 2.787   | 1.189   | 0 | 0 | 0 | 1 | N |
| Uncharacterized12                                                         | TR14806 c0_g1_i1  | 1.684   | 4.318   | 0 | 1 | 0 | 0 | N |
| Uncharacterized12                                                         | TR23551 c0_g1_i2  | 21.676  | 5.701   | 1 | 1 | 0 | 0 | N |
| Uncharacterized13                                                         | TR20632 c0_g1_i1  | 79.862  | 0.32    | 1 | 1 | 0 | 0 | Y |
| Uncharacterized13                                                         | TR9580 c0_g1_i1   | 80.633  | 27.931  | 0 | 1 | 0 | 0 | Y |
| Uncharacterized14                                                         | TR21637 c0_g3_i1  | 9.332   | 1.906   | 1 | 1 | 0 | 0 | Y |
| Uncharacterized15                                                         | TR17179 c0_g1_i1  | 3917.54 | 28.547  | 1 | 1 | 0 | 0 | Y |
| Veficolin-1 (Fragment)                                                    | TR22894 c0_g2_i1  | 13.518  | 21.699  | 0 | 0 | 0 | 1 | Y |
| Venom acid phosphatase Acph-1 (EC 3.1.3.2) (allergen Api m 3)             | TR22183 c0_g1_i1  | 3.783   | 1.611   | 0 | 0 | 0 | 1 | Y |



|                                                                                                                                                                                                                                                                           |                                  |       |       |   |   |   |   |   |
|---------------------------------------------------------------------------------------------------------------------------------------------------------------------------------------------------------------------------------------------------------------------------|----------------------------------|-------|-------|---|---|---|---|---|
| Venom acid phosphatase<br>Acph-1 (EC 3.1.3.2) (allergen<br>Api m 3)                                                                                                                                                                                                       | <a href="#">TR22183 c0_g1_i2</a> | 3.036 | 0.548 | 0 | 0 | 0 | 1 | Y |
| Venom acid phosphatase<br>Acph-1 (EC 3.1.3.2) (allergen<br>Api m 3)                                                                                                                                                                                                       | <a href="#">TR22183 c0_g1_i3</a> | 0.001 | 0.001 | 0 | 0 | 0 | 1 | Y |
| Venom acid phosphatase<br>Acph-1 (EC 3.1.3.2) (allergen<br>Api m 3)                                                                                                                                                                                                       | <a href="#">TR22183 c0_g1_i4</a> | 2.075 | 1.746 | 0 | 0 | 0 | 1 | Y |
| Venom dipeptidyl peptidase<br>4 (Allergen C) (Venom<br>dipeptidyl peptidase IV) (EC<br>3.4.14.5) (allergen Api m 5)                                                                                                                                                       | <a href="#">TR22897 c0_g1_i1</a> | 0.723 | 2.808 | 0 | 0 | 0 | 1 | Y |
| Venom dipeptidyl peptidase<br>4 (Allergen C) (Venom<br>dipeptidyl peptidase IV) (EC<br>3.4.14.5) (allergen Api m 5)                                                                                                                                                       | <a href="#">TR22897 c0_g1_i2</a> | 5.111 | 2.597 | 0 | 0 | 0 | 1 | Y |
| Venom dipeptidyl peptidase<br>4 (EC 3.4.14.5) (Venom<br>dipeptidyl peptidase IV)<br>(allergen Ves v 3)                                                                                                                                                                    | <a href="#">TR22897 c0_g1_i4</a> | 0.001 | 1.923 | 0 | 0 | 0 | 1 | Y |
| Venom peptide SjAPI-2<br>(Ascaris-type protease<br>inhibitor-2)                                                                                                                                                                                                           | <a href="#">TR20998 c0_g2_i1</a> | 9.024 | 5.701 | 0 | 0 | 0 | 1 | Y |
| Venom phosphodiesterase 1<br>(Ectonucleotide<br>pyrophosphatase/phosphodi<br>esterase family member 3)<br>(PDE-3) [Includes: Alkaline<br>phosphodiesterase I (PDE)<br>(EC 3.1.4.1); Nucleotide<br>pyrophosphatase (NPPase)<br>(EC 3.6.1.9) (Nucleotide<br>diphosphatase)] | <a href="#">TR20520 c0_g1_i2</a> | 6.225 | 0.001 | 0 | 0 | 0 | 1 | N |
| Venom phosphodiesterase 1<br>(Ectonucleotide<br>pyrophosphatase/phosphodi<br>esterase family member 3)<br>(PDE-3) [Includes: Alkaline<br>phosphodiesterase I (PDE)<br>(EC 3.1.4.1); Nucleotide<br>pyrophosphatase (NPPase)<br>(EC 3.6.1.9) (Nucleotide<br>diphosphatase)] | <a href="#">TR21503 c0_g1_i3</a> | 0.001 | 0.001 | 0 | 0 | 0 | 1 | Y |
| Venom phosphodiesterase 2<br>(Ectonucleotide<br>pyrophosphatase/phosphodi<br>esterase family member 3)<br>(PDE-3) [Includes: Alkaline<br>phosphodiesterase I (PDE)<br>(EC 3.1.4.1); Nucleotide<br>pyrophosphatase (NPPase)<br>(EC 3.6.1.9) (Nucleotide<br>diphosphatase)] | <a href="#">TR20030 c0_g1_i1</a> | 2.478 | 2.547 | 0 | 0 | 0 | 1 | Y |

|                                                                                                                                                                                                                                                                           |                  |        |        |   |   |   |   |   |
|---------------------------------------------------------------------------------------------------------------------------------------------------------------------------------------------------------------------------------------------------------------------------|------------------|--------|--------|---|---|---|---|---|
| Venom phosphodiesterase 2<br>(Ectonucleotide<br>pyrophosphatase/phosphodi<br>esterase family member 3)<br>(PDE-3) [Includes: Alkaline<br>phosphodiesterase I (PDE)<br>(EC 3.1.4.1); Nucleotide<br>pyrophosphatase (NPPase)<br>(EC 3.6.1.9) (Nucleotide<br>diphosphatase)] | TR20520 c0_g1_i1 | 11.312 | 1.046  | 0 | 0 | 0 | 1 | N |
| Venom phosphodiesterase 2<br>(Ectonucleotide<br>pyrophosphatase/phosphodi<br>esterase family member 3)<br>(PDE-3) [Includes: Alkaline<br>phosphodiesterase I (PDE)<br>(EC 3.1.4.1); Nucleotide<br>pyrophosphatase (NPPase)<br>(EC 3.6.1.9) (Nucleotide<br>diphosphatase)] | TR20843 c0_g1_i1 | 11.217 | 6.915  | 0 | 0 | 0 | 1 | N |
| Venom prothrombin<br>activator notecarin-D1 (vPA)<br>(EC 3.4.21.6) (Venom<br>coagulation factor Xa-like<br>protease) [Cleaved into:<br>Notecarin-D1 light chain;<br>Notecarin-D1 heavy chain]                                                                             | TR24746 c0_g1_i2 | 4.779  | 1.999  | 0 | 0 | 0 | 1 | N |
| Venom prothrombin<br>activator oscutarin-C non-<br>catalytic subunit (vPA)<br>(Venom coagulation factor<br>Va-like protein) [Cleaved<br>into: Oscutarin-C non-<br>catalytic subunit heavy chain;<br>Oscutarin-C non-catalytic<br>subunit light chain]                     | TR22552 c0_g1_i1 | 6.7    | 53.847 | 0 | 0 | 0 | 1 | N |
| Zinc metalloproteinase-<br>disintegrin-like EoVMP2 (EC<br>3.4.24.-) (Haemorrhagic 56<br>kDa metalloproteinase)<br>(Snake venom<br>metalloproteinase) (SVMP)<br>(Zinc metalloproteinase-<br>disintegrin-like Eoc22)                                                        | TR13064 c0_g1_i1 | 2.419  | 1.451  | 0 | 0 | 0 | 1 | N |

TABLE S2

Protein summary from Protein Pilot search of combined crude venom and all rpHPLC fraction datasets as well as additional contigs identified by concatenated individual Protein Pilot data searches (last 66 rows)

| N  | Unused | Total | %Cov        | %Cov(50)  | %Cov(95)    | Accession             | Peptides(95%) |
|----|--------|-------|-------------|-----------|-------------|-----------------------|---------------|
| 1  | 99.32  | 99.32 | 85.71000099 | 83.19     | 83.19000006 | TR15540 c0_g1_i1 CDS3 | 173           |
| 2  | 98.02  | 98.02 | 92.46000051 | 85.509998 | 85.50999761 | TR23240 c0_g1_i4 CDS2 | 158           |
| 3  | 91.94  | 91.94 | 85.07000208 | 83.770001 | 80.4099977  | TR24241 c0_g1_i1 CDS3 | 83            |
| 4  | 91.72  | 91.72 | 72.75000215 | 64.899999 | 61.6599977  | TR21205 c0_g2_i1 CDS2 | 90            |
| 5  | 88.71  | 88.71 | 87.66999841 | 85.390002 | 85.39000154 | TR19670 c0_g1_i1 CDS1 | 171           |
| 6  | 80.57  | 80.57 | 85.53000093 | 78.750002 | 76.74000263 | TR20112 c0_g1_i1 CDS1 | 84            |
| 7  | 79.81  | 79.81 | 82.31999874 | 76.76     | 70.70000172 | TR22258 c0_g1_i1 CDS1 | 79            |
| 8  | 72.59  | 72.59 | 78.40999961 | 75.43     | 75.42999983 | TR23756 c1_g1_i1 CDS2 | 70            |
| 9  | 66.84  | 66.84 | 72.81000018 | 71.929997 | 71.92999721 | TR14746 c0_g1_i1 CDS1 | 85            |
| 10 | 66.64  | 66.64 | 74.44999814 | 71.05     | 71.05000019 | TR23970 c2_g1_i1 CDS1 | 84            |
| 11 | 61.45  | 61.45 | 83.91000032 | 74.779999 | 74.77999926 | TR18660 c1_g1_i1 CDS1 | 93            |
| 12 | 56.6   | 56.6  | 76.3899982  | 65.280002 | 60.8799994  | TR15609 c0_g1_i1 CDS1 | 46            |
| 13 | 53.84  | 59.08 | 83.32999945 | 75.739998 | 71.81000113 | TR22071 c0_g1_i1 CDS2 | 40            |
| 14 | 52.15  | 52.15 | 87.1900022  | 80.070001 | 76.87000036 | TR23770 c4_g2_i1 CDS2 | 47            |
| 15 | 50.56  | 50.56 | 75.18000007 | 59.850001 | 59.85000134 | TR22931 c0_g3_i1 CDS1 | 92            |
| 16 | 50.46  | 52.62 | 87.1999979  | 70.770001 | 63.28999996 | TR24398 c1_g1_i8 CDS2 | 49            |
| 17 | 47.89  | 47.89 | 99.32000041 | 91.890001 | 90.53999782 | TR23597 c1_g3_i3 CDS3 | 103           |
| 18 | 47.61  | 50.29 | 81.08000159 | 71.429998 | 71.42999768 | TR23770 c4_g1_i1 CDS2 | 65            |
| 18 | 0      | 50.29 | 81.70999885 | 75.199997 | 75.19999743 | TR23770 c3_g1_i1 CDS1 | 65            |
| 19 | 43.42  | 45.52 | 69.599998   | 63.18     | 57.23999739 | TR24122 c1_g2_i3 CDS2 | 48            |
| 20 | 43.13  | 51.17 | 68.45999956 | 61.680001 | 58.88000131 | TR20169 c0_g1_i1 CDS1 | 64            |
| 21 | 41.2   | 41.2  | 70.70000172 | 56.900001 | 51.81999803 | TR23612 c0_g1_i2 CDS1 | 32            |
| 22 | 40.73  | 40.73 | 65.21999836 | 59.780002 | 59.78000164 | TR19230 c0_g1_i1 CDS1 | 63            |
| 22 | 0      | 40.73 | 82.19000101 | 75.340003 | 75.34000278 | TR14522 c1_g2_i1 CDS2 | 63            |
| 23 | 40.61  | 40.61 | 86.36000156 | 86.360002 | 81.36000037 | TR18707 c0_g1_i1 CDS1 | 43            |
| 24 | 39.82  | 39.84 | 68.22000146 | 67.290002 | 63.55000138 | TR23597 c1_g8_i1 CDS1 | 78            |
| 24 | 0      | 39.84 | 68.22000146 | 67.290002 | 63.55000138 | TR23597 c1_g4_i1 CDS1 | 78            |
| 24 | 0      | 39.84 | 91.8900013  | 91.890001 | 91.8900013  | TR23597 c1_g6_i1 CDS1 | 78            |
| 25 | 39.58  | 41.43 | 93.07000041 | 75.25     | 75.24999976 | TR18770 c0_g1_i1 CDS1 | 42            |
| 26 | 39.42  | 39.42 | 89.88999724 | 75.800002 | 62.5        | TR14535 c0_g1_i1 CDS3 | 24            |
| 26 | 0      | 39.42 | 88.55999708 | 75.800002 | 62.5        | TR18128 c0_g1_i1 CDS2 | 24            |
| 27 | 38.2   | 38.2  | 94.80000138 | 84.390002 | 84.39000249 | TR21139 c1_g1_i1 CDS3 | 67            |
| 28 | 37.88  | 37.88 | 81.4800024  | 62.959999 | 62.95999885 | TR17133 c3_g1_i1 CDS1 | 44            |
| 29 | 37.19  | 37.19 | 57.0299983  | 52.969998 | 51.0800004  | TR22084 c0_g1_i1 CDS1 | 26            |
| 30 | 36.78  | 36.78 | 69.37999725 | 59.549999 | 59.54999924 | TR20255 c0_g1_i1 CDS1 | 25            |
| 31 | 36.14  | 36.14 | 69.48000193 | 65.41     | 61.33999825 | TR20170 c1_g1_i1 CDS1 | 27            |
| 32 | 35.45  | 35.45 | 73.22000265 | 69.04     | 65.2700007  | TR23063 c0_g1_i2 CDS1 | 31            |
| 33 | 35.17  | 42.29 | 70.42000294 | 55.500001 | 48.4100014  | TR22816 c0_g1_i1 CDS1 | 26            |
| 34 | 34.65  | 34.68 | 76.46999955 | 69.800001 | 67.83999801 | TR17674 c0_g1_i1 CDS2 | 40            |

|    |       |       |             |           |             |                        |     |
|----|-------|-------|-------------|-----------|-------------|------------------------|-----|
| 35 | 34.38 | 39.41 | 87.15999722 | 84.399998 | 82.10999966 | TR18693 c0_g1_i1 CDS1  | 33  |
| 36 | 34.16 | 34.16 | 95.34999728 | 89.529997 | 89.52999711 | TR20046 c0_g1_i2 CDS1  | 58  |
| 37 | 34.02 | 34.02 | 80.37999868 | 66.790003 | 66.79000258 | TR20969 c0_g1_i1 CDS1  | 40  |
| 38 | 33.38 | 37.41 | 85.55999994 | 76.169997 | 76.16999745 | TR21550 c0_g1_i1 CDS1  | 34  |
| 39 | 33.15 | 33.15 | 85.85000038 | 80.190003 | 77.35999823 | TR18613 c0_g1_i1 CDS1  | 30  |
| 40 | 32.97 | 32.97 | 54.60000038 | 48.469999 | 40.70000052 | TR24034 c3_g1_i4 CDS1  | 16  |
| 41 | 32.34 | 32.34 | 69.37000155 | 59.689999 | 59.16000009 | TR15320 c0_g1_i1 CDS3  | 29  |
| 42 | 32.02 | 32.02 | 61.43000126 | 61.430001 | 61.43000126 | TR17861 c0_g1_i2 CDS2  | 30  |
| 43 | 30.43 | 30.43 | 49.70000088 | 39.08     | 31.8599999  | TR18551 c0_g1_i1 CDS2  | 22  |
| 44 | 29.26 | 29.28 | 84.65999961 | 81.599998 | 73.00999761 | TR23419 c0_g15_i1 CDS1 | 53  |
| 45 | 28.75 | 63.57 | 96.82999849 | 90.499997 | 90.49999714 | TR24861 c1_g19_i4 CDS1 | 110 |
| 46 | 27.9  | 27.9  | 67.61000156 | 61.269999 | 61.26999855 | TR24569 c0_g6_i1 CDS1  | 27  |
| 47 | 27.87 | 31.85 | 87.63999939 | 81.650001 | 79.03000116 | TR23063 c0_g1_i3 CDS1  | 31  |
| 48 | 26.66 | 26.66 | 97.46000171 | 97.460002 | 91.53000116 | TR5441 c0_g2_i1 CDS1   | 34  |
| 49 | 26.29 | 32.84 | 76.03999972 | 67.71     | 60.93999743 | TR24122 c1_g2_i5 CDS1  | 36  |
| 50 | 26.01 | 26.01 | 81.97000027 | 81.97     | 80.33000231 | TR19632 c0_g2_i1 CDS1  | 34  |
| 51 | 25.91 | 25.91 | 57.31999874 | 51.050001 | 48.53999913 | TR19364 c1_g1_i1 CDS1  | 21  |
| 52 | 25.7  | 25.7  | 77.68999934 | 64.880002 | 62.40000129 | TR23050 c0_g2_i1 CDS7  | 14  |
| 53 | 25.59 | 25.59 | 86.9599998  | 74.529999 | 70.19000053 | TR24569 c0_g3_i1 CDS2  | 18  |
| 53 | 0     | 24.76 | 84.46999788 | 74.529999 | 64.60000277 | TR24569 c0_g3_i2 CDS2  | 17  |
| 54 | 24.93 | 32.44 | 91.39999747 | 87.099999 | 87.09999919 | TR13307 c0_g3_i1 CDS1  | 76  |
| 54 | 0     | 32.44 | 91.39999747 | 87.099999 | 87.09999919 | TR13307 c0_g2_i1 CDS1  | 76  |
| 55 | 24.81 | 24.81 | 78.22999954 | 70.069999 | 70.0699985  | TR20889 c1_g2_i2 CDS2  | 25  |
| 55 | 0     | 24.81 | 78.22999954 | 70.069999 | 70.0699985  | TR20889 c1_g2_i1 CDS1  | 25  |
| 56 | 24.7  | 24.93 | 65.63000083 | 61.979997 | 58.32999945 | TR24403 c1_g2_i2 CDS1  | 28  |
| 57 | 24.59 | 24.71 | 77.54999995 | 63.950002 | 59.85999703 | TR10278 c0_g1_i1 CDS1  | 25  |
| 57 | 0.03  | 24.71 | 77.54999995 | 63.950002 | 59.85999703 | TR10278 c0_g3_i1 CDS1  | 23  |
| 58 | 23.35 | 29.12 | 81.51999712 | 76.300001 | 70.1399982  | TR7566 c0_g2_i1 CDS1   | 39  |
| 58 | 0     | 27.08 | 81.51999712 | 73.460001 | 67.29999781 | TR7566 c0_g1_i1 CDS1   | 38  |
| 59 | 23.04 | 30.26 | 90.71999788 | 82.47     | 68.04000139 | TR18770 c2_g11_i1 CDS1 | 36  |
| 59 | 0     | 30.26 | 89.28999901 | 78.570002 | 78.57000232 | TR18770 c2_g2_i1 CDS1  | 36  |
| 60 | 22.92 | 34.76 | 59.52000022 | 46.900001 | 36.43000126 | TR17723 c0_g1_i1 CDS1  | 26  |
| 61 | 22.75 | 22.95 | 81.51999712 | 81.519997 | 68.48000288 | TR15592 c0_g1_i1 CDS2  | 24  |
| 62 | 22.04 | 36.47 | 94.37000155 | 88.730001 | 88.73000145 | TR24670 c2_g1_i1 CDS2  | 119 |
| 63 | 21.89 | 23.59 | 78.94999981 | 57.889998 | 56.58000112 | TR17276 c0_g1_i1 CDS2  | 19  |
| 64 | 21.85 | 22.04 | 68.83999705 | 57.880002 | 57.88000226 | TR20502 c0_g2_i1 CDS1  | 13  |
| 65 | 21.84 | 21.85 | 76.46999955 | 69.999999 | 69.99999881 | TR20861 c1_g1_i1 CDS4  | 27  |
| 66 | 21.28 | 21.28 | 75.63999891 | 64.099997 | 64.09999728 | TR14500 c0_g1_i1 CDS1  | 26  |
| 67 | 20.04 | 20.04 | 57.13999867 | 53.710002 | 53.71000171 | TR16784 c0_g1_i1 CDS2  | 25  |
| 68 | 20.02 | 20.02 | 60.74000001 | 54.809999 | 54.80999947 | TR19075 c0_g1_i2 CDS2  | 11  |
| 69 | 19.3  | 29.13 | 80.97000122 | 69.029999 | 69.02999878 | TR24122 c1_g2_i6 CDS3  | 28  |
| 69 | 0     | 29.13 | 80.97000122 | 69.029999 | 69.02999878 | TR24122 c1_g2_i1 CDS2  | 28  |
| 70 | 19.24 | 21.42 | 85.29000282 | 85.290003 | 83.32999945 | TR24569 c0_g10_i1 CDS2 | 15  |
| 71 | 19.23 | 19.23 | 56.27999902 | 45.899999 | 43.16999912 | TR16224 c0_g1_i1 CDS1  | 16  |
| 72 | 19.04 | 25.04 | 85.32000184 | 85.320002 | 85.32000184 | TR24670 c2_g4_i1 CDS1  | 38  |

|     |       |       |             |           |             |                        |    |
|-----|-------|-------|-------------|-----------|-------------|------------------------|----|
| 73  | 18.61 | 18.61 | 59.78999734 | 56.699997 | 56.69999719 | TR21070 c0_g4_i1 CDS2  | 19 |
| 73  | 0     | 18.61 | 59.78999734 | 56.699997 | 56.69999719 | TR20772 c0_g2_i1 CDS1  | 19 |
| 74  | 18    | 18    | 56.36000037 | 51.819998 | 51.81999803 | TR10789 c0_g2_i1 CDS2  | 17 |
| 75  | 18    | 18    | 83.14999938 | 69.099998 | 69.09999847 | TR19024 c0_g2_i2 CDS2  | 13 |
| 75  | 0     | 18    | 83.14999938 | 69.099998 | 69.09999847 | TR19024 c0_g2_i1 CDS2  | 13 |
| 76  | 17.71 | 17.71 | 70.0699985  | 63.499999 | 54.00999784 | TR24598 c0_g17_i2 CDS1 | 11 |
| 77  | 17.7  | 19.75 | 76.3199985  | 63.160002 | 61.83999777 | TR20957 c0_g3_i1 CDS2  | 24 |
| 77  | 0     | 19.75 | 82.81000257 | 75        | 73.43999743 | TR19470 c2_g2_i1 CDS2  | 24 |
| 77  | 0     | 19.75 | 71.61999941 | 64.859998 | 63.51000071 | TR19470 c2_g10_i1 CDS1 | 24 |
| 78  | 17.55 | 17.55 | 55.07000089 | 55.070001 | 55.07000089 | TR16094 c1_g1_i1 CDS1  | 19 |
| 79  | 17.26 | 18.22 | 55.93000054 | 34.18     | 27.68000066 | TR21868 c2_g1_i1 CDS1  | 9  |
| 80  | 17.11 | 20.49 | 46.88999951 | 40.25     | 40.25000036 | TR18753 c0_g2_i1 CDS1  | 11 |
| 81  | 16.75 | 16.79 | 41.17999971 | 35.879999 | 35.8799994  | TR22070 c0_g1_i1 CDS2  | 8  |
| 82  | 16.35 | 17.81 | 78.38000059 | 47.299999 | 47.299999   | TR20957 c0_g2_i1 CDS2  | 27 |
| 83  | 16.14 | 16.14 | 71.42999768 | 59.05     | 59.04999971 | TR24598 c0_g7_i1 CDS1  | 11 |
| 83  | 0     | 16.14 | 71.42999768 | 59.05     | 59.04999971 | TR24598 c0_g13_i1 CDS1 | 11 |
| 84  | 15.59 | 15.59 | 52.75999904 | 50.389999 | 50.38999915 | TR697 c0_g1_i1 CDS5    | 11 |
| 85  | 15.52 | 15.52 | 81.29000068 | 66.909999 | 62.58999705 | TR24693 c0_g25_i4 CDS1 | 9  |
| 86  | 15.34 | 35.75 | 77.45000124 | 60.780001 | 58.1700027  | TR24398 c1_g1_i6 CDS1  | 22 |
| 87  | 15.24 | 15.24 | 82.78999925 | 52.460003 | 52.4600029  | TR24693 c0_g24_i1 CDS2 | 12 |
| 88  | 14.99 | 14.99 | 78.75000238 | 57.499999 | 54.36999798 | TR14597 c0_g1_i1 CDS3  | 12 |
| 89  | 14.84 | 34.62 | 97.86000252 | 95.190001 | 85.0300014  | TR23970 c2_g2_i1 CDS2  | 42 |
| 90  | 14.74 | 14.74 | 84.76999998 | 54.970002 | 49.00999963 | TR24676 c1_g20_i2 CDS1 | 18 |
| 91  | 14.32 | 31.74 | 86.14000082 | 86.140001 | 80.19999862 | TR24861 c1_g24_i2 CDS1 | 77 |
| 92  | 14.07 | 15.35 | 49.41000044 | 32.06     | 28.2400012  | TR24172 c0_g1_i4 CDS1  | 8  |
| 93  | 13.92 | 14.44 | 44.11999881 | 30.720001 | 28.09999883 | TR24015 c0_g1_i5 CDS2  | 7  |
| 94  | 13.88 | 32.39 | 65.57000279 | 60.329998 | 55.4099977  | TR24122 c1_g2_i4 CDS2  | 25 |
| 95  | 13.48 | 15.21 | 56.94000125 | 39.579999 | 37.85000145 | TR21868 c1_g1_i1 CDS1  | 8  |
| 96  | 13.36 | 13.36 | 33.57999921 | 33.579999 | 33.57999921 | TR20089 c0_g1_i1 CDS1  | 12 |
| 97  | 13.18 | 28.3  | 100         | 92.110002 | 92.11000204 | TR16426 c0_g2_i1 CDS2  | 59 |
| 98  | 12.72 | 13.76 | 85.92000008 | 85.92     | 85.92000008 | TR18690 c0_g6_i1 CDS2  | 34 |
| 98  | 0     | 15.13 | 77.4600029  | 77.460003 | 77.4600029  | TR18690 c0_g3_i1 CDS1  | 34 |
| 98  | 0     | 13.76 | 85.92000008 | 85.92     | 85.92000008 | TR18690 c0_g5_i1 CDS1  | 34 |
| 98  | 0     | 13.76 | 85.92000008 | 85.92     | 85.92000008 | TR18690 c0_g1_i1 CDS1  | 34 |
| 98  | 0     | 10.78 | 85.92000008 | 85.92     | 56.33999705 | TR18690 c0_g4_i1 CDS1  | 31 |
| 99  | 12.6  | 12.6  | 70.59000134 | 70.590001 | 63.73000145 | TR24403 c1_g8_i2 CDS2  | 21 |
| 99  | 0     | 12.6  | 70.59000134 | 70.590001 | 63.73000145 | TR24403 c1_g8_i1 CDS2  | 21 |
| 99  | 0     | 12.6  | 70.59000134 | 70.590001 | 63.73000145 | TR10032 c1_g1_i1 CDS1  | 21 |
| 100 | 12.48 | 14.57 | 70.1300025  | 55.839998 | 55.83999753 | TR20957 c0_g1_i1 CDS2  | 26 |
| 100 | 0     | 14.57 | 70.1300025  | 55.839998 | 55.83999753 | TR19470 c2_g3_i1 CDS2  | 26 |
| 101 | 12.4  | 12.82 | 98.90999794 | 85.869998 | 80.43000102 | TR23314 c3_g4_i2 CDS1  | 16 |
| 102 | 12.08 | 12.08 | 71.84000015 | 39.809999 | 39.80999887 | TR21511 c0_g1_i6 CDS2  | 6  |
| 102 | 0     | 12.08 | 71.84000015 | 39.809999 | 39.80999887 | TR21511 c0_g1_i5 CDS1  | 6  |
| 102 | 0     | 12.08 | 71.84000015 | 39.809999 | 39.80999887 | TR21511 c0_g1_i4 CDS1  | 6  |
| 102 | 0     | 12.08 | 71.84000015 | 39.809999 | 39.80999887 | TR21511 c0_g1_i3 CDS1  | 6  |

|     |       |       |             |           |             |                        |    |
|-----|-------|-------|-------------|-----------|-------------|------------------------|----|
| 102 | 0     | 12.08 | 71.84000015 | 39.809999 | 39.80999887 | TR21511 c0_g1_i2 CDS2  | 6  |
| 102 | 0     | 12.08 | 71.84000015 | 39.809999 | 39.80999887 | TR21511 c0_g1_i1 CDS1  | 6  |
| 102 | 0     | 12.08 | 71.84000015 | 39.809999 | 39.80999887 | TR11788 c0_g1_i1 CDS3  | 6  |
| 103 | 12.06 | 12.06 | 68.22999716 | 43.23     | 43.23000014 | TR23050 c0_g2_i1 CDS1  | 9  |
| 104 | 11.85 | 11.87 | 59.21000242 | 56.580001 | 56.58000112 | TR17276 c0_g3_i1 CDS2  | 13 |
| 105 | 11.77 | 11.77 | 28.24999988 | 23.09     | 23.09000045 | TR24353 c1_g2_i2 CDS1  | 7  |
| 105 | 0     | 9.74  | 28.0400008  | 21.439999 | 21.43999934 | TR24353 c1_g2_i3 CDS1  | 6  |
| 106 | 11.54 | 14    | 89.60999846 | 89.609998 | 89.60999846 | TR19498 c0_g4_i1 CDS1  | 10 |
| 106 | 0.01  | 14    | 89.60999846 | 89.609998 | 89.60999846 | TR19498 c0_g3_i1 CDS1  | 12 |
| 107 | 11.2  | 11.2  | 37.05999851 | 30.989999 | 29.06999886 | TR20632 c0_g1_i1 CDS1  | 6  |
| 108 | 11.11 | 11.11 | 38.40000033 | 25.2      | 25.20000041 | TR27662 c0_g1_i1 CDS3  | 6  |
| 109 | 10.73 | 22    | 95.08000016 | 88.520002 | 88.52000237 | TR30849 c0_g1_i1 CDS2  | 19 |
| 110 | 10.55 | 10.55 | 45.41000128 | 42.359999 | 36.68000102 | TR20240 c0_g1_i1 CDS1  | 11 |
| 111 | 10.42 | 17.46 | 54.89000082 | 54.890001 | 51.09000206 | TR21550 c0_g2_i1 CDS1  | 12 |
| 112 | 10.26 | 14.32 | 74.36000109 | 61.540002 | 51.27999783 | TR11265 c0_g1_i1 CDS1  | 10 |
| 113 | 10.09 | 10.09 | 52.63000131 | 52.630001 | 52.63000131 | TR18971 c0_g13_i1 CDS1 | 9  |
| 113 | 0     | 9.78  | 52.63000131 | 52.630001 | 52.63000131 | TR18971 c0_g15_i1 CDS1 | 9  |
| 113 | 0     | 8.01  | 43.84000003 | 43.84     | 43.84000003 | TR18971 c0_g6_i1 CDS3  | 8  |
| 113 | 0     | 8.01  | 43.84000003 | 43.84     | 43.84000003 | TR18971 c0_g3_i1 CDS2  | 8  |
| 114 | 10.01 | 10.01 | 26.64000094 | 12.87     | 12.87000003 | TR21895 c0_g1_i1 CDS1  | 5  |
| 115 | 10    | 10    | 81.40000105 | 30.230001 | 30.23000062 | TR6481 c0_g2_i1 CDS1   | 9  |
| 115 | 0     | 10    | 44.87000108 | 33.329999 | 33.32999945 | TR16482 c0_g1_i1 CDS1  | 9  |
| 115 | 0     | 10    | 45.59000134 | 38.240001 | 38.24000061 | TR6481 c0_g1_i1 CDS1   | 9  |
| 116 | 10    | 10    | 62.33999729 | 62.339997 | 62.33999729 | TR4154 c0_g2_i1 CDS2   | 5  |
| 116 | 0     | 8     | 61.04000211 | 61.040002 | 61.04000211 | TR4154 c0_g1_i1 CDS2   | 4  |
| 117 | 10    | 10    | 25.67000091 | 20.299999 | 20.29999942 | TR22181 c0_g1_i1 CDS2  | 5  |
| 118 | 10    | 10    | 26.08999908 | 12.5      | 12.5        | TR13710 c0_g1_i1 CDS1  | 6  |
| 119 | 10    | 10    | 61.90000176 | 53.170002 | 53.17000151 | TR7650 c0_g1_i1 CDS2   | 5  |
| 120 | 10    | 10    | 56.02999926 | 56.029999 | 56.02999926 | TR7596 c0_g2_i1 CDS2   | 12 |
| 121 | 10    | 10    | 37.16000021 | 37.16     | 37.16000021 | TR22217 c0_g1_i2 CDS1  | 7  |
| 121 | 0     | 10    | 37.16000021 | 37.16     | 37.16000021 | TR22217 c0_g1_i1 CDS1  | 7  |
| 122 | 9.89  | 9.89  | 43.23999882 | 43.239999 | 43.23999882 | TR17389 c0_g1_i1 CDS1  | 5  |
| 123 | 9.85  | 9.85  | 42.86000133 | 41.56     | 41.56000018 | TR13891 c0_g1_i1 CDS2  | 9  |
| 124 | 9.71  | 30.54 | 68.56999993 | 68.57     | 68.56999993 | TR18979 c0_g1_i1 CDS1  | 47 |
| 125 | 9.52  | 9.52  | 37.79000044 | 23.93     | 13.52999955 | TR24679 c0_g6_i1 CDS2  | 6  |
| 126 | 9.22  | 9.22  | 59.57000256 | 59.570003 | 59.57000256 | TR24403 c1_g2_i3 CDS1  | 7  |
| 127 | 8.96  | 8.96  | 64.46999907 | 64.469999 | 64.46999907 | TR17575 c1_g2_i1 CDS2  | 11 |
| 127 | 0     | 8.96  | 64.46999907 | 64.469999 | 64.46999907 | TR17575 c1_g1_i1 CDS2  | 11 |
| 127 | 0     | 8.96  | 64.46999907 | 64.469999 | 64.46999907 | TR17575 c0_g1_i1 CDS1  | 11 |
| 128 | 8.7   | 8.7   | 46.2500006  | 37.5      | 37.5        | TR18971 c0_g5_i1 CDS3  | 6  |
| 128 | 0     | 8.7   | 62.70999908 | 50.849998 | 50.849998   | TR16575 c1_g1_i1 CDS1  | 6  |
| 129 | 8.64  | 10.78 | 51.45000219 | 29.480001 | 24.27999973 | TR15180 c0_g1_i1 CDS2  | 6  |
| 130 | 8.51  | 21.34 | 69.73999739 | 57.889998 | 57.88999796 | TR17276 c0_g2_i1 CDS1  | 20 |
| 131 | 8.34  | 13.89 | 93.75       | 67.860001 | 67.86000133 | TR24693 c0_g13_i1 CDS1 | 9  |
| 132 | 8.22  | 8.22  | 48.03000093 | 33.860001 | 28.34999859 | TR7977 c0_g2_i1 CDS2   | 6  |

|     |      |       |             |           |             |                        |    |
|-----|------|-------|-------------|-----------|-------------|------------------------|----|
| 132 | 0    | 8.22  | 49.1899997  | 34.68     | 29.03000116 | TR12929 c0_g1_i1 CDS2  | 6  |
| 133 | 8.01 | 12.01 | 51.55000091 | 42.269999 | 35.56999862 | TR20772 c0_g3_i1 CDS4  | 7  |
| 134 | 8    | 23.9  | 77.17000246 | 77.170002 | 71.64999843 | TR24861 c1_g28_i1 CDS1 | 29 |
| 135 | 8    | 8     | 68.48999858 | 52.05     | 46.57999873 | TR11442 c0_g1_i1 CDS1  | 5  |
| 136 | 8    | 8     | 63.1099999  | 29.13     | 29.12999988 | TR23314 c2_g9_i1 CDS1  | 9  |
| 136 | 0    | 8     | 57.0200026  | 26.320001 | 26.32000148 | TR23314 c2_g8_i1 CDS2  | 9  |
| 136 | 0    | 8     | 57.0200026  | 26.320001 | 26.32000148 | TR23314 c2_g6_i1 CDS2  | 9  |
| 136 | 0    | 8     | 53.50999832 | 26.320001 | 26.32000148 | TR23314 c2_g4_i1 CDS2  | 9  |
| 136 | 0    | 8     | 53.50999832 | 26.320001 | 26.32000148 | TR23314 c2_g2_i1 CDS2  | 9  |
| 136 | 0    | 6.51  | 55.08000255 | 28.81     | 28.81000042 | TR23314 c2_g3_i1 CDS1  | 7  |
| 137 | 8    | 8     | 27.03000009 | 16.859999 | 16.8599993  | TR21936 c0_g1_i1 CDS4  | 4  |
| 138 | 8    | 8     | 91.43000245 | 67.619997 | 67.61999726 | TR16190 c0_g2_i1 CDS3  | 7  |
| 139 | 7.86 | 7.86  | 31.99999928 | 18.4      | 18.40000004 | TR17034 c0_g1_i1 CDS2  | 4  |
| 139 | 0    | 7.86  | 27.9700011  | 16.08     | 16.07999951 | TR12023 c0_g3_i1 CDS2  | 4  |
| 139 | 0    | 7.86  | 27.9700011  | 16.08     | 16.07999951 | TR12023 c0_g2_i1 CDS2  | 4  |
| 139 | 0    | 7.86  | 27.9700011  | 16.08     | 16.07999951 | TR12023 c0_g1_i1 CDS2  | 4  |
| 140 | 7.74 | 7.74  | 35.2699995  | 28.729999 | 28.72999907 | TR17179 c0_g1_i1 CDS3  | 5  |
| 141 | 7.72 | 7.72  | 85.71000099 | 78.570002 | 67.14000106 | TR23314 c3_g4_i1 CDS1  | 12 |
| 142 | 7.49 | 7.49  | 33.79999995 | 28.7      | 24.07000065 | TR21728 c0_g1_i1 CDS1  | 5  |
| 143 | 7.17 | 7.17  | 52.07999945 | 52.079999 | 52.07999945 | TR23529 c0_g1_i2 CDS2  | 7  |
| 143 | 0    | 7.17  | 52.07999945 | 52.079999 | 52.07999945 | TR23529 c0_g10_i2 CDS2 | 7  |
| 143 | 0    | 6     | 65.14999866 | 65.149999 | 65.14999866 | TR23529 c0_g17_i1 CDS2 | 6  |
| 144 | 7.15 | 7.15  | 10.57000011 | 8.5900001 | 8.590000123 | TR33137 c0_g1_i1 CDS1  | 4  |
| 144 | 0    | 5.06  | 13.39000016 | 6.696     | 6.69599995  | TR22764 c1_g1_i1 CDS2  | 3  |
| 145 | 6.84 | 8.2   | 96.05000019 | 81.580001 | 81.58000112 | TR24241 c0_g4_i1 CDS2  | 10 |
| 145 | 0    | 8.2   | 96.05000019 | 81.580001 | 81.58000112 | TR24241 c0_g2_i1 CDS2  | 10 |
| 145 | 0    | 8.13  | 96.05000019 | 81.580001 | 81.58000112 | TR24241 c0_g3_i1 CDS2  | 10 |
| 145 | 0    | 6.78  | 86.44000292 | 77.969998 | 77.96999812 | TR24241 c0_g8_i1 CDS1  | 7  |
| 145 | 0    | 6.78  | 86.44000292 | 77.969998 | 77.96999812 | TR24241 c0_g6_i1 CDS1  | 7  |
| 145 | 0    | 6.78  | 86.44000292 | 77.969998 | 77.96999812 | TR24241 c0_g5_i1 CDS1  | 7  |
| 145 | 0    | 6.78  | 86.44000292 | 77.969998 | 77.96999812 | TR24241 c0_g10_i1 CDS1 | 7  |
| 146 | 6.59 | 13.03 | 77.13999748 | 57.139999 | 52.13999748 | TR24676 c1_g1_i1 CDS2  | 17 |
| 146 | 0    | 8.58  | 83.99999738 | 69.330001 | 68.00000072 | TR24676 c1_g18_i1 CDS2 | 10 |
| 147 | 6.44 | 21.72 | 96.89999819 | 96.899998 | 70.53999901 | TR24861 c1_g28_i2 CDS1 | 30 |
| 147 | 0    | 21.72 | 77.17000246 | 77.170002 | 71.64999843 | TR24861 c1_g28_i3 CDS2 | 30 |
| 148 | 6.41 | 16.1  | 51.46999955 | 51.47     | 51.46999955 | TR16094 c2_g1_i1 CDS1  | 46 |
| 149 | 6.38 | 6.38  | 52.17000246 | 36.230001 | 24.63999987 | TR22155 c0_g6_i1 CDS1  | 3  |
| 150 | 6.29 | 10.33 | 68.4499979  | 66.070002 | 42.86000133 | TR16285 c0_g1_i1 CDS1  | 5  |
| 151 | 6.28 | 8.35  | 84.61999893 | 53.850001 | 53.8500011  | TR3944 c0_g1_i1 CDS2   | 6  |
| 151 | 0    | 6.36  | 84.61999893 | 51.279998 | 34.61999893 | TR10447 c0_g2_i1 CDS2  | 4  |
| 151 | 0    | 6.36  | 84.61999893 | 51.279998 | 34.61999893 | TR10447 c0_g1_i1 CDS2  | 4  |
| 151 | 0    | 6.36  | 92.41999984 | 60.610002 | 40.90999961 | TR10447 c0_g3_i1 CDS2  | 4  |
| 152 | 6.23 | 6.23  | 23.01999927 | 23.019999 | 17.46000051 | TR275 c0_g2_i1 CDS2    | 3  |
| 152 | 0    | 4.2   | 15.56999981 | 15.57     | 9.836000204 | TR275 c0_g1_i1 CDS2    | 2  |
| 153 | 6.18 | 15.4  | 100         | 66.670001 | 66.67000055 | TR24861 c1_g31_i1 CDS2 | 26 |

|     |      |       |             |           |             |                        |    |
|-----|------|-------|-------------|-----------|-------------|------------------------|----|
| 153 | 0    | 32.88 | 100         | 82.349998 | 82.34999776 | TR20046 c0_g1_i3 CDS1  | 56 |
| 153 | 0    | 28.38 | 96.29999995 | 82.72     | 82.71999955 | TR24861 c1_g20_i1 CDS1 | 47 |
| 153 | 0    | 16.41 | 100         | 66.670001 | 66.67000055 | TR24861 c1_g9_i2 CDS2  | 27 |
| 153 | 0    | 16.41 | 100         | 66.670001 | 66.67000055 | TR24861 c1_g9_i1 CDS3  | 27 |
| 153 | 0    | 14.27 | 87.5        | 71.880001 | 71.88000083 | TR24861 c1_g8_i1 CDS2  | 26 |
| 154 | 6.13 | 6.19  | 26.19000077 | 9.9569999 | 8.224999905 | TR19570 c0_g1_i1 CDS1  | 3  |
| 154 | 0    | 6.19  | 26.19000077 | 9.9569999 | 8.224999905 | TR18872 c0_g1_i1 CDS2  | 3  |
| 155 | 6.11 | 20.25 | 74.36000109 | 64.099997 | 64.09999728 | TR15501 c0_g1_i1 CDS1  | 22 |
| 155 | 0    | 20.41 | 75.63999891 | 64.099997 | 64.09999728 | TR15501 c0_g3_i1 CDS1  | 23 |
| 155 | 0    | 20.25 | 74.36000109 | 64.099997 | 64.09999728 | TR14500 c0_g2_i1 CDS1  | 22 |
| 156 | 6.11 | 6.11  | 51.34999752 | 45.050001 | 39.64000046 | TR991 c0_g1_i1 CDS1    | 15 |
| 157 | 6.07 | 40.24 | 63.67999911 | 55.690002 | 54.24000025 | TR23612 c0_g1_i1 CDS1  | 34 |
| 158 | 6.07 | 15.06 | 83.79999995 | 61.970001 | 54.22999859 | TR24598 c0_g18_i1 CDS2 | 8  |
| 158 | 0    | 12.95 | 94.67999935 | 71.280003 | 71.28000259 | TR24598 c0_g4_i1 CDS2  | 7  |
| 159 | 6.07 | 6.07  | 34.09000039 | 30.3      | 30.30000031 | TR13276 c0_g1_i2 CDS2  | 4  |
| 159 | 0    | 4.05  | 29.06000018 | 18.799999 | 18.79999936 | TR13276 c0_g1_i1 CDS3  | 3  |
| 160 | 6.06 | 6.06  | 54.17000055 | 40.000001 | 40.0000006  | TR13655 c0_g2_i1 CDS1  | 3  |
| 160 | 0    | 6.06  | 48.33000004 | 40.000001 | 40.0000006  | TR13655 c0_g1_i1 CDS1  | 3  |
| 161 | 6.02 | 16.11 | 67.61999726 | 52.380002 | 52.38000154 | TR24676 c1_g12_i1 CDS1 | 22 |
| 161 | 0.01 | 20.52 | 56.8599999  | 47.710001 | 47.71000147 | TR24676 c1_g4_i1 CDS1  | 24 |
| 161 | 0    | 14.1  | 55.23999929 | 40.000001 | 40.0000006  | TR24676 c1_g16_i1 CDS1 | 18 |
| 162 | 6.01 | 17.08 | 93.33000183 | 81.330001 | 81.33000135 | TR24861 c1_g23_i1 CDS3 | 27 |
| 162 | 0    | 13.04 | 67.69000292 | 67.690003 | 67.69000292 | TR24861 c1_g26_i1 CDS3 | 18 |
| 163 | 6    | 40.08 | 99.08000231 | 95.410001 | 87.15999722 | TR24670 c2_g29_i1 CDS2 | 92 |
| 164 | 6    | 32.84 | 77.07999945 | 69.79     | 64.06000257 | TR24122 c1_g2_i2 CDS2  | 39 |
| 165 | 6    | 31.72 | 96.50999904 | 89.529997 | 89.52999711 | TR24861 c1_g18_i1 CDS1 | 44 |
| 166 | 6    | 31.5  | 77.53000259 | 73.409998 | 70.03999949 | TR23063 c0_g1_i5 CDS1  | 29 |
| 167 | 6    | 15.24 | 68.56999993 | 58.099997 | 58.09999704 | TR24693 c0_g4_i1 CDS2  | 10 |
| 167 | 0    | 14.03 | 67.77999997 | 54.439998 | 54.43999767 | TR24693 c0_g9_i1 CDS2  | 9  |
| 167 | 0    | 9.07  | 66.22999907 | 55.839998 | 55.83999753 | TR24693 c0_g6_i1 CDS2  | 6  |
| 167 | 0    | 6.07  | 62.30000257 | 52.460003 | 52.4600029  | TR24693 c0_g27_i1 CDS2 | 3  |
| 167 | 0    | 6.07  | 62.30000257 | 52.460003 | 52.4600029  | TR24693 c0_g20_i1 CDS2 | 3  |
| 167 | 0    | 4     | 39.21999931 | 39.219999 | 39.21999931 | TR24693 c0_g14_i1 CDS2 | 2  |
| 168 | 6    | 14    | 78.22999954 | 59.179997 | 59.17999744 | TR20889 c1_g1_i1 CDS1  | 17 |
| 168 | 0    | 14    | 72.72999883 | 53.149998 | 53.14999819 | TR20889 c1_g1_i2 CDS1  | 17 |
| 169 | 6    | 8     | 33.6499989  | 33.649999 | 33.6499989  | TR13177 c0_g3_i1 CDS2  | 4  |
| 169 | 0    | 8     | 33.6499989  | 33.649999 | 33.6499989  | TR13177 c0_g1_i1 CDS2  | 4  |
| 169 | 0    | 6     | 42.86000133 | 42.860001 | 42.86000133 | TR13177 c0_g2_i1 CDS2  | 3  |
| 170 | 6    | 6     | 23.17000031 | 12.93     | 10.72999984 | TR14264 c0_g1_i1 CDS1  | 3  |
| 170 | 0    | 6     | 19.07999963 | 11.62     | 9.649000317 | TR23903 c0_g4_i2 CDS2  | 3  |
| 170 | 0    | 6     | 19.2900002  | 11.75     | 9.75600034  | TR23903 c0_g4_i1 CDS3  | 3  |
| 171 | 6    | 6     | 64.37000036 | 64.37     | 64.37000036 | TR16754 c0_g1_i1 CDS1  | 4  |
| 172 | 6    | 6     | 45.95000148 | 45.950001 | 45.95000148 | TR16413 c1_g1_i1 CDS1  | 4  |
| 173 | 5.92 | 8     | 73.55999947 | 54.02     | 54.0199995  | TR24693 c0_g12_i1 CDS1 | 4  |
| 174 | 5.87 | 18.1  | 68.41999888 | 61.839998 | 61.83999777 | TR19470 c2_g5_i1 CDS2  | 18 |



|     |      |       |             |           |             |                        |     |
|-----|------|-------|-------------|-----------|-------------|------------------------|-----|
| 175 | 5.82 | 12    | 60.00000238 | 52.219999 | 52.21999884 | TR19498 c0_g1_i1 CDS1  | 8   |
| 176 | 5.47 | 5.47  | 42.96000004 | 25.929999 | 25.92999935 | TR19643 c0_g1_i2 CDS8  | 3   |
| 176 | 0    | 5.47  | 42.96000004 | 25.929999 | 25.92999935 | TR19643 c0_g1_i1 CDS3  | 3   |
| 177 | 5.39 | 12.52 | 85.58999896 | 66.949999 | 55.93000054 | TR17681 c0_g1_i1 CDS2  | 11  |
| 177 | 0    | 12.12 | 76.27000213 | 47.459999 | 42.37000048 | TR17681 c0_g3_i1 CDS2  | 10  |
| 178 | 5.13 | 34.96 | 91.67000055 | 87.040001 | 87.04000115 | TR19010 c0_g2_i1 CDS1  | 50  |
| 179 | 4.87 | 17.57 | 82.69000053 | 62.5      | 55.76999784 | TR19970 c0_g9_i1 CDS1  | 16  |
| 179 | 0    | 17.57 | 82.69000053 | 62.5      | 55.76999784 | TR19970 c0_g1_i2 CDS1  | 16  |
| 179 | 0    | 17.57 | 58.03999901 | 58.039999 | 51.78999901 | TR19970 c0_g5_i1 CDS1  | 16  |
| 179 | 0    | 8.99  | 36.35999858 | 36.359999 | 36.35999858 | TR19970 c0_g1_i1 CDS1  | 6   |
| 180 | 4.83 | 16.94 | 68.83999705 | 44.220001 | 34.67000127 | TR24403 c1_g2_i1 CDS3  | 18  |
| 181 | 4.57 | 20.38 | 82.38999844 | 76.059997 | 64.07999992 | TR24569 c0_g14_i1 CDS1 | 16  |
| 182 | 4.37 | 48.59 | 85.50999761 | 67.390001 | 59.89999771 | TR24398 c1_g1_i9 CDS2  | 40  |
| 182 | 0    | 47.43 | 81.63999915 | 67.869997 | 60.39000154 | TR24398 c1_g1_i7 CDS1  | 39  |
| 182 | 0    | 45.43 | 71.00999951 | 57.969999 | 50.48000216 | TR24398 c1_g1_i5 CDS1  | 38  |
| 182 | 0    | 32.1  | 69.80999708 | 52.170002 | 42.75000095 | TR24398 c1_g1_i2 CDS1  | 19  |
| 183 | 4.3  | 19.4  | 82.08000064 | 82.080001 | 80.19000292 | TR24569 c0_g10_i4 CDS2 | 13  |
| 183 | 0    | 17.33 | 90.63000083 | 80.21     | 78.13000083 | TR24569 c0_g12_i1 CDS1 | 12  |
| 184 | 4.24 | 4.29  | 34.61999893 | 24.04     | 20.19000053 | TR18837 c0_g4_i1 CDS2  | 3   |
| 184 | 0    | 4.28  | 34.61999893 | 24.04     | 24.04000014 | TR18837 c0_g5_i1 CDS2  | 3   |
| 184 | 0    | 4.28  | 58.06000233 | 40.32     | 40.32000005 | TR18837 c0_g3_i1 CDS2  | 3   |
| 185 | 4.23 | 13.29 | 82.09000023 | 48.51     | 40.29999971 | TR24676 c1_g15_i2 CDS1 | 10  |
| 185 | 0    | 10.77 | 68.48999858 | 52.05     | 45.21000087 | TR24676 c1_g20_i1 CDS2 | 8   |
| 185 | 0    | 9.13  | 54.79000211 | 35.620001 | 35.62000096 | TR24676 c1_g15_i1 CDS2 | 7   |
| 186 | 4.11 | 44.33 | 100         | 100       | 100         | TR23597 c1_g3_i7 CDS3  | 116 |
| 187 | 4.1  | 19.7  | 75.3099978  | 75.309998 | 75.3099978  | TR24861 c1_g3_i1 CDS3  | 30  |
| 188 | 4.08 | 5.8   | 26.01999938 | 12.57     | 12.56999969 | TR14903 c0_g1_i1 CDS1  | 3   |
| 189 | 4.06 | 6.26  | 78.32999825 | 78.329998 | 66.67000055 | TR24569 c0_g28_i1 CDS2 | 4   |
| 190 | 4.04 | 4.04  | 14.49999958 | 8.3970003 | 8.397000283 | TR6338 c0_g1_i1 CDS3   | 2   |
| 190 | 0.02 | 2.09  | 20.40999979 | 7.3469996 | 4.081999883 | TR11559 c0_g1_i6 CDS2  | 1   |
| 190 | 0.02 | 2.09  | 20.40999979 | 7.3469996 | 4.081999883 | TR11559 c0_g1_i1 CDS2  | 1   |
| 190 | 0.02 | 2.09  | 16.32999927 | 7.3469996 | 4.081999883 | TR11559 c0_g1_i5 CDS2  | 1   |
| 190 | 0.02 | 2.09  | 16.32999927 | 7.3469996 | 4.081999883 | TR11559 c0_g1_i3 CDS1  | 1   |
| 190 | 0.02 | 2.09  | 16.32999927 | 7.3469996 | 4.081999883 | TR11559 c0_g1_i2 CDS2  | 1   |
| 191 | 4.03 | 4.03  | 25.45000017 | 16.36     | 16.35999978 | TR15111 c0_g1_i1 CDS1  | 2   |
| 192 | 4.02 | 24.07 | 85.61000228 | 85.610002 | 84.09000039 | TR19632 c1_g1_i1 CDS1  | 34  |
| 193 | 4    | 27.95 | 76.74000263 | 76.740003 | 76.74000263 | TR1026 c0_g1_i1 CDS1   | 31  |
| 194 | 4    | 7.17  | 44.94999945 | 44.949999 | 44.94999945 | TR23529 c0_g1_i1 CDS2  | 9   |
| 194 | 0    | 7.17  | 41.87999964 | 41.88     | 41.87999964 | TR23529 c0_g13_i1 CDS1 | 9   |
| 194 | 0    | 4     | 55.1699996  | 55.17     | 55.1699996  | TR23529 c0_g14_i1 CDS2 | 4   |
| 194 | 0    | 4     | 62.74999976 | 62.75     | 62.74999976 | TR23529 c0_g12_i1 CDS2 | 4   |
| 194 | 0    | 4     | 62.74999976 | 62.75     | 62.74999976 | TR23529 c0_g11_i2 CDS1 | 4   |
| 194 | 0    | 4     | 62.74999976 | 62.75     | 62.74999976 | TR23529 c0_g11_i1 CDS2 | 4   |
| 195 | 4    | 7.12  | 70.14999986 | 62.690002 | 62.69000173 | TR23314 c3_g1_i1 CDS2  | 7   |
| 196 | 4    | 6     | 44.92999911 | 44.929999 | 44.92999911 | TR16094 c2_g3_i1 CDS1  | 14  |

|     |      |       |             |           |             |                        |    |
|-----|------|-------|-------------|-----------|-------------|------------------------|----|
| 197 | 4    | 4.44  | 24.74000007 | 21.65     | 14.42999989 | TR24403 c1_g7_i1 CDS1  | 4  |
| 198 | 4    | 4     | 17.08000004 | 3.0130001 | 2.455000021 | TR15597 c0_g1_i1 CDS3  | 2  |
| 198 | 0    | 2     | 63.2700026  | 10.2      | 10.19999981 | TR7556 c0_g2_i1 CDS1   | 1  |
| 198 | 0    | 2     | 11.14000008 | 3.2609999 | 3.260999918 | TR7187 c0_g1_i1 CDS1   | 1  |
| 198 | 0    | 2     | 65.96000195 | 21.28     | 21.27999961 | TR7556 c0_g1_i1 CDS2   | 1  |
| 199 | 4    | 4     | 28.2400012  | 25.569999 | 18.32000017 | TR30852 c0_g1_i1 CDS1  | 2  |
| 200 | 4    | 4     | 31.25       | 18.23     | 18.23000014 | TR23986 c0_g2_i1 CDS3  | 2  |
| 200 | 0    | 2     | 12.16000021 | 12.16     | 12.16000021 | TR23986 c0_g8_i1 CDS3  | 1  |
| 201 | 4    | 4     | 55.93000054 | 16.38     | 16.38000011 | TR23538 c0_g1_i2 CDS1  | 2  |
| 201 | 0    | 2     | 12.24000007 | 12.24     | 12.24000007 | TR23538 c1_g2_i1 CDS4  | 1  |
| 202 | 4    | 4     | 21.60000056 | 12.68     | 12.68000007 | TR16002 c0_g1_i2 CDS3  | 2  |
| 202 | 0    | 4     | 25.13999939 | 14.749999 | 14.74999934 | TR16002 c0_g1_i1 CDS3  | 2  |
| 203 | 4    | 4     | 18.75       | 18.75     | 18.75       | TR20858 c0_g1_i2 CDS1  | 2  |
| 203 | 0    | 4     | 18.49000007 | 18.49     | 18.49000007 | TR20858 c0_g1_i1 CDS2  | 2  |
| 203 | 0    | 2     | 21.53999954 | 21.54     | 21.53999954 | TR1389 c1_g1_i1 CDS2   | 1  |
| 204 | 4    | 4     | 22.73000032 | 22.73     | 22.73000032 | TR17671 c0_g1_i2 CDS1  | 3  |
| 204 | 0    | 4     | 20.7100004  | 20.71     | 20.7100004  | TR17671 c0_g1_i1 CDS2  | 3  |
| 205 | 3.9  | 25.54 | 68.27999949 | 65.05     | 56.98999763 | TR23419 c0_g6_i1 CDS1  | 30 |
| 206 | 3.7  | 26.49 | 78.45000029 | 77.590001 | 57.76000023 | TR23597 c1_g9_i2 CDS1  | 64 |
| 206 | 0    | 32.7  | 94.51000094 | 94.510001 | 73.62999916 | TR23597 c1_g8_i2 CDS1  | 81 |
| 206 | 0    | 27.79 | 71.28999829 | 67.330003 | 67.33000278 | TR24670 c2_g11_i1 CDS4 | 64 |
| 206 | 0    | 26.49 | 77.59000063 | 74.14     | 57.76000023 | TR23597 c1_g9_i3 CDS1  | 64 |
| 206 | 0    | 17.14 | 62.69000173 | 56.720001 | 56.72000051 | TR24670 c2_g5_i1 CDS4  | 39 |
| 207 | 3.68 | 3.68  | 54.10000086 | 54.100001 | 40.9799993  | TR23538 c1_g1_i1 CDS2  | 3  |
| 207 | 0    | 3.61  | 49.18000102 | 39.340001 | 26.23000145 | TR23538 c1_g5_i1 CDS2  | 2  |
| 207 | 0    | 1.91  | 47.87999988 | 10.3      | 10.30000001 | TR23538 c1_g6_i1 CDS2  | 2  |
| 208 | 3.4  | 3.4   | 16.45999998 | 9.4509996 | 6.706999987 | TR23314 c3_g3_i1 CDS1  | 2  |
| 208 | 0    | 2.93  | 21.17000073 | 11.04     | 6.747999787 | TR23314 c3_g2_i1 CDS1  | 2  |
| 208 | 0    | 2.86  | 46.59999907 | 21.359999 | 21.35999948 | TR23314 c0_g2_i1 CDS1  | 2  |
| 208 | 0    | 2.86  | 46.59999907 | 21.359999 | 21.35999948 | TR23314 c0_g1_i1 CDS1  | 2  |
| 209 | 3.39 | 5.48  | 43.4799999  | 43.48     | 43.4799999  | TR16094 c2_g2_i1 CDS1  | 11 |
| 209 | 0    | 5.48  | 43.4799999  | 43.48     | 43.4799999  | TR16094 c1_g2_i2 CDS2  | 11 |
| 209 | 0    | 5.48  | 43.4799999  | 43.48     | 43.4799999  | TR16094 c1_g2_i1 CDS2  | 11 |
| 210 | 3.19 | 30.14 | 68.56999993 | 68.57     | 68.56999993 | TR17861 c0_g1_i1 CDS3  | 30 |
| 211 | 3.12 | 18.28 | 72.72999883 | 62.629998 | 62.62999773 | TR21139 c0_g1_i1 CDS1  | 30 |
| 212 | 2.94 | 3.02  | 79.68999743 | 79.689997 | 48.44000041 | TR7070 c0_g1_i1 CDS1   | 3  |
| 212 | 0    | 2.58  | 68.75       | 68.75     | 48.44000041 | TR7070 c0_g2_i1 CDS1   | 3  |
| 213 | 2.92 | 2.92  | 67.86000133 | 35.710001 | 35.71000099 | TR19261 c0_g2_i1 CDS1  | 3  |
| 213 | 0    | 2.92  | 31.67999983 | 19.8      | 19.79999989 | TR19261 c0_g3_i1 CDS1  | 3  |
| 214 | 2.89 | 2.89  | 33.32999945 | 25.639999 | 17.94999987 | TR24679 c0_g4_i1 CDS2  | 2  |
| 215 | 2.85 | 5.54  | 32.74999857 | 10.53     | 7.602000237 | TR23549 c0_g3_i1 CDS1  | 4  |
| 215 | 0.01 | 4.98  | 34.09000039 | 10.8      | 7.954999804 | TR23549 c0_g3_i3 CDS1  | 4  |
| 215 | 0    | 2.9   | 20.74999958 | 20.75     | 20.74999958 | TR23549 c0_g2_i1 CDS3  | 2  |
| 216 | 2.74 | 4.81  | 48.60999882 | 47.220001 | 47.22000062 | TR24861 c0_g1_i1 CDS1  | 9  |
| 217 | 2.55 | 26.72 | 83.7199986  | 79.070002 | 74.41999912 | TR23419 c0_g3_i1 CDS2  | 25 |

|     |      |       |             |           |             |                        |     |
|-----|------|-------|-------------|-----------|-------------|------------------------|-----|
| 218 | 2.47 | 10.69 | 71.42999768 | 71.429998 | 63.63999844 | TR24598 c0_g17_i1 CDS1 | 7   |
| 218 | 0    | 8.66  | 73.01999927 | 73.019999 | 63.48999739 | TR24598 c0_g1_i1 CDS1  | 6   |
| 218 | 0    | 8     | 72.72999883 | 72.729999 | 72.72999883 | TR24598 c0_g16_i1 CDS1 | 6   |
| 219 | 2.44 | 75.18 | 91.3500011  | 86.860001 | 86.86000109 | TR23240 c0_g1_i2 CDS2  | 132 |
| 220 | 2.41 | 17.7  | 71.64000273 | 71.640003 | 70.14999986 | TR19470 c2_g8_i1 CDS2  | 21  |
| 221 | 2.38 | 6.51  | 87.5        | 87.5      | 87.5        | TR24569 c0_g10_i2 CDS1 | 7   |
| 222 | 2.37 | 2.37  | 26.19999945 | 11.23     | 6.417000294 | TR8545 c0_g1_i1 CDS1   | 1   |
| 223 | 2.34 | 29.18 | 71.02000117 | 64.490002 | 62.44999766 | TR23063 c0_g1_i1 CDS1  | 31  |
| 224 | 2.28 | 11.93 | 54.25999761 | 41.49     | 41.49000049 | TR24693 c0_g26_i1 CDS1 | 8   |
| 225 | 2.27 | 14.96 | 61.76000237 | 49.020001 | 42.1600014  | TR24569 c0_g27_i1 CDS2 | 12  |
| 225 | 0    | 8.11  | 64.78999853 | 46.48     | 36.62       | TR24569 c0_g17_i1 CDS2 | 8   |
| 225 | 0    | 8.11  | 52.10999846 | 46.48     | 36.62       | TR24569 c0_g1_i1 CDS2  | 8   |
| 226 | 2.23 | 2.71  | 63.74999881 | 23.75     | 23.7499997  | TR10208 c0_g1_i1 CDS2  | 3   |
| 226 | 0    | 2.71  | 23.7499997  | 23.75     | 23.7499997  | TR10208 c0_g2_i1 CDS2  | 3   |
| 227 | 2.2  | 2.2   | 40.4399991  | 9.5590003 | 5.14700003  | TR12392 c0_g1_i1 CDS3  | 1   |
| 227 | 0    | 2     | 44.67999935 | 14.89     | 14.89000022 | TR16242 c0_g1_i1 CDS3  | 1   |
| 227 | 0    | 2     | 14.89000022 | 14.89     | 14.89000022 | TR18411 c0_g1_i2 CDS5  | 1   |
| 227 | 0    | 2     | 14.89000022 | 14.89     | 14.89000022 | TR18411 c0_g1_i1 CDS5  | 1   |
| 228 | 2.17 | 2.17  | 32.35000074 | 13.240001 | 13.24000061 | TR7755 c0_g1_i1 CDS2   | 2   |
| 229 | 2.15 | 8     | 91.43000245 | 67.619997 | 67.61999726 | TR16190 c0_g1_i1 CDS3  | 7   |
| 230 | 2.14 | 2.14  | 11.25999987 | 1.513     | 0.924399961 | TR22297 c0_g1_i1 CDS1  | 2   |
| 230 | 0    | 2.09  | 78.13000083 | 28.130001 | 17.19000041 | TR17429 c0_g1_i1 CDS2  | 2   |
| 230 | 0    | 2     | 26.55999959 | 17.19     | 17.19000041 | TR17429 c0_g3_i1 CDS2  | 2   |
| 230 | 0    | 2     | 29.82000113 | 19.3      | 19.30000037 | TR17429 c0_g2_i1 CDS2  | 2   |
| 231 | 2.12 | 28    | 71.78999782 | 71.789998 | 71.78999782 | TR17133 c1_g1_i1 CDS1  | 36  |
| 233 | 2.1  | 2.1   | 21.53999954 | 21.54     | 18.45999956 | TR20670 c1_g6_i4 CDS2  | 2   |
| 233 | 0    | 2.1   | 18.67000014 | 18.67     | 15.99999964 | TR20670 c1_g6_i3 CDS2  | 2   |
| 234 | 2.09 | 7.19  | 65.68999887 | 45.100001 | 33.32999945 | TR16766 c0_g2_i2 CDS1  | 6   |
| 234 | 0    | 12.16 | 72.28000164 | 31.52     | 25          | TR24598 c0_g10_i1 CDS1 | 7   |
| 234 | 0    | 7.19  | 65.68999887 | 45.100001 | 33.32999945 | TR16766 c0_g2_i1 CDS1  | 6   |
| 235 | 2.04 | 2.04  | 17.38999933 | 17.389999 | 17.38999933 | TR20670 c1_g5_i1 CDS3  | 6   |
| 235 | 0    | 2.04  | 22.22000062 | 22.220001 | 22.22000062 | TR20670 c1_g3_i1 CDS3  | 6   |
| 235 | 0    | 2.04  | 17.38999933 | 17.389999 | 17.38999933 | TR20670 c1_g2_i1 CDS3  | 6   |
| 235 | 0    | 2.04  | 17.38999933 | 17.389999 | 17.38999933 | TR20670 c0_g1_i1 CDS3  | 6   |
| 236 | 2.03 | 12.32 | 82.80000091 | 55.909997 | 44.08999979 | TR24398 c0_g2_i1 CDS1  | 6   |
| 236 | 0    | 12.31 | 70.96999884 | 63.440001 | 44.08999979 | TR24398 c0_g1_i1 CDS1  | 6   |
| 237 | 2.03 | 2.05  | 15.57999998 | 4.5230001 | 4.523000121 | TR20664 c0_g1_i3 CDS1  | 1   |
| 237 | 0    | 2.04  | 12.83999979 | 3.303     | 3.302999958 | TR20664 c0_g1_i1 CDS1  | 1   |
| 238 | 2.02 | 28.7  | 87.72000074 | 87.720001 | 75.44000149 | TR24861 c1_g19_i6 CDS1 | 34  |
| 239 | 2.02 | 10.23 | 76.46999955 | 72.549999 | 72.54999876 | TR24676 c1_g19_i1 CDS1 | 14  |
| 239 | 0    | 9.33  | 85.39000154 | 73.030001 | 73.03000093 | TR24676 c0_g1_i1 CDS1  | 13  |
| 240 | 2.02 | 10    | 57.34999776 | 57.349998 | 57.34999776 | TR24670 c2_g9_i1 CDS2  | 8   |
| 240 | 0    | 10    | 57.34999776 | 57.349998 | 57.34999776 | TR24670 c2_g3_i1 CDS2  | 8   |
| 241 | 2.02 | 2.02  | 14.21999931 | 10.55     | 10.54999977 | TR18570 c0_g2_i1 CDS1  | 1   |
| 242 | 2.01 | 37.72 | 72.89999723 | 67.290002 | 63.55000138 | TR23597 c1_g5_i1 CDS1  | 71  |

|     |      |       |             |           |             |                        |    |
|-----|------|-------|-------------|-----------|-------------|------------------------|----|
| 242 | 0    | 31.58 | 84.42000151 | 83.12     | 76.6200006  | TR23597 c1_g8_i4 CDS1  | 63 |
| 242 | 0    | 23.36 | 63.63999844 | 57.58     | 57.58000016 | TR23597 c1_g1_i1 CDS1  | 48 |
| 243 | 2.01 | 6.08  | 70.17999887 | 61.400002 | 61.40000224 | TR23419 c0_g11_i1 CDS1 | 16 |
| 244 | 2.01 | 2.01  | 41.67000055 | 9.3139999 | 3.430999815 | TR23551 c0_g1_i2 CDS2  | 1  |
| 244 | 0    | 2.01  | 35.55999994 | 7.9499997 | 2.928999998 | TR23551 c0_g1_i1 CDS1  | 1  |
| 245 | 2.01 | 2.01  | 24.07000065 | 8.642     | 8.64199996  | TR15561 c0_g1_i7 CDS1  | 1  |
| 245 | 0    | 2.01  | 24.07000065 | 8.642     | 8.64199996  | TR15561 c0_g1_i5 CDS1  | 1  |
| 245 | 0    | 2.01  | 24.07000065 | 8.642     | 8.64199996  | TR15561 c0_g1_i2 CDS1  | 1  |
| 245 | 0    | 2.01  | 24.07000065 | 8.642     | 8.64199996  | TR15561 c0_g1_i1 CDS1  | 1  |
| 245 | 0    | 2     | 22.13000059 | 11.48     | 11.47999987 | TR15561 c0_g1_i6 CDS3  | 1  |
| 245 | 0    | 2     | 22.13000059 | 11.48     | 11.47999987 | TR15561 c0_g1_i4 CDS3  | 1  |
| 245 | 0    | 2     | 22.13000059 | 11.48     | 11.47999987 | TR15561 c0_g1_i3 CDS3  | 1  |
| 246 | 2.01 | 2.01  | 13.54999989 | 3.7379999 | 3.737999871 | TR39793 c0_g1_i1 CDS1  | 1  |
| 247 | 2.01 | 2.01  | 12.78000027 | 6.1670002 | 6.16700016  | TR18812 c0_g1_i1 CDS4  | 1  |
| 248 | 2.01 | 2.01  | 15.94000012 | 15.94     | 15.94000012 | TR20670 c1_g6_i2 CDS3  | 3  |
| 248 | 0    | 2.01  | 15.94000012 | 15.94     | 15.94000012 | TR20670 c1_g6_i1 CDS3  | 3  |
| 249 | 2    | 39    | 84.83999968 | 71.01     | 65.16000032 | TR20070 c0_g1_i1 CDS4  | 25 |
| 249 | 0    | 39    | 84.83999968 | 71.01     | 65.16000032 | TR18310 c0_g1_i2 CDS4  | 25 |
| 249 | 0    | 39    | 84.83999968 | 71.01     | 65.16000032 | TR18310 c0_g1_i1 CDS4  | 25 |
| 250 | 2    | 35.75 | 80.43000102 | 63.910002 | 55.95999956 | TR24398 c1_g1_i1 CDS1  | 21 |
| 251 | 2    | 30.03 | 100         | 92.110002 | 92.11000204 | TR16426 c0_g1_i1 CDS2  | 66 |
| 252 | 2    | 27.19 | 71.60000205 | 67.460001 | 67.46000051 | TR5610 c0_g1_i1 CDS1   | 34 |
| 253 | 2    | 26.49 | 77.59000063 | 74.14     | 57.76000023 | TR23597 c1_g8_i3 CDS1  | 59 |
| 253 | 0    | 21.26 | 69.73999739 | 64.469999 | 64.46999907 | TR24670 c2_g14_i1 CDS4 | 55 |
| 253 | 0    | 17.14 | 62.69000173 | 56.720001 | 56.72000051 | TR24670 c2_g25_i1 CDS4 | 34 |
| 254 | 2    | 24.1  | 83.06000233 | 66.13     | 66.13000035 | TR18660 c0_g1_i1 CDS1  | 29 |
| 255 | 2    | 23.04 | 88.41000199 | 60.140002 | 60.14000177 | TR23970 c2_g2_i2 CDS1  | 20 |
| 255 | 0    | 8.79  | 78.7899971  | 51.520002 | 51.52000189 | TR10196 c0_g1_i1 CDS1  | 7  |
| 256 | 2    | 16.11 | 81.70999885 | 80.489999 | 80.48999906 | TR23756 c1_g1_i2 CDS1  | 12 |
| 257 | 2    | 14    | 89.60999846 | 89.609998 | 89.60999846 | TR19498 c0_g2_i1 CDS1  | 11 |
| 258 | 2    | 12.25 | 92.93000102 | 91.92     | 90.90999961 | TR24670 c2_g19_i1 CDS2 | 33 |
| 259 | 2    | 11.94 | 84.52000022 | 76.190001 | 67.86000133 | TR24569 c0_g23_i1 CDS1 | 10 |
| 260 | 2    | 10.03 | 88.51000071 | 68.970001 | 68.97000074 | TR24693 c0_g18_i1 CDS1 | 5  |
| 261 | 2    | 8     | 50          | 28.81     | 28.81000042 | TR23314 c2_g1_i1 CDS1  | 9  |
| 262 | 2    | 6     | 55.32000065 | 54.259998 | 54.25999761 | TR20502 c0_g3_i2 CDS1  | 3  |
| 262 | 0    | 6     | 57.77999759 | 56.669998 | 56.66999817 | TR20502 c0_g3_i1 CDS1  | 3  |
| 262 | 0    | 6     | 57.77999759 | 56.669998 | 56.66999817 | TR20502 c0_g1_i1 CDS1  | 3  |
| 263 | 2    | 4.8   | 56.33999705 | 56.339997 | 56.33999705 | TR18690 c0_g2_i1 CDS2  | 16 |
| 264 | 2    | 4     | 52.9399991  | 52.939999 | 52.9399991  | TR23419 c0_g5_i1 CDS2  | 9  |
| 264 | 0    | 4     | 63.16000223 | 63.160002 | 63.16000223 | TR23419 c0_g18_i1 CDS2 | 9  |
| 264 | 0    | 4     | 63.16000223 | 63.160002 | 63.16000223 | TR23419 c0_g12_i1 CDS2 | 9  |
| 264 | 0    | 4     | 63.16000223 | 63.160002 | 63.16000223 | TR23419 c0_g10_i1 CDS2 | 9  |
| 265 | 2    | 2.09  | 56.94000125 | 40.279999 | 31.94000125 | TR19532 c0_g2_i1 CDS2  | 1  |
| 265 | 0    | 2.09  | 58.32999945 | 40.279999 | 31.94000125 | TR19532 c0_g1_i1 CDS2  | 1  |
| 265 | 0    | 2.09  | 50          | 40.279999 | 31.94000125 | TR19532 c0_g3_i1 CDS2  | 1  |

|     |   |      |             |           |             |                       |   |
|-----|---|------|-------------|-----------|-------------|-----------------------|---|
| 266 | 2 | 2.03 | 10.00000015 | 2.857     | 2.857000008 | TR15608 c0_g1_i1 CDS3 | 1 |
| 266 | 0 | 2    | 12.98999935 | 4.5200001 | 4.520000145 | TR15608 c0_g1_i2 CDS1 | 1 |
| 266 | 0 | 2    | 34.92000103 | 12.7      | 12.70000041 | TR18489 c0_g1_i1 CDS4 | 1 |
| 267 | 2 | 2.02 | 12.09999993 | 5.7319999 | 5.731999874 | TR23186 c0_g4_i4 CDS1 | 1 |
| 267 | 0 | 2.02 | 10.61000004 | 6.8180002 | 6.818000227 | TR23186 c0_g6_i1 CDS1 | 1 |
| 267 | 0 | 2.02 | 10.61000004 | 6.8180002 | 6.818000227 | TR23186 c0_g5_i1 CDS1 | 1 |
| 267 | 0 | 2.02 | 8.917000145 | 5.7319999 | 5.731999874 | TR23186 c0_g4_i2 CDS1 | 1 |
| 267 | 0 | 2.02 | 10.61000004 | 6.8180002 | 6.818000227 | TR23186 c0_g2_i1 CDS1 | 1 |
| 267 | 0 | 2    | 21.87999934 | 14.06     | 14.05999959 | TR23186 c0_g1_i1 CDS1 | 1 |
| 268 | 2 | 2    | 29.19000089 | 1.863     | 1.862999983 | TR22055 c0_g1_i3 CDS1 | 1 |
| 268 | 0 | 2    | 26.06000006 | 1.664     | 1.664000005 | TR22055 c0_g1_i2 CDS1 | 1 |
| 268 | 0 | 2    | 37.16000021 | 2.244     | 2.243999951 | TR22055 c0_g1_i1 CDS1 | 1 |
| 268 | 0 | 2    | 22.20000029 | 1.6249999 | 1.62499994  | TR22055 c0_g1_i4 CDS1 | 1 |
| 269 | 2 | 2    | 16.75000042 | 4.569     | 4.569000006 | TR27975 c0_g1_i1 CDS2 | 1 |
| 270 | 2 | 2    | 32.85000026 | 11.68     | 7.299000025 | TR8258 c0_g2_i1 CDS1  | 1 |
| 270 | 0 | 2    | 32.85000026 | 11.68     | 7.299000025 | TR8258 c0_g1_i1 CDS1  | 1 |
| 270 | 0 | 2    | 36.59000099 | 13.01     | 8.129999787 | TR10812 c0_g1_i1 CDS1 | 1 |
| 271 | 2 | 2    | 17.12000072 | 4.5049999 | 4.504999891 | TR21637 c0_g3_i1 CDS4 | 1 |
| 272 | 2 | 2    | 8.433999866 | 2.7109999 | 2.710999921 | TR21606 c0_g1_i1 CDS1 | 1 |
| 273 | 2 | 2    | 11.05000004 | 2.9069999 | 2.906999923 | TR18366 c0_g1_i1 CDS1 | 1 |
| 275 | 2 | 2    | 23.81000072 | 19.840001 | 19.84000057 | TR30943 c0_g1_i1 CDS1 | 1 |
| 276 | 2 | 2    | 15.79000056 | 9.2110001 | 9.211000055 | TR19620 c0_g1_i1 CDS2 | 1 |
| 277 | 2 | 2    | 38.17999959 | 23.639999 | 23.63999933 | TR15571 c0_g2_i1 CDS3 | 2 |
| 277 | 0 | 2    | 38.17999959 | 23.639999 | 23.63999933 | TR15571 c0_g1_i1 CDS3 | 2 |
| 278 | 2 | 2    | 24.24000055 | 14.139999 | 14.13999945 | TR15225 c0_g1_i1 CDS1 | 1 |
| 280 | 2 | 2    | 13.33000064 | 13.330001 | 13.33000064 | TR9217 c0_g1_i1 CDS3  | 1 |
| 281 | 2 | 2    | 15.90999961 | 15.91     | 15.90999961 | TR918 c0_g1_i1 CDS11  | 1 |
| 282 | 2 | 2    | 9.782999754 | 9.7829998 | 9.782999754 | TR8170 c0_g2_i1 CDS2  | 1 |
| 282 | 0 | 2    | 9.782999754 | 9.7829998 | 9.782999754 | TR8170 c0_g1_i1 CDS3  | 1 |
| 283 | 2 | 2    | 15.99999964 | 16        | 15.99999964 | TR30993 c0_g1_i1 CDS1 | 1 |
| 284 | 2 | 2    | 13.86000067 | 13.860001 | 13.86000067 | TR23986 c0_g7_i2 CDS2 | 1 |
| 284 | 0 | 2    | 9.928999841 | 9.9289998 | 9.928999841 | TR23986 c0_g7_i1 CDS2 | 1 |
| 284 | 0 | 2    | 9.928999841 | 9.9289998 | 9.928999841 | TR23986 c0_g6_i1 CDS2 | 1 |
| 284 | 0 | 2    | 9.928999841 | 9.9289998 | 9.928999841 | TR23986 c0_g4_i1 CDS2 | 1 |
| 285 | 2 | 2    | 55.22000194 | 55.220002 | 55.22000194 | TR23063 c1_g1_i1 CDS1 | 1 |
| 286 | 2 | 2    | 11.54000014 | 11.54     | 11.54000014 | TR21689 c0_g1_i2 CDS6 | 1 |
| 286 | 0 | 2    | 11.54000014 | 11.54     | 11.54000014 | TR21689 c0_g1_i1 CDS6 | 1 |
| 287 | 2 | 2    | 12.96000034 | 12.96     | 12.96000034 | TR20398 c0_g1_i1 CDS3 | 1 |
| 288 | 2 | 2    | 2.212999947 | 2.2129999 | 2.212999947 | TR17890 c0_g1_i1 CDS1 | 1 |
| 289 | 2 | 2    | 10.96000001 | 10.96     | 10.96000001 | TR16368 c0_g1_i1 CDS4 | 1 |

| BEST N | BEST Unused | BEST Total | BEST %Cov   | BEST %Cov(50) | BEST %Cov(95) | Accession             | BEST Peptides(95%) |
|--------|-------------|------------|-------------|---------------|---------------|-----------------------|--------------------|
| 49     | 0           | 10.64      | 43.04000139 | 43.040001     | 41.76999927   | TR18770 c2_g7_i1 CDS1 | 12                 |
| 30     | 0           | 2          | 7.207000256 | 7.2070003     | 7.207000256   | TR11262 c0_g1_i1 CDS1 | 1                  |
| 30     | 0           | 2          | 7.207000256 | 7.2070003     | 7.207000256   | TR11262 c0_g2_i1 CDS1 | 1                  |

|    |       |       |             |           |             |                        |    |
|----|-------|-------|-------------|-----------|-------------|------------------------|----|
| 30 | 0     | 2     | 7.207000256 | 7.2070003 | 7.207000256 | TR11262 c0_g3_i1 CDS1  | 1  |
| 30 | 0     | 2     | 7.207000256 | 7.2070003 | 7.207000256 | TR11262 c0_g4_i1 CDS1  | 1  |
| 20 | 0     | 4     | 34.25000012 | 34.25     | 34.25000012 | TR11773 c0_g1_i1 CDS2  | 2  |
| 3  | 12.36 | 12.36 | 50          | 50        | 50          | TR15501 c0_g2_i1 CDS1  | 9  |
| 56 | 0     | 8.22  | 51.27999783 | 51.279998 | 51.27999783 | TR16575 c0_g1_i1 CDS3  | 7  |
| 18 | 0     | 3.42  | 22.85999954 | 21.9      | 21.89999968 | TR17377 c0_g1_i1 CDS2  | 2  |
| 18 | 0     | 3.42  | 21.24000043 | 20.35     | 20.35000026 | TR17377 c0_g4_i1 CDS2  | 2  |
| 61 | 0     | 1.36  | 11.11000031 | 11.11     | 11.11000031 | TR18290 c0_g1_i1 CDS1  | 1  |
| 61 | 1.36  | 1.36  | 11.11000031 | 11.11     | 11.11000031 | TR18290 c0_g1_i2 CDS1  | 1  |
| 25 | 2     | 10    | 50.49999952 | 44.549999 | 44.54999864 | TR18770 c0_g2_i1 CDS1  | 6  |
| 5  | 0     | 10    | 51.46999955 | 51.47     | 51.46999955 | TR18770 c2_g10_i1 CDS1 | 7  |
| 19 | 0     | 11.79 | 48.10000062 | 41.769999 | 41.76999927 | TR18770 c2_g7_i1 CDS1  | 11 |
| 56 | 1.74  | 8.22  | 52.63000131 | 52.630001 | 52.63000131 | TR18971 c0_g11_i1 CDS1 | 7  |
| 3  | 0     | 2     | 23.28999937 | 23.289999 | 23.28999937 | TR18971 c0_g14_i1 CDS3 | 1  |
| 3  | 0     | 2     | 22.37000018 | 22.37     | 22.37000018 | TR18971 c0_g2_i1 CDS1  | 1  |
| 3  | 0     | 2     | 22.37000018 | 22.37     | 22.37000018 | TR18971 c0_g4_i1 CDS1  | 1  |
| 18 | 0     | 14.25 | 75.44999719 | 75.449997 | 69.09000278 | TR19632 c0_g1_i1 CDS1  | 9  |
| 33 | 0     | 2.54  | 11.29999998 | 11.3      | 7.825999707 | TR20240 c0_g1_i2 CDS1  | 1  |
| 40 | 2     | 14    | 46.38999999 | 43.3      | 43.29999983 | TR20772 c0_g2_i2 CDS4  | 8  |
| 27 | 9.24  | 24.55 | 70.41000128 | 61.799997 | 61.79999709 | TR23063 c0_g1_i4 CDS1  | 20 |
| 29 | 0     | 6     | 15.25000036 | 15.25     | 15.25000036 | TR23314 c2_g5_i1 CDS1  | 6  |
| 29 | 0     | 6     | 15.25000036 | 15.25     | 15.25000036 | TR23314 c2_g7_i1 CDS1  | 6  |
| 55 | 2.06  | 2.06  | 11.03999987 | 3.681     | 3.68099995  | TR23314 c3_g2_i2 CDS1  | 1  |
| 35 | 0     | 8     | 54.17000055 | 54.170001 | 54.17000055 | TR23419 c0_g16_i1 CDS1 | 5  |
| 35 | 0     | 8     | 53.60999703 | 53.609997 | 53.60999703 | TR23419 c0_g16_i2 CDS1 | 5  |
| 31 | 0     | 2     | 33.32999945 | 33.329999 | 33.32999945 | TR23419 c0_g7_i1 CDS2  | 1  |
| 33 | 0     | 1.52  | 2.082999982 | 2.083     | 2.082999982 | TR23549 c0_g3_i2 CDS1  | 1  |
| 16 | 0     | 2     | 11.11000031 | 11.11     | 11.11000031 | TR23597 c1_g4_i2 CDS1  | 1  |
| 18 | 0     | 2     | 11.11000031 | 11.11     | 11.11000031 | TR23597 c1_g4_i2 CDS1  | 1  |
| 12 | 0     | 5.03  | 50          | 50        | 50          | TR23597 c1_g7_i1 CDS1  | 4  |
| 52 | 0     | 10.84 | 59.21000242 | 59.210002 | 59.21000242 | TR23597 c1_g9_i1 CDS1  | 10 |
| 42 | 0     | 4.01  | 10.33999994 | 6.0339998 | 6.033999845 | TR24015 c0_g1_i1 CDS2  | 2  |
| 30 | 0.04  | 7.6   | 25.15999973 | 21.24     | 16.67000055 | TR24015 c0_g1_i3 CDS2  | 4  |
| 42 | 0     | 4.01  | 10.17000005 | 5.9319999 | 5.931999907 | TR24015 c0_g1_i4 CDS2  | 2  |
| 22 | 4.9   | 4.93  | 23.69000018 | 16.869999 | 16.86999947 | TR24015 c0_g1_i7 CDS2  | 3  |
| 42 | 2     | 4.01  | 10.33999994 | 6.0339998 | 6.033999845 | TR24015 c0_g1_i8 CDS2  | 2  |
| 13 | 0     | 7.88  | 16.42999947 | 14.99     | 12.68000007 | TR24015 c0_g1_i9 CDS2  | 4  |
| 11 | 0     | 7.41  | 12.0099999  | 9.4690003 | 9.46900025  | TR24034 c3_g1_i1 CDS1  | 4  |
| 11 | 0     | 7.41  | 13.6500001  | 10.76     | 10.76000035 | TR24034 c3_g1_i2 CDS1  | 4  |
| 11 | 0     | 7.41  | 11.90000027 | 9.3819998 | 9.38199982  | TR24034 c3_g1_i3 CDS1  | 4  |
| 31 | 5.89  | 5.9   | 10.53000018 | 8.4799998 | 8.479999751 | TR24172 c0_g1_i1 CDS1  | 3  |
| 31 | 0     | 3.75  | 9.0640001   | 5.263     | 5.262999982 | TR24172 c0_g1_i2 CDS1  | 2  |
| 35 | 0     | 4.02  | 18.05000007 | 15.16     | 12.63999939 | TR24172 c0_g1_i3 CDS1  | 2  |
| 13 | 6     | 6     | 17.00000018 | 14.17     | 14.16999996 | TR24172 c0_g1_i5 CDS1  | 3  |
| 31 | 0     | 3.75  | 10.11999995 | 7.2870001 | 7.28700012  | TR24172 c0_g1_i6 CDS1  | 2  |

|    |       |       |             |           |             |                        |    |
|----|-------|-------|-------------|-----------|-------------|------------------------|----|
| 35 | 0     | 4.02  | 20.23999989 | 17        | 14.16999996 | TR24172 c0_g1_i7 CDS1  | 2  |
| 5  | 20.16 | 20.36 | 45.41000128 | 35.27     | 33.57000053 | TR24398 c1_g1_i3 CDS1  | 11 |
| 10 | 0     | 16.45 | 43.00000072 | 35.27     | 32.13       | TR24398 c1_g1_i4 CDS1  | 10 |
| 49 | 0     | 10.07 | 68.12000275 | 65.219998 | 53.61999869 | TR24569 c0_g16_i1 CDS2 | 8  |
| 49 | 0     | 9.87  | 43.68000031 | 43.68     | 42.53000021 | TR24569 c0_g27_i2 CDS2 | 8  |
| 33 | 0     | 12.2  | 52.93999991 | 49.020001 | 41.17999971 | TR24569 c0_g8_i1 CDS1  | 9  |
| 33 | 6.01  | 12.2  | 52.93999991 | 49.020001 | 41.17999971 | TR24569 c0_g8_i2 CDS1  | 9  |
| 53 | 0     | 10.34 | 51.34999752 | 51.349998 | 51.34999752 | TR24569 c0_g8_i3 CDS1  | 7  |
| 51 | 0     | 2.8   | 44.44000125 | 44.440001 | 31.74999952 | TR24598 c0_g22_i1 CDS1 | 2  |
| 16 | 0     | 2     | 12.70000041 | 12.7      | 12.70000041 | TR24670 c2_g10_i1 CDS2 | 1  |
| 16 | 0     | 2     | 13.10999999 | 13.11     | 13.10999999 | TR24670 c2_g15_i1 CDS1 | 1  |
| 16 | 0     | 2     | 11.11000031 | 11.11     | 11.11000031 | TR24670 c2_g17_i1 CDS1 | 1  |
| 16 | 0     | 2     | 11.11000031 | 11.11     | 11.11000031 | TR24670 c2_g2_i1 CDS4  | 1  |
| 16 | 0     | 2     | 13.78999949 | 13.789999 | 13.78999949 | TR24670 c2_g20_i1 CDS1 | 1  |
| 16 | 0     | 2     | 15.09000063 | 15.090001 | 15.09000063 | TR24670 c2_g21_i1 CDS1 | 1  |
| 16 | 0     | 2     | 12.70000041 | 12.7      | 12.70000041 | TR24670 c2_g23_i1 CDS2 | 1  |
| 12 | 0     | 5.03  | 45.32999992 | 45.33     | 45.32999992 | TR24670 c2_g24_i1 CDS4 | 4  |
| 50 | 4     | 11.74 | 54.43999767 | 54.439998 | 43.32999885 | TR24693 c0_g21_i1 CDS2 | 6  |

TABLE S3

Protein summary of Protein Pilot search of rpHPLC fraction 1 (Figure 2)

| N | Unused | Total | %Cov        | %Cov(50)  | %Cov(95)    | Accession             | Peptides(95%) |
|---|--------|-------|-------------|-----------|-------------|-----------------------|---------------|
| 1 | 18.64  | 18.64 | 67.14000106 | 50        | 50          | TR18979 c0_g1_i1 CDS1 | 22            |
| 2 | 6      | 16.25 | 67.14000106 | 50        | 50          | TR17861 c0_g1_i1 CDS3 | 11            |
| 3 | 6      | 6     | 26.73999965 | 26.74     | 26.73999965 | TR6481 c0_g2_i1 CDS1  | 3             |
| 3 | 0      | 6     | 33.82000029 | 33.82     | 33.82000029 | TR6481 c0_g1_i1 CDS1  | 3             |
| 3 | 0      | 6     | 29.49000001 | 29.49     | 29.49000001 | TR16482 c0_g1_i1 CDS1 | 3             |
| 4 | 2      | 12.24 | 58.56999755 | 50        | 50          | TR17861 c0_g1_i2 CDS2 | 9             |
| 5 | 2      | 2     | 7.156000286 | 3.303     | 3.302999958 | TR20664 c0_g1_i1 CDS1 | 1             |
| 5 | 0      | 2     | 7.286000252 | 4.5230001 | 4.523000121 | TR20664 c0_g1_i3 CDS1 | 1             |



TABLE S4
Protein summary of Protein Pilot search of rpHPLC fraction 2 (Figure 2)

| N  | Unused | Total | %Cov        | %Cov(50)  | %Cov(95)    | Accession             | Peptides(95%) |
|----|--------|-------|-------------|-----------|-------------|-----------------------|---------------|
| 1  | 0      | 24.01 | 68.48999858 | 67.119998 | 67.11999774 | TR14522 c1_g1_i1 CDS2 | 28            |
| 2  | 18.35  | 18.35 | 82.58000016 | 78.030002 | 72.72999883 | TR19632 c1_g1_i1 CDS1 | 10            |
| 3  | 12.12  | 12.12 | 62.13999987 | 39.809999 | 39.80999887 | TR21511 c0_g1_i6 CDS2 | 7             |
| 3  | 0      | 12.12 | 62.13999987 | 39.809999 | 39.80999887 | TR21511 c0_g1_i5 CDS1 | 7             |
| 3  | 0      | 12.12 | 62.13999987 | 39.809999 | 39.80999887 | TR21511 c0_g1_i4 CDS1 | 7             |
| 3  | 0      | 12.12 | 62.13999987 | 39.809999 | 39.80999887 | TR21511 c0_g1_i3 CDS1 | 7             |
| 3  | 0      | 12.12 | 62.13999987 | 39.809999 | 39.80999887 | TR21511 c0_g1_i2 CDS2 | 7             |
| 3  | 0      | 12.12 | 62.13999987 | 39.809999 | 39.80999887 | TR21511 c0_g1_i1 CDS1 | 7             |
| 3  | 0      | 12.12 | 62.13999987 | 39.809999 | 39.80999887 | TR11788 c0_g1_i1 CDS3 | 7             |
| 4  | 12.01  | 12.01 | 50          | 50        | 42.73000062 | TR10789 c0_g2_i1 CDS2 | 6             |
| 5  | 8.32   | 8.32  | 33.86000097 | 33.070001 | 27.55999863 | TR7977 c0_g2_i1 CDS2  | 5             |
| 5  | 0      | 8.32  | 34.67999995 | 33.87     | 28.22999954 | TR12929 c0_g1_i1 CDS2 | 5             |
| 5  | 0      | 6.27  | 47.76000082 | 46.270001 | 35.82000136 | TR7977 c0_g1_i1 CDS1  | 3             |
| 6  | 8      | 8     | 18.40000004 | 18.4      | 18.40000004 | TR17034 c0_g1_i1 CDS2 | 4             |
| 6  | 0      | 8     | 16.07999951 | 16.08     | 16.07999951 | TR12023 c0_g3_i1 CDS2 | 4             |
| 6  | 0      | 8     | 16.07999951 | 16.08     | 16.07999951 | TR12023 c0_g2_i1 CDS2 | 4             |
| 6  | 0      | 8     | 16.07999951 | 16.08     | 16.07999951 | TR12023 c0_g1_i1 CDS2 | 4             |
| 7  | 8      | 8     | 8.590000123 | 8.5900001 | 8.590000123 | TR33137 c0_g1_i1 CDS1 | 4             |
| 7  | 0      | 6     | 6.69599995  | 6.696     | 6.69599995  | TR22764 c1_g1_i1 CDS2 | 3             |
| 8  | 6.15   | 6.15  | 60.53000093 | 35.530001 | 27.63000131 | TR17276 c0_g2_i1 CDS1 | 3             |
| 9  | 6.01   | 6.01  | 46.57999873 | 36.989999 | 36.98999882 | TR11442 c0_g1_i1 CDS1 | 3             |
| 10 | 4.15   | 4.15  | 10.61000004 | 6.7100003 | 4.978       | TR19570 c0_g1_i1 CDS1 | 2             |
| 10 | 0      | 4.15  | 10.61000004 | 6.7100003 | 4.978       | TR18872 c0_g1_i1 CDS2 | 2             |
| 11 | 4.06   | 4.06  | 11.45000011 | 8.3970003 | 8.397000283 | TR6338 c0_g1_i1 CDS3  | 2             |
| 11 | 0      | 2.13  | 13.47000003 | 4.0819999 | 4.081999883 | TR11559 c0_g1_i5 CDS2 | 1             |
| 11 | 0      | 2.13  | 13.47000003 | 4.0819999 | 4.081999883 | TR11559 c0_g1_i3 CDS1 | 1             |
| 11 | 0      | 2.13  | 13.47000003 | 4.0819999 | 4.081999883 | TR11559 c0_g1_i2 CDS2 | 1             |
| 11 | 0      | 2.13  | 13.47000003 | 4.0819999 | 4.081999883 | TR11559 c0_g1_i1 CDS2 | 1             |
| 12 | 4      | 4     | 15.56999981 | 6.7979999 | 6.797999889 | TR23903 c0_g4_i2 CDS2 | 2             |
| 12 | 0      | 4     | 15.73999971 | 6.8740003 | 6.874000281 | TR23903 c0_g4_i1 CDS3 | 2             |
| 12 | 0      | 4     | 17.31999964 | 7.5609997 | 7.560999691 | TR14264 c0_g1_i1 CDS1 | 2             |
| 12 | 0      | 2     | 9.230999649 | 5.7689998 | 5.76899983  | TR23903 c0_g4_i3 CDS2 | 1             |
| 13 | 4      | 4     | 50          | 39.739999 | 39.73999918 | TR15501 c0_g2_i1 CDS1 | 2             |
| 13 | 0      | 4     | 50          | 39.739999 | 39.73999918 | TR14500 c0_g1_i1 CDS1 | 2             |
| 13 | 0      | 2     | 41.02999866 | 20.51     | 20.50999999 | TR15501 c0_g3_i1 CDS1 | 1             |
| 13 | 0      | 2     | 41.02999866 | 20.51     | 20.50999999 | TR15501 c0_g1_i1 CDS1 | 1             |
| 13 | 0      | 2     | 41.02999866 | 20.51     | 20.50999999 | TR14500 c0_g2_i1 CDS1 | 1             |
| 14 | 2.28   | 2.28  | 48.53000045 | 36.759999 | 23.53000045 | TR16094 c2_g1_i1 CDS1 | 3             |
| 15 | 2.2    | 2.2   | 33.09000134 | 9.5590003 | 5.14700003  | TR12392 c0_g1_i1 CDS3 | 1             |
| 15 | 0      | 2     | 14.89000022 | 14.89     | 14.89000022 | TR18411 c0_g1_i2 CDS5 | 1             |
| 15 | 0      | 2     | 14.89000022 | 14.89     | 14.89000022 | TR18411 c0_g1_i1 CDS5 | 1             |

|    |   |       |             |           |             |                        |    |
|----|---|-------|-------------|-----------|-------------|------------------------|----|
| 15 | 0 | 2     | 14.89000022 | 14.89     | 14.89000022 | TR16242 c0_g1_i1 CDS3  | 1  |
| 16 | 2 | 39.08 | 85.6400013  | 71.01     | 65.16000032 | TR20070 c0_g1_i1 CDS4  | 23 |
| 16 | 0 | 39.08 | 85.6400013  | 71.01     | 65.16000032 | TR18310 c0_g1_i2 CDS4  | 23 |
| 16 | 0 | 39.08 | 85.6400013  | 71.01     | 65.16000032 | TR18310 c0_g1_i1 CDS4  | 23 |
| 17 | 2 | 16.29 | 78.68999839 | 73.769999 | 68.02999973 | TR19632 c0_g2_i1 CDS1  | 10 |
| 17 | 0 | 14.25 | 75.44999719 | 75.449997 | 69.09000278 | TR19632 c0_g1_i1 CDS1  | 9  |
| 18 | 2 | 4.11  | 39.46999907 | 22.37     | 14.47000057 | TR17276 c0_g1_i1 CDS2  | 2  |
| 19 | 2 | 2     | 46.81000113 | 21.28     | 21.27999961 | TR7556 c0_g1_i1 CDS2   | 1  |
| 19 | 0 | 2     | 21.43000066 | 10.2      | 10.19999981 | TR7556 c0_g2_i1 CDS1   | 1  |
| 19 | 0 | 2     | 2.343999967 | 1.116     | 1.116000023 | TR15597 c0_g1_i1 CDS3  | 1  |
| 20 | 2 | 2     | 44.92999911 | 33.329999 | 33.32999945 | TR16094 c2_g3_i1 CDS1  | 1  |
| 21 | 2 | 2     | 34.77999866 | 23.190001 | 23.19000065 | TR16094 c2_g2_i1 CDS1  | 1  |
| 21 | 0 | 2     | 34.77999866 | 23.190001 | 23.19000065 | TR16094 c1_g2_i2 CDS2  | 1  |
| 21 | 0 | 2     | 34.77999866 | 23.190001 | 23.19000065 | TR16094 c1_g2_i1 CDS2  | 1  |
| 22 | 2 | 2     | 4.216999933 | 2.7109999 | 2.710999921 | TR21606 c0_g1_i1 CDS1  | 1  |
| 23 | 2 | 2     | 23.28999937 | 23.289999 | 23.28999937 | TR18971 c0_g8_i1 CDS2  | 1  |
| 23 | 0 | 2     | 23.28999937 | 23.289999 | 23.28999937 | TR18971 c0_g6_i1 CDS3  | 1  |
| 23 | 0 | 2     | 22.37000018 | 22.37     | 22.37000018 | TR18971 c0_g4_i1 CDS1  | 1  |
| 23 | 0 | 2     | 23.28999937 | 23.289999 | 23.28999937 | TR18971 c0_g3_i1 CDS2  | 1  |
| 23 | 0 | 2     | 22.37000018 | 22.37     | 22.37000018 | TR18971 c0_g2_i1 CDS1  | 1  |
| 23 | 0 | 2     | 22.37000018 | 22.37     | 22.37000018 | TR18971 c0_g15_i1 CDS1 | 1  |
| 23 | 0 | 2     | 23.28999937 | 23.289999 | 23.28999937 | TR18971 c0_g14_i1 CDS3 | 1  |
| 23 | 0 | 2     | 22.37000018 | 22.37     | 22.37000018 | TR18971 c0_g13_i1 CDS1 | 1  |
| 23 | 0 | 2     | 23.28999937 | 23.289999 | 23.28999937 | TR18971 c0_g12_i1 CDS3 | 1  |
| 23 | 0 | 2     | 22.37000018 | 22.37     | 22.37000018 | TR18971 c0_g11_i1 CDS1 | 1  |
| 23 | 0 | 2     | 21.78999931 | 21.789999 | 21.78999931 | TR16575 c0_g1_i1 CDS3  | 1  |

TABLE S5
Protein summary of Protein Pilot search of rpHPLC fraction 3 (Figure 2)

| N  | Unused | Total | %Cov        | %Cov(50)  | %Cov(95)    | Accession              | Peptides(95%) |
|----|--------|-------|-------------|-----------|-------------|------------------------|---------------|
| 1  | 95.16  | 95.16 | 83.19000006 | 83.19     | 83.19000006 | TR15540 c0_g1_i1 CDS3  | 126           |
| 2  | 60.56  | 60.56 | 83.56000185 | 83.560002 | 83.56000185 | TR19670 c0_g1_i1 CDS1  | 67            |
| 3  | 22     | 22    | 62.04000115 | 62.040001 | 61.1100018  | TR17133 c3_g1_i1 CDS1  | 15            |
| 4  | 14     | 14    | 63.09999824 | 63.099998 | 63.09999824 | TR18770 c2_g2_i1 CDS1  | 9             |
| 4  | 0      | 14    | 54.64000106 | 54.640001 | 54.64000106 | TR18770 c2_g11_i1 CDS1 | 9             |
| 5  | 10.95  | 12    | 41.58000052 | 41.580001 | 41.58000052 | TR18770 c0_g1_i1 CDS1  | 9             |
| 5  | 0      | 10    | 51.46999955 | 51.47     | 51.46999955 | TR18770 c2_g10_i1 CDS1 | 7             |
| 6  | 10.06  | 10.06 | 61.54000163 | 51.279998 | 38.46000135 | TR11265 c0_g1_i1 CDS1  | 5             |
| 7  | 10     | 29.67 | 84.2599988  | 84.259999 | 84.2599988  | TR19010 c0_g2_i1 CDS1  | 21            |
| 8  | 10     | 10    | 46.88000083 | 46.880001 | 46.88000083 | TR14597 c0_g1_i1 CDS3  | 7             |
| 9  | 6      | 15.55 | 80.33000231 | 80.330002 | 80.33000231 | TR30849 c0_g1_i1 CDS2  | 11            |
| 10 | 6      | 8     | 51.95000172 | 51.950002 | 51.95000172 | TR20957 c0_g1_i1 CDS2  | 4             |
| 10 | 0      | 8     | 51.95000172 | 51.950002 | 51.95000172 | TR19470 c2_g3_i1 CDS2  | 4             |
| 11 | 6      | 6     | 35.44999957 | 28.18     | 28.18000019 | TR10789 c0_g2_i1 CDS2  | 3             |
| 12 | 5.32   | 5.32  | 20.46999931 | 20.469999 | 20.46999931 | TR697 c0_g1_i1 CDS5    | 4             |
| 13 | 4      | 4     | 24.32000041 | 12.16     | 12.16000021 | TR23597 c1_g3_i3 CDS3  | 2             |
| 13 | 0      | 4     | 14.05999959 | 14.06     | 14.05999959 | TR23597 c1_g3_i8 CDS1  | 2             |
| 13 | 0      | 4     | 13.1400004  | 13.14     | 13.1400004  | TR23597 c1_g3_i6 CDS1  | 2             |
| 13 | 0      | 4     | 21.43000066 | 21.430001 | 21.43000066 | TR23597 c1_g3_i1 CDS1  | 2             |
| 14 | 4      | 4     | 42.86000133 | 38.960001 | 38.96000087 | TR13891 c0_g1_i1 CDS2  | 2             |
| 15 | 4      | 4     | 28.36999893 | 28.369999 | 28.36999893 | TR7596 c0_g2_i1 CDS2   | 2             |
| 15 | 0      | 4     | 28.36999893 | 28.369999 | 28.36999893 | TR7596 c0_g1_i1 CDS2   | 2             |
| 16 | 4      | 4     | 28.56999934 | 28.569999 | 28.56999934 | TR4154 c0_g2_i1 CDS2   | 2             |
| 16 | 0      | 4     | 28.56999934 | 28.569999 | 28.56999934 | TR4154 c0_g1_i1 CDS2   | 2             |
| 17 | 3.41   | 3.41  | 19.23000067 | 19.230001 | 19.23000067 | TR15501 c0_g3_i1 CDS1  | 2             |
| 17 | 0      | 3.41  | 19.23000067 | 19.230001 | 19.23000067 | TR15501 c0_g1_i1 CDS1  | 2             |
| 17 | 0      | 3.41  | 19.23000067 | 19.230001 | 19.23000067 | TR14500 c0_g2_i1 CDS1  | 2             |
| 17 | 0      | 2     | 10.26000008 | 10.26     | 10.26000008 | TR15501 c0_g2_i1 CDS1  | 1             |
| 17 | 0      | 2     | 10.26000008 | 10.26     | 10.26000008 | TR14500 c0_g1_i1 CDS1  | 1             |
| 18 | 2.32   | 2.32  | 18.17999929 | 18.179999 | 18.17999929 | TR21139 c0_g1_i1 CDS1  | 2             |
| 18 | 0      | 2     | 6.357999891 | 6.3579999 | 6.357999891 | TR21139 c1_g1_i1 CDS3  | 1             |
| 19 | 2      | 20.09 | 75          | 75        | 75          | TR19010 c0_g1_i1 CDS1  | 16            |
| 20 | 2      | 16    | 69.23000216 | 69.230002 | 67.94999838 | TR17133 c1_g1_i1 CDS1  | 12            |
| 21 | 2      | 4     | 39.73999918 | 23.08     | 23.08000028 | TR3944 c0_g1_i1 CDS2   | 2             |
| 21 | 0      | 4     | 46.97000086 | 27.270001 | 27.27000117 | TR10447 c0_g3_i1 CDS2  | 2             |
| 21 | 0      | 4     | 39.73999918 | 23.08     | 23.08000028 | TR10447 c0_g2_i1 CDS2  | 2             |
| 21 | 0      | 4     | 39.73999918 | 23.08     | 23.08000028 | TR10447 c0_g1_i1 CDS2  | 2             |
| 22 | 2      | 2     | 14.40999955 | 14.41     | 14.40999955 | TR991 c0_g1_i1 CDS1    | 1             |
| 23 | 2      | 2     | 18.45999956 | 18.46     | 18.45999956 | TR20670 c1_g6_i4 CDS2  | 1             |
| 23 | 0      | 2     | 15.99999964 | 16        | 15.99999964 | TR20670 c1_g6_i3 CDS2  | 1             |
| 24 | 2      | 2     | 15.24000019 | 15.24     | 15.24000019 | TR16190 c0_g1_i1 CDS3  | 1             |

TABLE S6
Protein summary of Protein Pilot search of rpHPLC fraction 4 (Figure 2)

| N  | Unused | Total | %Cov        | %Cov(50)  | %Cov(95)    | Accession              | Peptides(95%) |
|----|--------|-------|-------------|-----------|-------------|------------------------|---------------|
| 1  | 49.57  | 49.57 | 69.73999739 | 69.739997 | 69.73999739 | TR14746 c0_g1_i1 CDS1  | 57            |
| 2  | 35.44  | 35.44 | 49.63999987 | 47.029999 | 43.23000014 | TR24122 c1_g2_i3 CDS2  | 34            |
| 3  | 32.29  | 32.55 | 75          | 67.189997 | 64.06000257 | TR24122 c1_g2_i2 CDS2  | 33            |
| 4  | 29.75  | 29.75 | 57.66000152 | 57.660002 | 57.66000152 | TR22931 c0_g3_i1 CDS1  | 33            |
| 5  | 29.04  | 29.04 | 81.59999847 | 53.299999 | 53.29999924 | TR18613 c0_g1_i1 CDS1  | 18            |
| 6  | 20.07  | 20.07 | 69.99999881 | 69.999999 | 69.99999881 | TR20861 c1_g1_i1 CDS4  | 20            |
| 7  | 19.27  | 29.05 | 66.36999846 | 66.369998 | 66.36999846 | TR24122 c1_g2_i6 CDS3  | 26            |
| 7  | 0      | 29.05 | 66.36999846 | 66.369998 | 66.36999846 | TR24122 c1_g2_i1 CDS2  | 26            |
| 8  | 12.07  | 12.07 | 39.12999928 | 35.65     | 35.64999998 | TR18660 c1_g1_i1 CDS1  | 6             |
| 9  | 10.91  | 10.91 | 74.150002   | 59.179997 | 59.17999744 | TR20889 c1_g1_i1 CDS1  | 9             |
| 9  | 0      | 8.85  | 60.83999872 | 45.449999 | 45.44999897 | TR20889 c1_g1_i2 CDS1  | 8             |
| 10 | 10.04  | 10.04 | 49.32000041 | 35.139999 | 35.13999879 | TR23597 c1_g3_i3 CDS3  | 5             |
| 10 | 0      | 10    | 60.5799973  | 37.959999 | 37.95999885 | TR23597 c1_g3_i6 CDS1  | 5             |
| 10 | 0      | 10    | 40.63000083 | 40.630001 | 40.63000083 | TR23597 c1_g3_i8 CDS1  | 5             |
| 10 | 0      | 10    | 61.90000176 | 61.900002 | 61.90000176 | TR23597 c1_g3_i1 CDS1  | 5             |
| 11 | 7.98   | 7.98  | 40.200001   | 40.200001 | 33.32999945 | TR24569 c0_g27_i1 CDS2 | 4             |
| 11 | 0      | 5.54  | 28.74000072 | 28.740001 | 20.69000006 | TR24569 c0_g27_i2 CDS2 | 3             |
| 12 | 7.17   | 7.17  | 44.85999942 | 44.859999 | 44.85999942 | TR23597 c1_g8_i1 CDS1  | 5             |
| 12 | 0      | 9.19  | 56.87999725 | 56.879997 | 46.7900008  | TR24670 c2_g29_i1 CDS2 | 6             |
| 12 | 0      | 7.17  | 59.21000242 | 59.210002 | 59.21000242 | TR23597 c1_g9_i1 CDS1  | 5             |
| 12 | 0      | 7.17  | 49.45000112 | 49.450001 | 49.45000112 | TR23597 c1_g8_i2 CDS1  | 5             |
| 12 | 0      | 7.17  | 64.85999823 | 64.859998 | 64.85999823 | TR23597 c1_g6_i1 CDS1  | 5             |
| 12 | 0      | 7.17  | 44.85999942 | 44.859999 | 44.85999942 | TR23597 c1_g4_i1 CDS1  | 5             |
| 12 | 0      | 5.03  | 51.52000189 | 51.520002 | 51.52000189 | TR24670 c2_g30_i1 CDS4 | 4             |
| 12 | 0      | 5.03  | 45.32999992 | 45.33     | 45.32999992 | TR24670 c2_g24_i1 CDS4 | 4             |
| 12 | 0      | 5.03  | 50          | 50        | 50          | TR23597 c1_g7_i1 CDS1  | 4             |
| 12 | 0      | 5.03  | 28.0400008  | 28.040001 | 28.0400008  | TR23597 c1_g5_i1 CDS1  | 4             |
| 13 | 6.03   | 6.03  | 51.34999752 | 39.64     | 39.64000046 | TR991 c0_g1_i1 CDS1    | 9             |
| 14 | 6      | 32.55 | 71.88000083 | 64.060003 | 60.93999743 | TR24122 c1_g2_i5 CDS1  | 28            |
| 15 | 4.16   | 4.16  | 28.8500011  | 24.04     | 24.04000014 | TR18837 c0_g5_i1 CDS2  | 3             |
| 15 | 0      | 4.16  | 48.39000106 | 40.32     | 40.32000005 | TR18837 c0_g3_i1 CDS2  | 3             |
| 16 | 4      | 4     | 32.64999986 | 24.49     | 24.49000031 | TR10278 c0_g1_i1 CDS1  | 2             |
| 16 | 0      | 4     | 25.70999861 | 25.709999 | 25.70999861 | TR24676 c1_g1_i3 CDS1  | 2             |
| 16 | 0      | 4     | 24.49000031 | 24.49     | 24.49000031 | TR10278 c0_g3_i1 CDS1  | 2             |
| 16 | 0      | 2     | 12.42000014 | 9.1499999 | 9.149999917 | TR24676 c1_g4_i1 CDS1  | 1             |
| 16 | 0      | 2     | 25.74000061 | 13.860001 | 13.86000067 | TR24676 c1_g1_i2 CDS2  | 1             |
| 16 | 0      | 2     | 25.70999861 | 25.709999 | 13.33000064 | TR24676 c1_g12_i1 CDS1 | 1             |
| 16 | 0      | 2     | 36.07000113 | 36.070001 | 36.07000113 | TR24676 c1_g9_i1 CDS3  | 1             |
| 16 | 0      | 2     | 12.72999942 | 12.729999 | 12.72999942 | TR24676 c1_g1_i4 CDS1  | 1             |
| 16 | 0      | 2     | 13.33000064 | 13.330001 | 13.33000064 | TR24676 c1_g16_i1 CDS1 | 1             |
| 16 | 0      | 2     | 36.07000113 | 36.070001 | 36.07000113 | TR24676 c1_g14_i1 CDS1 | 1             |

|    |      |      |             |           |             |                        |   |
|----|------|------|-------------|-----------|-------------|------------------------|---|
| 16 | 0    | 2    | 23.65999967 | 23.66     | 23.65999967 | TR10278 c0_g2_i1 CDS1  | 1 |
| 17 | 3.5  | 3.5  | 18.0399999  | 10.59     | 10.58999971 | TR17674 c0_g1_i1 CDS2  | 2 |
| 17 | 0    | 1.32 | 32.53000081 | 9.6390001 | 9.639000148 | TR28572 c0_g1_i1 CDS1  | 1 |
| 18 | 3.42 | 3.42 | 28.15000117 | 17.039999 | 17.03999937 | TR19075 c0_g1_i2 CDS2  | 2 |
| 18 | 0    | 3.42 | 21.24000043 | 20.35     | 20.35000026 | TR17377 c0_g4_i1 CDS2  | 2 |
| 18 | 0    | 3.42 | 22.85999954 | 21.9      | 21.89999968 | TR17377 c0_g3_i1 CDS2  | 2 |
| 18 | 0    | 3.42 | 22.85999954 | 21.9      | 21.89999968 | TR17377 c0_g1_i1 CDS2  | 2 |
| 18 | 0    | 2.01 | 53.57000232 | 26.789999 | 26.78999901 | TR17377 c0_g7_i1 CDS1  | 1 |
| 19 | 3.16 | 3.16 | 35.58999896 | 24.58     | 15.25000036 | TR17681 c0_g2_i1 CDS2  | 2 |
| 19 | 0    | 3.16 | 35.58999896 | 24.58     | 15.25000036 | TR17681 c0_g1_i1 CDS2  | 2 |
| 19 | 0    | 3.16 | 24.58000034 | 24.58     | 15.25000036 | TR17681 c0_g3_i1 CDS2  | 2 |
| 20 | 2.01 | 2.5  | 20.76999992 | 7.7289999 | 3.62300016  | TR24398 c1_g1_i7 CDS1  | 1 |
| 20 | 0    | 2.49 | 15.28999954 | 9.7860001 | 4.586999863 | TR24398 c1_g1_i1 CDS1  | 1 |
| 20 | 0    | 2.06 | 16.91000015 | 5.0719999 | 3.62300016  | TR24398 c1_g1_i4 CDS1  | 1 |
| 20 | 0    | 2.06 | 12.74999976 | 6.8630002 | 4.90199998  | TR24398 c1_g1_i6 CDS1  | 1 |
| 21 | 2.01 | 2.01 | 9.578999877 | 3.7379999 | 3.737999871 | TR20169 c0_g1_i1 CDS1  | 1 |
| 21 | 0    | 2    | 30.86000085 | 19.750001 | 19.75000054 | TR6278 c0_g1_i1 CDS2   | 1 |
| 22 | 2.01 | 2.01 | 16.83000028 | 9.9009998 | 9.900999814 | TR18770 c0_g1_i1 CDS1  | 1 |
| 22 | 0    | 2    | 11.90000027 | 11.9      | 11.90000027 | TR18770 c2_g9_i1 CDS1  | 1 |
| 22 | 0    | 2    | 12.65999973 | 12.66     | 12.65999973 | TR18770 c2_g7_i1 CDS1  | 1 |
| 22 | 0    | 2    | 14.71000016 | 14.71     | 14.71000016 | TR18770 c2_g10_i1 CDS1 | 1 |
| 23 | 2    | 6.05 | 40.32000005 | 33.87     | 33.86999965 | TR18660 c0_g1_i1 CDS1  | 3 |
| 24 | 2    | 4.7  | 27.88999975 | 27.89     | 27.88999975 | TR20889 c1_g2_i2 CDS2  | 4 |
| 24 | 0    | 4.7  | 27.88999975 | 27.89     | 27.88999975 | TR20889 c1_g2_i1 CDS1  | 4 |
| 25 | 2    | 4.16 | 28.8500011  | 20.190001 | 20.19000053 | TR18837 c0_g4_i1 CDS2  | 3 |
| 26 | 2    | 4.01 | 28.8500011  | 24.04     | 24.04000014 | TR18837 c0_g2_i1 CDS2  | 2 |
| 26 | 0    | 4.01 | 41.10000134 | 34.25     | 34.25000012 | TR11773 c0_g1_i1 CDS2  | 2 |
| 26 | 0    | 2.01 | 19.23000067 | 10.58     | 10.58000028 | TR18837 c0_g6_i1 CDS2  | 1 |
| 27 | 2    | 4    | 38.02999854 | 25.350001 | 25.35000145 | TR24670 c2_g1_i1 CDS2  | 2 |
| 28 | 2    | 4    | 22.85999954 | 22.86     | 22.85999954 | TR24676 c1_g1_i1 CDS2  | 2 |
| 28 | 0    | 2    | 13.33000064 | 13.330001 | 13.33000064 | TR24676 c1_g18_i1 CDS2 | 1 |
| 29 | 2    | 2    | 20.58999985 | 15.69     | 15.69000036 | TR24676 c1_g19_i1 CDS1 | 1 |
| 29 | 0    | 2    | 17.98000038 | 17.98     | 17.98000038 | TR24676 c0_g1_i1 CDS1  | 1 |
| 30 | 2    | 2    | 8.474999666 | 8.4749997 | 8.474999666 | TR5441 c0_g2_i1 CDS1   | 1 |
| 30 | 0    | 2    | 9.615000337 | 9.6150003 | 9.615000337 | TR19970 c0_g9_i1 CDS1  | 1 |
| 30 | 0    | 2    | 17.54000038 | 17.54     | 17.54000038 | TR19970 c0_g8_i1 CDS1  | 1 |
| 30 | 0    | 2    | 17.54000038 | 17.54     | 17.54000038 | TR19970 c0_g7_i1 CDS1  | 1 |
| 30 | 0    | 2    | 8.92900005  | 8.9290001 | 8.92900005  | TR19970 c0_g5_i1 CDS1  | 1 |
| 30 | 0    | 2    | 17.54000038 | 17.54     | 17.54000038 | TR19970 c0_g4_i1 CDS1  | 1 |
| 30 | 0    | 2    | 17.54000038 | 17.54     | 17.54000038 | TR19970 c0_g3_i1 CDS1  | 1 |
| 30 | 0    | 2    | 9.615000337 | 9.6150003 | 9.615000337 | TR19970 c0_g1_i2 CDS1  | 1 |
| 31 | 2    | 2    | 5.792000145 | 5.7920001 | 5.792000145 | TR23770 c4_g1_i1 CDS2  | 1 |
| 31 | 0    | 2    | 6.09799996  | 6.098     | 6.09799996  | TR23770 c3_g1_i1 CDS1  | 1 |
| 32 | 2    | 2    | 1.62499994  | 1.6249999 | 1.62499994  | TR22055 c0_g1_i4 CDS1  | 1 |
| 32 | 0    | 2    | 1.862999983 | 1.863     | 1.862999983 | TR22055 c0_g1_i3 CDS1  | 1 |

|    |   |   |             |           |             |                        |   |
|----|---|---|-------------|-----------|-------------|------------------------|---|
| 32 | 0 | 2 | 1.664000005 | 1.664     | 1.664000005 | TR22055 c0_g1_i2 CDS1  | 1 |
| 32 | 0 | 2 | 2.243999951 | 2.244     | 2.243999951 | TR22055 c0_g1_i1 CDS1  | 1 |
| 33 | 2 | 2 | 23.28999937 | 23.289999 | 23.28999937 | TR18971 c0_g8_i1 CDS2  | 1 |
| 33 | 0 | 2 | 23.28999937 | 23.289999 | 23.28999937 | TR18971 c0_g6_i1 CDS3  | 1 |
| 33 | 0 | 2 | 22.37000018 | 22.37     | 22.37000018 | TR18971 c0_g4_i1 CDS1  | 1 |
| 33 | 0 | 2 | 23.28999937 | 23.289999 | 23.28999937 | TR18971 c0_g3_i1 CDS2  | 1 |
| 33 | 0 | 2 | 22.37000018 | 22.37     | 22.37000018 | TR18971 c0_g2_i1 CDS1  | 1 |
| 33 | 0 | 2 | 22.37000018 | 22.37     | 22.37000018 | TR18971 c0_g15_i1 CDS1 | 1 |
| 33 | 0 | 2 | 23.28999937 | 23.289999 | 23.28999937 | TR18971 c0_g14_i1 CDS3 | 1 |
| 33 | 0 | 2 | 22.37000018 | 22.37     | 22.37000018 | TR18971 c0_g13_i1 CDS1 | 1 |
| 33 | 0 | 2 | 23.28999937 | 23.289999 | 23.28999937 | TR18971 c0_g12_i1 CDS3 | 1 |
| 33 | 0 | 2 | 22.37000018 | 22.37     | 22.37000018 | TR18971 c0_g11_i1 CDS1 | 1 |
| 33 | 0 | 2 | 21.78999931 | 21.789999 | 21.78999931 | TR16575 c0_g1_i1 CDS3  | 1 |
| 34 | 2 | 2 | 15.79000056 | 15.790001 | 15.79000056 | TR16426 c0_g2_i1 CDS2  | 1 |
| 34 | 0 | 2 | 15.79000056 | 15.790001 | 15.79000056 | TR16426 c0_g1_i1 CDS2  | 1 |

**TABLE S7**  
 Protein summary of Protein Pilot search of rpHPLC fraction 5 (Figure 2)

| N  | Unused | Total | %Cov        | %Cov(50)  | %Cov(95)    | Accession              | Peptides(95%) |
|----|--------|-------|-------------|-----------|-------------|------------------------|---------------|
| 1  | 50.25  | 50.25 | 69.91000175 | 62.5      | 59.2599988  | TR15609 c0_g1_i1 CDS1  | 31            |
| 2  | 49.7   | 49.7  | 79.14999723 | 71.429998 | 71.42999768 | TR23770 c4_g1_i1 CDS2  | 56            |
| 2  | 0      | 49.7  | 83.32999945 | 75.199997 | 75.19999743 | TR23770 c3_g1_i1 CDS1  | 56            |
| 3  | 48.78  | 48.78 | 62.15000153 | 60.509998 | 57.01000094 | TR20169 c0_g1_i1 CDS1  | 53            |
| 4  | 47.21  | 47.21 | 75.44000149 | 71.890002 | 70.10999918 | TR23770 c4_g2_i1 CDS2  | 41            |
| 5  | 46.4   | 48.21 | 69.98000145 | 58.600003 | 52.06000209 | TR22258 c0_g1_i1 CDS1  | 34            |
| 6  | 33.21  | 33.21 | 83.63999724 | 83.179998 | 80.90999722 | TR18707 c0_g1_i1 CDS1  | 27            |
| 7  | 31.33  | 31.33 | 76.34999752 | 76.349998 | 74.32000041 | TR23597 c1_g3_i3 CDS3  | 50            |
| 8  | 25.34  | 25.34 | 47.54000008 | 47.54     | 44.58999932 | TR24122 c1_g2_i4 CDS2  | 19            |
| 9  | 22.47  | 22.47 | 66.36000276 | 62.620002 | 62.62000203 | TR23597 c1_g8_i1 CDS1  | 37            |
| 9  | 0      | 22.47 | 66.36000276 | 62.620002 | 62.62000203 | TR23597 c1_g4_i1 CDS1  | 37            |
| 9  | 0      | 22.47 | 90.53999782 | 90.539998 | 90.53999782 | TR23597 c1_g6_i1 CDS1  | 37            |
| 10 | 20.73  | 20.73 | 51.12000108 | 49.380001 | 44.67000067 | TR23756 c1_g1_i1 CDS2  | 14            |
| 11 | 17.87  | 17.87 | 31.06000125 | 22.040001 | 20.4400003  | TR18551 c0_g1_i1 CDS2  | 11            |
| 12 | 16.93  | 16.93 | 79.40999866 | 73.53     | 72.54999876 | TR20046 c0_g1_i3 CDS1  | 16            |
| 13 | 16.46  | 18.57 | 85.32000184 | 85.320002 | 85.32000184 | TR24670 c2_g4_i1 CDS1  | 26            |
| 14 | 16.26  | 16.26 | 70.0699985  | 59.859997 | 58.49999785 | TR10278 c0_g3_i1 CDS1  | 10            |
| 14 | 0      | 14.78 | 70.0699985  | 51.700002 | 50.34000278 | TR10278 c0_g1_i1 CDS1  | 9             |
| 15 | 14.36  | 14.36 | 51.02999806 | 50        | 46.38999999 | TR21070 c0_g4_i1 CDS2  | 11            |
| 15 | 0      | 14.36 | 51.02999806 | 50        | 46.38999999 | TR20772 c0_g2_i1 CDS1  | 11            |
| 16 | 12.8   | 12.8  | 21.78999931 | 21.789999 | 21.78999931 | TR23240 c0_g1_i2 CDS2  | 20            |
| 17 | 12.47  | 12.47 | 51.37000084 | 40.439999 | 37.70000041 | TR16224 c0_g1_i1 CDS1  | 9             |
| 18 | 9.89   | 9.89  | 43.23999882 | 43.239999 | 43.23999882 | TR17389 c0_g1_i1 CDS1  | 5             |
| 19 | 8.42   | 8.51  | 31.88000023 | 20.53     | 16.42999947 | TR24398 c1_g1_i8 CDS2  | 5             |
| 19 | 0      | 8.51  | 30.68000078 | 20.53     | 16.42999947 | TR24398 c1_g1_i4 CDS1  | 5             |
| 19 | 0      | 6.12  | 25.11999905 | 14.98     | 10.86999997 | TR24398 c1_g1_i5 CDS1  | 4             |
| 20 | 8      | 8     | 33.57999921 | 33.579999 | 33.57999921 | TR24676 c1_g15_i2 CDS1 | 4             |
| 21 | 7.82   | 7.82  | 42.73000062 | 42.730001 | 42.73000062 | TR10789 c0_g2_i1 CDS2  | 4             |
| 22 | 6.93   | 9.67  | 44.49999928 | 39.910001 | 32.57000148 | TR18693 c0_g1_i1 CDS1  | 6             |
| 23 | 6.91   | 12.51 | 84.50999856 | 84.509999 | 84.50999856 | TR24670 c2_g1_i1 CDS2  | 34            |
| 24 | 6.5    | 20.17 | 70.30000091 | 66.339999 | 66.33999944 | TR24670 c2_g11_i1 CDS4 | 32            |
| 25 | 6.05   | 8.06  | 68.84999871 | 68.849999 | 68.84999871 | TR24670 c2_g27_i1 CDS1 | 12            |
| 25 | 0      | 6.05  | 78.68999839 | 31.150001 | 31.15000129 | TR24670 c2_g26_i1 CDS2 | 8             |
| 26 | 6      | 11.06 | 87.99999952 | 73.329997 | 73.32999706 | TR24861 c1_g23_i1 CDS3 | 14            |
| 26 | 0      | 8.98  | 67.69000292 | 67.690003 | 67.69000292 | TR24861 c1_g26_i1 CDS3 | 11            |
| 27 | 6      | 6     | 30.30000031 | 30.3      | 30.30000031 | TR13276 c0_g1_i2 CDS2  | 3             |
| 27 | 0      | 3.82  | 8.296000212 | 4.1480001 | 4.148000106 | TR22904 c0_g1_i1 CDS3  | 2             |
| 27 | 0      | 3.82  | 18.79999936 | 18.799999 | 18.79999936 | TR13276 c0_g1_i1 CDS3  | 2             |
| 28 | 5.26   | 5.26  | 18.01999956 | 12.79     | 12.79000044 | TR20170 c1_g1_i1 CDS1  | 3             |
| 28 | 0      | 4     | 46.23999894 | 33.329999 | 33.32999945 | TR16730 c0_g1_i1 CDS4  | 2             |
| 29 | 5.19   | 5.19  | 18.75       | 18.75     | 18.75       | TR24403 c1_g2_i2 CDS1  | 3             |

|    |      |       |             |           |             |                        |    |
|----|------|-------|-------------|-----------|-------------|------------------------|----|
| 29 | 0    | 3.14  | 38.98000121 | 38.980001 | 38.98000121 | TR24403 c1_g3_i1 CDS1  | 2  |
| 30 | 4.17 | 13.2  | 23.7499997  | 19.71     | 17.57999957 | TR24122 c1_g2_i3 CDS2  | 8  |
| 31 | 4.04 | 28.99 | 90.82999825 | 87.159997 | 87.15999722 | TR24670 c2_g29_i1 CDS2 | 48 |
| 32 | 4.03 | 4.06  | 15.64999968 | 6.8460003 | 4.645000026 | TR22816 c0_g1_i1 CDS1  | 2  |
| 33 | 4    | 25.57 | 71.2199986  | 71.219999 | 67.62999892 | TR23770 c4_g2_i2 CDS1  | 30 |
| 33 | 0    | 9.84  | 45.78000009 | 45.78     | 39.75999951 | TR23770 c2_g1_i1 CDS4  | 9  |
| 34 | 4    | 22.47 | 66.36000276 | 62.620002 | 62.62000203 | TR23597 c1_g5_i1 CDS1  | 35 |
| 34 | 0    | 17.07 | 81.81999922 | 81.819999 | 75.31999946 | TR23597 c1_g8_i4 CDS1  | 30 |
| 34 | 0    | 16.95 | 63.63999844 | 57.58     | 57.58000016 | TR23597 c1_g1_i1 CDS1  | 25 |
| 35 | 3.96 | 4     | 25.56999922 | 25.569999 | 18.32000017 | TR30852 c0_g1_i1 CDS1  | 2  |
| 36 | 3.49 | 3.49  | 14.47000057 | 11.84     | 11.84       | TR14746 c0_g1_i1 CDS1  | 2  |
| 36 | 0    | 3.49  | 23.08000028 | 18.880001 | 18.88000071 | TR12357 c0_g1_i1 CDS1  | 2  |
| 36 | 0    | 3.47  | 19.2900002  | 19.29     | 19.2900002  | TR12357 c0_g2_i1 CDS1  | 2  |
| 37 | 3.35 | 7.9   | 61.43000126 | 24.29     | 22.85999954 | TR24676 c1_g1_i1 CDS2  | 4  |
| 37 | 0    | 3.35  | 61.33000255 | 13.330001 | 13.33000064 | TR24676 c1_g18_i1 CDS2 | 2  |
| 38 | 3.28 | 10.59 | 44.44000125 | 33.989999 | 33.9899987  | TR24676 c1_g4_i1 CDS1  | 7  |
| 38 | 0    | 8.55  | 38.10000122 | 38.100001 | 38.10000122 | TR24676 c1_g16_i1 CDS1 | 6  |
| 38 | 0    | 8.55  | 38.10000122 | 38.100001 | 38.10000122 | TR24676 c1_g12_i1 CDS1 | 6  |
| 38 | 0    | 6.29  | 41.58000052 | 25.740001 | 25.74000061 | TR24676 c1_g2_i1 CDS1  | 4  |
| 38 | 0    | 3.28  | 30.00000119 | 30.000001 | 30.00000119 | TR24676 c1_g8_i1 CDS2  | 2  |
| 38 | 0    | 3.28  | 30.00000119 | 30.000001 | 30.00000119 | TR24676 c1_g17_i1 CDS2 | 2  |
| 39 | 2.91 | 5.41  | 17.52000004 | 11.92     | 9.976000339 | TR23970 c2_g1_i1 CDS1  | 4  |
| 39 | 0    | 2     | 10.70000008 | 8.021     | 8.021000028 | TR23970 c2_g2_i1 CDS2  | 1  |
| 40 | 2.44 | 10.76 | 60.00000238 | 56.43     | 47.13999927 | TR24676 c1_g1_i3 CDS1  | 7  |
| 41 | 2.32 | 2.32  | 23.96000028 | 17.19     | 7.812999934 | TR24122 c1_g2_i2 CDS2  | 1  |
| 42 | 2.16 | 7.62  | 28.99000049 | 19.320001 | 15.45999944 | TR24398 c1_g1_i3 CDS1  | 4  |
| 42 | 0    | 5.16  | 28.09999883 | 16.670001 | 13.40000033 | TR24398 c1_g1_i6 CDS1  | 3  |
| 42 | 0    | 3.01  | 20.76999992 | 11.11     | 7.24600032  | TR24398 c1_g1_i2 CDS1  | 2  |
| 43 | 2.03 | 6.05  | 40.40000141 | 25.830001 | 25.83000064 | TR24676 c1_g20_i2 CDS1 | 4  |
| 43 | 0    | 4     | 31.11000061 | 31.110001 | 31.11000061 | TR24676 c1_g7_i1 CDS1  | 3  |
| 44 | 2    | 14    | 80.9499979  | 80.949998 | 80.9499979  | TR18707 c1_g1_i1 CDS1  | 12 |
| 45 | 2    | 10.47 | 92.93000102 | 90.91     | 90.90999961 | TR24670 c2_g19_i1 CDS2 | 18 |
| 46 | 2    | 6.05  | 70.59000134 | 27.939999 | 27.9399991  | TR24670 c2_g28_i1 CDS2 | 8  |
| 46 | 0    | 6.05  | 78.68999839 | 31.150001 | 31.15000129 | TR24670 c2_g26_i1 CDS2 | 8  |
| 46 | 0    | 2.98  | 30.88000119 | 27.939999 | 27.9399991  | TR24670 c2_g9_i1 CDS2  | 5  |
| 46 | 0    | 2.98  | 30.88000119 | 27.939999 | 27.9399991  | TR24670 c2_g3_i1 CDS2  | 5  |
| 47 | 2    | 4     | 43.1400001  | 27.450001 | 27.45000124 | TR24676 c1_g19_i1 CDS1 | 2  |
| 47 | 0    | 4     | 31.45999908 | 31.459999 | 31.45999908 | TR24676 c0_g1_i1 CDS1  | 2  |
| 48 | 2    | 2.03  | 26.55999959 | 17.19     | 17.19000041 | TR24676 c1_g10_i1 CDS1 | 1  |



TABLE S8
Protein summary of Protein Pilot search of rpHPLC fraction 6 (Figure 2)

| N  | Unused | Total | %Cov        | %Cov(50)  | %Cov(95)    | Accession              | Peptides(95%) |
|----|--------|-------|-------------|-----------|-------------|------------------------|---------------|
| 1  | 55.29  | 55.29 | 71.78000212 | 67.640001 | 67.64000058 | TR23970 c2_g1_i1 CDS1  | 43            |
| 2  | 47.1   | 47.1  | 71.06000185 | 59.030002 | 57.41000175 | TR15609 c0_g1_i1 CDS1  | 32            |
| 3  | 44.17  | 44.17 | 68.9800024  | 67.739999 | 64.27000165 | TR23756 c1_g1_i1 CDS2  | 29            |
| 4  | 38.07  | 38.07 | 60.76999903 | 56.900001 | 43.83000135 | TR23612 c0_g1_i2 CDS1  | 30            |
| 5  | 37.84  | 37.84 | 85.90999842 | 83.639997 | 80.90999722 | TR18707 c0_g1_i1 CDS1  | 29            |
| 6  | 37.13  | 37.13 | 66.40999913 | 66.409999 | 66.40999913 | TR23770 c4_g1_i1 CDS2  | 24            |
| 6  | 0      | 37.13 | 69.91999745 | 69.919997 | 69.91999745 | TR23770 c3_g1_i1 CDS1  | 24            |
| 7  | 35.03  | 35.03 | 96.61999941 | 96.619999 | 96.61999941 | TR23597 c1_g3_i3 CDS3  | 53            |
| 8  | 31.03  | 37.79 | 87.15999722 | 82.11     | 71.56000137 | TR18693 c0_g1_i1 CDS1  | 29            |
| 9  | 30.47  | 30.47 | 67.29000211 | 66.360003 | 60.75000167 | TR23597 c1_g8_i1 CDS1  | 50            |
| 9  | 0      | 30.47 | 67.29000211 | 66.360003 | 60.75000167 | TR23597 c1_g4_i1 CDS1  | 50            |
| 9  | 0      | 30.47 | 90.53999782 | 90.539998 | 87.84000278 | TR23597 c1_g6_i1 CDS1  | 50            |
| 10 | 29.94  | 29.94 | 60.00000238 | 60.000002 | 57.35999942 | TR20969 c0_g1_i1 CDS1  | 25            |
| 11 | 28.66  | 28.66 | 71.36999965 | 69.800001 | 64.70999718 | TR17674 c0_g1_i1 CDS2  | 25            |
| 12 | 24.86  | 24.86 | 76.16000175 | 69.749999 | 69.74999905 | TR23770 c4_g2_i1 CDS2  | 17            |
| 13 | 24.36  | 25.09 | 49.75000024 | 48.53     | 38.47999871 | TR22071 c0_g1_i1 CDS2  | 12            |
| 14 | 23.73  | 23.73 | 94.19000149 | 81.400001 | 81.40000105 | TR20046 c0_g2_i1 CDS1  | 23            |
| 15 | 20.79  | 29.19 | 92.96000004 | 88.730001 | 88.73000145 | TR24670 c2_g1_i1 CDS2  | 65            |
| 16 | 20.53  | 20.53 | 29.57000136 | 22.03     | 22.03000039 | TR23240 c0_g1_i4 CDS2  | 29            |
| 16 | 0      | 20.53 | 29.64999974 | 22.09     | 22.08999991 | TR23240 c0_g1_i3 CDS2  | 29            |
| 17 | 16.11  | 31.2  | 85.0300014  | 85.030001 | 85.0300014  | TR23970 c2_g2_i1 CDS2  | 26            |
| 18 | 14.61  | 18.13 | 42.0599997  | 33.180001 | 29.44000065 | TR20169 c0_g1_i1 CDS1  | 10            |
| 19 | 12     | 12    | 37.16000021 | 37.16     | 37.16000021 | TR22217 c0_g1_i2 CDS1  | 7             |
| 19 | 0      | 12    | 37.16000021 | 37.16     | 37.16000021 | TR22217 c0_g1_i1 CDS1  | 7             |
| 20 | 10.13  | 10.13 | 48.08999896 | 34.43     | 34.43000019 | TR16224 c0_g1_i1 CDS1  | 6             |
| 21 | 10     | 10    | 45.57999969 | 38.100001 | 38.10000122 | TR10278 c0_g3_i1 CDS1  | 5             |
| 21 | 0      | 10    | 45.57999969 | 38.100001 | 38.10000122 | TR10278 c0_g1_i1 CDS1  | 5             |
| 21 | 0      | 8     | 45.15999854 | 45.159999 | 45.15999854 | TR10278 c0_g2_i1 CDS1  | 4             |
| 22 | 9.89   | 9.89  | 42.26999879 | 36.08     | 36.0799998  | TR21070 c0_g4_i1 CDS2  | 6             |
| 22 | 0      | 9.89  | 42.26999879 | 36.08     | 36.0799998  | TR20772 c0_g2_i1 CDS1  | 6             |
| 23 | 9.08   | 9.08  | 20.29999942 | 20.299999 | 20.29999942 | TR22181 c0_g1_i1 CDS2  | 5             |
| 24 | 8.08   | 17.93 | 95.34999728 | 76.740003 | 76.74000263 | TR24861 c1_g18_i1 CDS1 | 10            |
| 25 | 8      | 33.18 | 100         | 100       | 100         | TR23597 c1_g3_i7 CDS3  | 61            |
| 26 | 8      | 8     | 16.8599993  | 16.859999 | 16.8599993  | TR21936 c0_g1_i1 CDS4  | 4             |
| 27 | 7.72   | 12.19 | 75.3099978  | 67.900002 | 67.900002   | TR24861 c1_g3_i1 CDS3  | 19            |
| 28 | 7.33   | 7.33  | 17.33999997 | 13.54     | 13.53999972 | TR24122 c1_g2_i3 CDS2  | 4             |
| 29 | 7.15   | 8.21  | 24.4599998  | 16.46     | 14.04000074 | TR22258 c0_g1_i1 CDS1  | 5             |
| 30 | 6.28   | 6.28  | 12.1299997  | 12.13     | 10.62999964 | TR24241 c0_g1_i1 CDS3  | 3             |
| 31 | 6.06   | 37.15 | 56.90000057 | 54.24     | 46.2500006  | TR23612 c0_g1_i1 CDS1  | 31            |
| 32 | 6      | 30.91 | 93.58000159 | 89.910001 | 84.39999819 | TR24670 c2_g29_i1 CDS2 | 45            |
| 33 | 6      | 6     | 22.16999978 | 11.55     | 11.55000031 | TR21205 c0_g2_i1 CDS2  | 3             |

|    |      |       |             |           |             |                        |    |
|----|------|-------|-------------|-----------|-------------|------------------------|----|
| 34 | 6    | 6     | 24.56       | 18.86     | 18.86000037 | TR14746 c0_g1_i1 CDS1  | 3  |
| 34 | 0    | 4     | 25          | 15.710001 | 15.71000069 | TR12357 c0_g2_i1 CDS1  | 2  |
| 34 | 0    | 4     | 24.48000014 | 15.38     | 15.37999958 | TR12357 c0_g1_i1 CDS1  | 2  |
| 35 | 6    | 6     | 19.26999986 | 19.27     | 19.26999986 | TR23050 c0_g2_i1 CDS1  | 3  |
| 36 | 5.49 | 19.04 | 79.75999713 | 79.759997 | 79.75999713 | TR23597 c1_g3_i1 CDS1  | 27 |
| 36 | 0    | 17.89 | 64.3599987  | 63.370001 | 43.56000125 | TR24670 c2_g11_i1 CDS4 | 27 |
| 37 | 5.25 | 7.38  | 34.63999927 | 27.450001 | 27.45000124 | TR24676 c1_g4_i1 CDS1  | 4  |
| 37 | 0    | 4     | 34.43999887 | 34.439999 | 16.67000055 | TR24676 c1_g7_i1 CDS1  | 2  |
| 37 | 0    | 4     | 20.53000033 | 20.53     | 9.933999926 | TR24676 c1_g20_i2 CDS1 | 2  |
| 37 | 0    | 4     | 14.71000016 | 14.71     | 14.71000016 | TR24676 c1_g19_i1 CDS1 | 2  |
| 37 | 0    | 4     | 16.85000062 | 16.850001 | 16.85000062 | TR24676 c0_g1_i1 CDS1  | 2  |
| 38 | 4.81 | 4.81  | 17.46000051 | 17.460001 | 17.46000051 | TR275 c0_g2_i1 CDS2    | 3  |
| 38 | 0    | 2.72  | 9.836000204 | 9.8360002 | 9.836000204 | TR275 c0_g1_i1 CDS2    | 2  |
| 39 | 4.55 | 4.55  | 31.11000061 | 25.929999 | 25.92999935 | TR19643 c0_g1_i2 CDS8  | 3  |
| 39 | 0    | 4.55  | 31.11000061 | 25.929999 | 25.92999935 | TR19643 c0_g1_i1 CDS3  | 3  |
| 40 | 4.15 | 4.15  | 30.73000014 | 16.150001 | 12.5        | TR24403 c1_g2_i2 CDS1  | 2  |
| 40 | 0    | 2.12  | 12.06       | 9.0449996 | 5.527999997 | TR24403 c1_g2_i1 CDS3  | 1  |
| 41 | 4.1  | 5.91  | 38.15999925 | 38.159999 | 26.32000148 | TR16426 c0_g2_i1 CDS2  | 3  |
| 41 | 0    | 5.91  | 38.15999925 | 38.159999 | 26.32000148 | TR16426 c0_g1_i1 CDS2  | 3  |
| 42 | 4.03 | 4.03  | 14.98000026 | 8.9369997 | 8.936999738 | TR24398 c1_g1_i8 CDS2  | 2  |
| 42 | 0    | 4.03  | 17.38999933 | 8.9369997 | 8.936999738 | TR24398 c1_g1_i4 CDS1  | 2  |
| 43 | 4    | 26.86 | 76.74000263 | 76.740003 | 72.67000079 | TR1026 c0_g1_i1 CDS1   | 21 |
| 44 | 4    | 4.35  | 85.32000184 | 57.800001 | 57.80000091 | TR24670 c2_g4_i1 CDS1  | 3  |
| 44 | 0    | 2.03  | 61.76000237 | 30.880001 | 30.88000119 | TR24670 c2_g4_i2 CDS1  | 1  |
| 45 | 4    | 4     | 8.216000348 | 6.4130001 | 6.413000077 | TR18551 c0_g1_i1 CDS2  | 2  |
| 46 | 4    | 4     | 16.89999998 | 12.68     | 12.68000007 | TR16002 c0_g1_i2 CDS3  | 2  |
| 46 | 0    | 4     | 19.67000067 | 14.749999 | 14.74999934 | TR16002 c0_g1_i1 CDS3  | 2  |
| 47 | 4    | 4     | 19.08999979 | 19.09     | 19.08999979 | TR10789 c0_g2_i1 CDS2  | 2  |
| 48 | 3.77 | 5.39  | 15.08000046 | 8.8519998 | 8.851999789 | TR24122 c1_g2_i4 CDS2  | 3  |
| 49 | 3.74 | 16.03 | 70.69000006 | 48.280001 | 46.54999971 | TR23597 c1_g8_i3 CDS1  | 26 |
| 49 | 0    | 20.1  | 93.40999722 | 62.639999 | 60.43999791 | TR23597 c1_g8_i2 CDS1  | 38 |
| 49 | 0    | 17.89 | 64.3599987  | 63.370001 | 43.56000125 | TR24670 c2_g11_i1 CDS4 | 27 |
| 49 | 0    | 14    | 75          | 51.719999 | 31.02999926 | TR23597 c1_g9_i2 CDS1  | 25 |
| 49 | 0    | 14    | 70.69000006 | 48.280001 | 31.02999926 | TR23597 c1_g9_i3 CDS1  | 25 |
| 49 | 0    | 14    | 64.46999907 | 63.160002 | 60.53000093 | TR24670 c2_g14_i1 CDS4 | 25 |
| 49 | 0    | 12    | 56.72000051 | 55.220002 | 52.24000216 | TR24670 c2_g25_i1 CDS4 | 19 |
| 50 | 2.35 | 6.32  | 77.4600029  | 77.460003 | 66.20000005 | TR18690 c0_g3_i1 CDS1  | 7  |
| 50 | 0    | 4.41  | 67.61000156 | 67.610002 | 56.33999705 | TR18690 c0_g6_i1 CDS2  | 6  |
| 50 | 0    | 4.41  | 67.61000156 | 67.610002 | 56.33999705 | TR18690 c0_g5_i1 CDS1  | 6  |
| 50 | 0    | 4.41  | 67.61000156 | 67.610002 | 56.33999705 | TR18690 c0_g1_i1 CDS1  | 6  |
| 50 | 0    | 4     | 56.33999705 | 56.339997 | 56.33999705 | TR18690 c0_g4_i1 CDS1  | 6  |
| 51 | 2.04 | 2.04  | 20.41999996 | 11.97     | 6.338000298 | TR24569 c0_g6_i1 CDS1  | 1  |
| 51 | 0    | 2     | 15.44000059 | 6.6179998 | 6.617999822 | TR24569 c0_g7_i1 CDS1  | 1  |
| 51 | 0    | 2     | 18.75       | 8.0360003 | 8.036000282 | TR24569 c0_g5_i2 CDS1  | 1  |
| 51 | 0    | 2     | 15.44000059 | 6.6179998 | 6.617999822 | TR24569 c0_g5_i1 CDS1  | 1  |

|    |   |       |             |           |             |                        |    |
|----|---|-------|-------------|-----------|-------------|------------------------|----|
| 51 | 0 | 2     | 15.44000059 | 6.6179998 | 6.617999822 | TR24569 c0_g4_i1 CDS1  | 1  |
| 51 | 0 | 2     | 19.53999996 | 10.34     | 10.33999994 | TR24569 c0_g27_i2 CDS2 | 1  |
| 51 | 0 | 2     | 16.67000055 | 8.8239998 | 8.823999763 | TR24569 c0_g27_i1 CDS2 | 1  |
| 51 | 0 | 2     | 20.99999934 | 9.0000004 | 9.000000358 | TR24569 c0_g26_i1 CDS1 | 1  |
| 51 | 0 | 2     | 8.823999763 | 8.8239998 | 8.823999763 | TR24569 c0_g8_i2 CDS1  | 1  |
| 51 | 0 | 2     | 8.823999763 | 8.8239998 | 8.823999763 | TR24569 c0_g8_i1 CDS1  | 1  |
| 51 | 0 | 2     | 20.45000046 | 20.45     | 20.45000046 | TR24569 c0_g2_i1 CDS4  | 1  |
| 51 | 0 | 2     | 13.0400002  | 13.04     | 13.0400002  | TR24569 c0_g16_i1 CDS2 | 1  |
| 52 | 2 | 26.31 | 94.88999844 | 94.889998 | 94.88999844 | TR23597 c1_g3_i6 CDS1  | 37 |
| 52 | 0 | 14.75 | 90.90999961 | 90.91     | 90.90999961 | TR23597 c1_g3_i2 CDS1  | 19 |
| 53 | 2 | 25.98 | 70.09000182 | 65.420002 | 59.81000066 | TR23597 c1_g5_i1 CDS1  | 43 |
| 53 | 0 | 21.84 | 81.81999922 | 80.519998 | 74.02999997 | TR23597 c1_g8_i4 CDS1  | 37 |
| 53 | 0 | 14    | 57.58000016 | 56.059998 | 53.03000212 | TR23597 c1_g1_i1 CDS1  | 25 |
| 54 | 2 | 18.67 | 100         | 100       | 100         | TR24670 c2_g27_i1 CDS1 | 21 |
| 54 | 0 | 4     | 26.46999955 | 26.47     | 26.46999955 | TR24670 c2_g28_i1 CDS2 | 5  |
| 54 | 0 | 4     | 29.51000035 | 29.51     | 29.51000035 | TR24670 c2_g26_i1 CDS2 | 5  |
| 55 | 2 | 18.49 | 26.91999972 | 21.789999 | 21.78999931 | TR23240 c0_g1_i2 CDS2  | 21 |
| 56 | 2 | 18.34 | 60.14000177 | 51.450002 | 51.45000219 | TR23970 c2_g2_i2 CDS1  | 14 |
| 56 | 0 | 7.35  | 59.09000039 | 40.91     | 40.90999961 | TR10196 c0_g1_i1 CDS1  | 4  |
| 57 | 2 | 14    | 71.2199986  | 62.589997 | 62.58999705 | TR23770 c4_g2_i2 CDS1  | 9  |
| 57 | 0 | 6     | 37.34999895 | 31.330001 | 31.33000135 | TR23770 c2_g1_i1 CDS4  | 4  |
| 58 | 2 | 8.3   | 87.99999952 | 54.67     | 54.67000008 | TR24861 c1_g23_i1 CDS3 | 12 |
| 58 | 0 | 5.92  | 67.69000292 | 46.149999 | 46.1499989  | TR24861 c1_g26_i1 CDS3 | 7  |
| 59 | 2 | 5.8   | 20.8100006  | 13.57     | 13.57000023 | TR24861 c1_g19_i4 CDS1 | 3  |
| 59 | 0 | 5.8   | 32.60999918 | 32.609999 | 32.60999918 | TR24861 c1_g5_i1 CDS2  | 3  |
| 59 | 0 | 5.8   | 32.60999918 | 32.609999 | 32.60999918 | TR24861 c1_g1_i1 CDS2  | 3  |
| 59 | 0 | 5.8   | 26.55000091 | 26.550001 | 26.55000091 | TR24861 c1_g19_i5 CDS2 | 3  |
| 59 | 0 | 5.8   | 26.55000091 | 26.550001 | 26.55000091 | TR24861 c1_g19_i1 CDS2 | 3  |
| 59 | 0 | 2     | 24.59000051 | 11.48     | 11.47999987 | TR24861 c1_g17_i1 CDS1 | 1  |
| 60 | 2 | 5.25  | 48.57000113 | 38.100001 | 38.10000122 | TR24676 c1_g12_i1 CDS1 | 3  |
| 61 | 2 | 2.04  | 39.62000012 | 39.62     | 24.52999949 | TR24569 c0_g9_i1 CDS2  | 1  |
| 61 | 0 | 2.04  | 39.62000012 | 39.62     | 24.52999949 | TR24569 c0_g24_i1 CDS2 | 1  |
| 61 | 0 | 2.04  | 24.14000034 | 24.14     | 14.93999958 | TR24569 c0_g12_i2 CDS1 | 1  |
| 61 | 0 | 2.04  | 21.87999934 | 21.879999 | 13.53999972 | TR24569 c0_g12_i1 CDS1 | 1  |
| 61 | 0 | 2.04  | 19.81000006 | 19.81     | 12.25999966 | TR24569 c0_g10_i4 CDS2 | 1  |
| 61 | 0 | 2.04  | 20.58999985 | 20.59     | 12.74999976 | TR24569 c0_g10_i1 CDS2 | 1  |
| 62 | 2 | 2     | 9.29099919  | 1.956     | 1.955999993 | TR22816 c0_g1_i1 CDS1  | 1  |
| 63 | 2 | 2     | 14.05999959 | 6.25      | 6.25        | TR24122 c1_g2_i5 CDS1  | 1  |

**TABLE S9**  
 Protein summary of Protein Pilot search of rpHPLC fraction 7 (Figure 2)

| N  | Unused | Total | %Cov        | %Cov(50)  | %Cov(95)    | Accession              | Peptides(95%) |
|----|--------|-------|-------------|-----------|-------------|------------------------|---------------|
| 1  | 42.45  | 42.45 | 71.64000273 | 64.929998 | 57.84000158 | TR24241 c0_g1_i1 CDS3  | 26            |
| 2  | 30.65  | 30.65 | 53.60000134 | 52.359998 | 48.64000082 | TR23756 c1_g1_i1 CDS2  | 16            |
| 3  | 28.8   | 28.8  | 66.03999734 | 61.129999 | 61.12999916 | TR20969 c0_g1_i1 CDS1  | 22            |
| 4  | 28.73  | 28.73 | 35.1000011  | 32.789999 | 31.18000031 | TR21205 c0_g2_i1 CDS2  | 24            |
| 5  | 26.31  | 26.31 | 50.6099999  | 46.470001 | 41.60999954 | TR23970 c2_g1_i1 CDS1  | 16            |
| 6  | 24.69  | 24.69 | 65.64000249 | 62.93     | 62.15999722 | TR23770 c4_g1_i1 CDS2  | 14            |
| 6  | 0      | 24.69 | 69.11000013 | 66.259998 | 65.45000076 | TR23770 c3_g1_i1 CDS1  | 14            |
| 7  | 23.54  | 23.54 | 41.38999879 | 39.559999 | 34.25000012 | TR20112 c0_g1_i1 CDS1  | 11            |
| 8  | 22.27  | 22.27 | 82.5600028  | 82.560003 | 75.58000088 | TR20046 c0_g1_i2 CDS1  | 35            |
| 8  | 0      | 19.84 | 82.5600028  | 74.419999 | 67.4399972  | TR20046 c0_g1_i1 CDS1  | 32            |
| 9  | 20.44  | 20.44 | 83.49000216 | 83.490002 | 82.5699985  | TR24670 c2_g29_i1 CDS2 | 16            |
| 10 | 18.49  | 18.49 | 60.65000296 | 55.599999 | 48.01000059 | TR21550 c0_g1_i1 CDS1  | 14            |
| 11 | 16.71  | 18.06 | 35.78000069 | 35.780001 | 34.07000005 | TR22071 c0_g1_i1 CDS2  | 11            |
| 12 | 14.47  | 14.47 | 85.92000008 | 85.92     | 85.92000008 | TR18690 c0_g6_i1 CDS2  | 23            |
| 12 | 0      | 14.47 | 85.92000008 | 85.92     | 85.92000008 | TR18690 c0_g5_i1 CDS1  | 23            |
| 12 | 0      | 14.47 | 85.92000008 | 85.92     | 85.92000008 | TR18690 c0_g1_i1 CDS1  | 23            |
| 12 | 0      | 13.22 | 67.61000156 | 67.610002 | 67.61000156 | TR18690 c0_g3_i1 CDS1  | 22            |
| 13 | 11.66  | 11.66 | 41.15999937 | 23.190001 | 20.87000012 | TR23240 c0_g1_i4 CDS2  | 15            |
| 13 | 0      | 11.66 | 37.20999956 | 23.26     | 20.92999965 | TR23240 c0_g1_i3 CDS2  | 15            |
| 14 | 10.95  | 10.95 | 60.21999717 | 56.989998 | 46.77000046 | TR23419 c0_g6_i1 CDS1  | 7             |
| 15 | 9.25   | 15.05 | 65.53999782 | 65.539998 | 60.14000177 | TR23597 c1_g3_i3 CDS3  | 9             |
| 16 | 8.7    | 8.7   | 41.85000062 | 41.850001 | 38.0400002  | TR21550 c0_g2_i1 CDS1  | 7             |
| 17 | 8.16   | 8.16  | 32.03000128 | 22.059999 | 19.93000006 | TR23770 c4_g2_i1 CDS2  | 4             |
| 18 | 7.99   | 7.99  | 41.53000116 | 34.43     | 34.43000019 | TR16224 c0_g1_i1 CDS1  | 5             |
| 19 | 7.81   | 7.81  | 34.90000069 | 31.760001 | 27.84000039 | TR17674 c0_g1_i1 CDS2  | 6             |
| 20 | 7.42   | 7.42  | 19.16999966 | 19.17     | 19.16999966 | TR20632 c0_g1_i1 CDS1  | 4             |
| 21 | 7.01   | 9.85  | 83.56000185 | 75.340003 | 75.34000278 | TR23419 c0_g17_i1 CDS1 | 9             |
| 22 | 5.6    | 5.6   | 36.6899997  | 36.69     | 36.6899997  | TR24693 c0_g25_i4 CDS1 | 4             |
| 22 | 0      | 5.38  | 41.49000049 | 41.49     | 41.49000049 | TR24693 c0_g25_i2 CDS1 | 3             |
| 22 | 0      | 3.29  | 34.00000036 | 34        | 34.00000036 | TR24693 c0_g7_i1 CDS1  | 3             |
| 22 | 0      | 3.29  | 34.00000036 | 34        | 34.00000036 | TR24693 c0_g2_i1 CDS1  | 3             |
| 23 | 5.49   | 7.55  | 71.82999849 | 71.829998 | 71.82999849 | TR24670 c2_g1_i1 CDS2  | 11            |
| 24 | 5.18   | 7.39  | 68.84999871 | 68.849999 | 68.84999871 | TR24670 c2_g27_i1 CDS1 | 5             |
| 24 | 0      | 7.83  | 90.31999707 | 90.319997 | 67.73999929 | TR23597 c1_g3_i7 CDS3  | 8             |
| 24 | 0      | 3.49  | 26.46999955 | 26.47     | 26.46999955 | TR24670 c2_g28_i1 CDS2 | 3             |
| 24 | 0      | 3.49  | 29.51000035 | 29.51     | 29.51000035 | TR24670 c2_g26_i1 CDS2 | 3             |
| 25 | 4      | 24.38 | 76.74000263 | 69.190001 | 69.19000149 | TR1026 c0_g1_i1 CDS1   | 16            |
| 26 | 4      | 12.65 | 47.0600009  | 47.060001 | 47.0600009  | TR23970 c2_g2_i1 CDS2  | 9             |
| 26 | 0      | 6.18  | 46.66999876 | 46.669999 | 46.66999876 | TR13242 c0_g1_i1 CDS1  | 4             |
| 27 | 4      | 4     | 29.35000062 | 29.350001 | 29.35000062 | TR23314 c3_g4_i2 CDS1  | 2             |
| 28 | 3.8    | 3.8   | 68.41999888 | 45.609999 | 45.6099987  | TR23419 c0_g11_i1 CDS1 | 3             |

|    |      |       |             |           |             |                        |    |
|----|------|-------|-------------|-----------|-------------|------------------------|----|
| 29 | 3.58 | 11.75 | 59.81000066 | 57.010001 | 57.01000094 | TR23597 c1_g5_i1 CDS1  | 9  |
| 29 | 0    | 10.14 | 59.81000066 | 57.010001 | 57.01000094 | TR23597 c1_g8_i1 CDS1  | 11 |
| 29 | 0    | 10.14 | 86.48999929 | 82.429999 | 82.42999911 | TR23597 c1_g6_i1 CDS1  | 11 |
| 29 | 0    | 10.14 | 59.81000066 | 57.010001 | 57.01000094 | TR23597 c1_g4_i1 CDS1  | 11 |
| 29 | 0    | 8.37  | 80.51999807 | 76.620001 | 70.1300025  | TR23597 c1_g8_i4 CDS1  | 8  |
| 30 | 3.5  | 5.68  | 12.03999966 | 8.3329998 | 8.332999796 | TR15609 c0_g1_i1 CDS1  | 3  |
| 31 | 3.2  | 5.82  | 29.85999882 | 23.08     | 19.4600001  | TR24861 c1_g19_i4 CDS1 | 3  |
| 31 | 0    | 3.6   | 42.39000082 | 42.390001 | 33.70000124 | TR24861 c1_g5_i1 CDS2  | 2  |
| 31 | 0    | 3.6   | 42.39000082 | 42.390001 | 33.70000124 | TR24861 c1_g1_i1 CDS2  | 2  |
| 31 | 0    | 3.6   | 34.50999856 | 34.509999 | 27.4300009  | TR24861 c1_g19_i5 CDS2 | 2  |
| 31 | 0    | 3.6   | 34.50999856 | 34.509999 | 27.4300009  | TR24861 c1_g19_i1 CDS2 | 2  |
| 31 | 0    | 2.15  | 26.87999904 | 26.879999 | 18.27999949 | TR24861 c1_g7_i1 CDS2  | 1  |
| 31 | 0    | 2.15  | 30.12000024 | 30.12     | 20.47999948 | TR24861 c1_g29_i1 CDS2 | 1  |
| 31 | 0    | 2.15  | 19.68999952 | 19.69     | 13.39000016 | TR24861 c1_g19_i2 CDS1 | 1  |
| 31 | 0    | 2.15  | 30.86000085 | 30.860001 | 20.99000067 | TR24861 c1_g16_i1 CDS2 | 1  |
| 31 | 0    | 2.15  | 30.12000024 | 30.12     | 20.47999948 | TR24861 c1_g14_i1 CDS2 | 1  |
| 31 | 0    | 2.15  | 30.12000024 | 30.12     | 20.47999948 | TR24861 c1_g10_i1 CDS2 | 1  |
| 32 | 2.87 | 2.87  | 9.818000346 | 9.8180003 | 9.818000346 | TR17179 c0_g1_i1 CDS3  | 2  |
| 33 | 2.72 | 2.72  | 68.75       | 68.75     | 39.05999959 | TR7070 c0_g1_i1 CDS1   | 1  |
| 33 | 0    | 2.34  | 57.81000257 | 57.810003 | 39.05999959 | TR7070 c0_g2_i1 CDS1   | 1  |
| 34 | 2.54 | 2.54  | 27.68000066 | 19.64     | 19.64000016 | TR24693 c0_g13_i1 CDS1 | 2  |
| 34 | 0    | 2.54  | 30.14000058 | 30.140001 | 30.14000058 | TR24693 c0_g22_i1 CDS1 | 2  |
| 34 | 0    | 1.72  | 19.40000057 | 19.400001 | 19.40000057 | TR24693 c0_g8_i1 CDS1  | 1  |
| 34 | 0    | 1.72  | 19.40000057 | 19.400001 | 19.40000057 | TR24693 c0_g3_i1 CDS1  | 1  |
| 34 | 0    | 1.72  | 10.66000015 | 10.66     | 10.66000015 | TR24693 c0_g24_i1 CDS2 | 1  |
| 34 | 0    | 1.72  | 22.03000039 | 22.03     | 22.03000039 | TR24693 c0_g16_i1 CDS1 | 1  |
| 34 | 0    | 1.72  | 19.40000057 | 19.400001 | 19.40000057 | TR24693 c0_g11_i1 CDS1 | 1  |
| 34 | 0    | 1.72  | 22.03000039 | 22.03     | 22.03000039 | TR24693 c0_g10_i1 CDS1 | 1  |
| 35 | 2.47 | 2.87  | 11.91999987 | 10.75     | 6.075000018 | TR20169 c0_g1_i1 CDS1  | 2  |
| 36 | 2.16 | 18.27 | 82.5600028  | 79.070002 | 63.95000219 | TR20046 c0_g2_i1 CDS1  | 19 |
| 36 | 0    | 19.74 | 80.39000034 | 70.590001 | 64.70999718 | TR20046 c0_g1_i3 CDS1  | 23 |
| 36 | 0    | 17.36 | 88.8899982  | 67.900002 | 67.900002   | TR24861 c1_g20_i1 CDS1 | 19 |
| 36 | 0    | 6.77  | 81.4800024  | 51.849997 | 44.44000125 | TR24861 c1_g9_i2 CDS2  | 8  |
| 36 | 0    | 6.77  | 81.4800024  | 51.849997 | 44.44000125 | TR24861 c1_g9_i1 CDS3  | 8  |
| 36 | 0    | 6.77  | 81.25       | 65.630001 | 56.25       | TR24861 c1_g8_i1 CDS2  | 8  |
| 36 | 0    | 4.37  | 81.4800024  | 51.849997 | 32.10000098 | TR24861 c1_g31_i1 CDS2 | 5  |

**TABLE S10**  
 Protein summary of Protein Pilot search of rpHPLC fraction 8 (Figure 2)

| N  | Unused | Total | %Cov        | %Cov(50)  | %Cov(95)    | Accession              | Peptides(95%) |
|----|--------|-------|-------------|-----------|-------------|------------------------|---------------|
| 1  | 91.93  | 91.93 | 84.70000029 | 82.65     | 80.4099977  | TR24241 c0_g1_i1 CDS3  | 74            |
| 2  | 72.69  | 72.69 | 40.88000059 | 40.880001 | 38.33999932 | TR21205 c0_g2_i1 CDS2  | 73            |
| 3  | 45.79  | 45.79 | 59.52000022 | 54.949999 | 50.18000007 | TR20112 c0_g1_i1 CDS1  | 28            |
| 4  | 45.38  | 45.38 | 74.26000237 | 67.400002 | 56.37000203 | TR22071 c0_g1_i1 CDS2  | 29            |
| 5  | 27.43  | 27.43 | 83.7199986  | 79.070002 | 74.41999912 | TR23419 c0_g3_i1 CDS2  | 22            |
| 6  | 26.41  | 26.41 | 70.03999949 | 55.599999 | 50.5400002  | TR21550 c0_g1_i1 CDS1  | 15            |
| 7  | 23.92  | 23.92 | 46.7200011  | 41.119999 | 34.06000137 | TR23970 c2_g1_i1 CDS1  | 15            |
| 8  | 21.55  | 21.55 | 83.49000216 | 83.490002 | 82.5699985  | TR24670 c2_g29_i1 CDS2 | 18            |
| 9  | 17.96  | 18.33 | 86.29999757 | 78.079998 | 78.07999849 | TR23419 c0_g17_i1 CDS1 | 14            |
| 10 | 17.22  | 17.22 | 45.1700002  | 39.379999 | 39.37999904 | TR23770 c4_g1_i1 CDS2  | 10            |
| 10 | 0      | 17.22 | 47.56000042 | 41.460001 | 41.46000147 | TR23770 c3_g1_i1 CDS1  | 10            |
| 11 | 15.38  | 15.38 | 66.18999839 | 62.589997 | 62.58999705 | TR24693 c0_g25_i4 CDS1 | 8             |
| 12 | 15.26  | 15.26 | 79.07000184 | 77.91     | 77.91000009 | TR24861 c1_g18_i1 CDS1 | 14            |
| 13 | 12.57  | 12.57 | 28.11999917 | 17.389999 | 15.07000029 | TR23240 c0_g1_i4 CDS2  | 9             |
| 13 | 0      | 12.47 | 25.29000044 | 17.44     | 15.11999965 | TR23240 c0_g1_i3 CDS2  | 9             |
| 13 | 0      | 11.52 | 24.68000054 | 16.670001 | 16.67000055 | TR23240 c0_g1_i2 CDS2  | 9             |
| 14 | 12.45  | 12.45 | 55.62999845 | 37.32     | 37.31999993 | TR24569 c0_g6_i1 CDS1  | 8             |
| 14 | 0      | 12.32 | 52.20999718 | 38.97     | 38.96999955 | TR24569 c0_g7_i1 CDS1  | 8             |
| 14 | 0      | 12.32 | 52.20999718 | 38.97     | 38.96999955 | TR24569 c0_g5_i1 CDS1  | 8             |
| 14 | 0      | 12.32 | 52.20999718 | 38.97     | 38.96999955 | TR24569 c0_g4_i1 CDS1  | 8             |
| 15 | 12.41  | 12.41 | 38.37000132 | 31.84     | 28.15999985 | TR23063 c0_g1_i1 CDS1  | 7             |
| 15 | 0      | 10.37 | 53.96000147 | 47.479999 | 41.0100013  | TR16128 c0_g1_i1 CDS1  | 6             |
| 16 | 12.02  | 26.55 | 63.44000101 | 60.219997 | 56.98999763 | TR23419 c0_g6_i1 CDS1  | 21            |
| 17 | 11.06  | 11.06 | 23.43000025 | 17.990001 | 13.52999955 | TR24679 c0_g6_i1 CDS2  | 6             |
| 18 | 10.43  | 10.43 | 64.75999951 | 59.05     | 48.57000113 | TR24598 c0_g7_i1 CDS1  | 8             |
| 18 | 0      | 10.43 | 64.75999951 | 59.05     | 48.57000113 | TR24598 c0_g13_i1 CDS1 | 8             |
| 18 | 0      | 9.15  | 65.06000161 | 55.419999 | 51.81000233 | TR24598 c0_g14_i1 CDS1 | 6             |
| 19 | 10.35  | 10.35 | 27.48000026 | 27.48     | 25.56000054 | TR20632 c0_g1_i1 CDS1  | 5             |
| 20 | 9.41   | 9.41  | 93.48000288 | 68.480003 | 57.60999918 | TR23314 c3_g4_i2 CDS1  | 10            |
| 21 | 8.92   | 11.06 | 96.05000019 | 80.260003 | 80.26000261 | TR24241 c0_g4_i1 CDS2  | 9             |
| 21 | 0      | 11.06 | 96.05000019 | 80.260003 | 80.26000261 | TR24241 c0_g2_i1 CDS2  | 9             |
| 21 | 0      | 10.93 | 96.05000019 | 80.260003 | 80.26000261 | TR24241 c0_g3_i1 CDS2  | 9             |
| 21 | 0      | 8.82  | 86.44000292 | 76.270002 | 76.27000213 | TR24241 c0_g8_i1 CDS1  | 6             |
| 21 | 0      | 8.82  | 86.44000292 | 76.270002 | 76.27000213 | TR24241 c0_g6_i1 CDS1  | 6             |
| 21 | 0      | 8.82  | 86.44000292 | 76.270002 | 76.27000213 | TR24241 c0_g5_i1 CDS1  | 6             |
| 21 | 0      | 8.82  | 86.44000292 | 76.270002 | 76.27000213 | TR24241 c0_g10_i1 CDS1 | 6             |
| 22 | 8.79   | 8.79  | 43.79999936 | 43.799999 | 32.85000026 | TR24598 c0_g17_i2 CDS1 | 5             |
| 23 | 8.41   | 13.06 | 56.76000118 | 50.68     | 44.58999932 | TR23597 c1_g3_i3 CDS3  | 9             |
| 24 | 8.13   | 8.13  | 32.78999925 | 32.789999 | 28.96000147 | TR16224 c0_g1_i1 CDS1  | 5             |
| 24 | 0      | 6.1   | 33.57999921 | 33.579999 | 28.47000062 | TR7295 c0_g1_i1 CDS1   | 4             |
| 25 | 8.01   | 11.69 | 28.7800014  | 16.38     | 16.38000011 | TR23756 c1_g1_i1 CDS2  | 6             |

|    |      |       |             |           |             |                        |    |
|----|------|-------|-------------|-----------|-------------|------------------------|----|
| 26 | 7.95 | 12.05 | 65.64000249 | 52.149999 | 52.14999914 | TR23419 c0_g15_i1 CDS1 | 10 |
| 27 | 7.84 | 7.84  | 27.3999989  | 24.56     | 22.41999954 | TR23770 c4_g2_i1 CDS2  | 4  |
| 28 | 7.72 | 8.18  | 88.73000145 | 88.730001 | 88.73000145 | TR24670 c2_g1_i1 CDS2  | 5  |
| 29 | 7.6  | 13.72 | 75.48999786 | 67.650002 | 67.65000224 | TR20046 c0_g1_i3 CDS1  | 8  |
| 29 | 0    | 10.03 | 74.07000065 | 64.200002 | 64.20000196 | TR24861 c1_g20_i1 CDS1 | 5  |
| 30 | 7.37 | 7.37  | 53.57000232 | 45.539999 | 38.38999867 | TR24693 c0_g13_i1 CDS1 | 4  |
| 31 | 7.18 | 7.18  | 28.70000005 | 28.7      | 24.07000065 | TR21728 c0_g1_i1 CDS1  | 4  |
| 32 | 6.67 | 6.67  | 51.55000091 | 37.270001 | 17.38999933 | TR24569 c0_g3_i2 CDS2  | 3  |
| 32 | 0    | 6.57  | 51.55000091 | 37.270001 | 17.38999933 | TR24569 c0_g3_i1 CDS2  | 3  |
| 32 | 0    | 5.84  | 35.62000096 | 29.449999 | 19.17999983 | TR24569 c0_g14_i2 CDS1 | 3  |
| 32 | 0    | 5.84  | 36.62       | 30.28     | 19.72000003 | TR24569 c0_g14_i1 CDS1 | 3  |
| 33 | 6.1  | 8.65  | 45.64999938 | 45.649999 | 28.79999876 | TR21550 c0_g2_i1 CDS1  | 5  |
| 34 | 6    | 14.64 | 59.81000066 | 57.010001 | 57.01000094 | TR23597 c1_g5_i1 CDS1  | 8  |
| 34 | 0    | 14.64 | 59.81000066 | 57.010001 | 57.01000094 | TR23597 c1_g8_i1 CDS1  | 9  |
| 34 | 0    | 14.64 | 86.48999929 | 82.429999 | 82.42999911 | TR23597 c1_g6_i1 CDS1  | 9  |
| 34 | 0    | 14.64 | 59.81000066 | 57.010001 | 57.01000094 | TR23597 c1_g4_i1 CDS1  | 9  |
| 34 | 0    | 11.73 | 80.51999807 | 76.620001 | 70.1300025  | TR23597 c1_g8_i4 CDS1  | 7  |
| 35 | 6    | 8.03  | 68.84999871 | 68.849999 | 68.84999871 | TR24670 c2_g27_i1 CDS1 | 7  |
| 35 | 0    | 8.41  | 76.34000182 | 76.340002 | 67.73999929 | TR23597 c1_g3_i7 CDS3  | 7  |
| 35 | 0    | 4     | 26.46999955 | 26.47     | 26.46999955 | TR24670 c2_g28_i1 CDS2 | 3  |
| 35 | 0    | 4     | 29.51000035 | 29.51     | 29.51000035 | TR24670 c2_g26_i1 CDS2 | 3  |
| 36 | 4.73 | 4.77  | 58.81999731 | 46.079999 | 46.07999921 | TR24569 c0_g10_i1 CDS2 | 3  |
| 37 | 4.52 | 4.52  | 60.00000238 | 53.329998 | 35.55999994 | TR24693 c0_g21_i1 CDS2 | 3  |
| 37 | 0    | 4.09  | 62.30000257 | 52.460003 | 52.4600029  | TR24693 c0_g20_i1 CDS2 | 3  |
| 37 | 0    | 3.75  | 62.86000013 | 45.71     | 30.48000038 | TR24693 c0_g4_i1 CDS2  | 3  |
| 37 | 0    | 2.52  | 60.00000238 | 40.000001 | 22.22000062 | TR24693 c0_g9_i1 CDS2  | 2  |
| 38 | 4.25 | 4.25  | 19.78999972 | 19.27     | 13.01999986 | TR23050 c0_g2_i1 CDS1  | 2  |
| 39 | 4    | 4     | 18.17999929 | 18.179999 | 18.17999929 | TR10789 c0_g2_i1 CDS2  | 2  |
| 40 | 3.82 | 5.85  | 67.61000156 | 67.610002 | 67.61000156 | TR18690 c0_g6_i1 CDS2  | 5  |
| 40 | 0    | 5.85  | 67.61000156 | 67.610002 | 67.61000156 | TR18690 c0_g5_i1 CDS1  | 5  |
| 40 | 0    | 5.85  | 67.61000156 | 67.610002 | 67.61000156 | TR18690 c0_g3_i1 CDS1  | 5  |
| 40 | 0    | 5.85  | 67.61000156 | 67.610002 | 67.61000156 | TR18690 c0_g1_i1 CDS1  | 5  |
| 40 | 0    | 4     | 56.33999705 | 56.339997 | 56.33999705 | TR18690 c0_g4_i1 CDS1  | 4  |
| 41 | 3.2  | 3.2   | 25.63999891 | 17.95     | 17.94999987 | TR24679 c0_g4_i1 CDS2  | 2  |
| 42 | 2.8  | 2.8   | 11.86000034 | 10.41     | 3.147999942 | TR23612 c0_g1_i1 CDS1  | 1  |
| 42 | 0    | 2.8   | 10.40999964 | 10.41     | 3.147999942 | TR23612 c0_g1_i2 CDS1  | 1  |
| 43 | 2.67 | 6.77  | 53.25000286 | 53.250003 | 53.25000286 | TR24598 c0_g17_i1 CDS1 | 5  |
| 43 | 0    | 4.71  | 50.78999996 | 50.79     | 50.78999996 | TR24598 c0_g1_i1 CDS1  | 4  |
| 44 | 2.51 | 2.51  | 7.838000357 | 6.4130001 | 6.413000077 | TR24122 c1_g2_i3 CDS2  | 2  |
| 44 | 0    | 1.77  | 14.92999941 | 14.929999 | 14.92999941 | TR35618 c0_g1_i1 CDS1  | 1  |
| 44 | 0    | 1.77  | 4.425000027 | 4.425     | 4.425000027 | TR24122 c1_g2_i6 CDS3  | 1  |
| 44 | 0    | 1.77  | 4.425000027 | 4.425     | 4.425000027 | TR24122 c1_g2_i1 CDS2  | 1  |
| 45 | 2.15 | 7.76  | 67.61000156 | 61.970001 | 45.77000141 | TR24598 c0_g18_i1 CDS2 | 6  |
| 45 | 0    | 6.83  | 26.62999928 | 20.110001 | 18.4799999  | TR24598 c0_g10_i1 CDS1 | 4  |
| 45 | 0    | 5.53  | 79.79000211 | 71.280003 | 58.50999951 | TR24598 c0_g4_i1 CDS2  | 4  |

|    |      |       |             |           |             |                        |    |
|----|------|-------|-------------|-----------|-------------|------------------------|----|
| 45 | 0    | 2     | 32.87999928 | 16.44     | 16.43999964 | TR24598 c0_g10_i4 CDS1 | 1  |
| 46 | 2.06 | 2.58  | 28.96000147 | 11.31     | 7.69200027  | TR24861 c1_g19_i4 CDS1 | 1  |
| 46 | 0    | 2.58  | 43.36000085 | 22.12     | 15.03999978 | TR24861 c1_g19_i5 CDS2 | 1  |
| 46 | 0    | 2.57  | 42.39000082 | 27.169999 | 18.4799999  | TR24861 c1_g5_i1 CDS2  | 1  |
| 46 | 0    | 2.57  | 42.39000082 | 27.169999 | 18.4799999  | TR24861 c1_g1_i1 CDS2  | 1  |
| 46 | 0    | 2.57  | 34.50999856 | 22.12     | 15.03999978 | TR24861 c1_g19_i1 CDS2 | 1  |
| 46 | 0    | 2.52  | 26.87999904 | 26.879999 | 18.27999949 | TR24861 c1_g7_i1 CDS2  | 1  |
| 46 | 0    | 2.52  | 30.12000024 | 30.12     | 20.47999948 | TR24861 c1_g29_i1 CDS2 | 1  |
| 46 | 0    | 2.52  | 19.68999952 | 19.69     | 13.39000016 | TR24861 c1_g19_i2 CDS1 | 1  |
| 46 | 0    | 2.52  | 30.86000085 | 30.860001 | 20.99000067 | TR24861 c1_g16_i1 CDS2 | 1  |
| 46 | 0    | 2.52  | 30.12000024 | 30.12     | 20.47999948 | TR24861 c1_g14_i1 CDS2 | 1  |
| 46 | 0    | 2.52  | 30.12000024 | 30.12     | 20.47999948 | TR24861 c1_g10_i1 CDS2 | 1  |
| 46 | 0    | 2.52  | 32.89000094 | 32.890001 | 22.37000018 | TR16426 c0_g1_i1 CDS2  | 1  |
| 47 | 2.05 | 2.49  | 62.76999712 | 36.17     | 19.14999932 | TR24693 c0_g1_i1 CDS2  | 1  |
| 47 | 0    | 2.45  | 57.31999874 | 41.460001 | 21.95000052 | TR32174 c0_g1_i1 CDS1  | 1  |
| 48 | 2    | 20.16 | 65.09000063 | 57.4      | 57.4000001  | TR5610 c0_g1_i1 CDS1   | 14 |
| 49 | 2    | 12.15 | 39.03999925 | 39.039999 | 39.03999925 | TR23970 c2_g2_i1 CDS2  | 8  |
| 49 | 0    | 7.28  | 46.66999876 | 46.669999 | 46.66999876 | TR13242 c0_g1_i1 CDS1  | 4  |
| 50 | 2    | 9.11  | 44.20000017 | 44.2      | 38.40999901 | TR23970 c2_g2_i2 CDS1  | 5  |
| 50 | 0    | 2.81  | 28.79000008 | 28.79     | 28.79000008 | TR10196 c0_g1_i1 CDS1  | 2  |
| 51 | 2    | 9.08  | 69.73999739 | 69.739997 | 69.73999739 | TR24241 c0_g9_i1 CDS2  | 7  |
| 52 | 2    | 8.02  | 65.52000046 | 59.77     | 59.76999998 | TR24693 c0_g18_i1 CDS1 | 4  |
| 53 | 2    | 7.67  | 39.57000077 | 38.13     | 38.13000023 | TR23770 c4_g2_i2 CDS1  | 4  |
| 53 | 0    | 3.49  | 28.92000079 | 19.28     | 19.28000003 | TR23770 c2_g1_i1 CDS4  | 2  |
| 54 | 2    | 7.08  | 72.14999795 | 65.820003 | 65.82000256 | TR24693 c0_g17_i1 CDS1 | 4  |
| 54 | 0    | 4     | 33.32999945 | 27.590001 | 27.59000063 | TR24693 c0_g12_i1 CDS1 | 2  |
| 55 | 2    | 6.9   | 66.67000055 | 66.670001 | 66.67000055 | TR24861 c1_g3_i1 CDS3  | 6  |
| 56 | 2    | 5.77  | 61.40000224 | 61.400002 | 61.40000224 | TR23419 c0_g11_i1 CDS1 | 4  |
| 57 | 2    | 3.68  | 42.19999909 | 33.939999 | 20.18000036 | TR24569 c0_g3_i4 CDS2  | 2  |
| 57 | 0    | 3.68  | 49.4599998  | 39.78     | 23.65999967 | TR24569 c0_g3_i3 CDS2  | 2  |
| 57 | 0    | 2.13  | 30.00000119 | 30.000001 | 18.33000034 | TR24569 c0_g28_i1 CDS2 | 1  |
| 58 | 2    | 2.37  | 39.71000016 | 39.71     | 39.71000016 | TR24670 c2_g9_i1 CDS2  | 2  |
| 58 | 0    | 2.37  | 39.71000016 | 39.71     | 39.71000016 | TR24670 c2_g3_i1 CDS2  | 2  |
| 59 | 2    | 2     | 6.198000163 | 4.132     | 4.131999984 | TR23050 c0_g2_i1 CDS7  | 1  |
| 59 | 0    | 2     | 8.620999753 | 8.6209998 | 8.620999753 | TR3315 c0_g1_i1 CDS2   | 1  |
| 60 | 2    | 2     | 9.301999956 | 3.4880001 | 3.48800011  | TR20170 c1_g1_i1 CDS1  | 1  |
| 60 | 0    | 2     | 34.40999985 | 12.899999 | 12.89999932 | TR16730 c0_g1_i1 CDS4  | 1  |
| 61 | 2    | 2     | 16.97999984 | 16.98     | 16.97999984 | TR24679 c0_g2_i1 CDS3  | 1  |
| 62 | 2    | 2     | 6.16700016  | 6.1670002 | 6.16700016  | TR18812 c0_g1_i1 CDS4  | 1  |



TABLE S11
Protein summary of Protein Pilot search of rpHPLC fraction 9 (Figure 2)

| N  | Unused | Total | %Cov        | %Cov(50)  | %Cov(95)    | Accession              | Peptides(95%) |
|----|--------|-------|-------------|-----------|-------------|------------------------|---------------|
| 1  | 58.82  | 58.82 | 76.23000145 | 73.909998 | 73.04000258 | TR23240 c0_g1_i4 CDS2  | 85            |
| 2  | 29.53  | 29.53 | 62.5        | 62.5      | 57.5600028  | TR20170 c1_g1_i1 CDS1  | 18            |
| 3  | 29.32  | 29.32 | 83.89999866 | 78.649998 | 72.65999913 | TR23063 c0_g1_i3 CDS1  | 20            |
| 4  | 29.11  | 53.75 | 95.02000213 | 89.590001 | 88.23999763 | TR24861 c1_g19_i4 CDS1 | 79            |
| 5  | 27.11  | 29.54 | 87.09999919 | 87.099999 | 87.09999919 | TR13307 c0_g3_i1 CDS1  | 60            |
| 5  | 0      | 29.54 | 87.09999919 | 87.099999 | 87.09999919 | TR13307 c0_g2_i1 CDS1  | 60            |
| 6  | 24.8   | 24.8  | 37.40999997 | 37.41     | 37.40999997 | TR21205 c0_g2_i1 CDS2  | 15            |
| 7  | 19.47  | 19.47 | 53.39999795 | 39.01     | 39.01000023 | TR15320 c0_g1_i1 CDS3  | 10            |
| 8  | 19.4   | 19.4  | 76.05999708 | 76.059997 | 64.07999992 | TR24569 c0_g14_i1 CDS1 | 12            |
| 8  | 0      | 17.15 | 64.38000202 | 64.380002 | 52.74000168 | TR24569 c0_g14_i2 CDS1 | 11            |
| 9  | 19.33  | 19.33 | 31.86999857 | 31.389999 | 26.03000104 | TR23970 c2_g1_i1 CDS1  | 9             |
| 10 | 19.22  | 19.22 | 56.61000013 | 44.209999 | 38.42999935 | TR23050 c0_g2_i1 CDS7  | 9             |
| 11 | 17.99  | 17.99 | 80.98000288 | 72.390002 | 72.39000201 | TR23419 c0_g15_i1 CDS1 | 18            |
| 12 | 17.14  | 17.14 | 75.36000013 | 62.559998 | 58.77000093 | TR7566 c0_g2_i1 CDS1   | 12            |
| 12 | 0      | 16.96 | 72.50999808 | 62.559998 | 58.77000093 | TR7566 c0_g1_i1 CDS1   | 12            |
| 13 | 16.03  | 16.03 | 61.97000146 | 55.629998 | 55.62999845 | TR24569 c0_g6_i1 CDS1  | 12            |
| 13 | 0      | 15.96 | 58.09000134 | 58.090001 | 58.09000134 | TR24569 c0_g7_i1 CDS1  | 12            |
| 13 | 0      | 15.96 | 58.09000134 | 58.090001 | 58.09000134 | TR24569 c0_g5_i1 CDS1  | 12            |
| 13 | 0      | 15.96 | 58.09000134 | 58.090001 | 58.09000134 | TR24569 c0_g4_i1 CDS1  | 12            |
| 14 | 14.91  | 14.99 | 72.82999754 | 66.299999 | 66.29999876 | TR15592 c0_g1_i1 CDS2  | 15            |
| 15 | 13.96  | 13.96 | 56.83000088 | 56.830001 | 56.83000088 | TR24693 c0_g25_i4 CDS1 | 7             |
| 16 | 13.92  | 19.82 | 86.14000082 | 80.199999 | 80.19999862 | TR24861 c1_g24_i2 CDS1 | 40            |
| 17 | 13.48  | 13.5  | 80.21000028 | 78.130001 | 78.13000083 | TR24569 c0_g12_i1 CDS1 | 8             |
| 17 | 0      | 13.5  | 72.64000177 | 70.749998 | 70.74999809 | TR24569 c0_g10_i4 CDS2 | 8             |
| 18 | 12.71  | 12.71 | 44.04000044 | 38.63     | 32.13       | TR21550 c0_g1_i1 CDS1  | 8             |
| 19 | 12.31  | 12.31 | 97.46000171 | 91.530001 | 91.53000116 | TR5441 c0_g2_i1 CDS1   | 15            |
| 20 | 12.08  | 12.08 | 46.88000083 | 43.23     | 43.23000014 | TR23050 c0_g2_i1 CDS1  | 7             |
| 21 | 11.35  | 23.66 | 100         | 89.469999 | 89.46999907 | TR16426 c0_g2_i1 CDS2  | 47            |
| 22 | 10.41  | 10.41 | 39.77000117 | 35.139999 | 35.13999879 | TR23770 c4_g1_i1 CDS2  | 6             |
| 22 | 0      | 10.41 | 41.87000096 | 36.989999 | 36.98999882 | TR23770 c3_g1_i1 CDS1  | 6             |
| 23 | 10.25  | 10.25 | 68.62999797 | 44.119999 | 38.24000061 | TR20046 c0_g1_i3 CDS1  | 6             |
| 23 | 0      | 8.23  | 68.59999895 | 39.53     | 32.55999982 | TR20046 c0_g2_i1 CDS1  | 5             |
| 24 | 10     | 19.78 | 96.11999989 | 89.920002 | 68.9899981  | TR24861 c1_g28_i2 CDS1 | 21            |
| 24 | 0      | 19.78 | 76.3800025  | 70.08     | 70.08000016 | TR24861 c1_g28_i3 CDS2 | 21            |
| 25 | 9.23   | 9.23  | 27.61000097 | 23.88     | 20.90000063 | TR20089 c0_g1_i1 CDS1  | 5             |
| 26 | 8.01   | 8.01  | 14.29000005 | 10.99     | 10.98999977 | TR20112 c0_g1_i1 CDS1  | 4             |
| 27 | 8      | 21.78 | 76.3800025  | 70.08     | 70.08000016 | TR24861 c1_g28_i1 CDS1 | 16            |
| 28 | 7.8    | 7.8   | 75.70999861 | 75.709999 | 67.14000106 | TR23314 c3_g4_i1 CDS1  | 8             |
| 29 | 7.44   | 7.44  | 29.12999988 | 29.13     | 29.12999988 | TR23314 c2_g9_i1 CDS1  | 8             |
| 29 | 0      | 7.44  | 26.32000148 | 26.320001 | 26.32000148 | TR23314 c2_g8_i1 CDS2  | 8             |
| 29 | 0      | 7.44  | 26.32000148 | 26.320001 | 26.32000148 | TR23314 c2_g6_i1 CDS2  | 8             |

|    |      |       |             |           |             |                        |    |
|----|------|-------|-------------|-----------|-------------|------------------------|----|
| 29 | 0    | 7.44  | 26.32000148 | 26.320001 | 26.32000148 | TR23314 c2_g4_i1 CDS2  | 8  |
| 29 | 0    | 7.44  | 26.32000148 | 26.320001 | 26.32000148 | TR23314 c2_g2_i1 CDS2  | 8  |
| 29 | 0    | 6     | 15.25000036 | 15.25     | 15.25000036 | TR23314 c2_g7_i1 CDS1  | 6  |
| 29 | 0    | 6     | 15.25000036 | 15.25     | 15.25000036 | TR23314 c2_g5_i1 CDS1  | 6  |
| 29 | 0    | 6     | 15.25000036 | 15.25     | 15.25000036 | TR23314 c2_g3_i1 CDS1  | 6  |
| 30 | 6.95 | 6.95  | 67.86000133 | 60.710001 | 44.63999867 | TR24693 c0_g13_i1 CDS1 | 3  |
| 31 | 6.82 | 9.14  | 24.77000058 | 17.76     | 15.88999927 | TR20169 c0_g1_i1 CDS1  | 5  |
| 32 | 6.43 | 6.43  | 24.56       | 22.42     | 22.41999954 | TR23770 c4_g2_i1 CDS2  | 4  |
| 33 | 6.1  | 6.1   | 44.76000071 | 44.760001 | 37.13999987 | TR24598 c0_g7_i1 CDS1  | 3  |
| 33 | 0    | 6.1   | 44.76000071 | 44.760001 | 37.13999987 | TR24598 c0_g13_i1 CDS1 | 3  |
| 33 | 0    | 6     | 46.9900012  | 46.990001 | 46.9900012  | TR24598 c0_g14_i1 CDS1 | 3  |
| 34 | 6.06 | 6.06  | 40.88000059 | 25.549999 | 25.54999888 | TR24598 c0_g17_i2 CDS1 | 3  |
| 34 | 0    | 4.05  | 46.52999938 | 25.740001 | 25.74000061 | TR24598 c0_g11_i1 CDS1 | 2  |
| 35 | 6    | 12.61 | 48.9199996  | 45.699999 | 38.17000091 | TR23419 c0_g6_i1 CDS1  | 7  |
| 35 | 0    | 12    | 75.55999756 | 75.559998 | 75.55999756 | TR23419 c0_g13_i1 CDS2 | 8  |
| 35 | 0    | 10.07 | 55.04000187 | 41.859999 | 41.8599993  | TR23419 c0_g3_i1 CDS2  | 6  |
| 35 | 0    | 8     | 53.60999703 | 53.609997 | 53.60999703 | TR23419 c0_g16_i2 CDS1 | 5  |
| 35 | 0    | 8     | 54.17000055 | 54.170001 | 54.17000055 | TR23419 c0_g16_i1 CDS1 | 5  |
| 36 | 5.46 | 5.46  | 60.00000238 | 35.56     | 35.55999994 | TR24693 c0_g9_i1 CDS2  | 3  |
| 36 | 0    | 5.46  | 51.42999887 | 30.48     | 30.48000038 | TR24693 c0_g4_i1 CDS2  | 3  |
| 36 | 0    | 5.46  | 54.54999804 | 41.56     | 41.56000018 | TR24693 c0_g6_i1 CDS2  | 3  |
| 36 | 0    | 4     | 52.4600029  | 36.070001 | 36.07000113 | TR24693 c0_g27_i1 CDS2 | 2  |
| 37 | 5.23 | 42.63 | 76.59999728 | 74.040002 | 73.0799973  | TR23240 c0_g1_i2 CDS2  | 66 |
| 38 | 5.14 | 5.14  | 37.95999885 | 21.9      | 21.89999968 | TR23597 c1_g3_i6 CDS1  | 3  |
| 38 | 0    | 4.25  | 43.23999882 | 28.380001 | 14.1900003  | TR23597 c1_g3_i3 CDS3  | 2  |
| 38 | 0    | 4.04  | 33.59000087 | 16.410001 | 16.41000062 | TR23597 c1_g3_i8 CDS1  | 2  |
| 38 | 0    | 4.04  | 51.19000077 | 25        | 25          | TR23597 c1_g3_i1 CDS1  | 2  |
| 39 | 5.11 | 5.11  | 68.66000295 | 61.189997 | 61.1899972  | TR23314 c3_g1_i1 CDS2  | 6  |
| 40 | 4.95 | 4.95  | 44.15999949 | 44.159999 | 44.15999949 | TR23597 c1_g8_i4 CDS1  | 3  |
| 40 | 0    | 4.95  | 31.77999854 | 31.779999 | 31.77999854 | TR23597 c1_g8_i1 CDS1  | 3  |
| 40 | 0    | 4.95  | 45.95000148 | 45.950001 | 45.95000148 | TR23597 c1_g6_i1 CDS1  | 3  |
| 40 | 0    | 4.95  | 31.77999854 | 31.779999 | 31.77999854 | TR23597 c1_g5_i1 CDS1  | 3  |
| 40 | 0    | 4.95  | 31.77999854 | 31.779999 | 31.77999854 | TR23597 c1_g4_i1 CDS1  | 3  |
| 41 | 4.6  | 4.6   | 33.88000131 | 20.22     | 20.21999955 | TR16224 c0_g1_i1 CDS1  | 3  |
| 41 | 0    | 2.87  | 35.04000008 | 16.79     | 16.78999996 | TR7295 c0_g1_i1 CDS1   | 2  |
| 42 | 4.31 | 11.54 | 41.17999971 | 41.18     | 34.31000113 | TR24569 c0_g27_i1 CDS2 | 7  |
| 42 | 0    | 9.27  | 42.53000021 | 42.53     | 34.47999954 | TR24569 c0_g27_i2 CDS2 | 6  |
| 42 | 0    | 7.93  | 49.30000007 | 36.62     | 36.62       | TR24569 c0_g1_i1 CDS2  | 5  |
| 42 | 0    | 7.93  | 49.30000007 | 36.62     | 36.62       | TR24569 c0_g17_i1 CDS2 | 5  |
| 43 | 4.28 | 4.28  | 43.11999977 | 43.12     | 36.70000136 | TR23529 c0_g1_i1 CDS2  | 3  |
| 43 | 0    | 4.28  | 40.169999   | 40.169999 | 34.18999991 | TR23529 c0_g13_i1 CDS1 | 3  |
| 44 | 4.12 | 6.14  | 36.9599998  | 36.96     | 32.06999898 | TR21550 c0_g2_i1 CDS1  | 3  |
| 45 | 4    | 7.4   | 65.11999965 | 65.12     | 65.11999965 | TR13534 c0_g1_i2 CDS1  | 6  |
| 46 | 4    | 6     | 67.61000156 | 67.610002 | 67.61000156 | TR18690 c0_g6_i1 CDS2  | 3  |
| 46 | 0    | 6     | 67.61000156 | 67.610002 | 67.61000156 | TR18690 c0_g5_i1 CDS1  | 3  |

|    |      |       |             |           |             |                        |   |
|----|------|-------|-------------|-----------|-------------|------------------------|---|
| 46 | 0    | 6     | 67.61000156 | 67.610002 | 67.61000156 | TR18690 c0_g3_i1 CDS1  | 3 |
| 46 | 0    | 6     | 67.61000156 | 67.610002 | 67.61000156 | TR18690 c0_g1_i1 CDS1  | 3 |
| 46 | 0    | 4     | 56.33999705 | 56.339997 | 56.33999705 | TR18690 c0_g4_i1 CDS1  | 2 |
| 47 | 4    | 4     | 8.021999896 | 5.5969998 | 5.596999824 | TR24241 c0_g1_i1 CDS3  | 2 |
| 48 | 3.64 | 14.94 | 49.07000065 | 45.339999 | 40.99000096 | TR24569 c0_g3_i1 CDS2  | 9 |
| 48 | 0    | 14.1  | 45.3399986  | 45.339999 | 35.40000021 | TR24569 c0_g3_i2 CDS2  | 8 |
| 48 | 0    | 8.08  | 75.99999905 | 75.999999 | 75.99999905 | TR24569 c0_g22_i1 CDS1 | 5 |
| 49 | 3.03 | 3.27  | 66.67000055 | 66.670001 | 55.00000119 | TR24569 c0_g28_i1 CDS2 | 2 |
| 50 | 2.69 | 4.74  | 47.22000062 | 47.220001 | 47.22000062 | TR24861 c0_g1_i1 CDS1  | 7 |
| 51 | 2.19 | 3.21  | 79.57000136 | 64.520001 | 41.94000065 | TR23597 c1_g3_i7 CDS3  | 2 |
| 51 | 0    | 2     | 67.61000156 | 42.250001 | 42.25000143 | TR24670 c2_g1_i1 CDS2  | 1 |
| 52 | 2.15 | 7.91  | 75.99999905 | 75.999999 | 75.99999905 | TR24569 c0_g20_i1 CDS1 | 6 |
| 53 | 2.03 | 8.91  | 38.24000061 | 29.409999 | 29.40999866 | TR24569 c0_g8_i2 CDS1  | 6 |
| 53 | 0    | 10.34 | 51.34999752 | 51.349998 | 51.34999752 | TR24569 c0_g8_i3 CDS1  | 7 |
| 53 | 0    | 8.91  | 38.24000061 | 29.409999 | 29.40999866 | TR24569 c0_g8_i1 CDS1  | 6 |
| 54 | 2.03 | 3.56  | 44.8300004  | 27.590001 | 27.59000063 | TR24693 c0_g12_i1 CDS1 | 2 |
| 54 | 0    | 6     | 55.69999814 | 55.699998 | 55.69999814 | TR24693 c0_g17_i1 CDS1 | 3 |
| 55 | 2.01 | 2.01  | 6.617999822 | 3.4309998 | 3.430999815 | TR22071 c0_g1_i1 CDS2  | 1 |
| 56 | 2    | 10.23 | 68.59999895 | 56.980002 | 50          | TR20046 c0_g1_i2 CDS1  | 7 |
| 56 | 0    | 10.23 | 68.59999895 | 56.980002 | 50          | TR20046 c0_g1_i1 CDS1  | 7 |
| 56 | 0    | 6.19  | 50          | 38.370001 | 31.40000105 | TR24861 c1_g18_i1 CDS1 | 4 |
| 56 | 0    | 4.15  | 66.67000055 | 50.79     | 41.26999974 | TR24861 c1_g15_i1 CDS2 | 3 |
| 57 | 2    | 10.06 | 76.19000077 | 76.190001 | 67.86000133 | TR24569 c0_g23_i1 CDS1 | 6 |
| 58 | 2    | 10.03 | 75.48999786 | 66.670001 | 66.67000055 | TR24569 c0_g10_i1 CDS2 | 6 |
| 58 | 0    | 7.72  | 62.88999915 | 62.889999 | 62.88999915 | TR24569 c0_g11_i1 CDS1 | 5 |
| 58 | 0    | 5.68  | 47.42000103 | 47.420001 | 47.42000103 | TR24569 c0_g19_i1 CDS1 | 4 |
| 58 | 0    | 5.68  | 61.7299974  | 61.729997 | 61.7299974  | TR24569 c0_g13_i1 CDS1 | 4 |
| 58 | 0    | 2     | 56.25       | 56.25     | 56.25       | TR24569 c0_g10_i2 CDS1 | 1 |
| 59 | 2    | 8     | 26.73999965 | 26.74     | 26.73999965 | TR23970 c2_g2_i1 CDS2  | 4 |
| 59 | 0    | 4.2   | 40.95000029 | 39.050001 | 25.70999861 | TR13242 c0_g1_i1 CDS1  | 2 |
| 60 | 2    | 6.23  | 34.77999866 | 33.329999 | 23.19000065 | TR23970 c2_g2_i2 CDS1  | 3 |
| 60 | 0    | 2     | 18.17999929 | 18.179999 | 18.17999929 | TR10196 c0_g1_i1 CDS1  | 1 |
| 61 | 2    | 5.46  | 60.00000238 | 35.56     | 35.55999994 | TR24693 c0_g21_i1 CDS2 | 3 |
| 61 | 0    | 4     | 52.4600029  | 36.070001 | 36.07000113 | TR24693 c0_g20_i1 CDS2 | 2 |
| 62 | 2    | 4     | 73.6800015  | 61.400002 | 61.40000224 | TR23419 c0_g11_i1 CDS1 | 4 |
| 63 | 2    | 4     | 31.90999925 | 31.909999 | 31.90999925 | TR24598 c0_g4_i1 CDS2  | 2 |
| 63 | 0    | 4     | 21.13000005 | 21.13     | 21.13000005 | TR24598 c0_g18_i1 CDS2 | 2 |
| 63 | 0    | 4     | 16.30000025 | 16.3      | 16.30000025 | TR24598 c0_g10_i1 CDS1 | 2 |
| 63 | 0    | 2     | 16.43999964 | 16.44     | 16.43999964 | TR24598 c0_g10_i4 CDS1 | 1 |
| 64 | 2    | 3.51  | 32.10999966 | 24.770001 | 24.77000058 | TR24670 c2_g29_i1 CDS2 | 2 |
| 65 | 2    | 2     | 11.98000014 | 6.7709997 | 6.77099973  | TR24403 c1_g2_i2 CDS1  | 1 |
| 66 | 2    | 2     | 10.58999971 | 5.5879999 | 5.587999895 | TR22070 c0_g1_i1 CDS2  | 1 |
| 67 | 2    | 2     | 6.701000035 | 6.701     | 6.701000035 | TR21070 c0_g4_i1 CDS2  | 1 |
| 67 | 0    | 2     | 6.701000035 | 6.701     | 6.701000035 | TR20772 c0_g2_i1 CDS1  | 1 |
| 68 | 2    | 2     | 14.55000043 | 14.55     | 14.55000043 | TR10789 c0_g2_i1 CDS2  | 1 |
