# Supplementary figures and images for: True Lies: Using Proteomics to Assess the Accuracy of Transcriptome-Based Venomics in Centipedes Uncovers False Positives and Reveals Startling Intraspecific Variation in Scolopendra subspinipes
Source: MDPI journal article supplement (doi:10.3390/toxins10030096), 2018-02-28

BPFTx

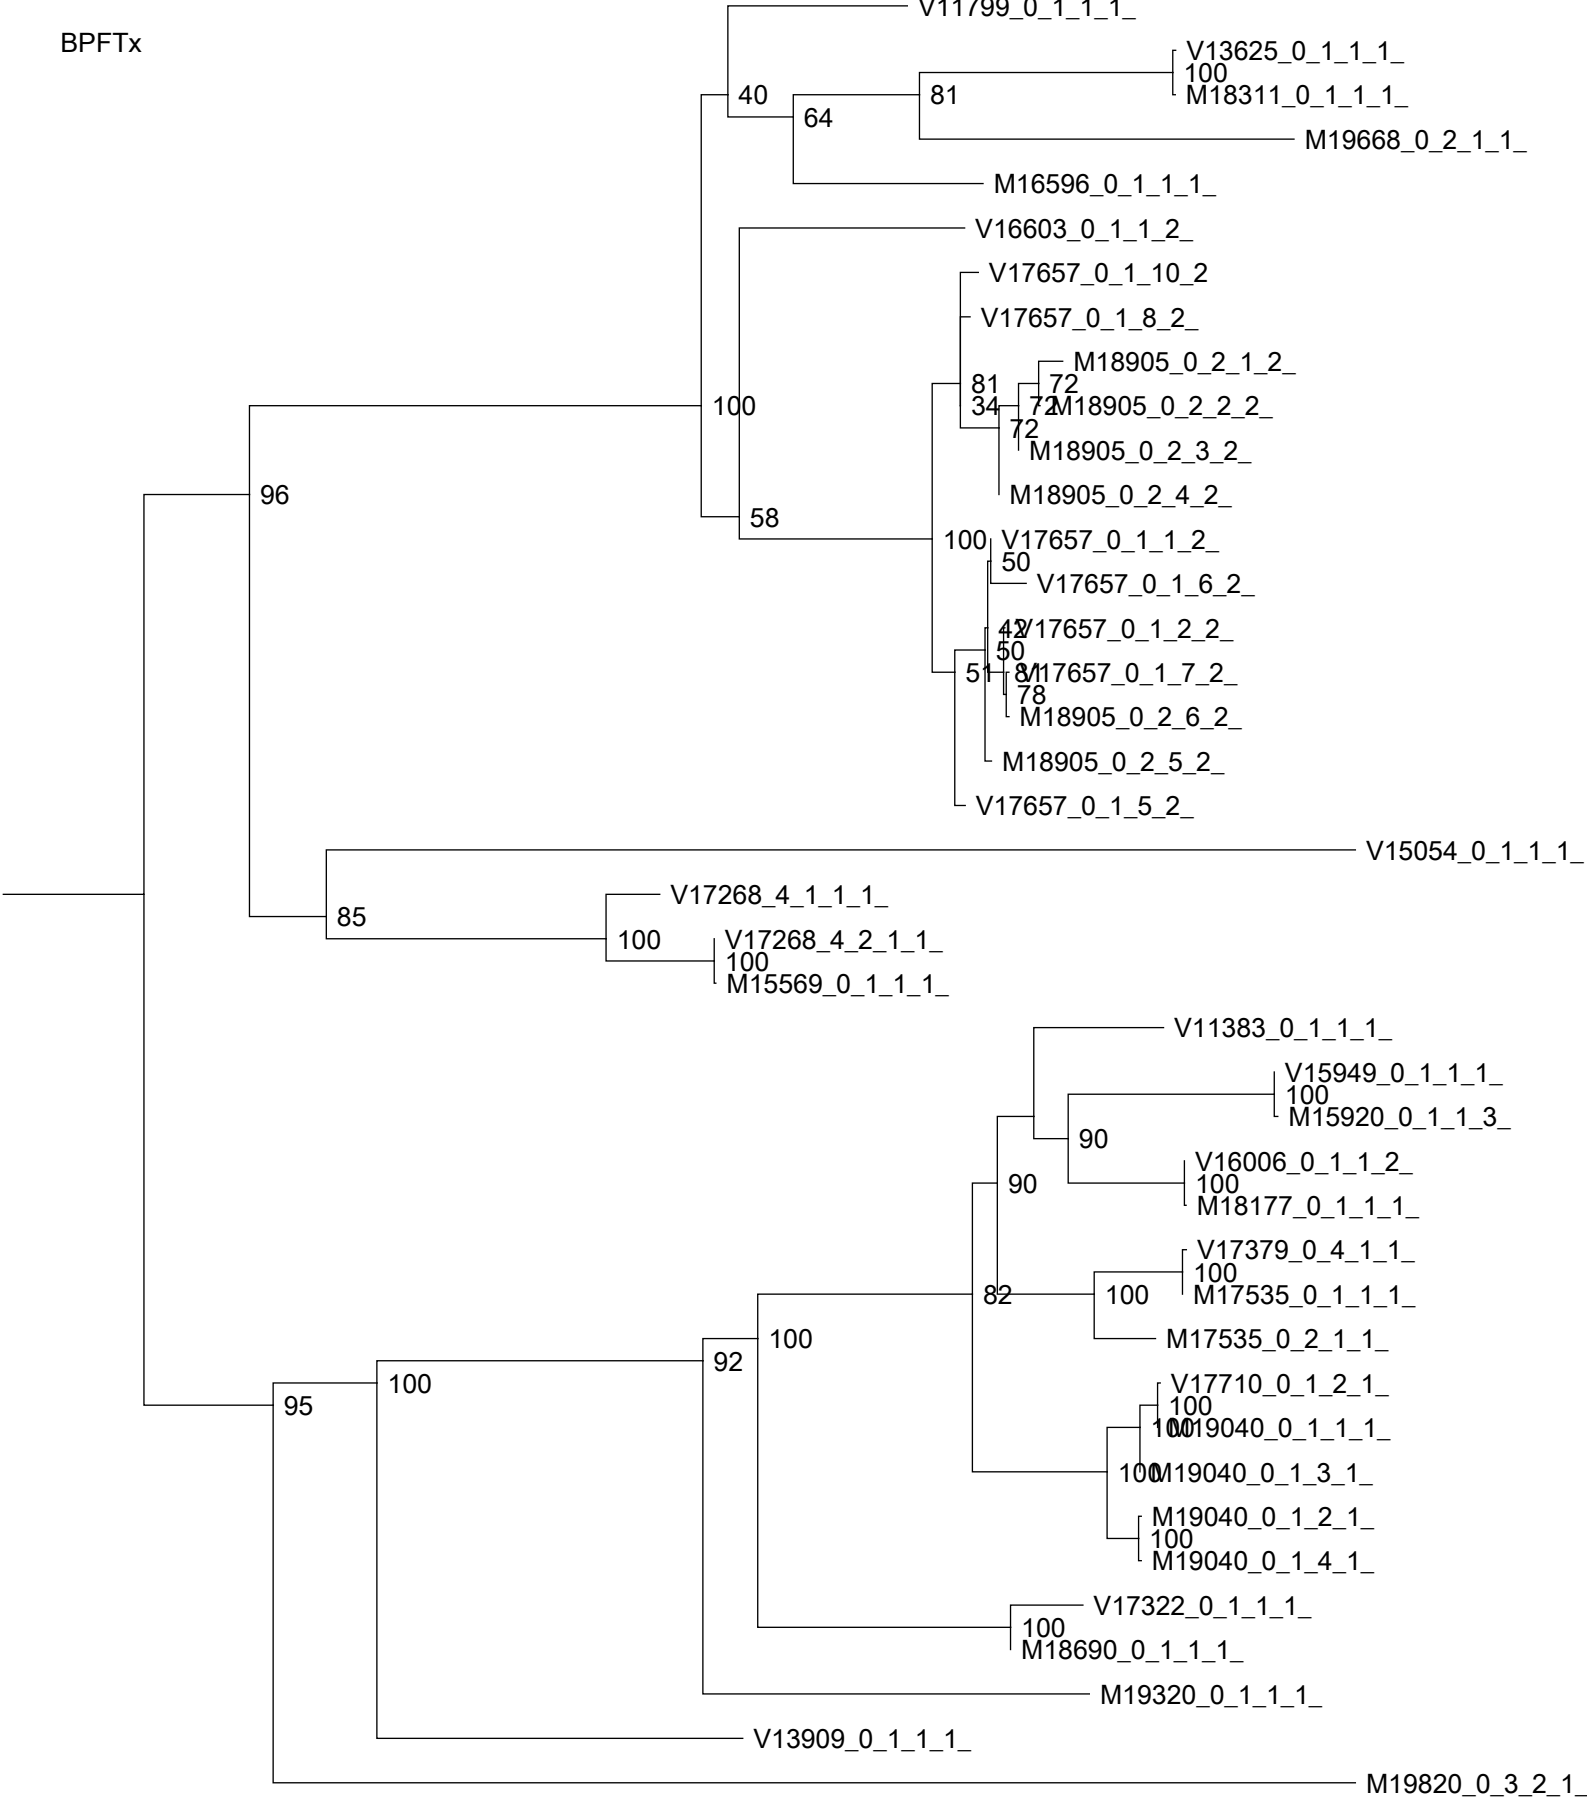

0.1

CAP1

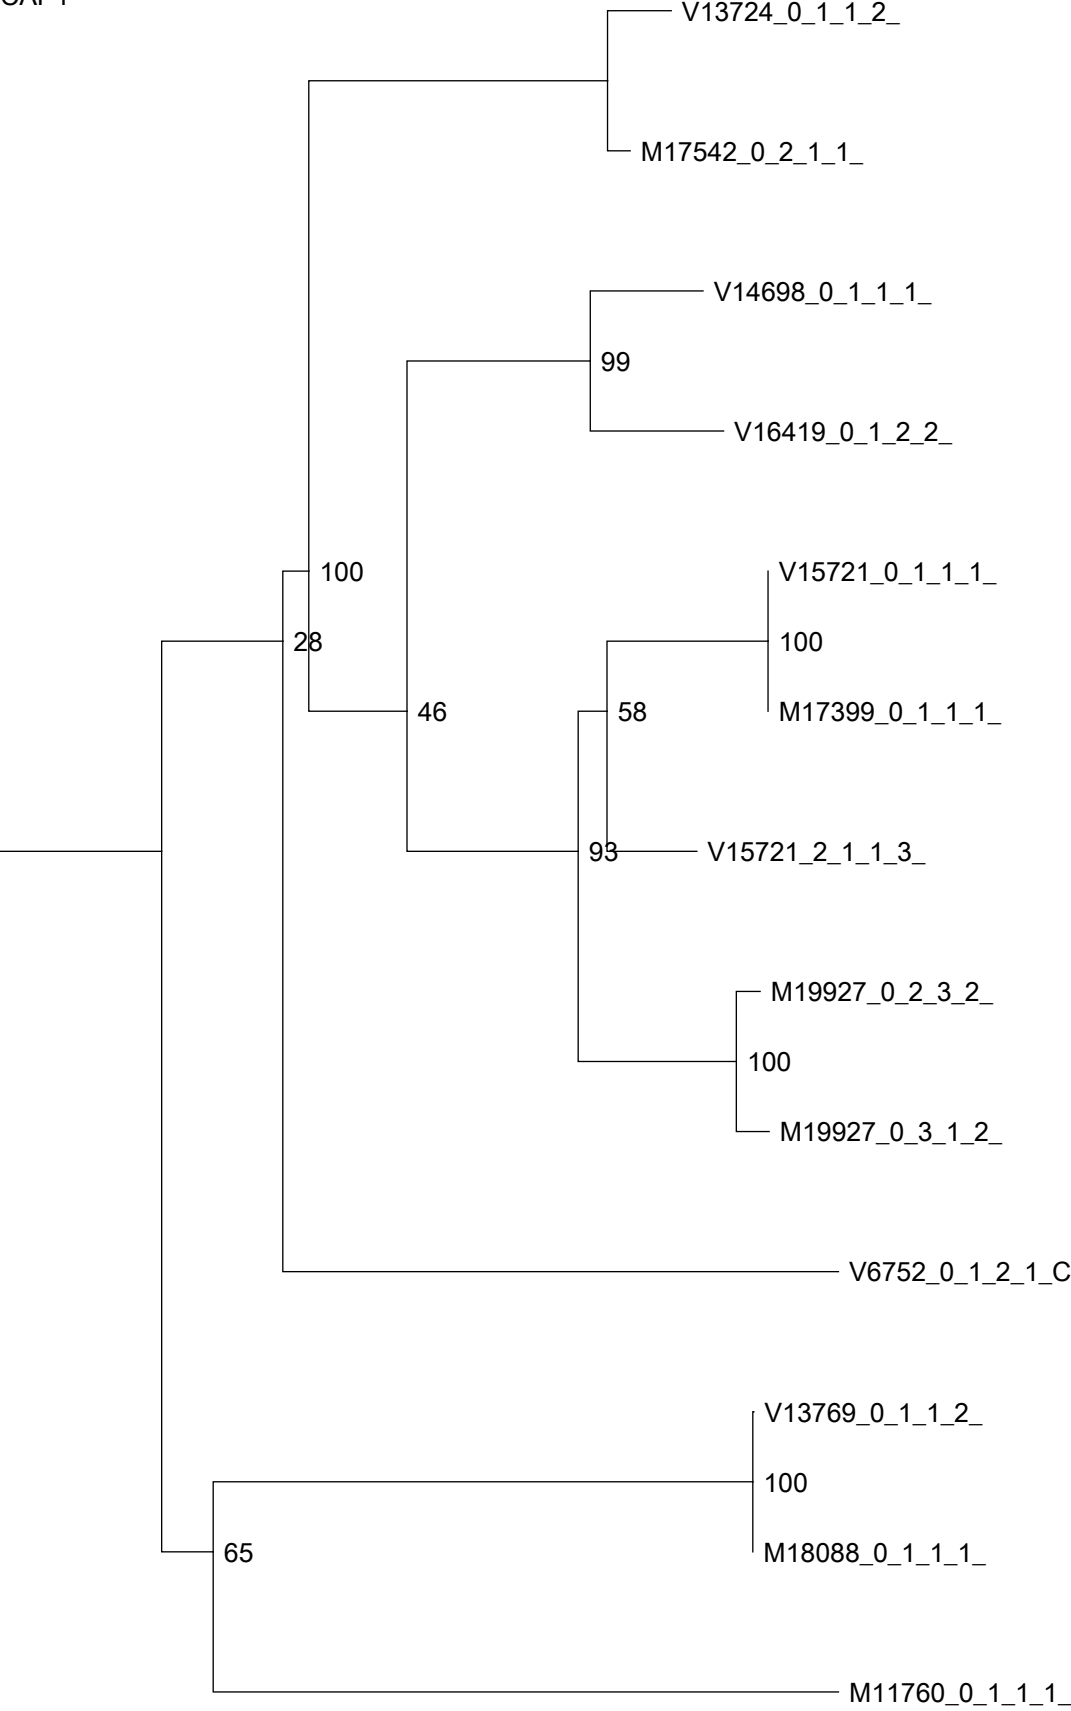

0.1

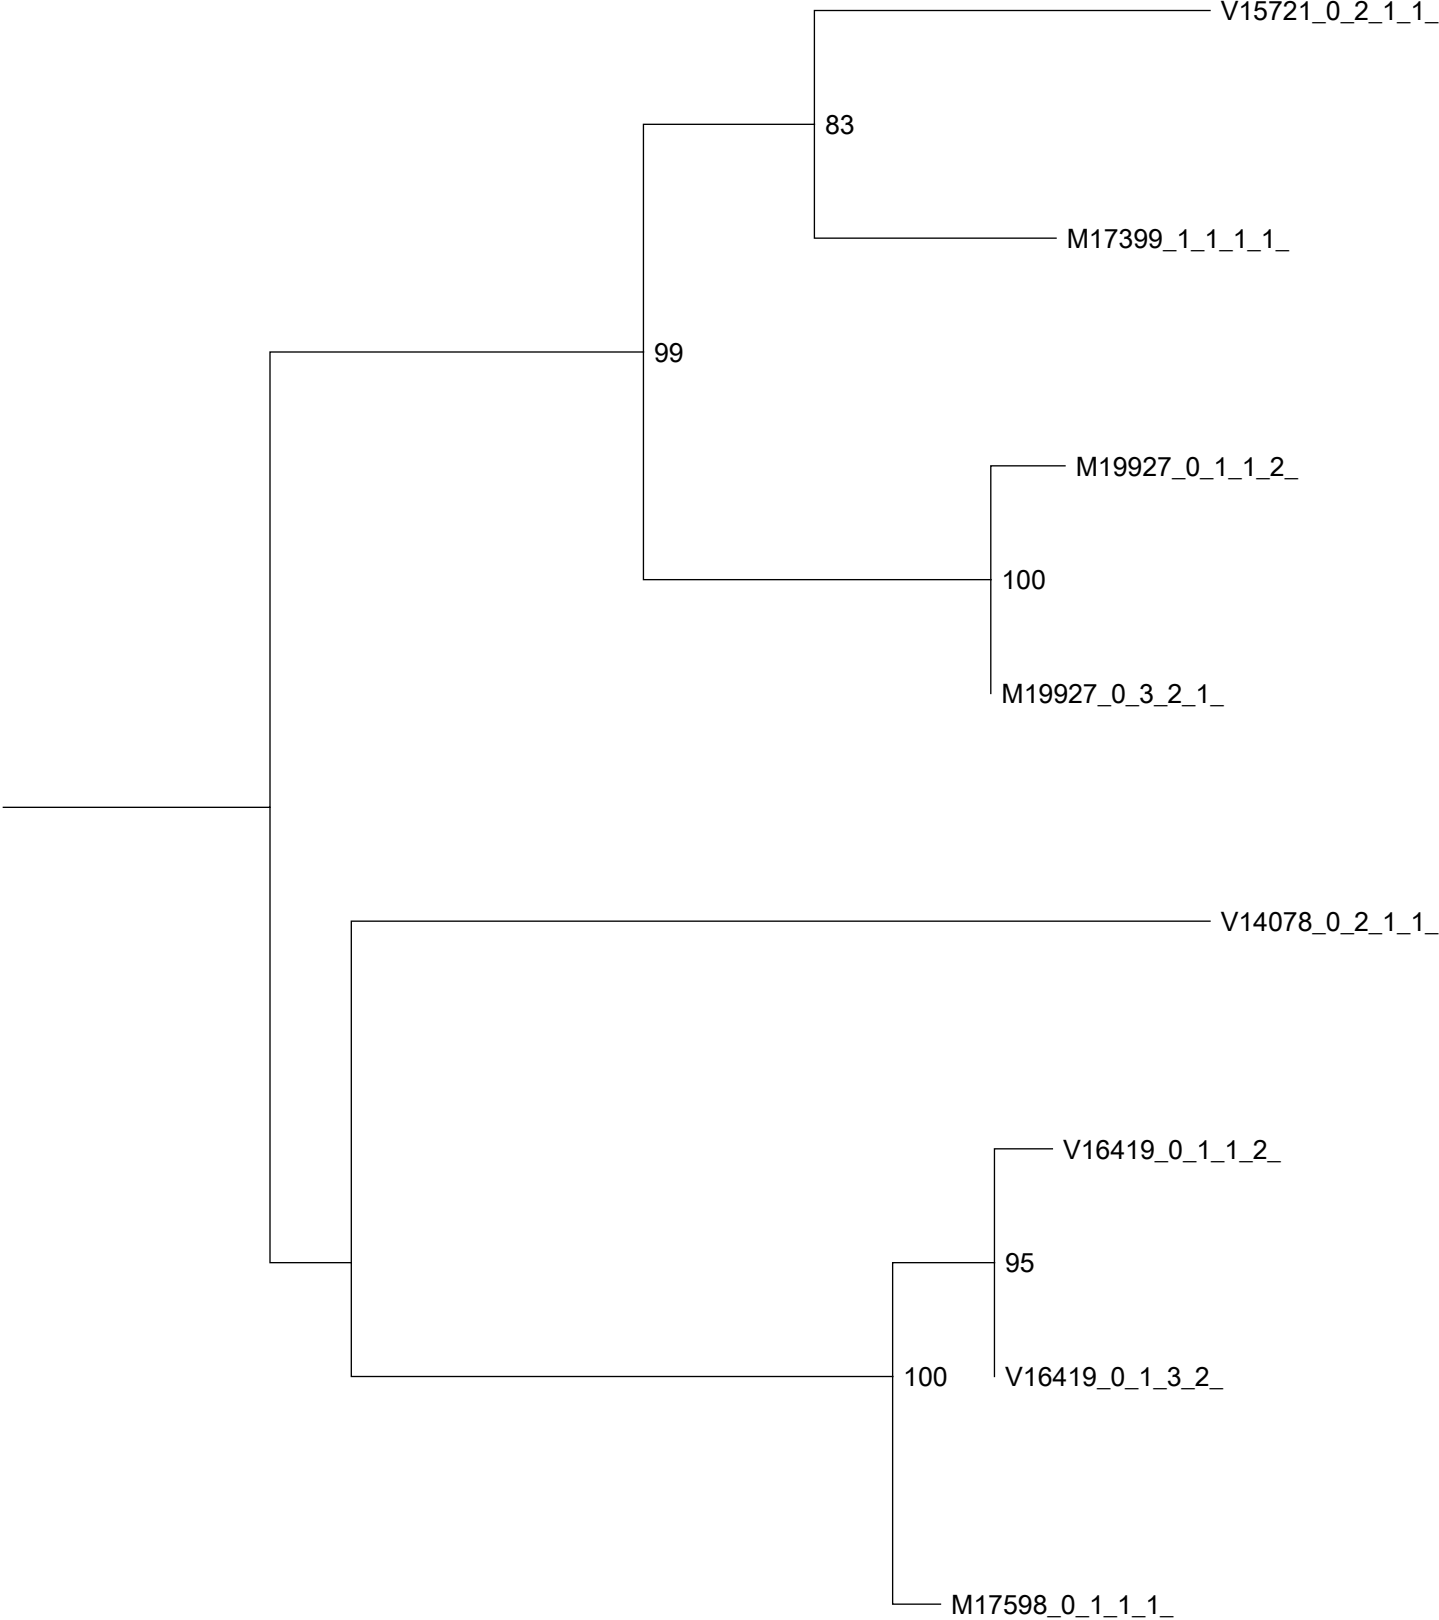

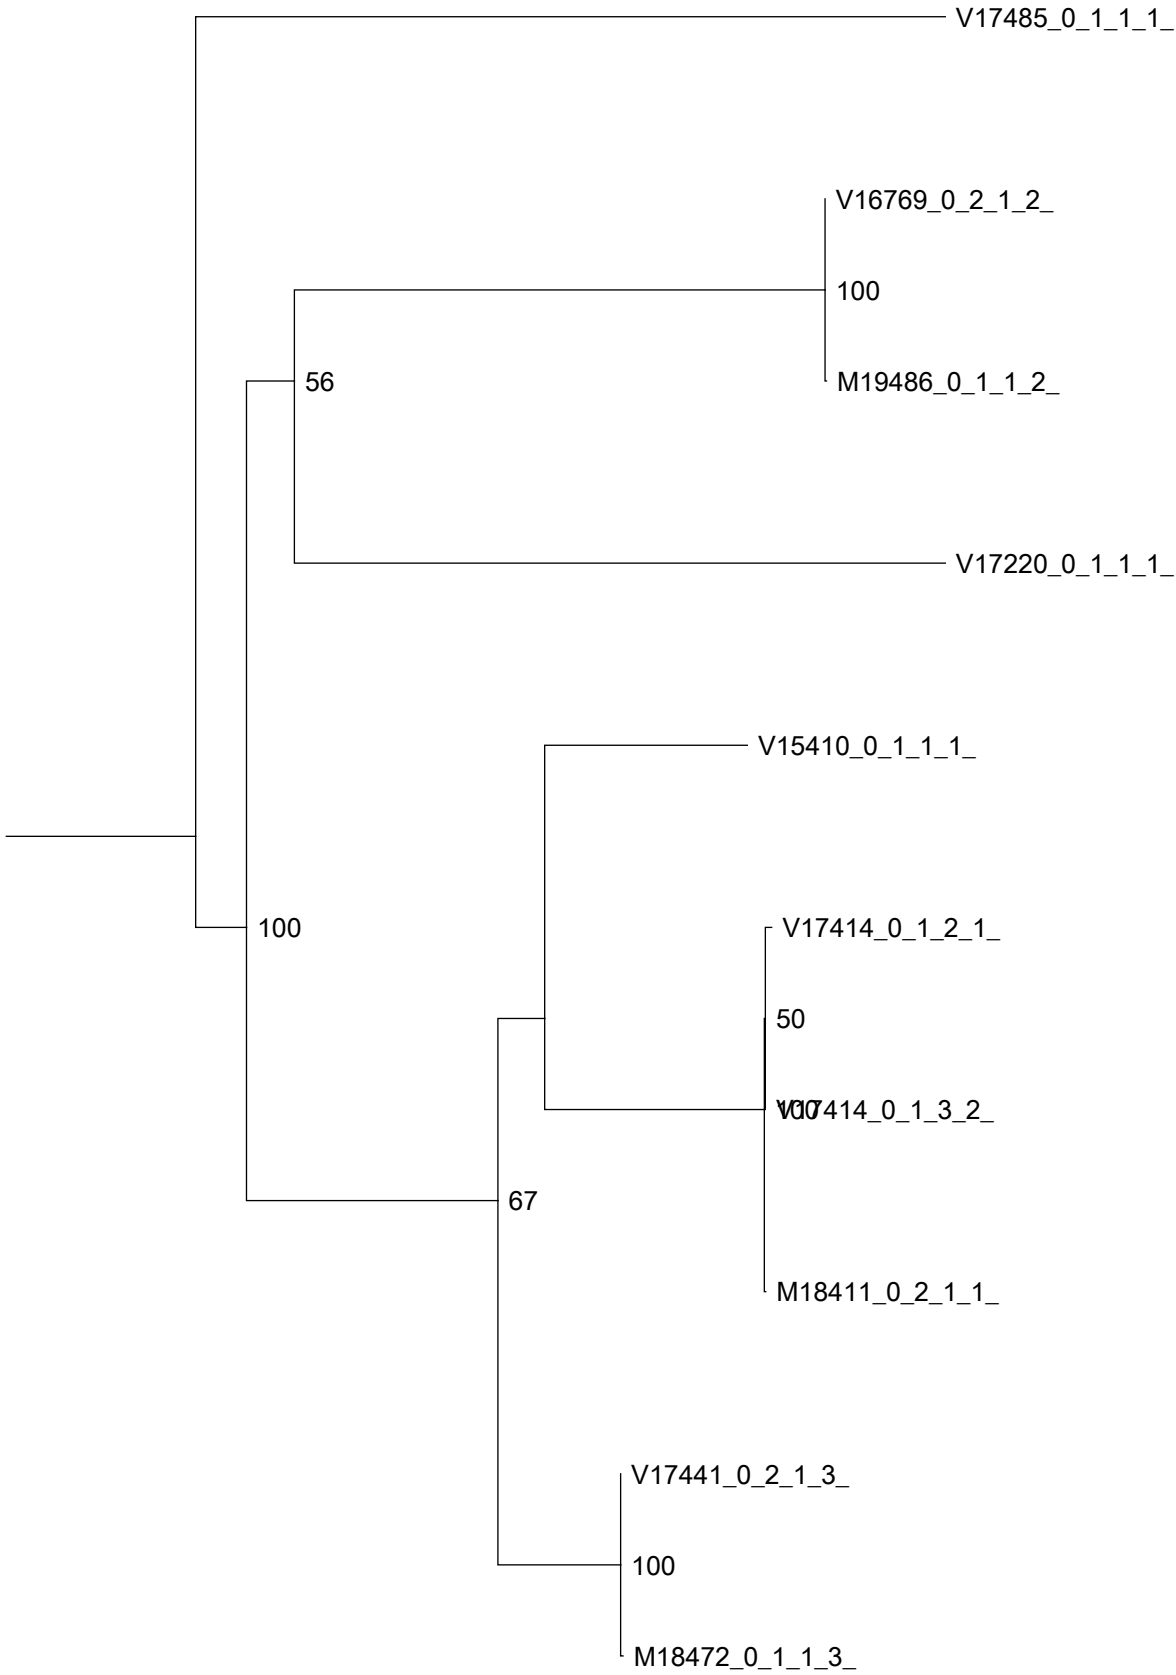

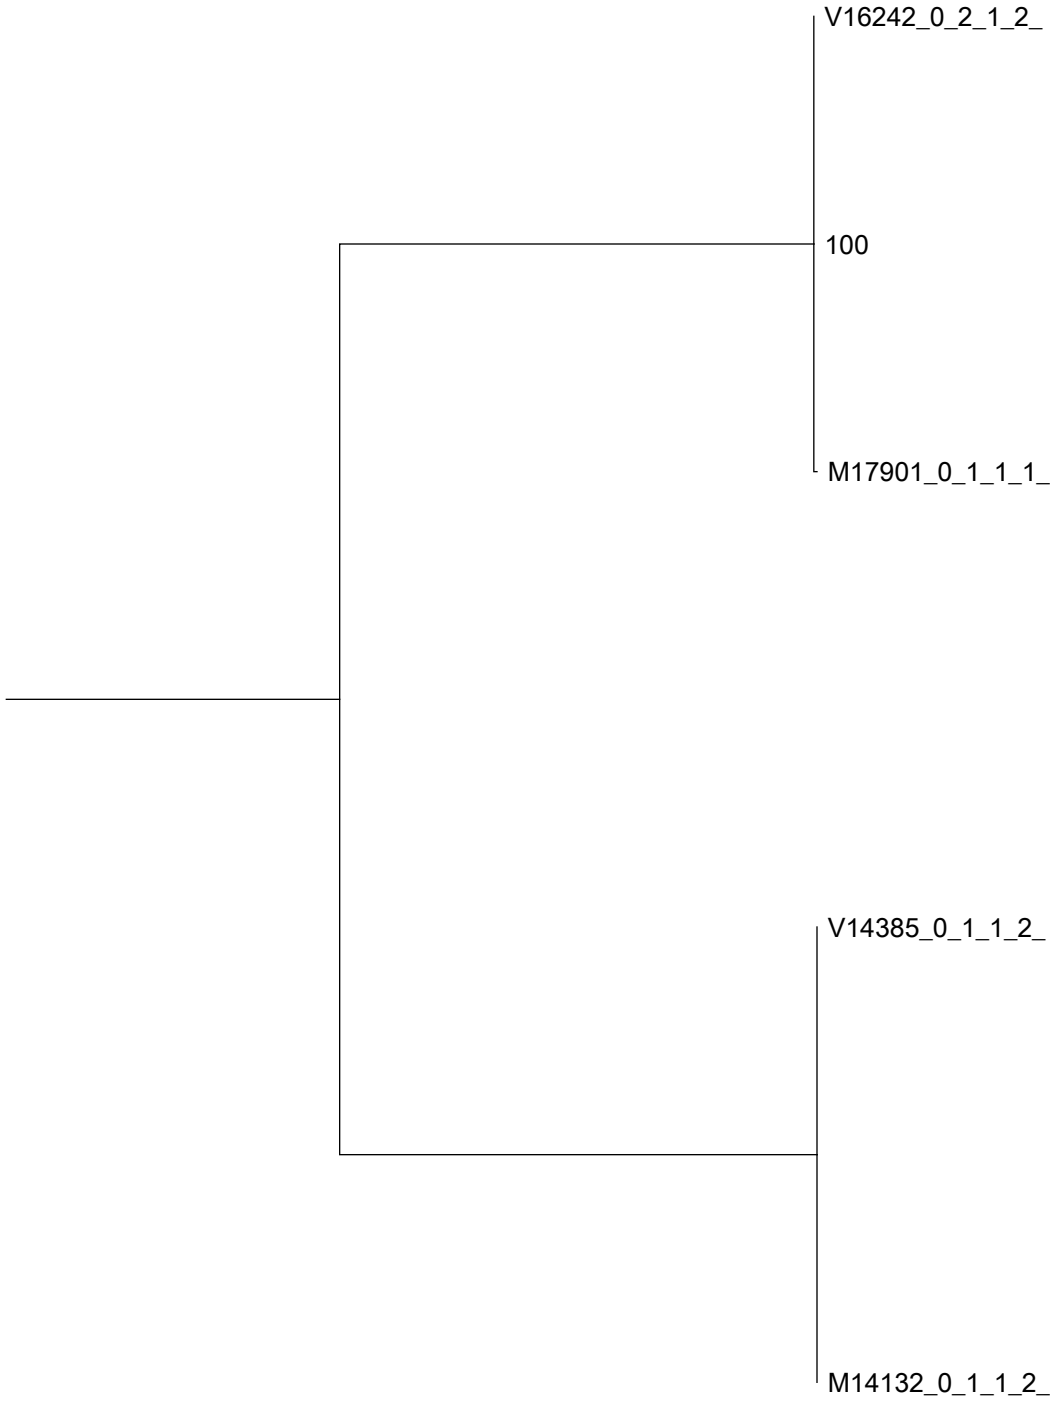

GDH

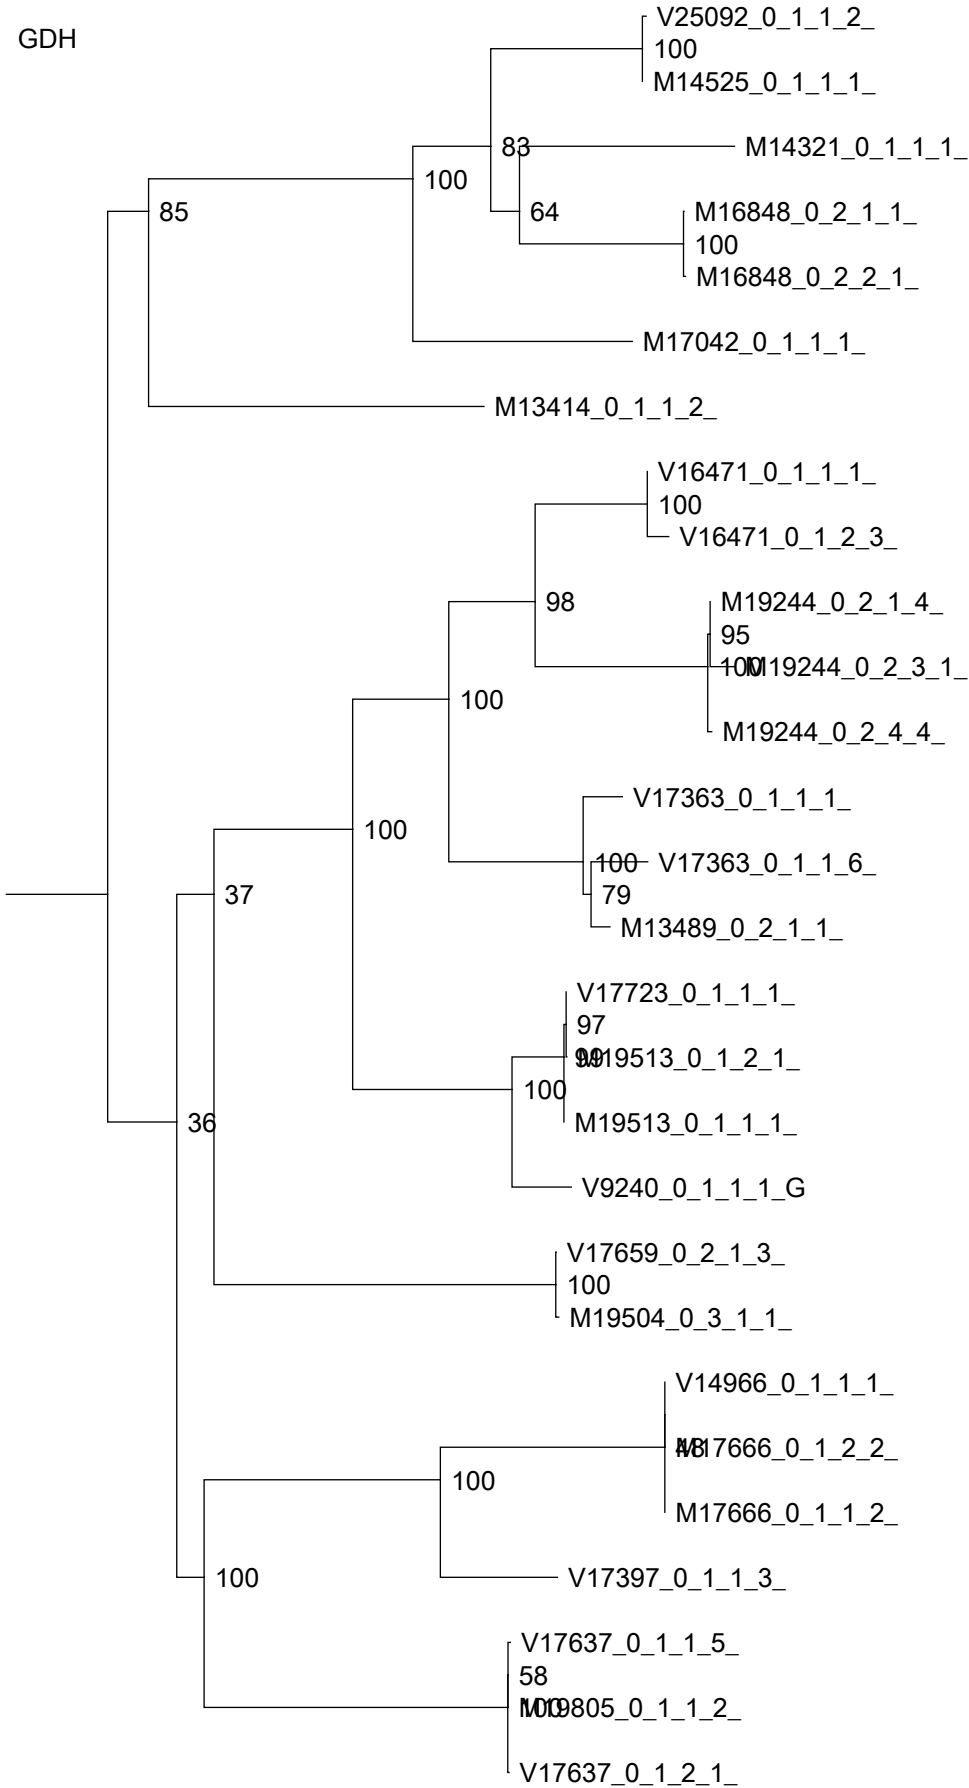

0.1

LDLA

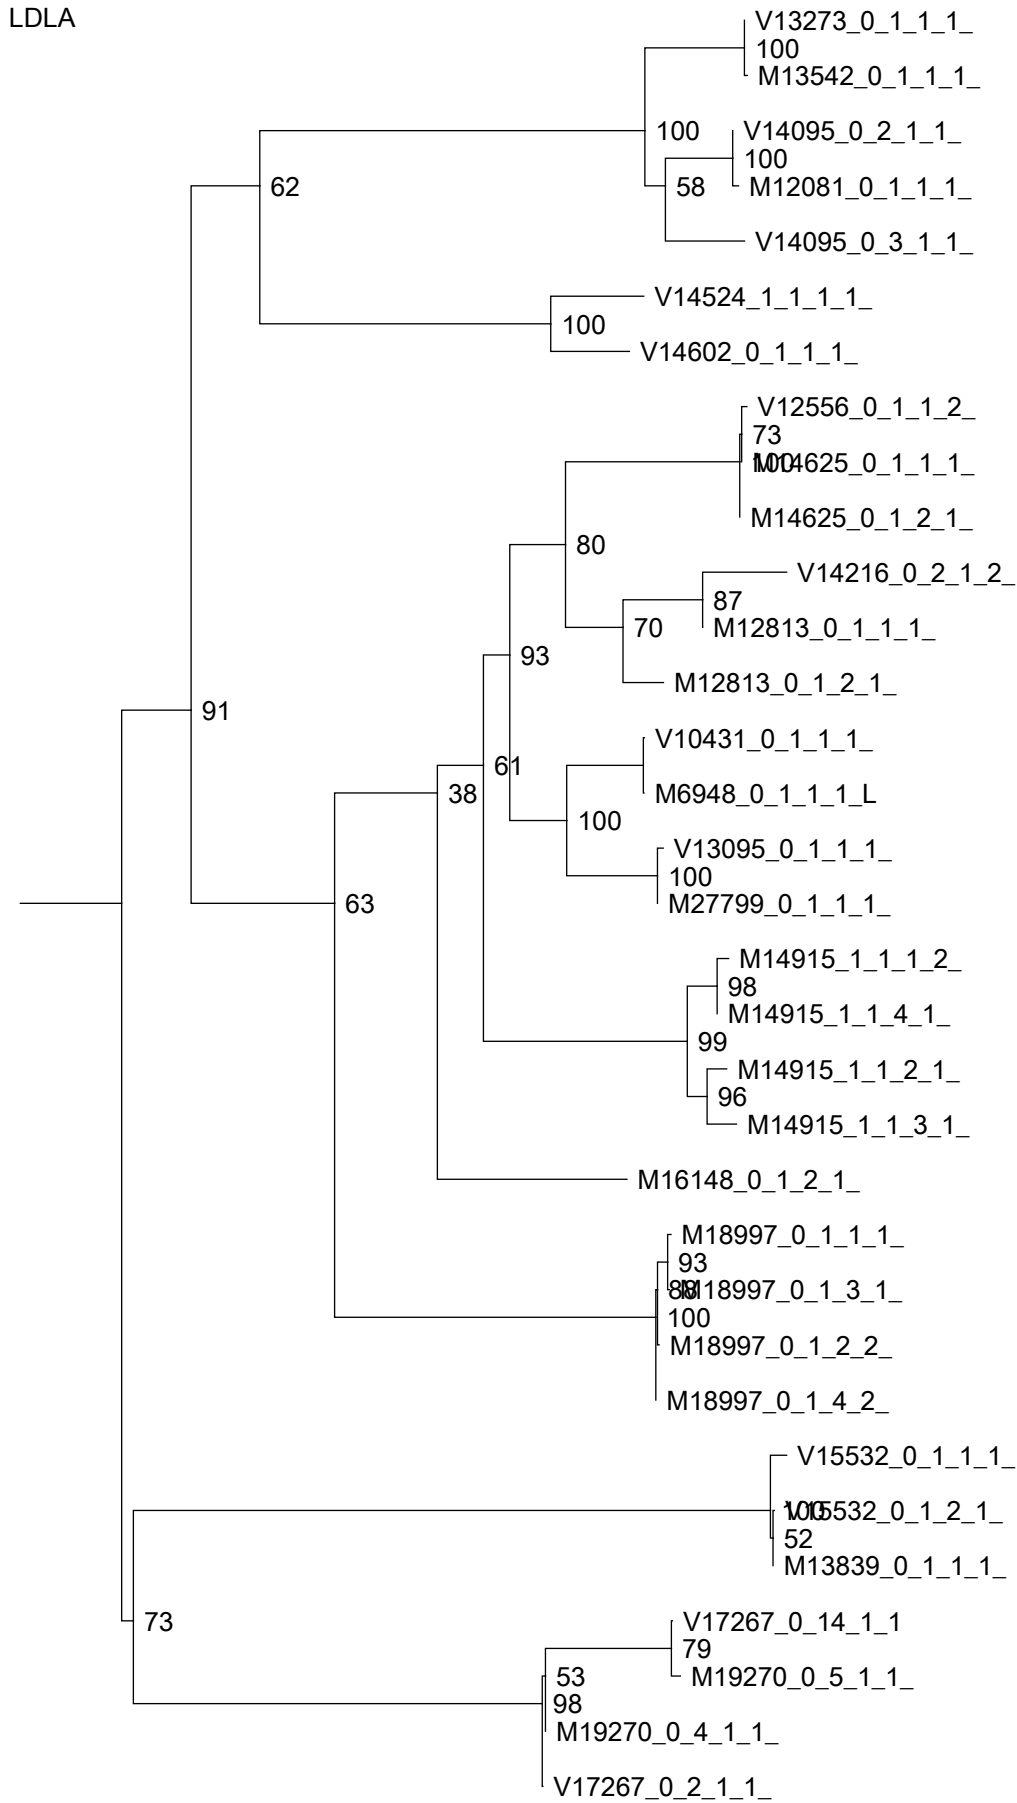

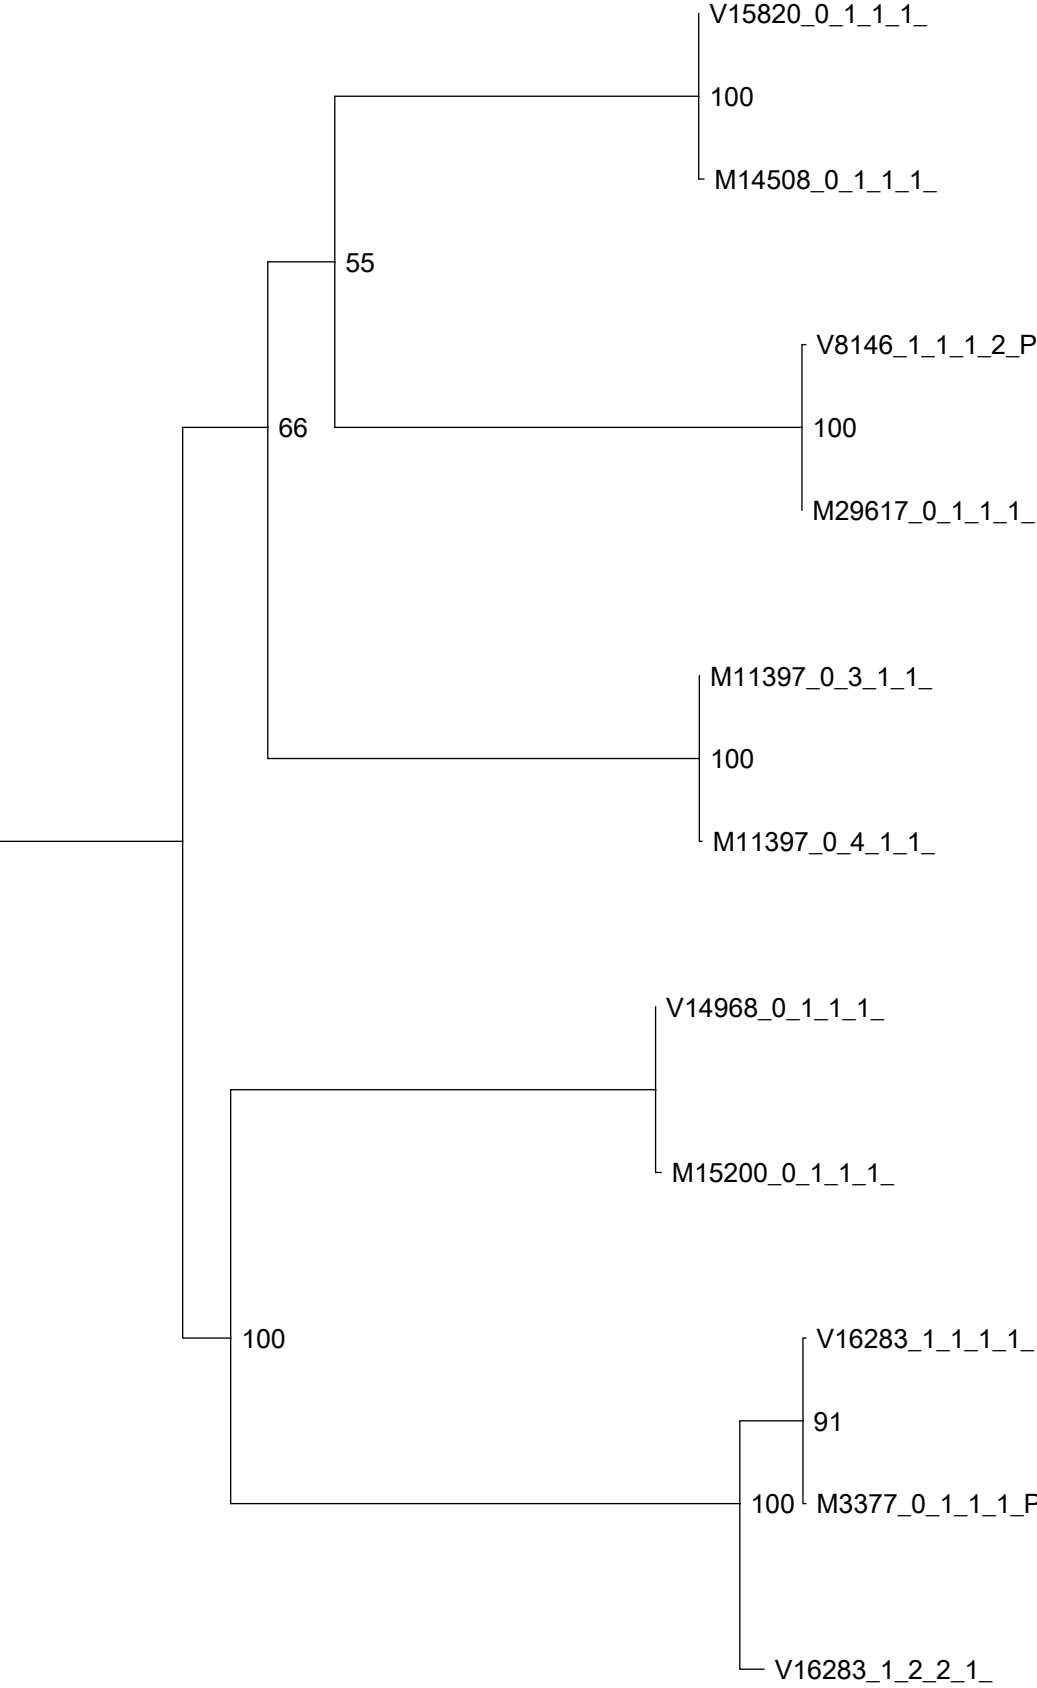



pM12A

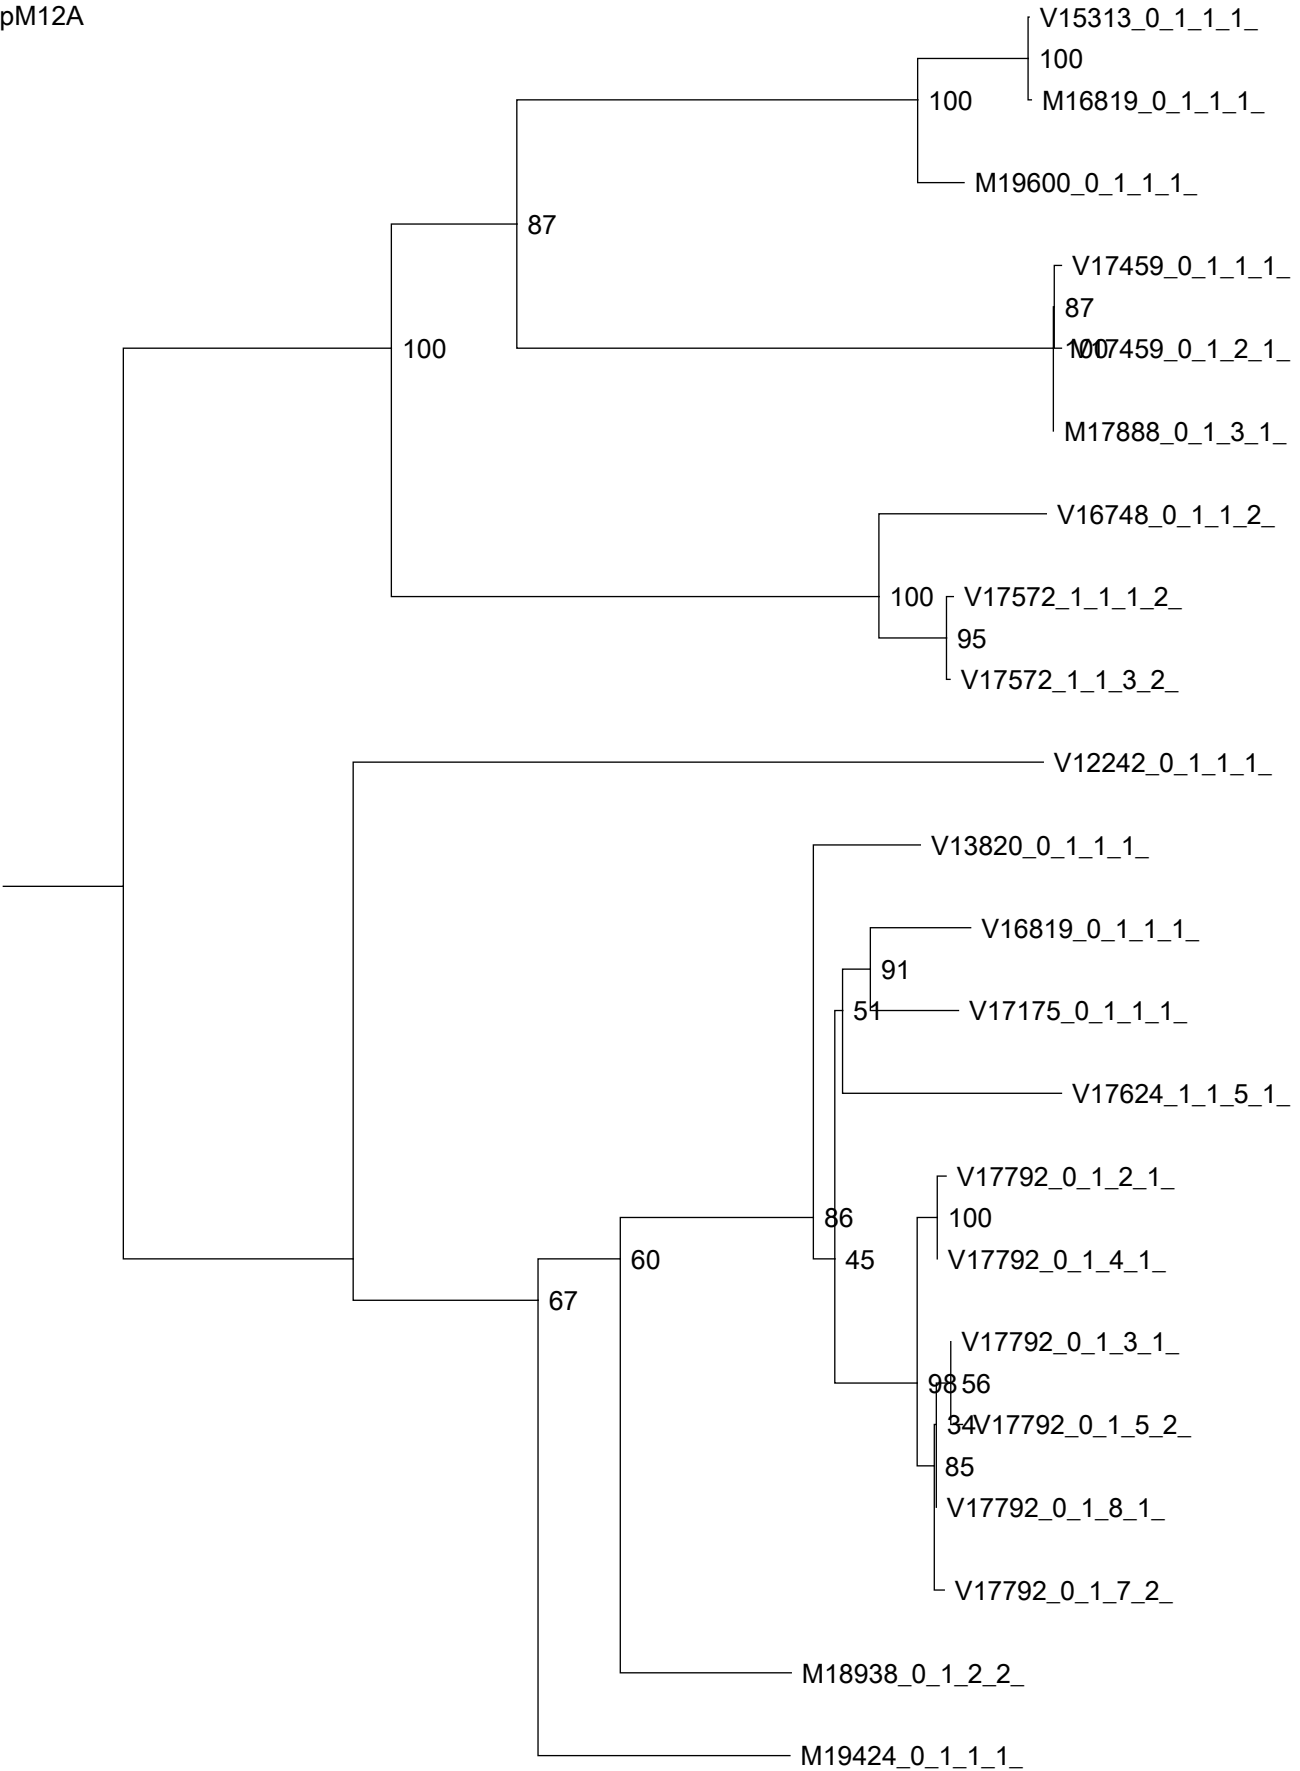

0.1

S1

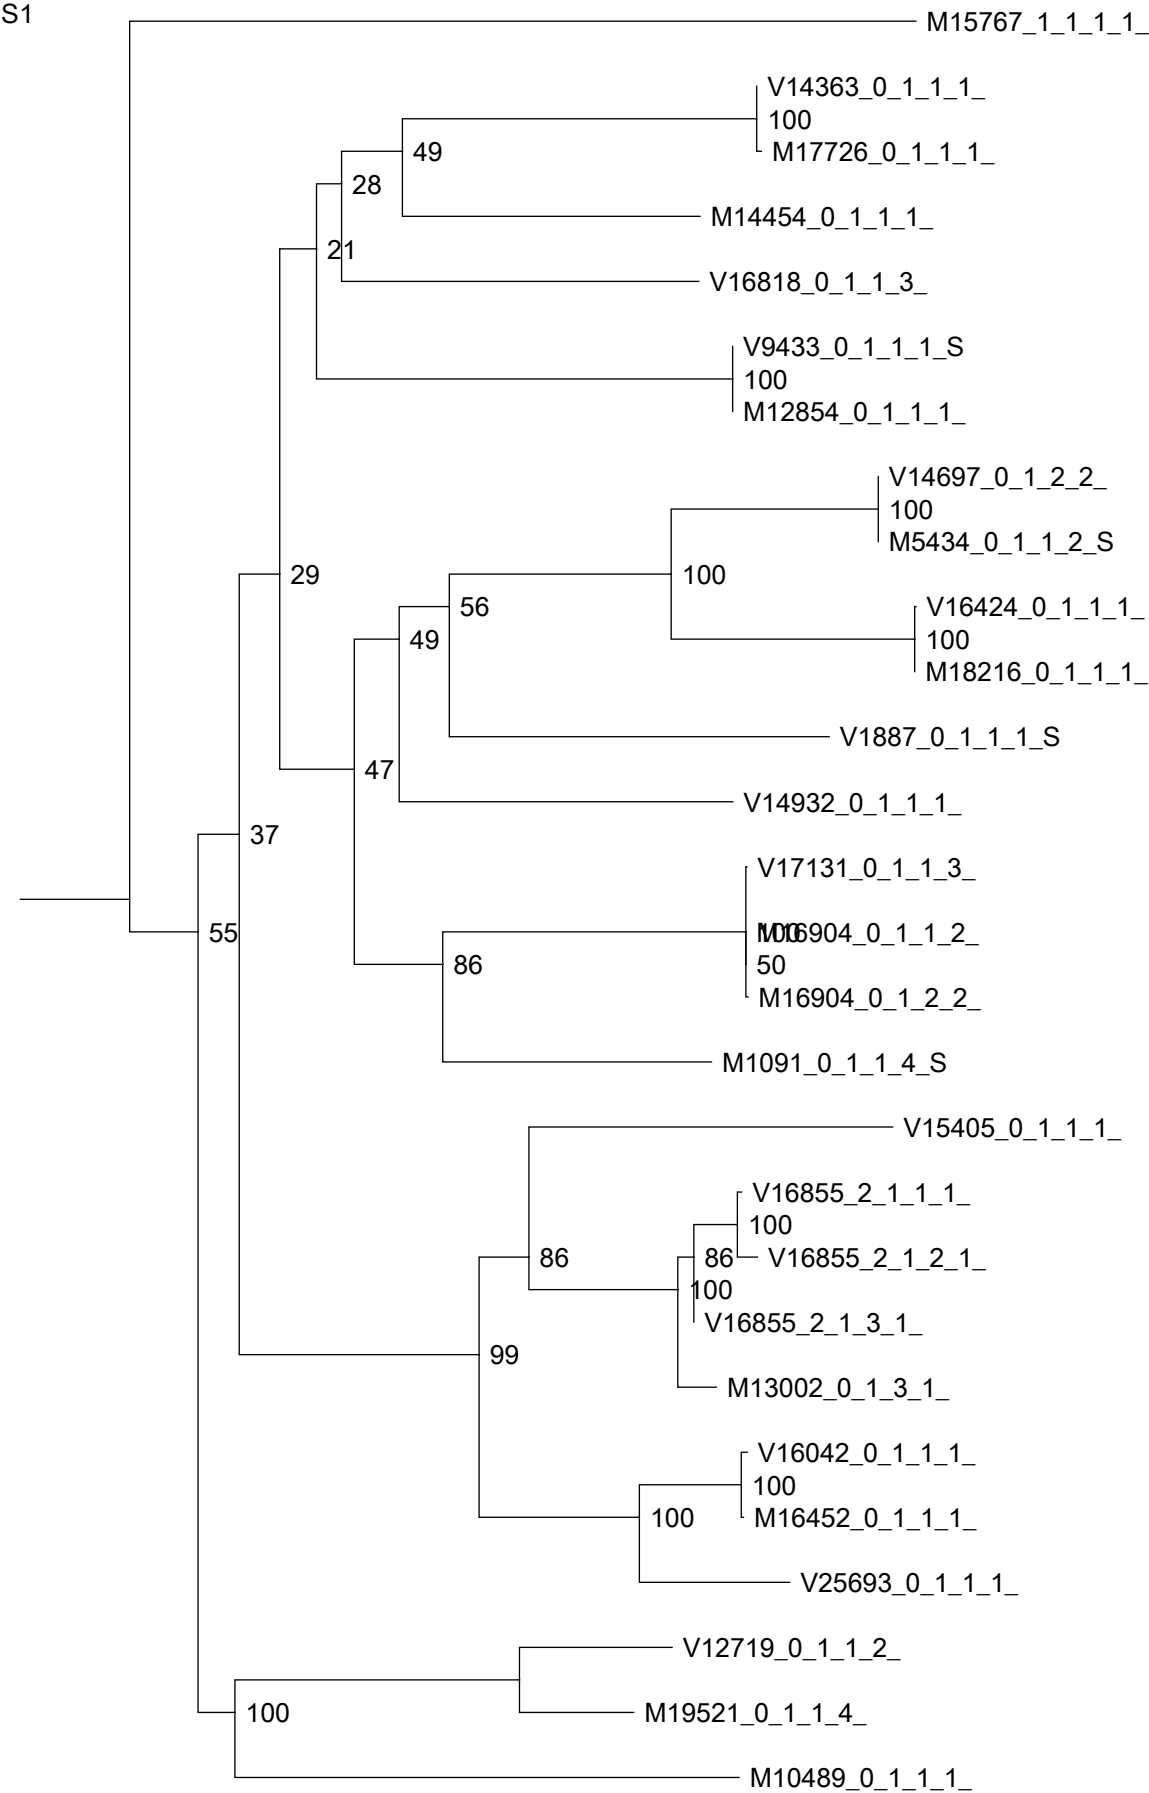

0.1

SLPTX01

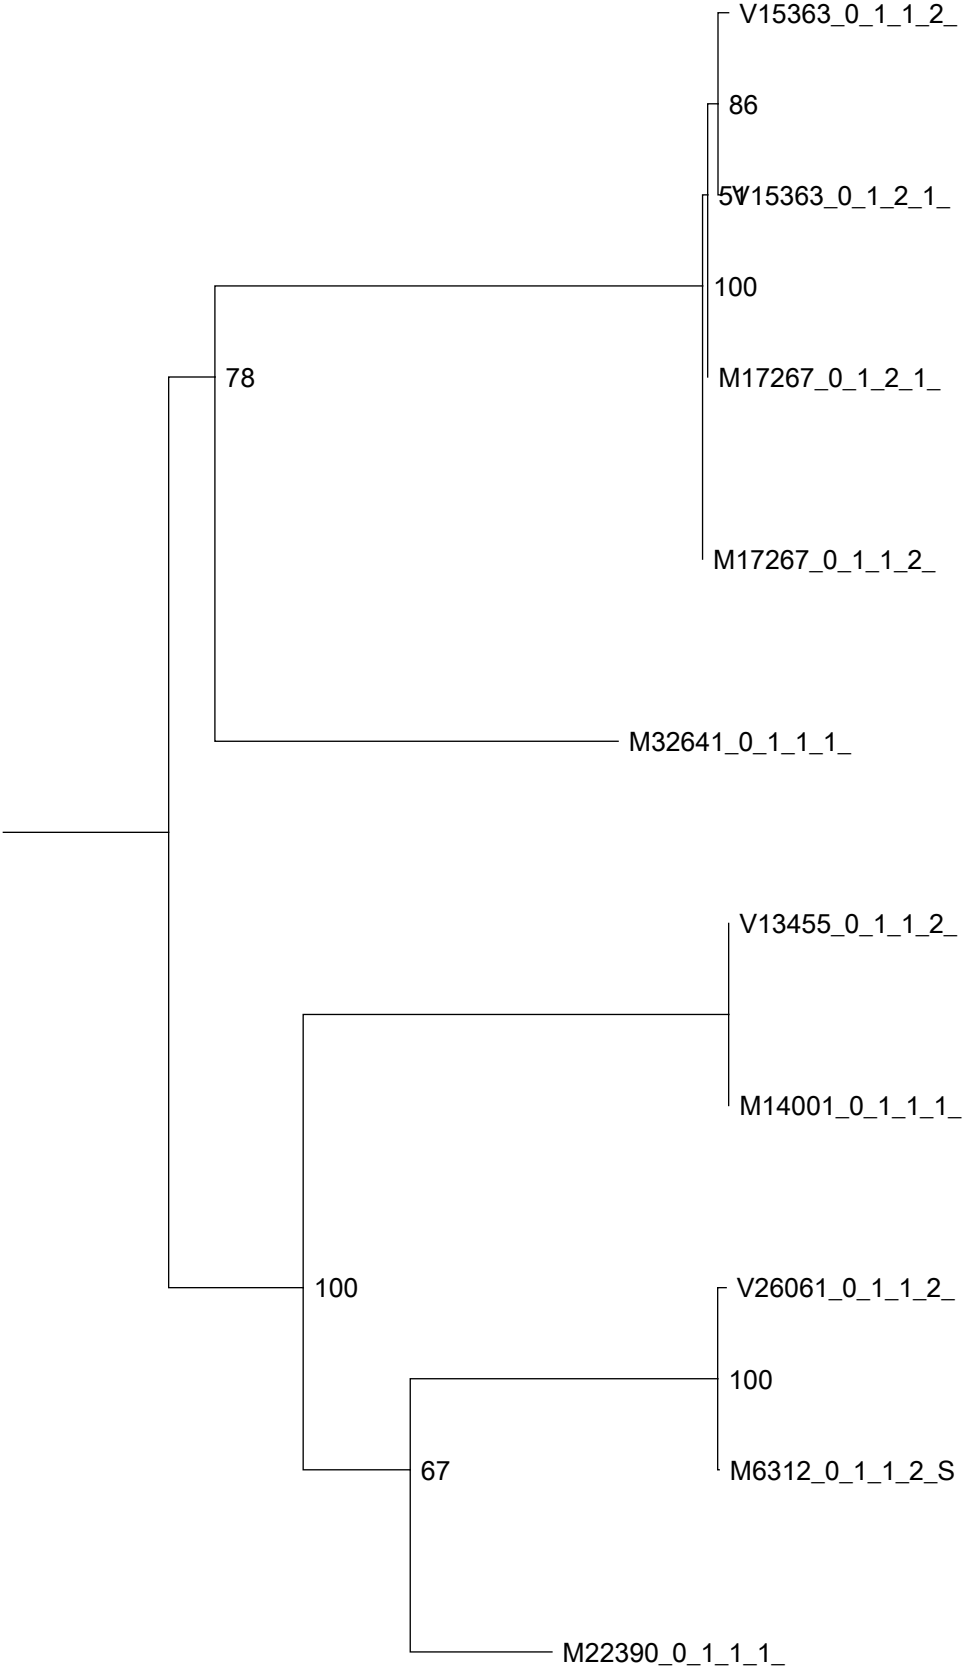

0.1

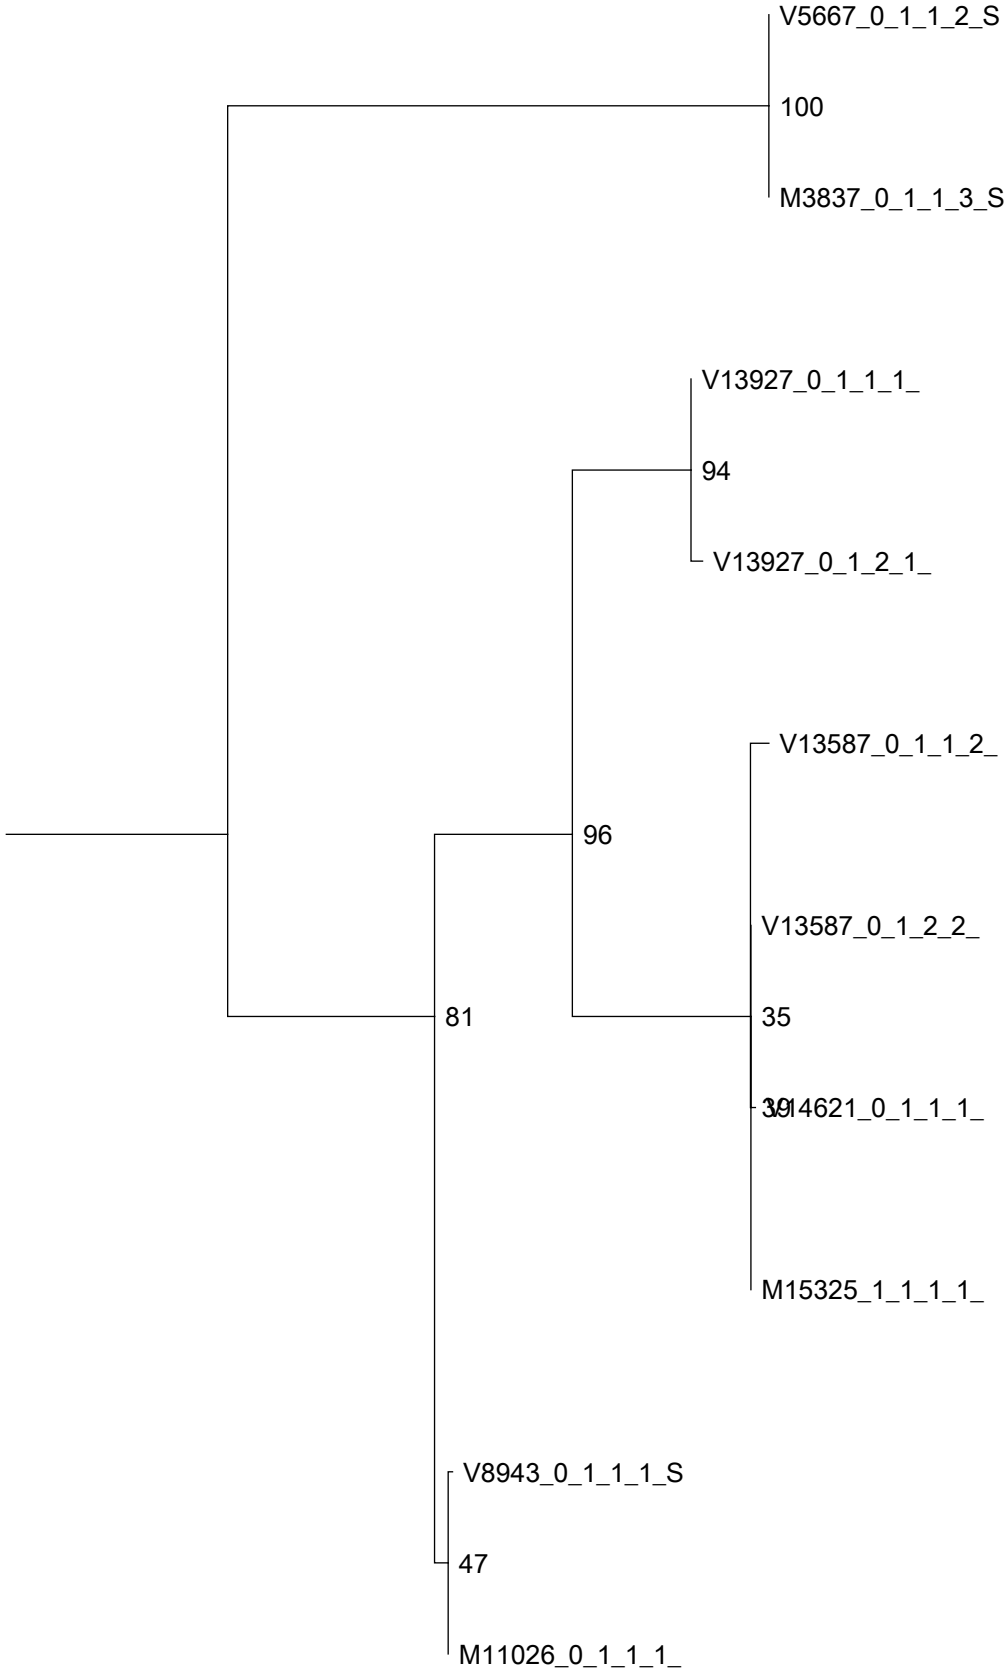

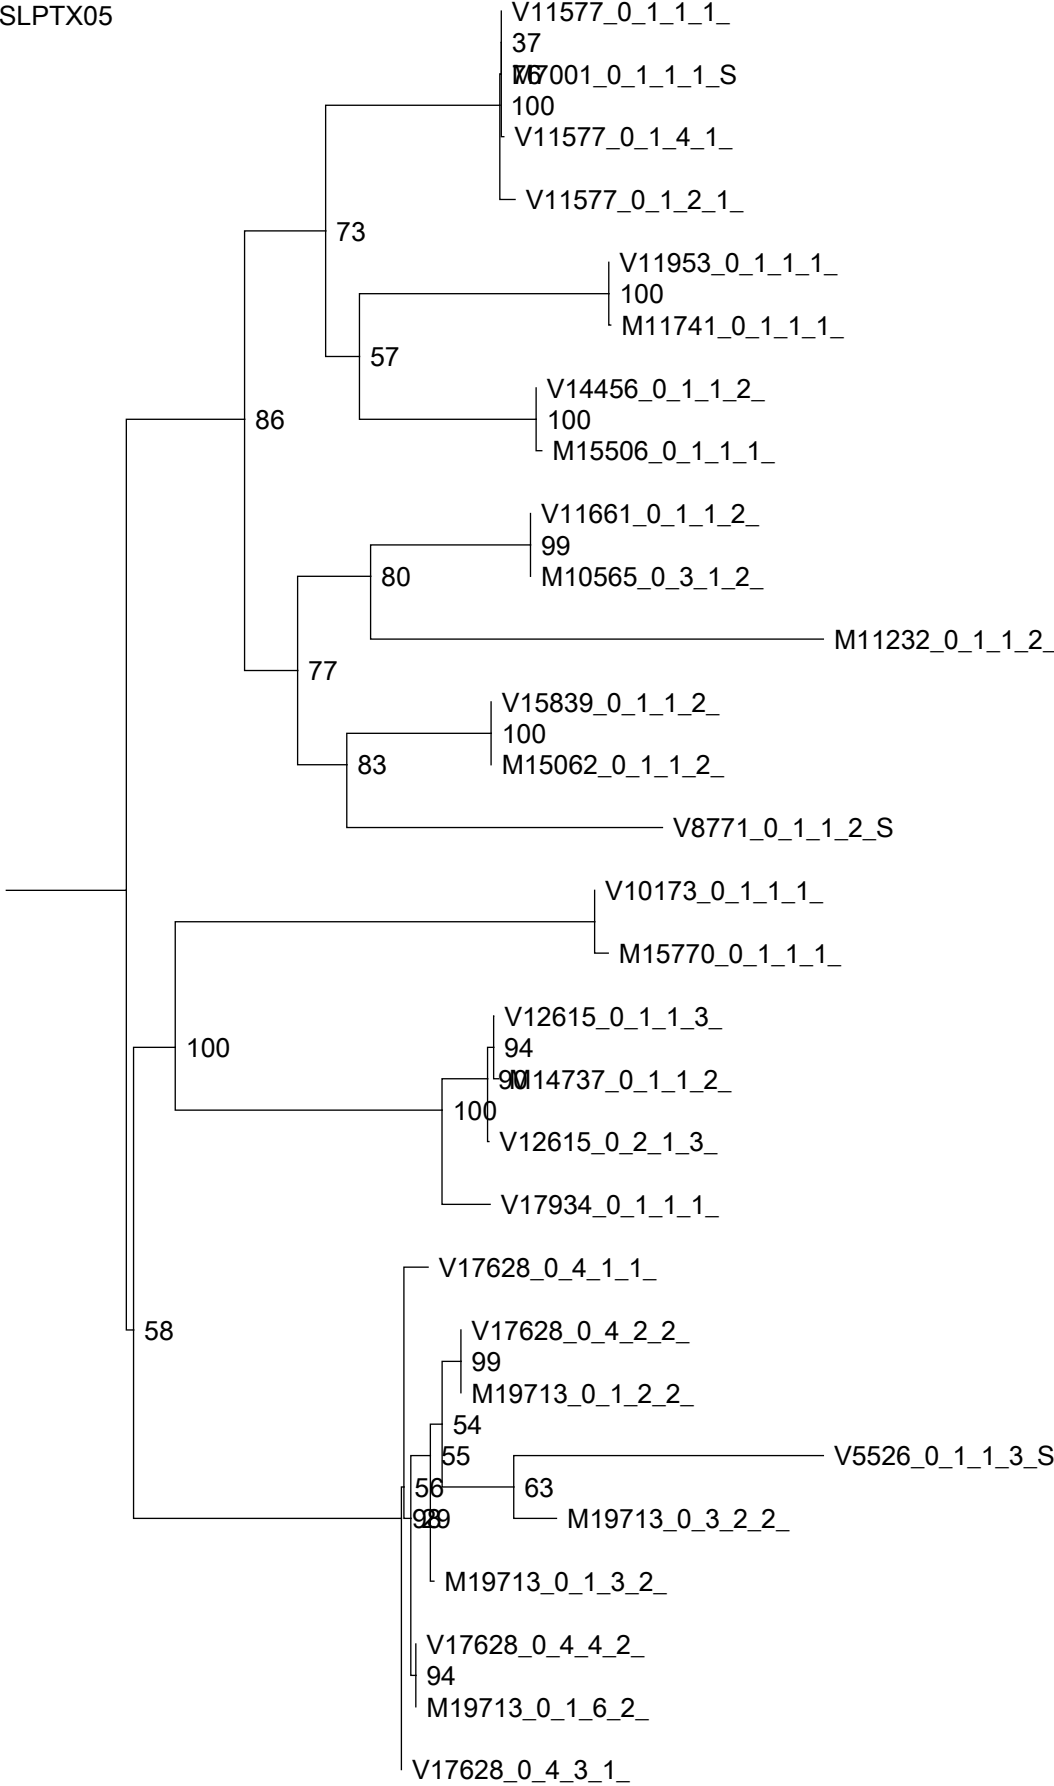

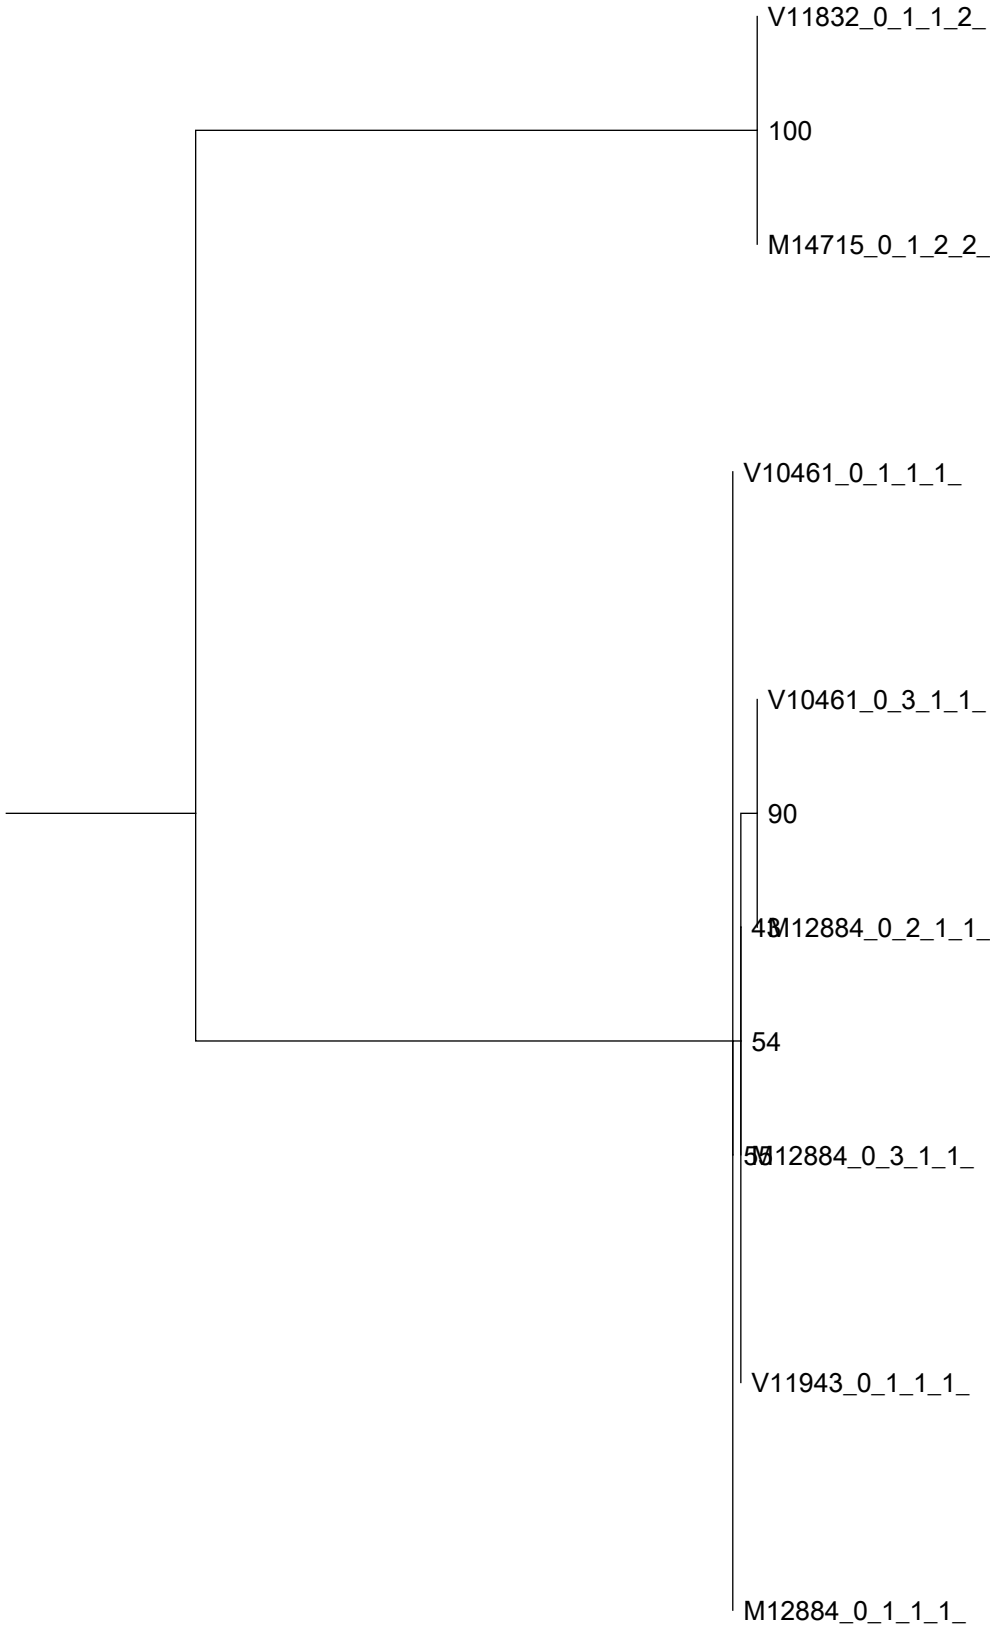

SLPTX10

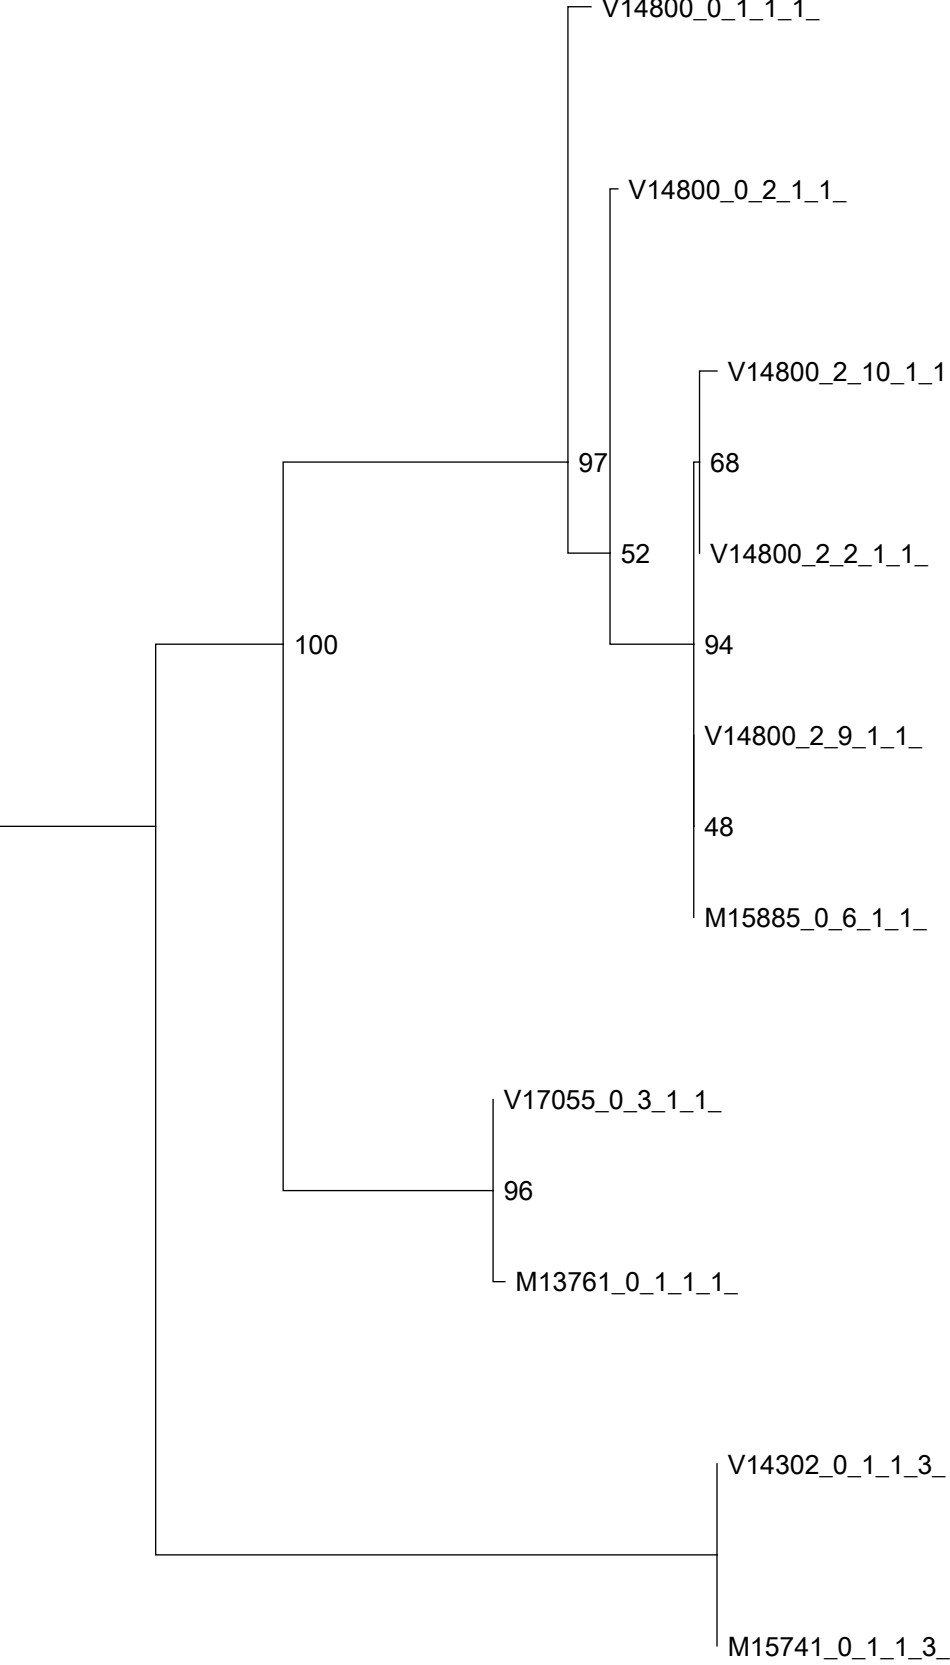

SLPTX11

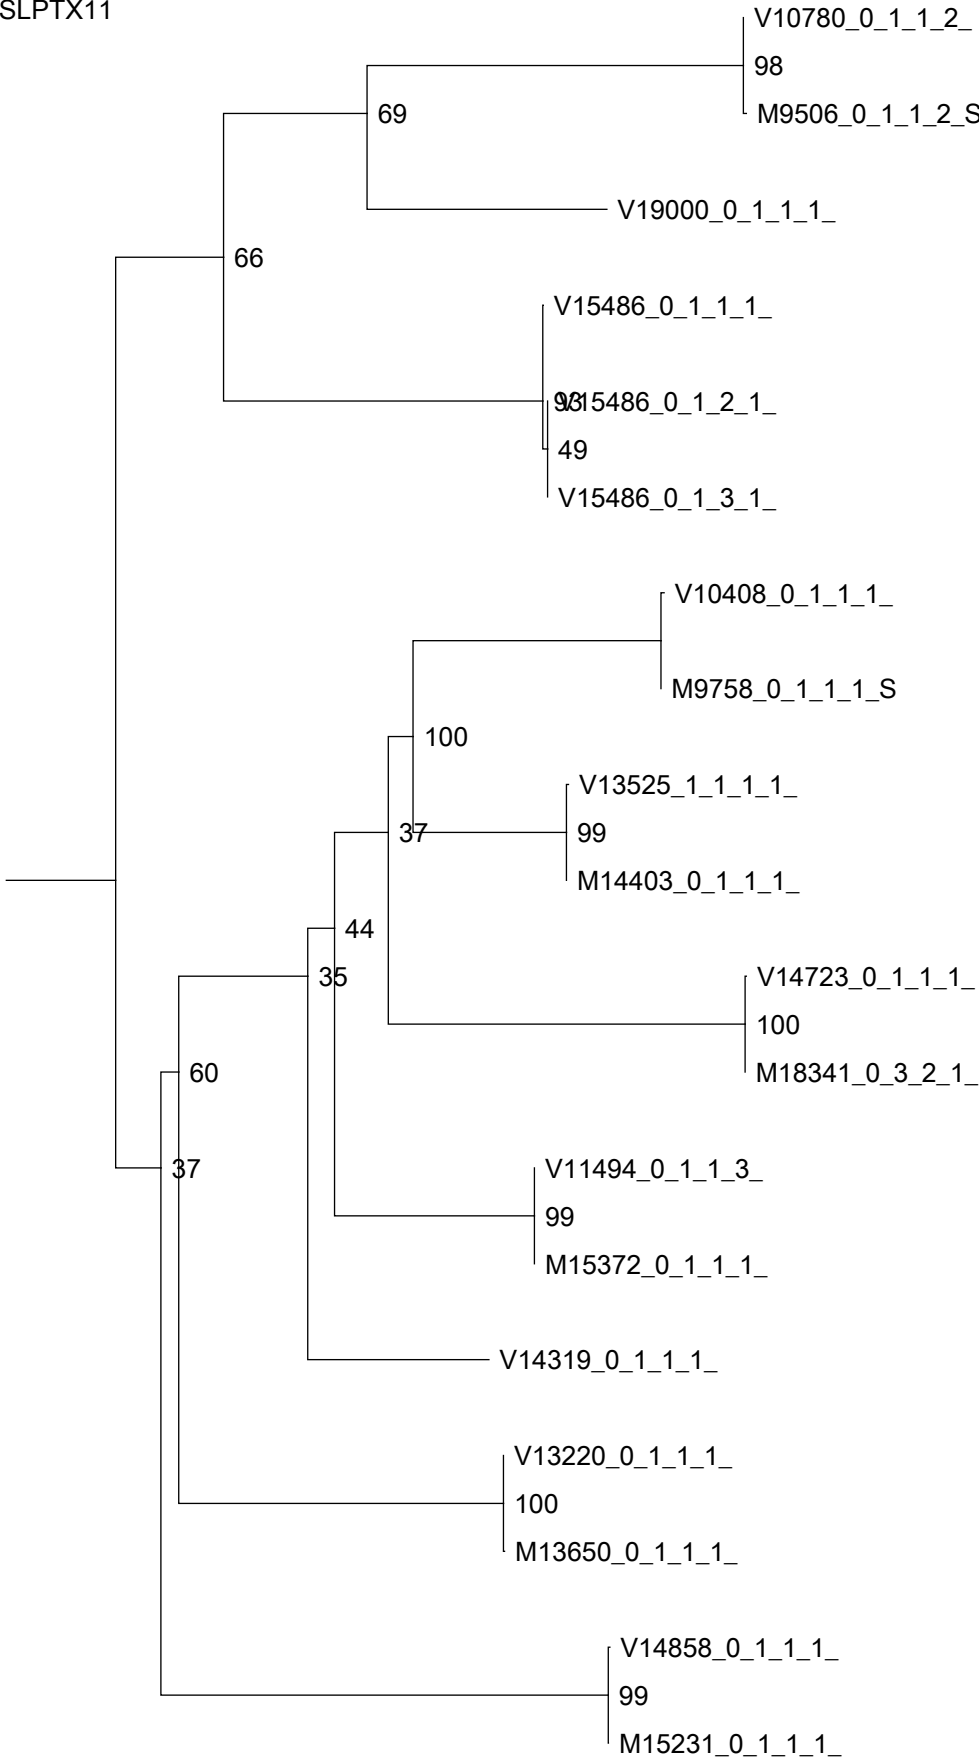

1.0



SLPTX12

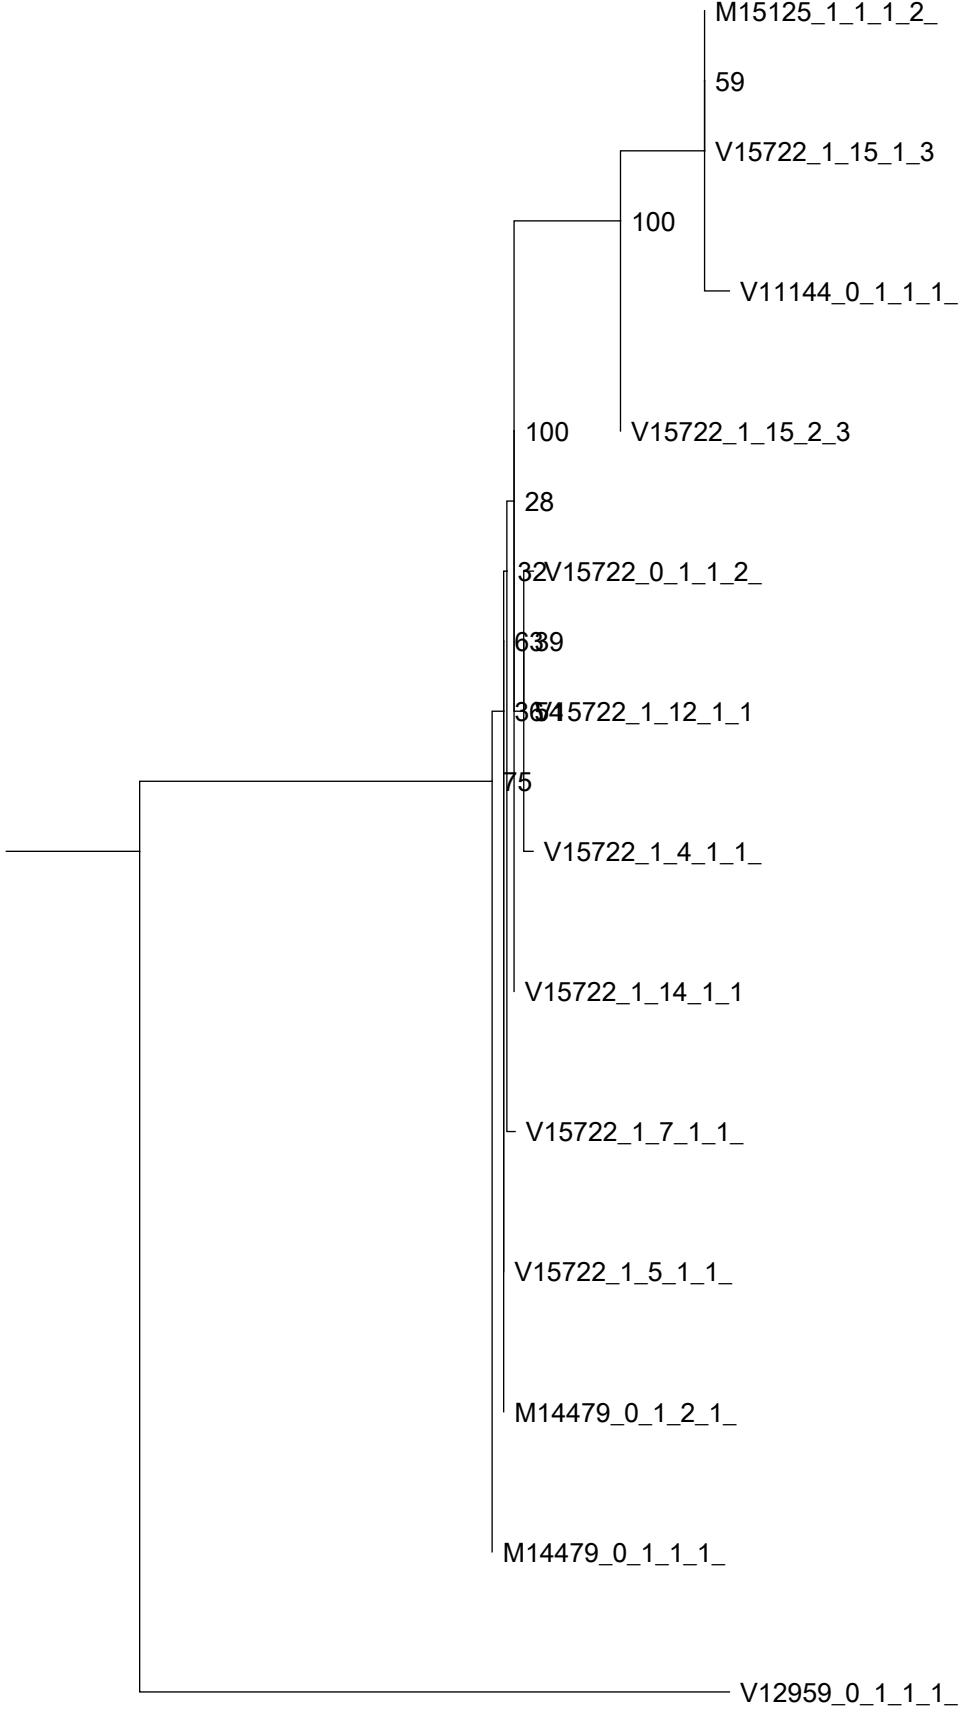

SLPTX14

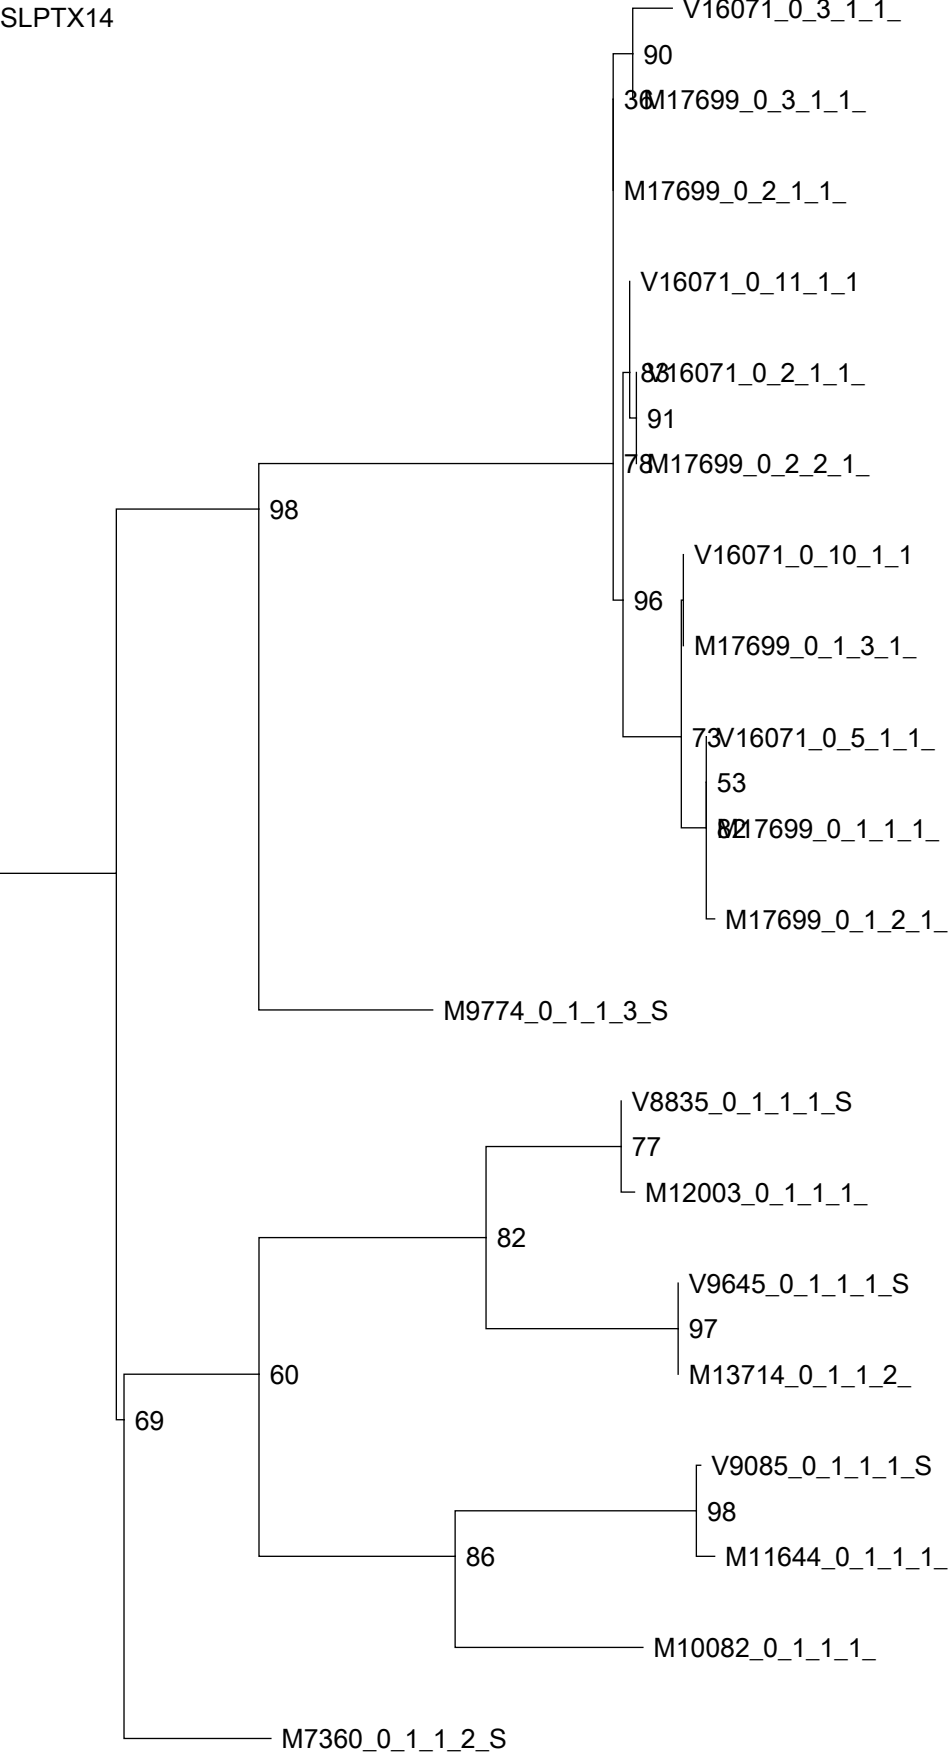

0.1

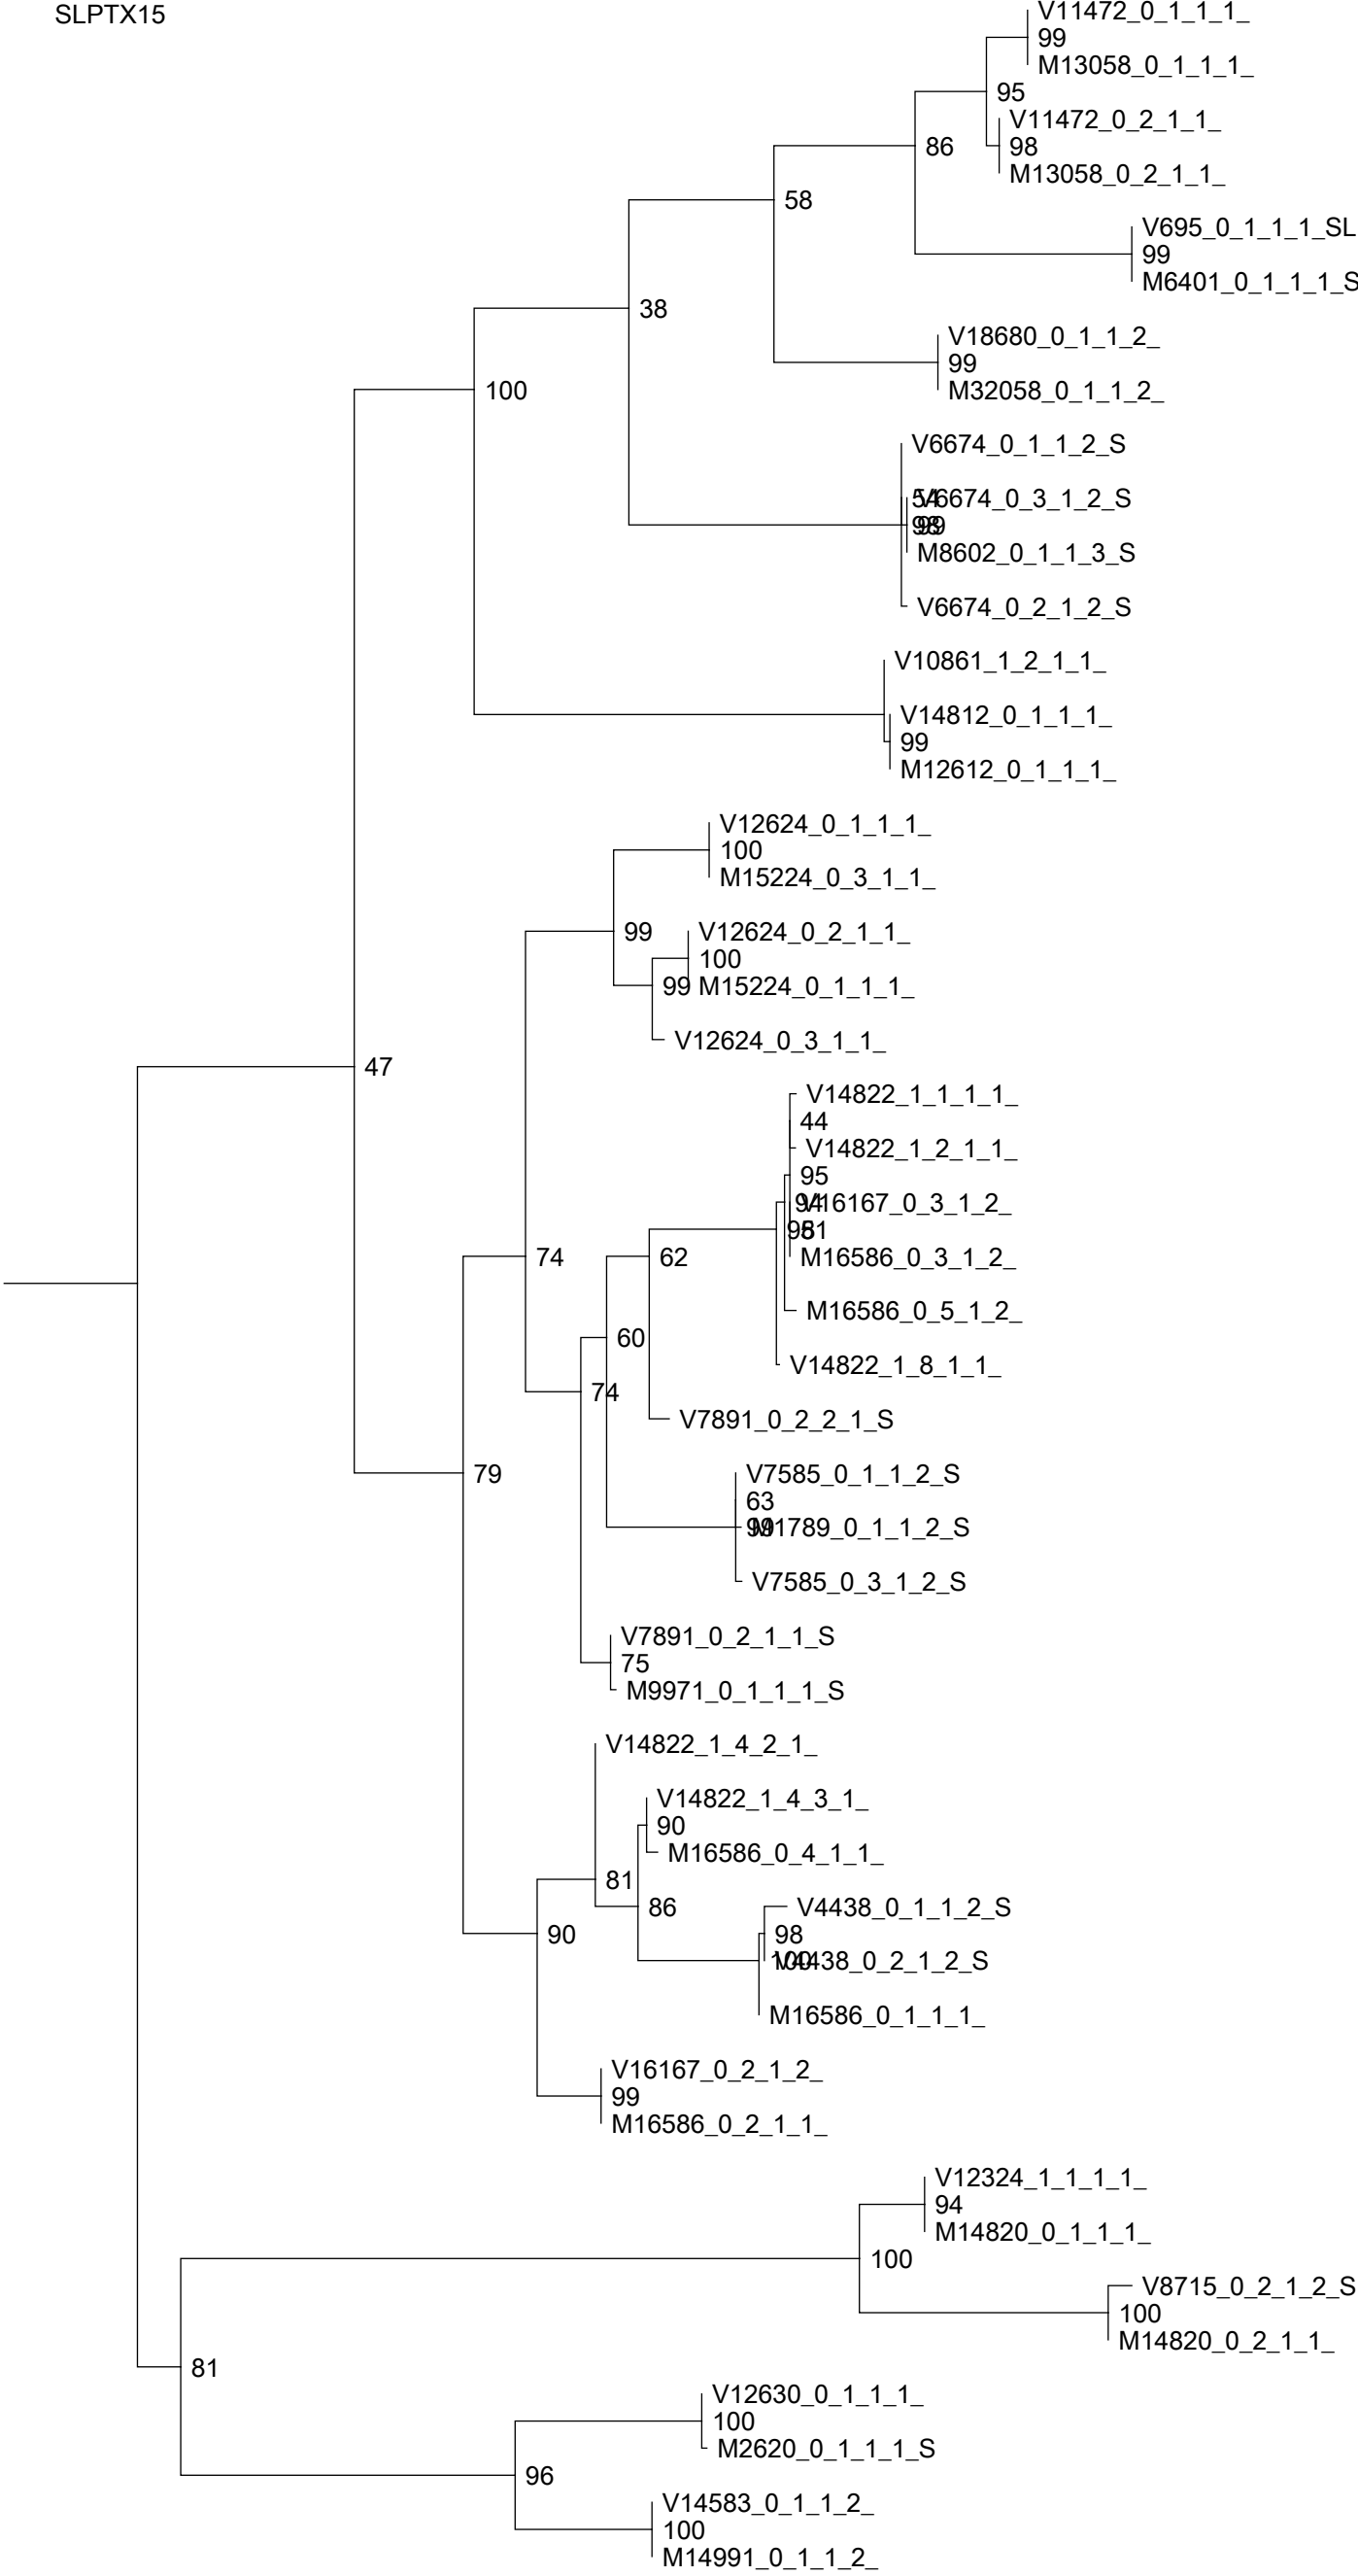

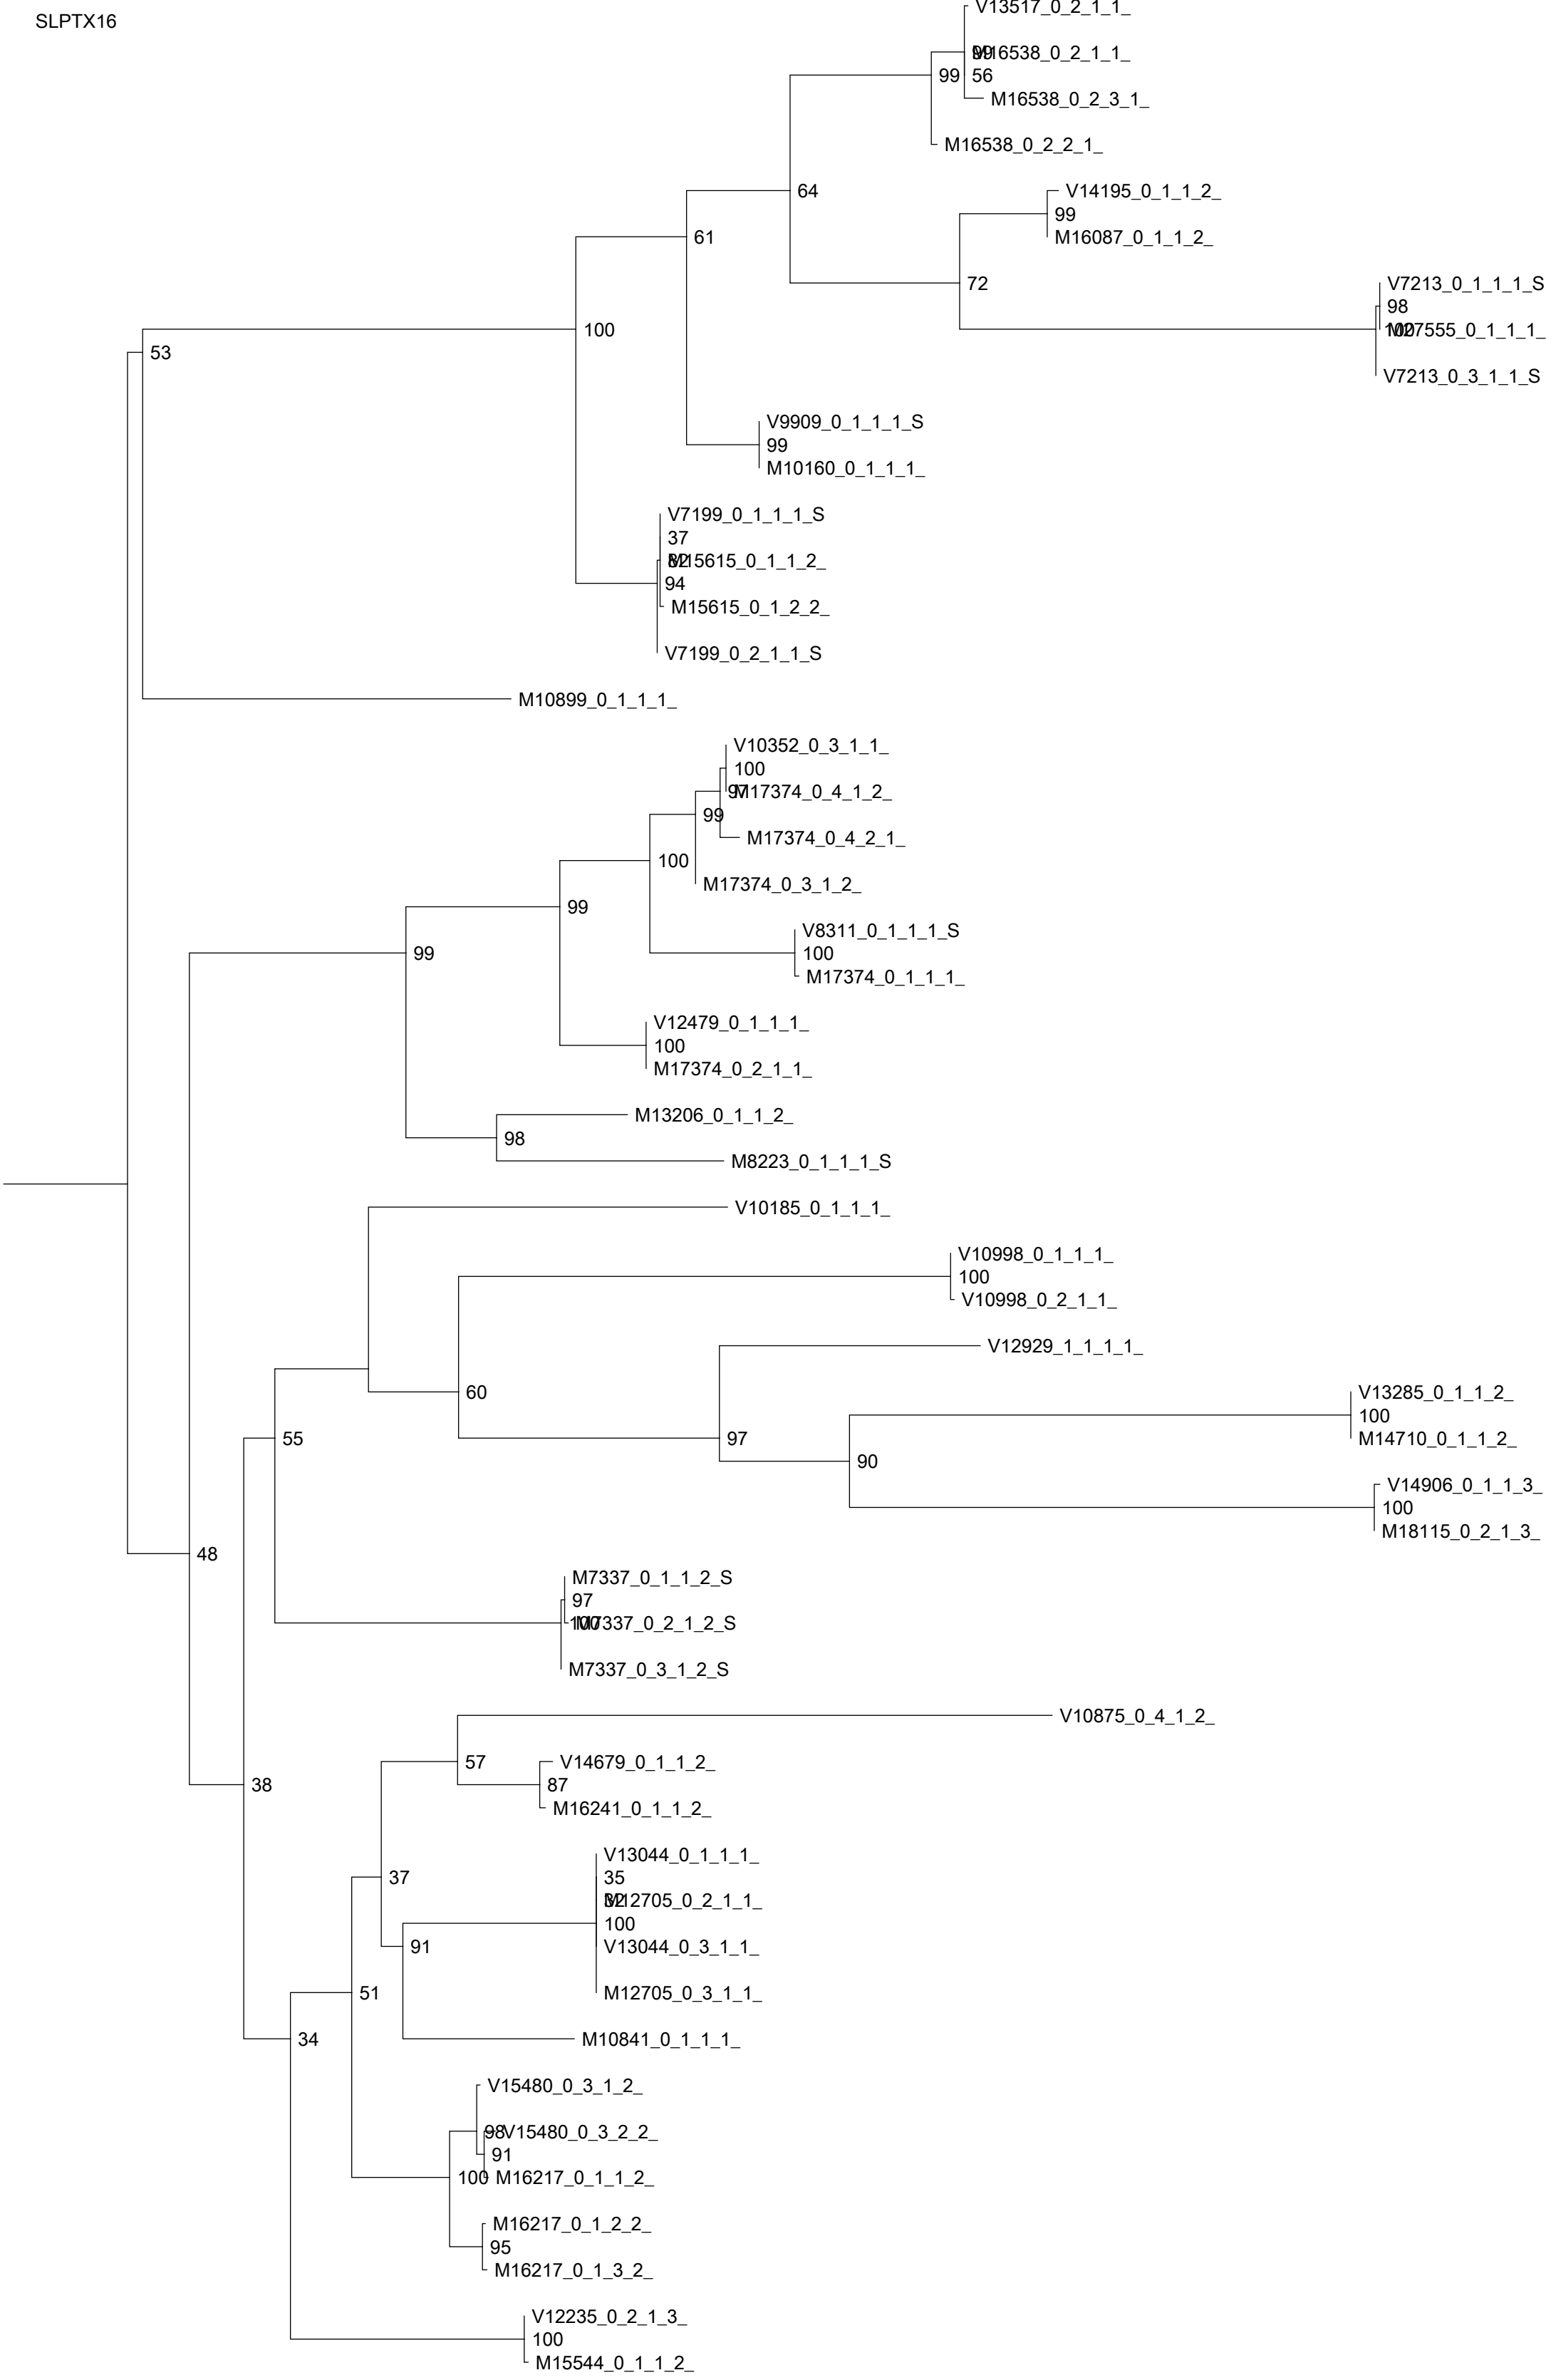

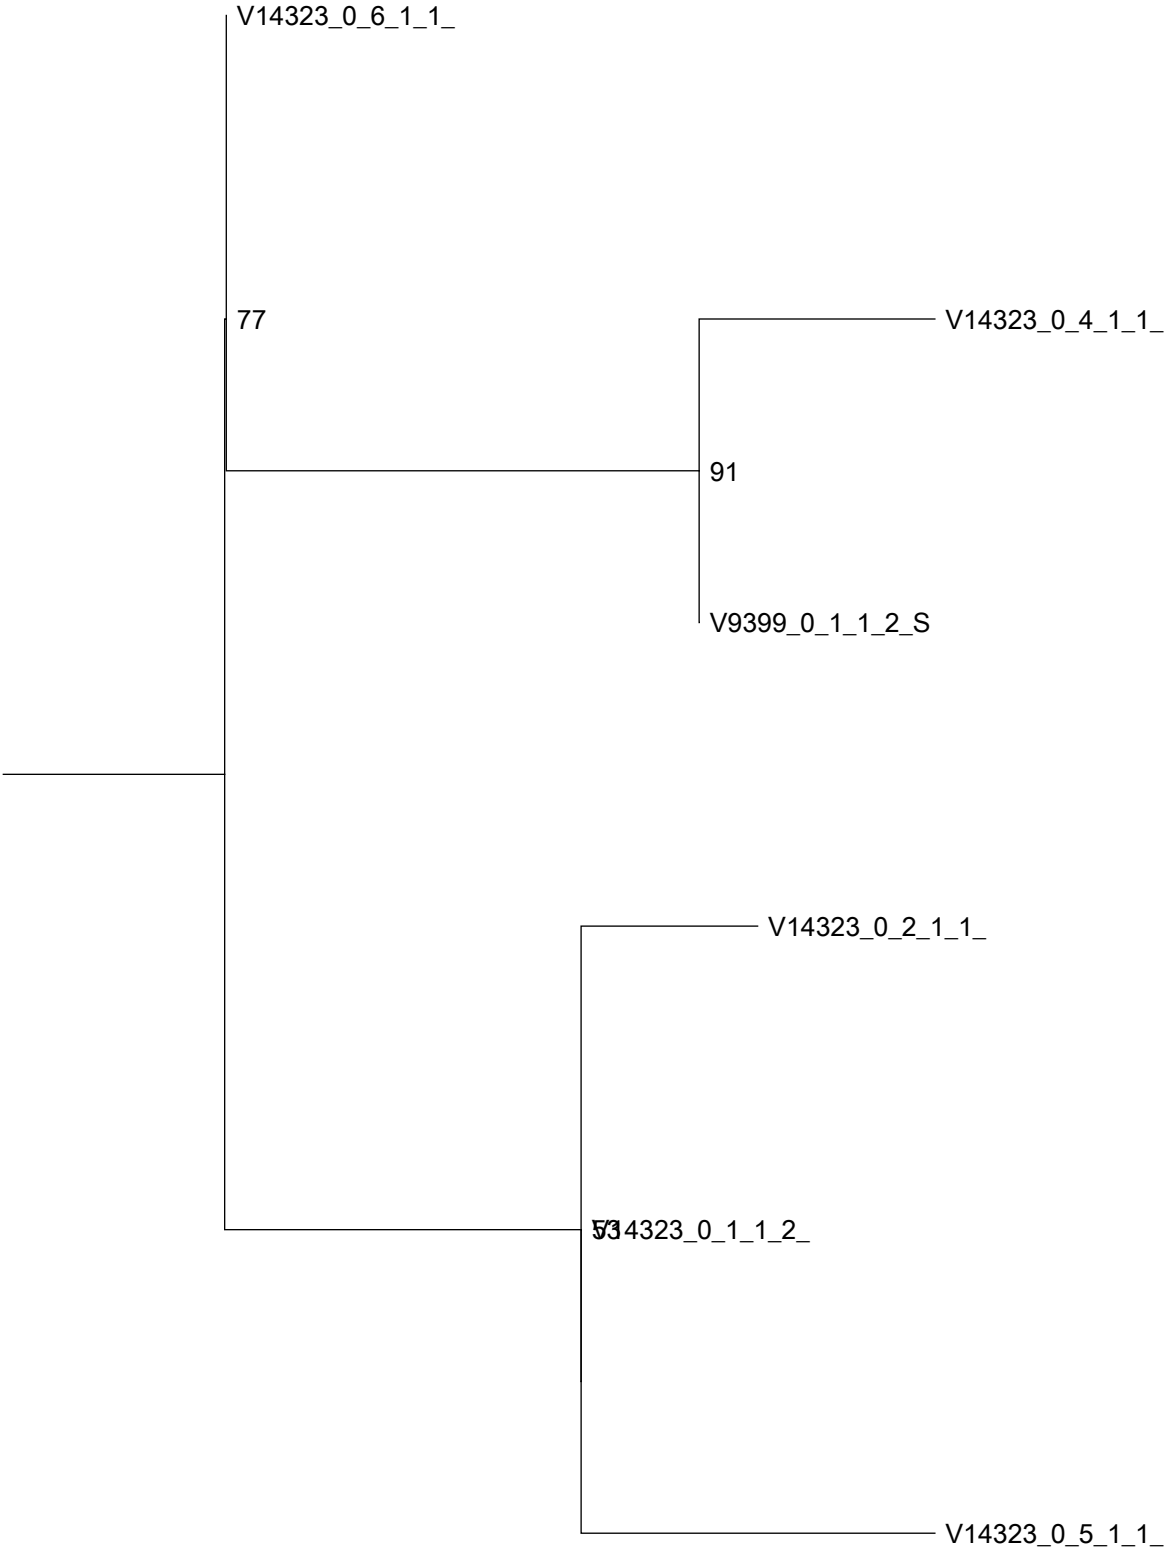

Transferrin

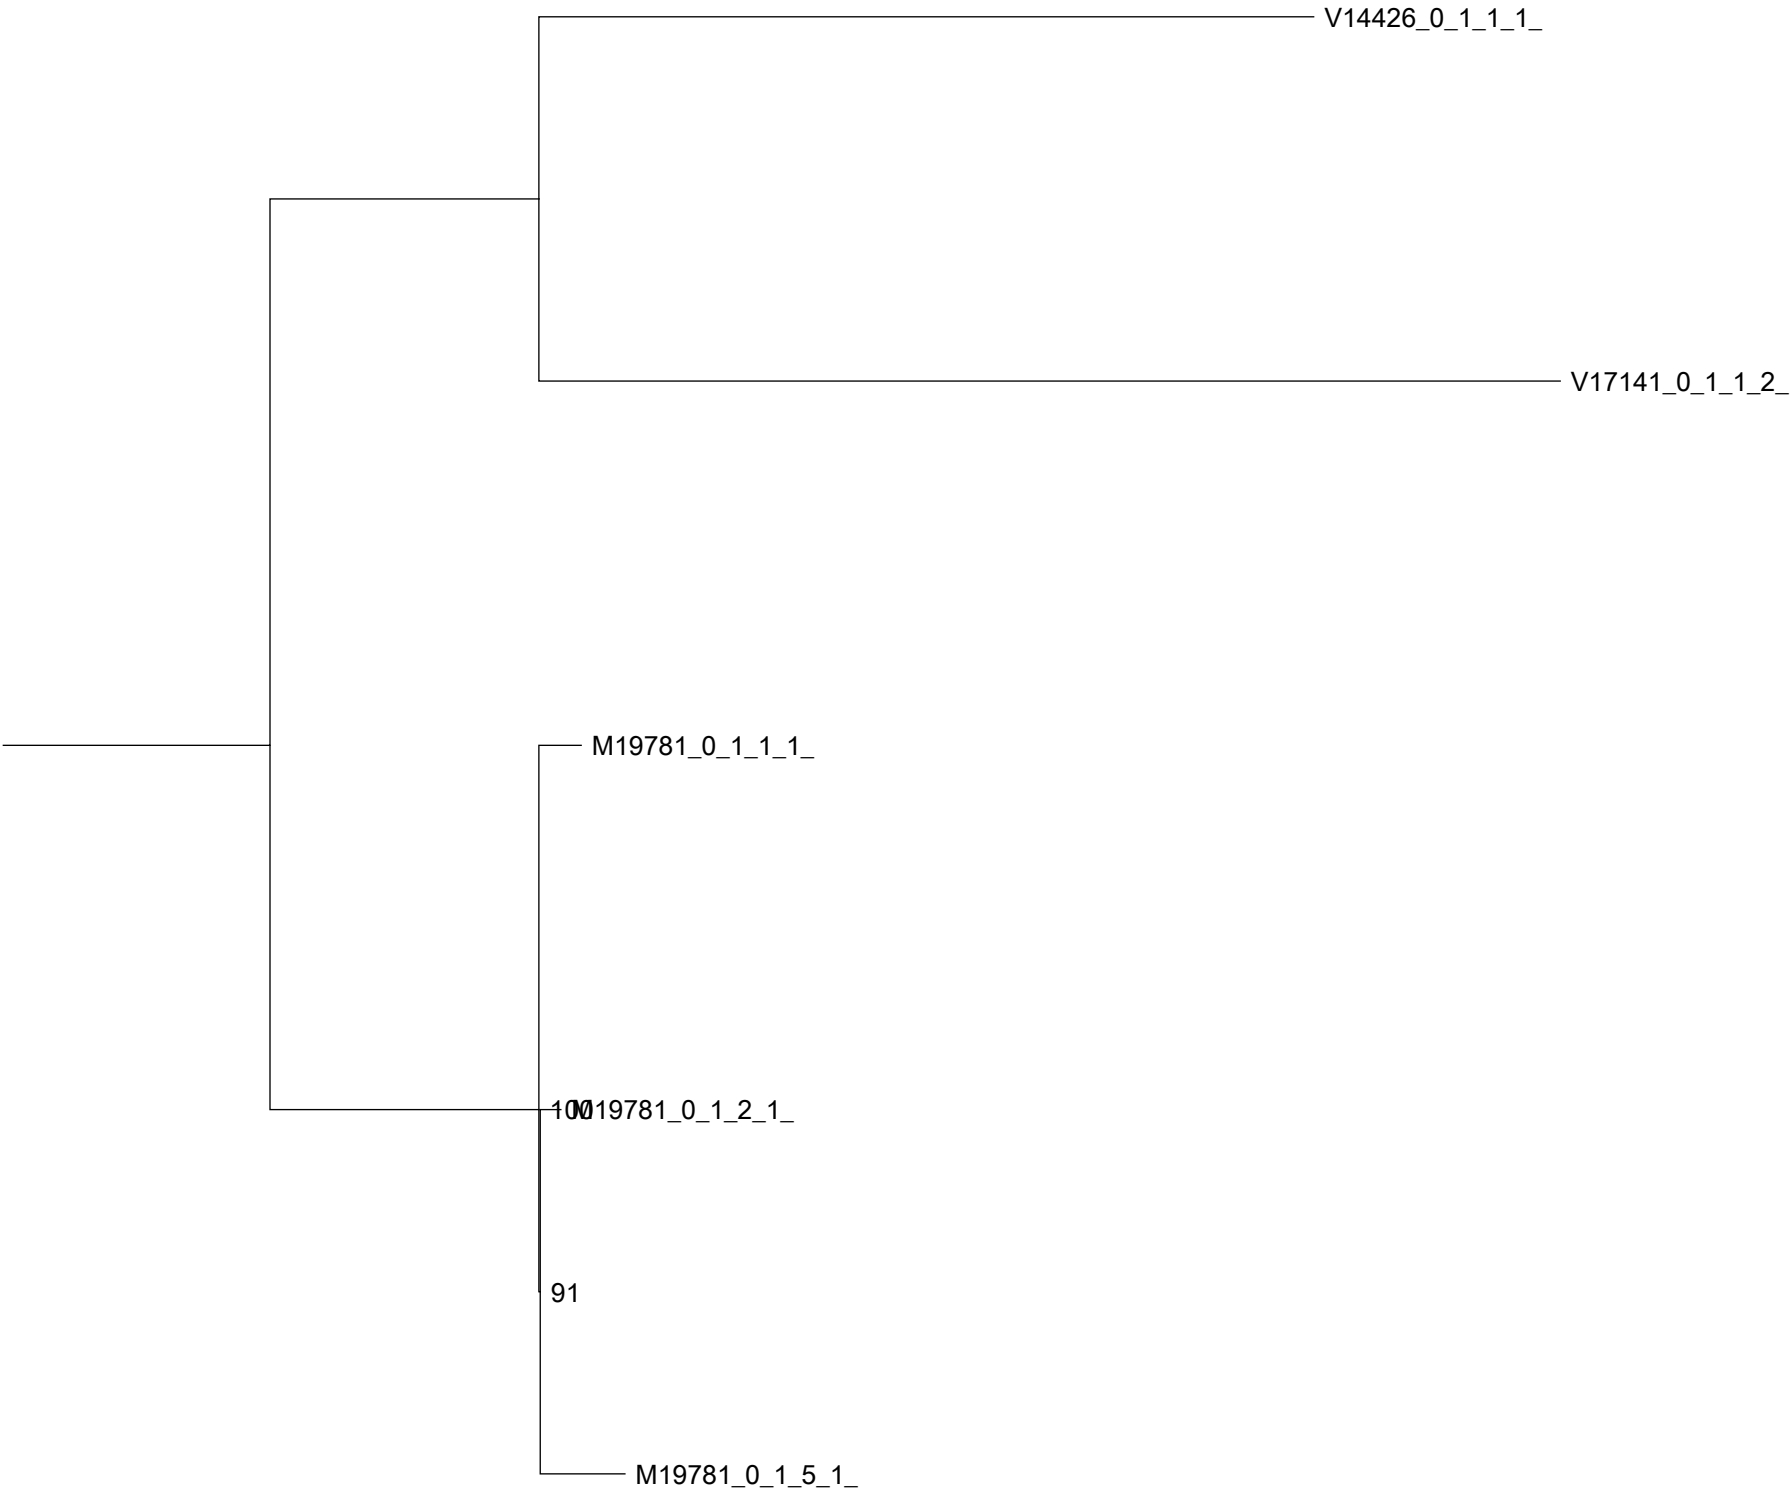

0.1

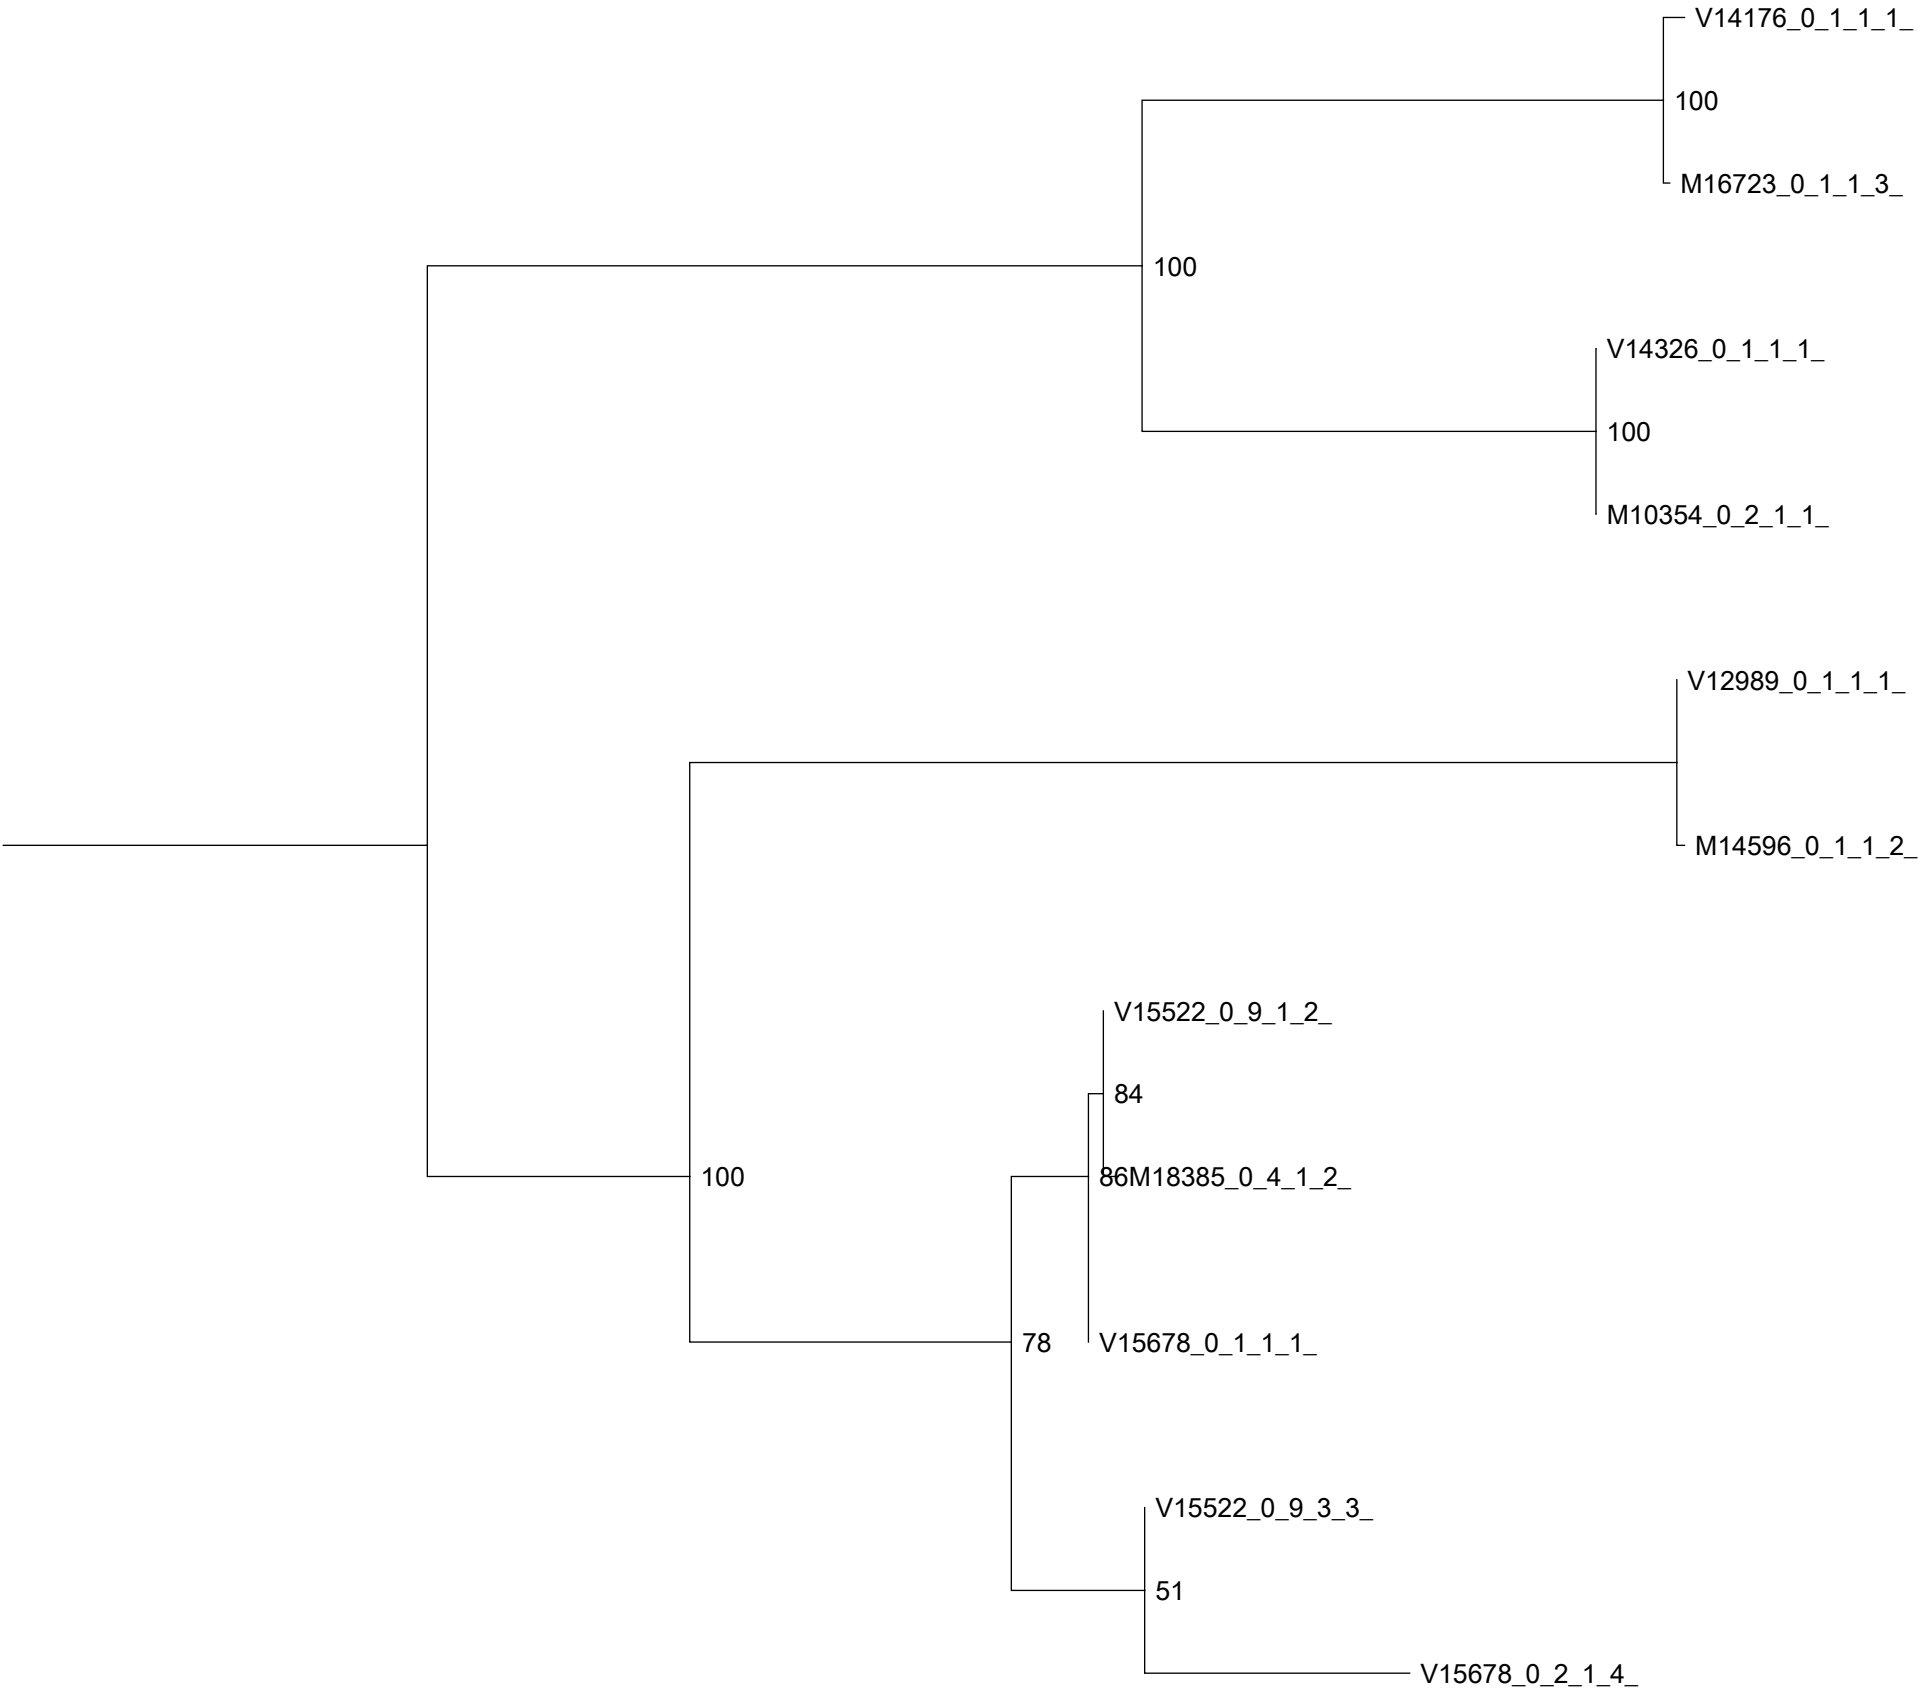

Supplement: s1 [file s1]

BPFTx

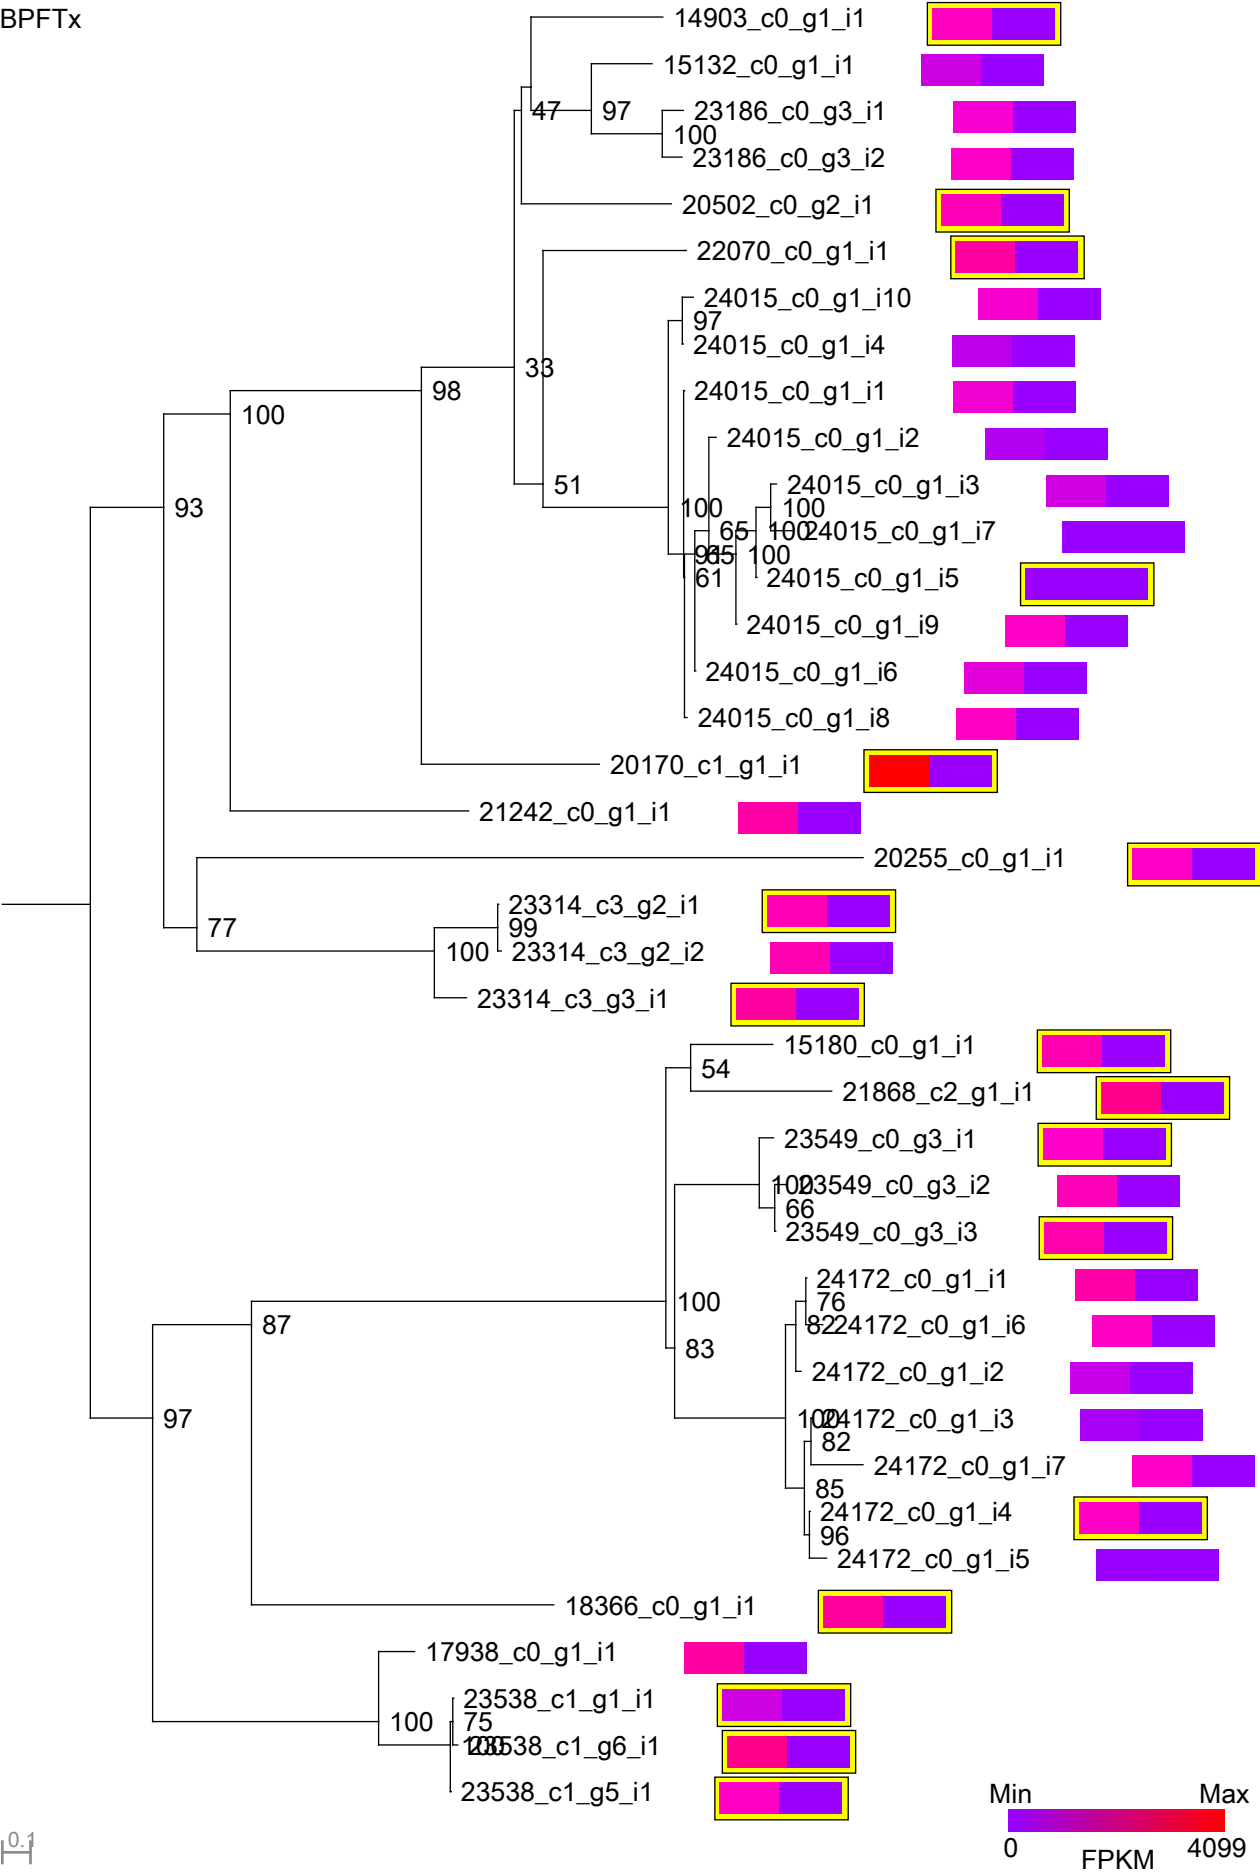

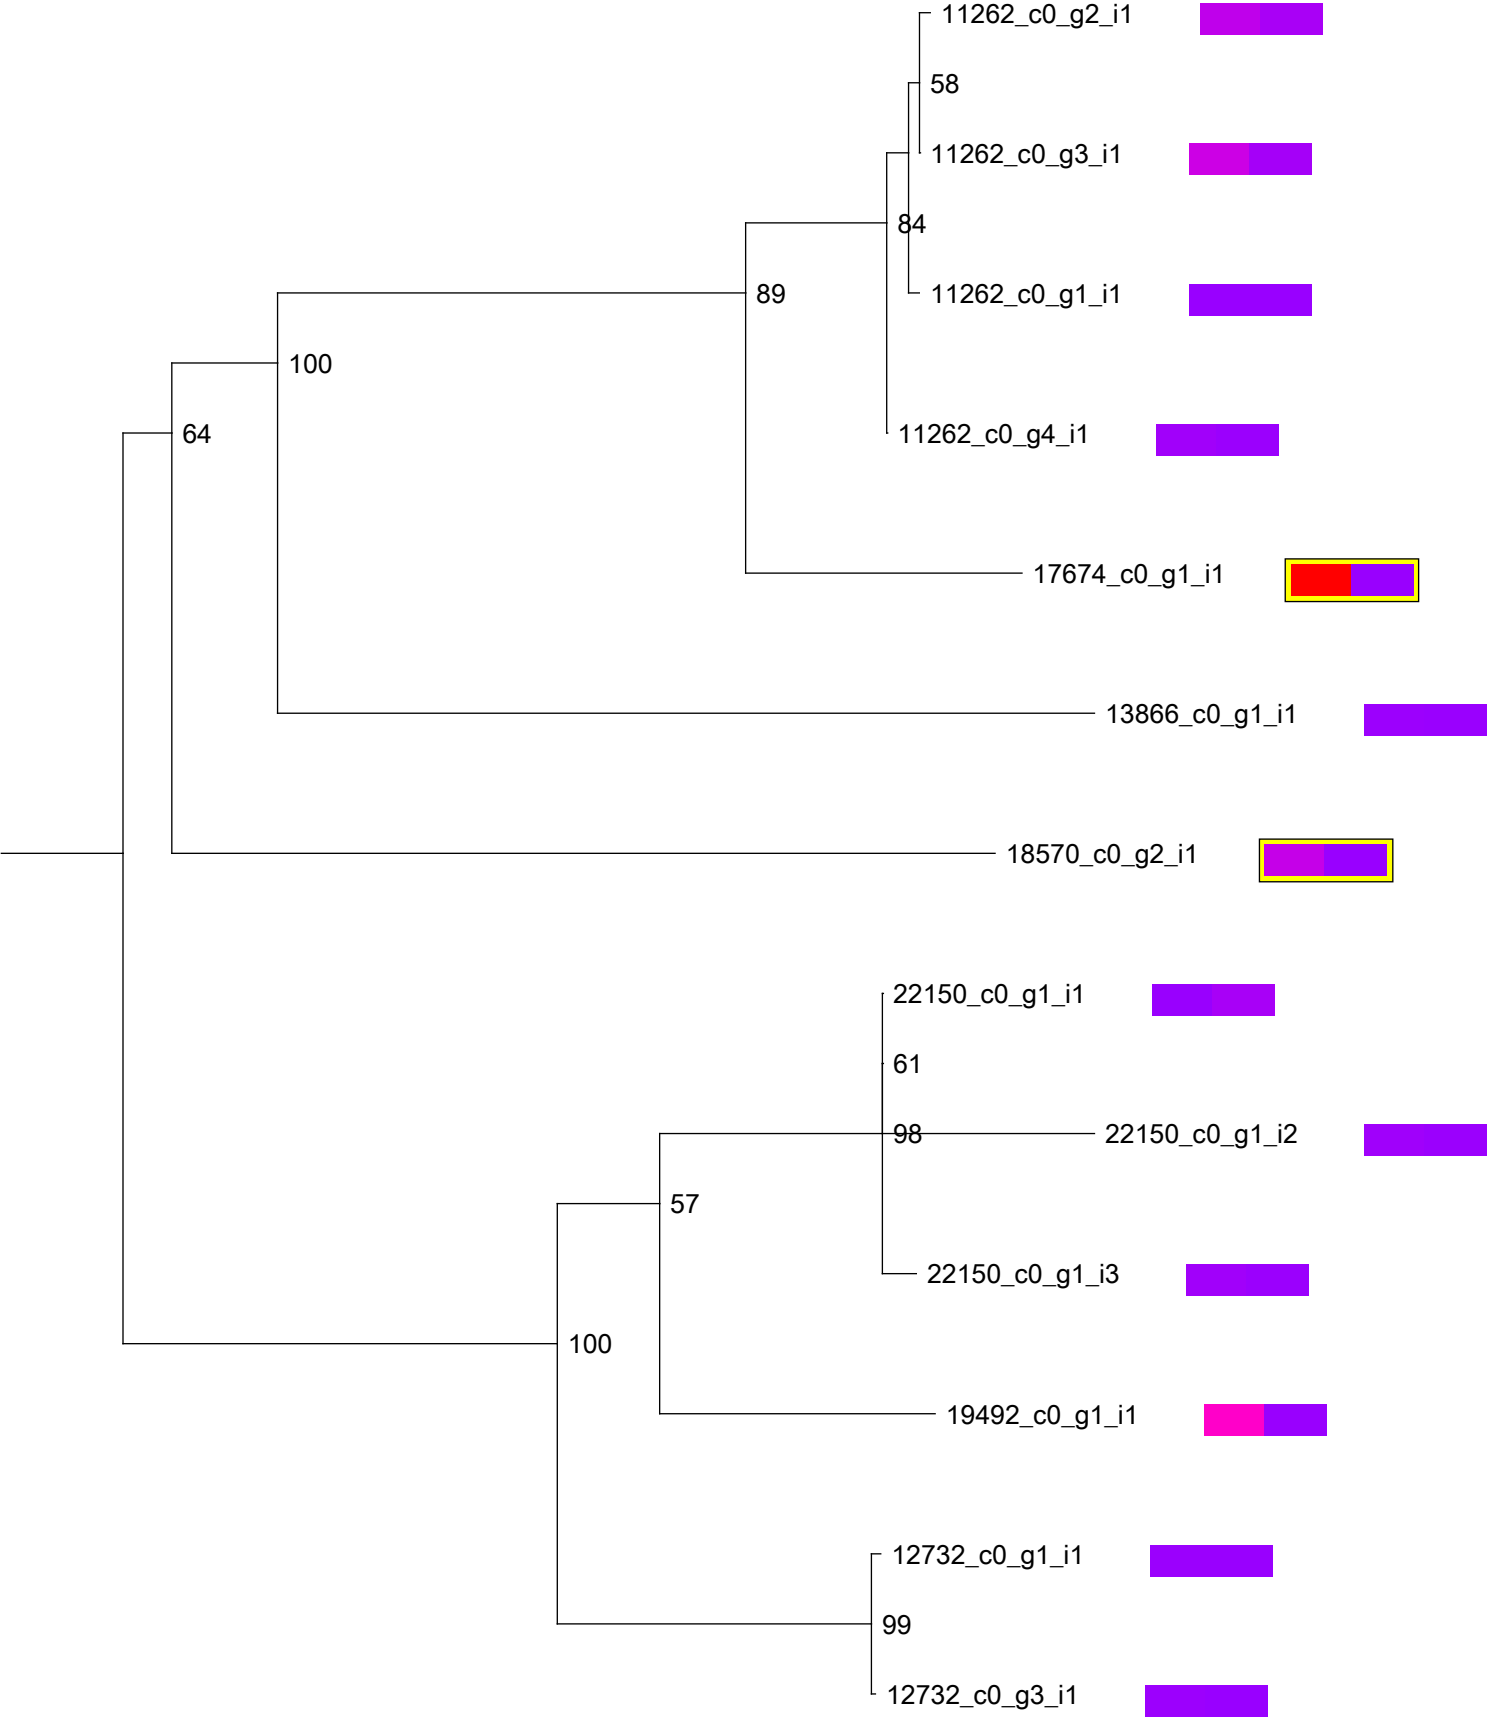

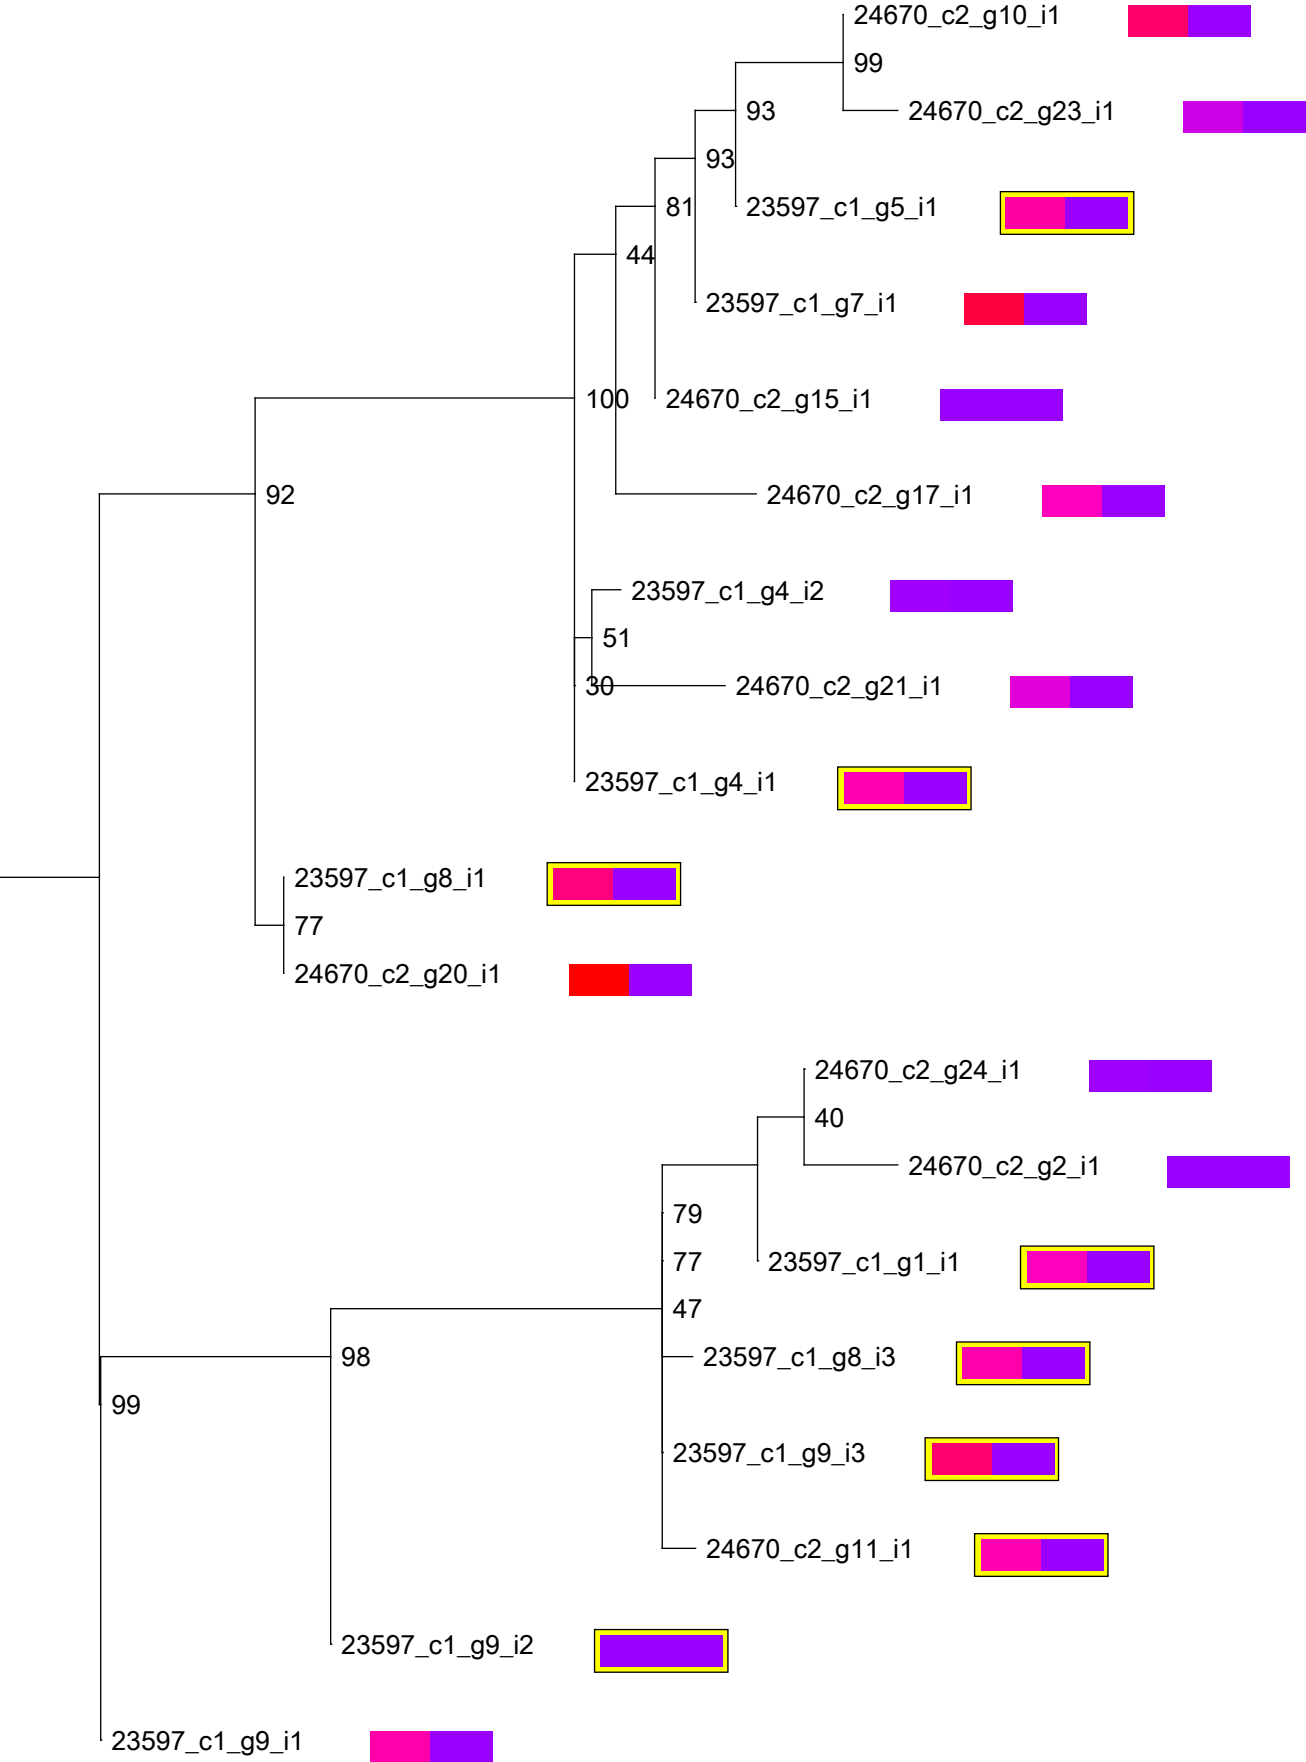

CO-Esterase B

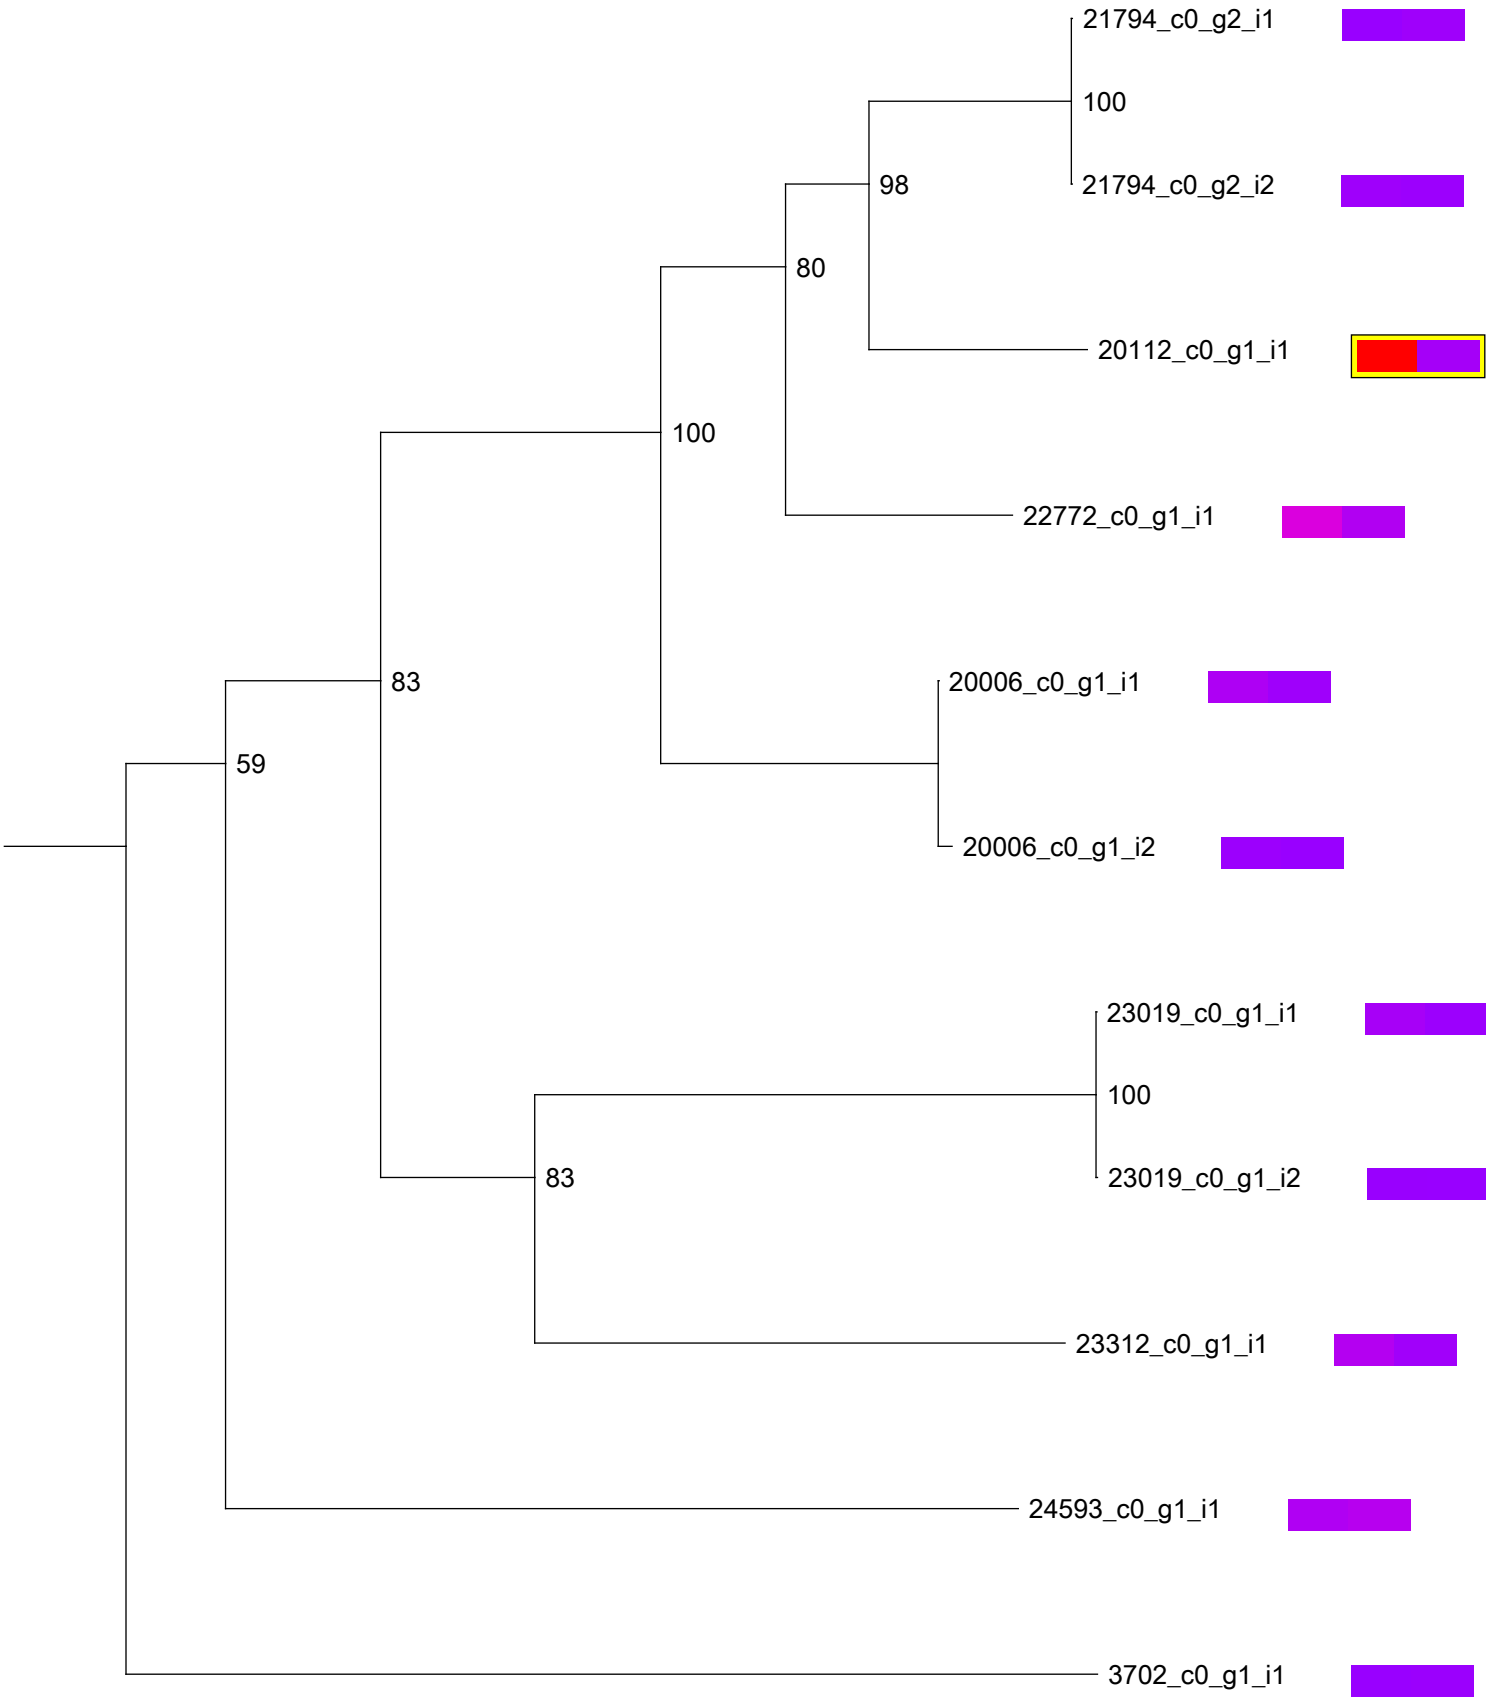

0.1

Min Max  
0 FPKM 857

GDH

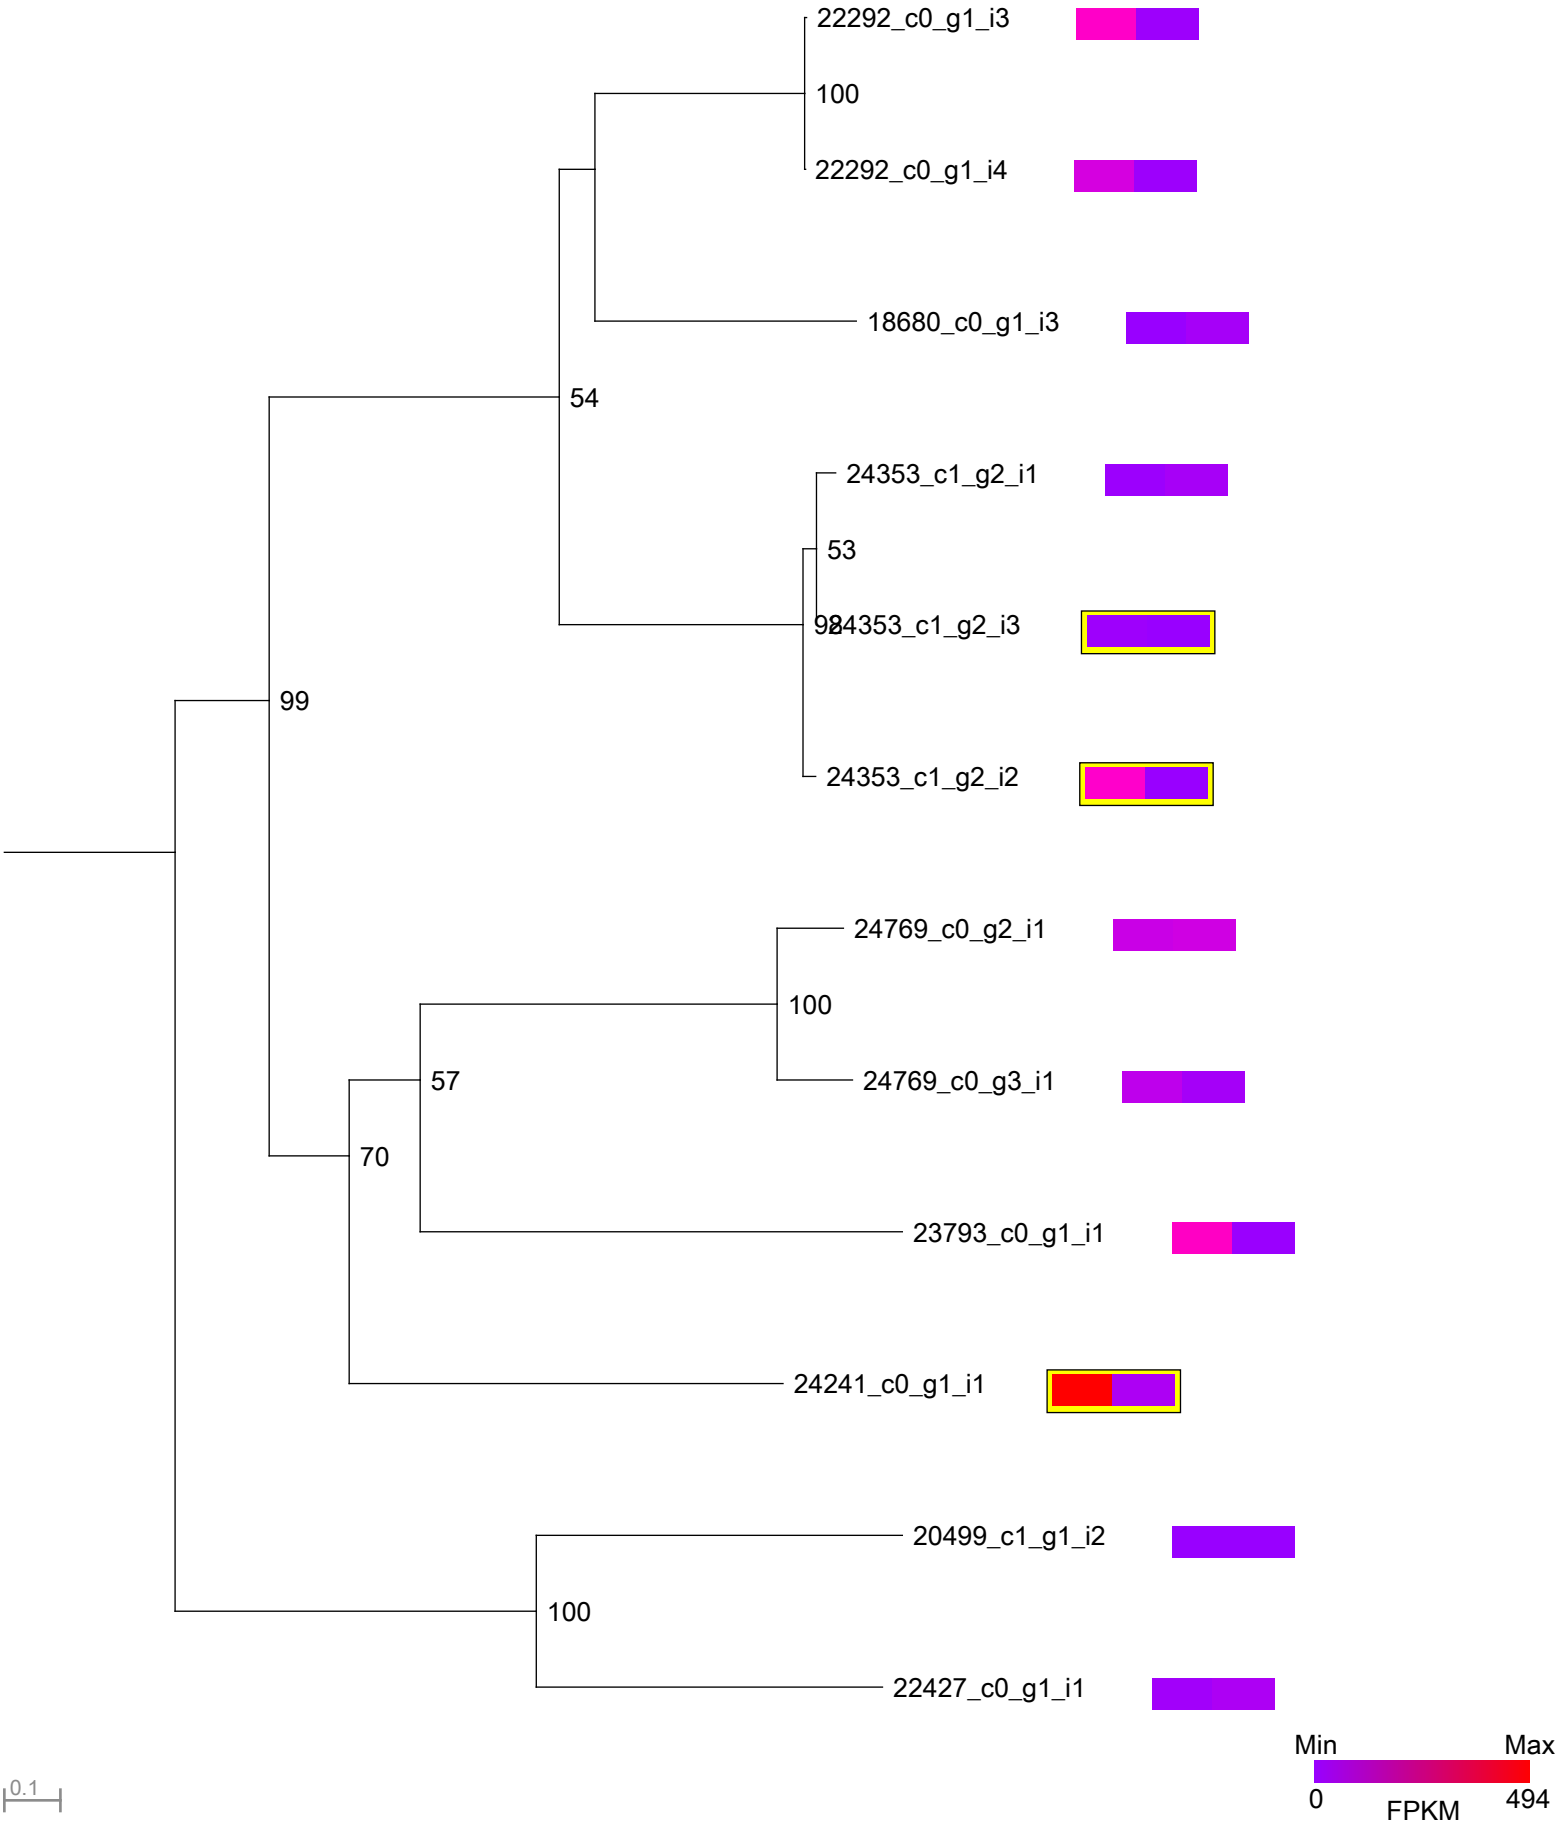

## LDLA

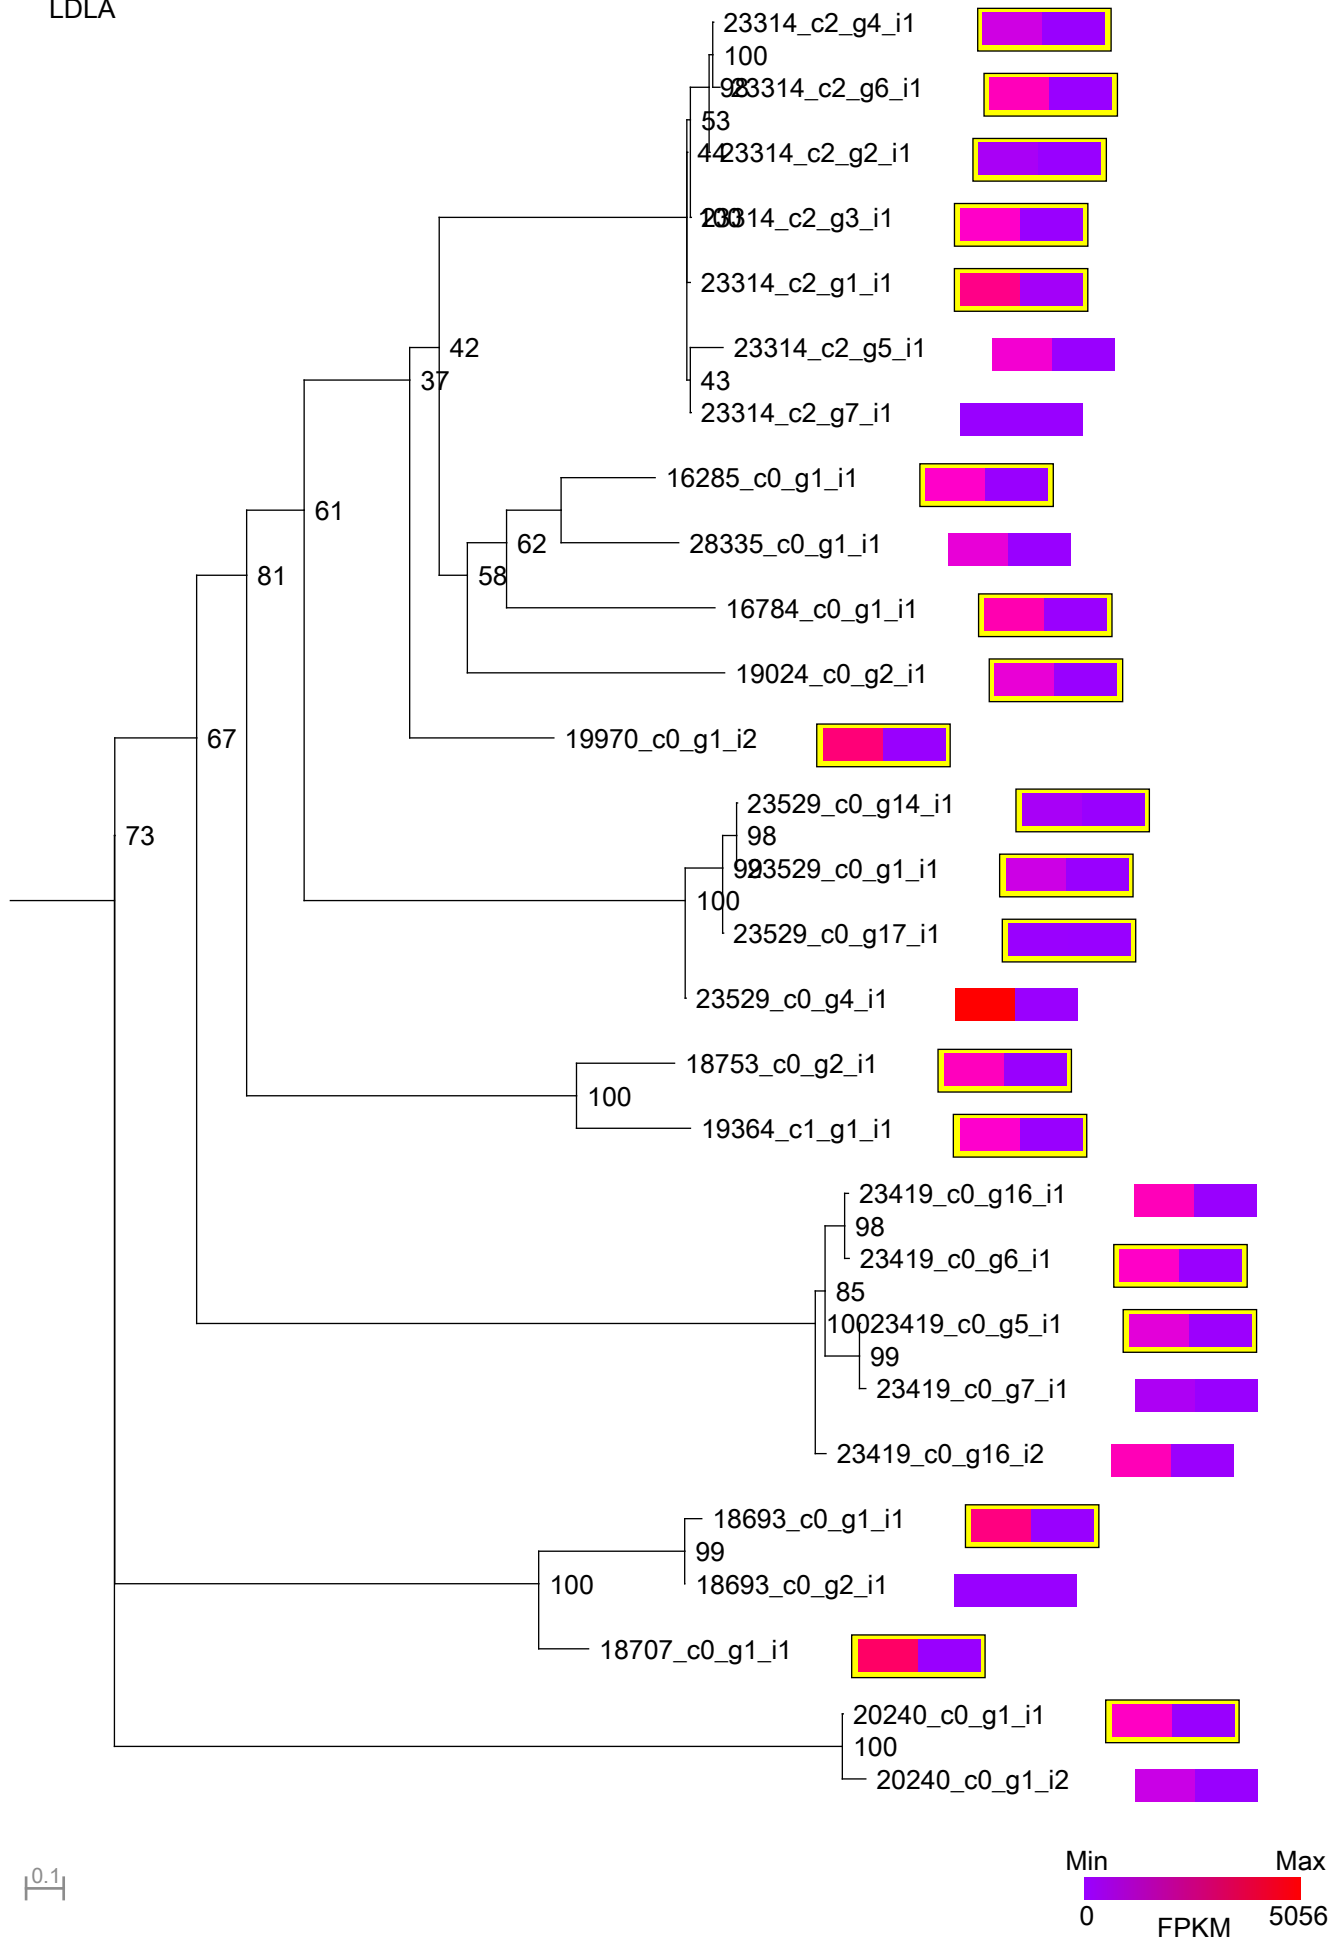

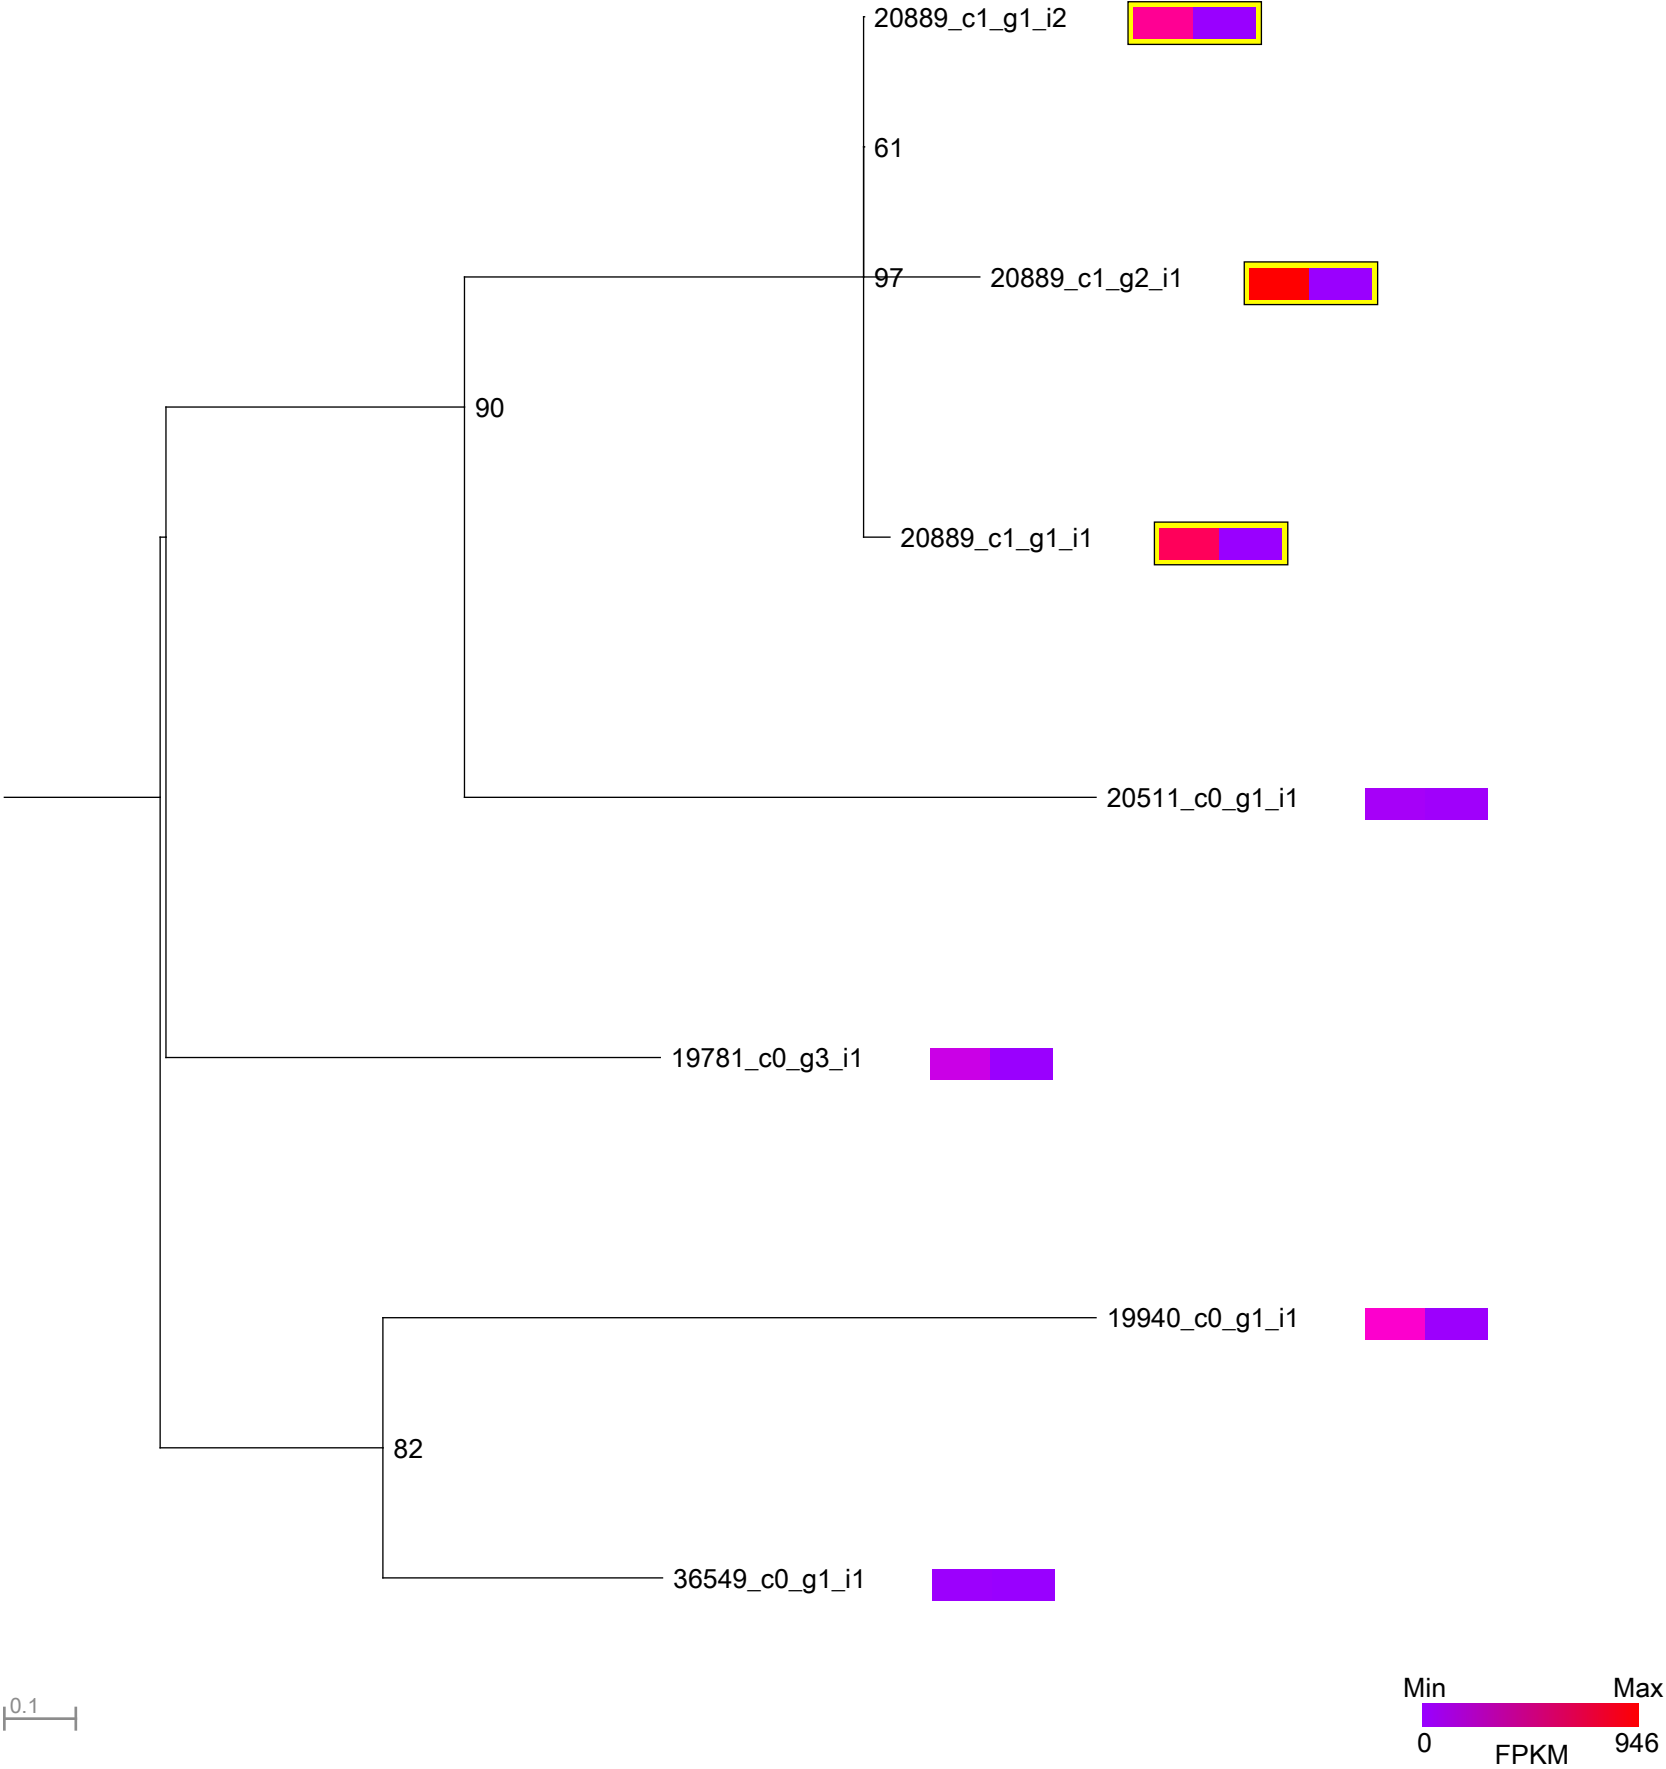

pM12A

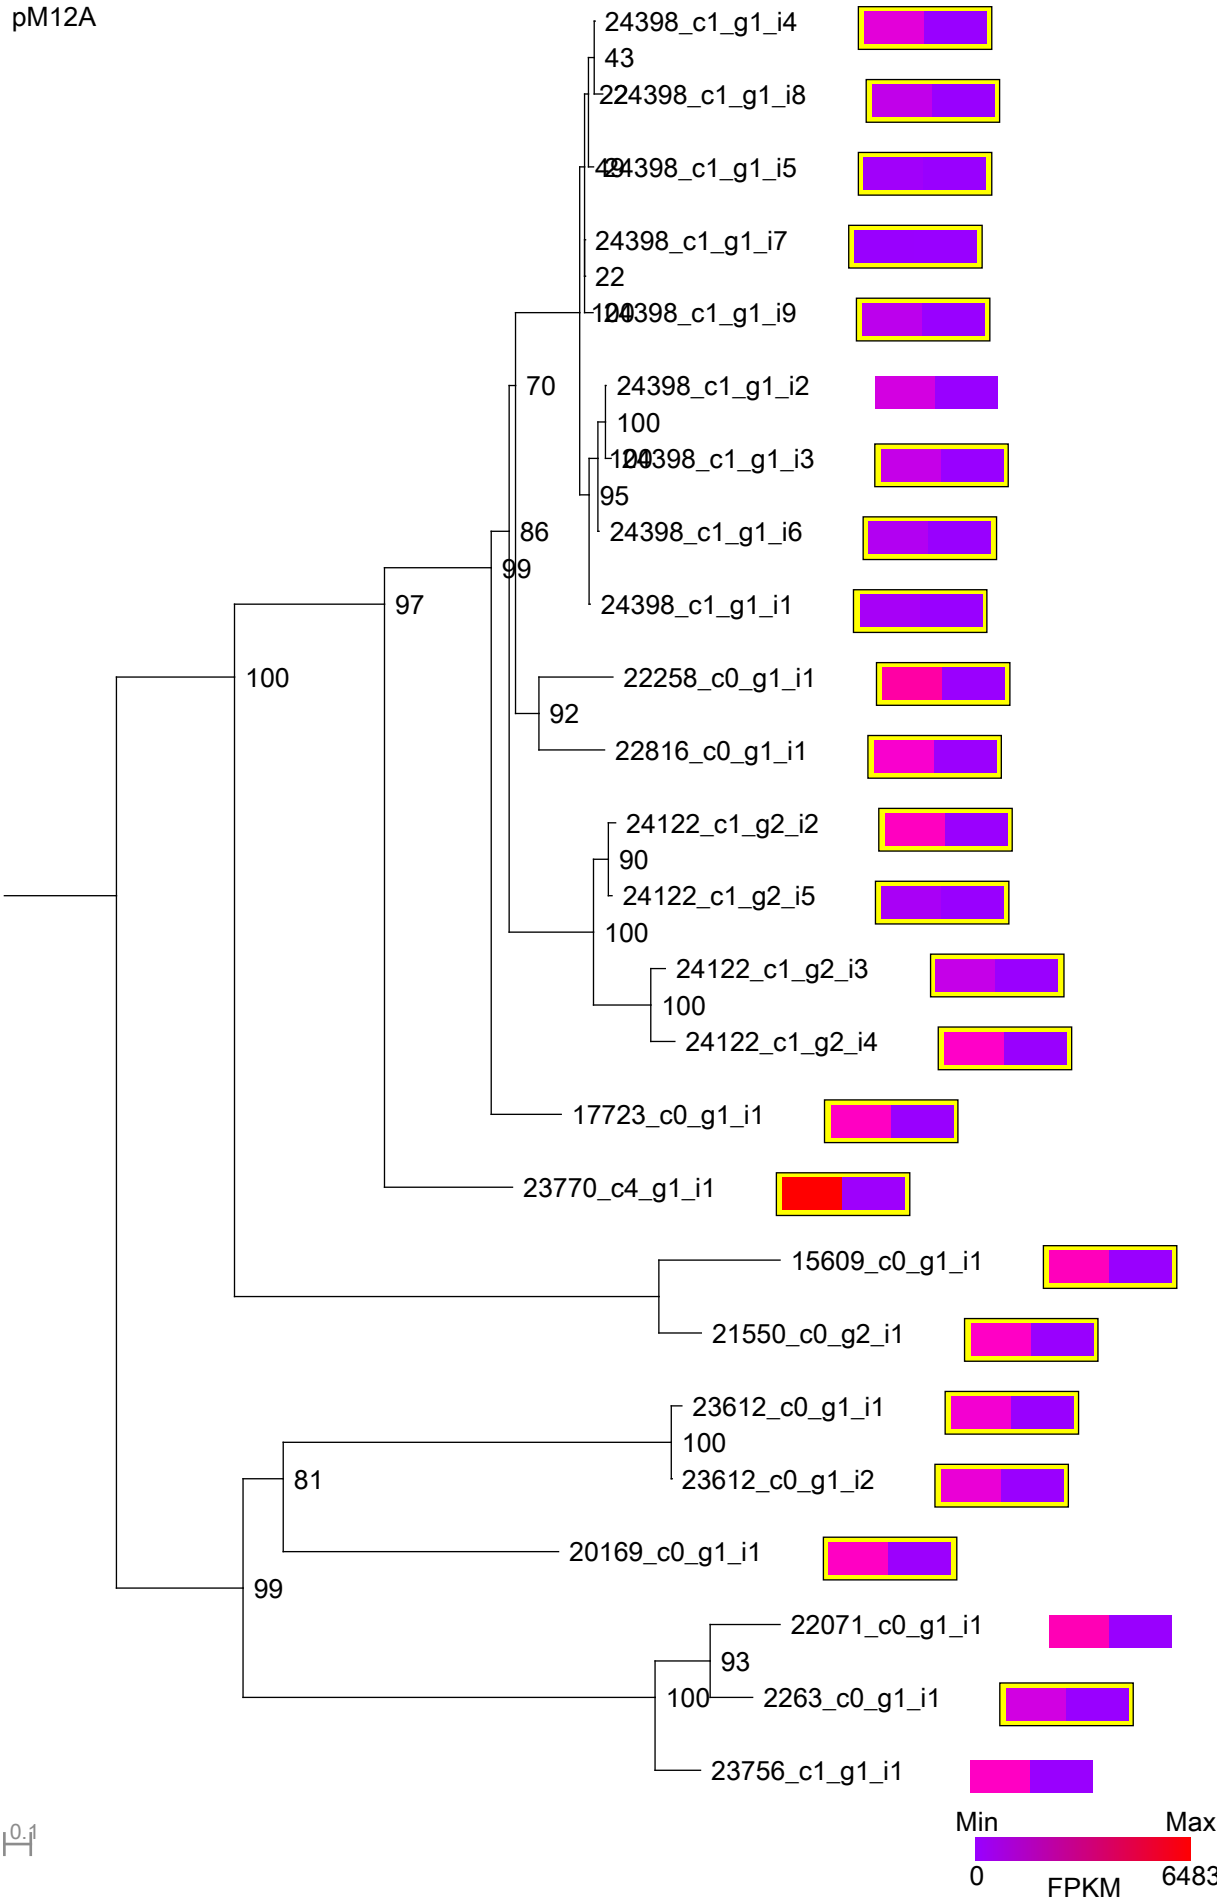



S1

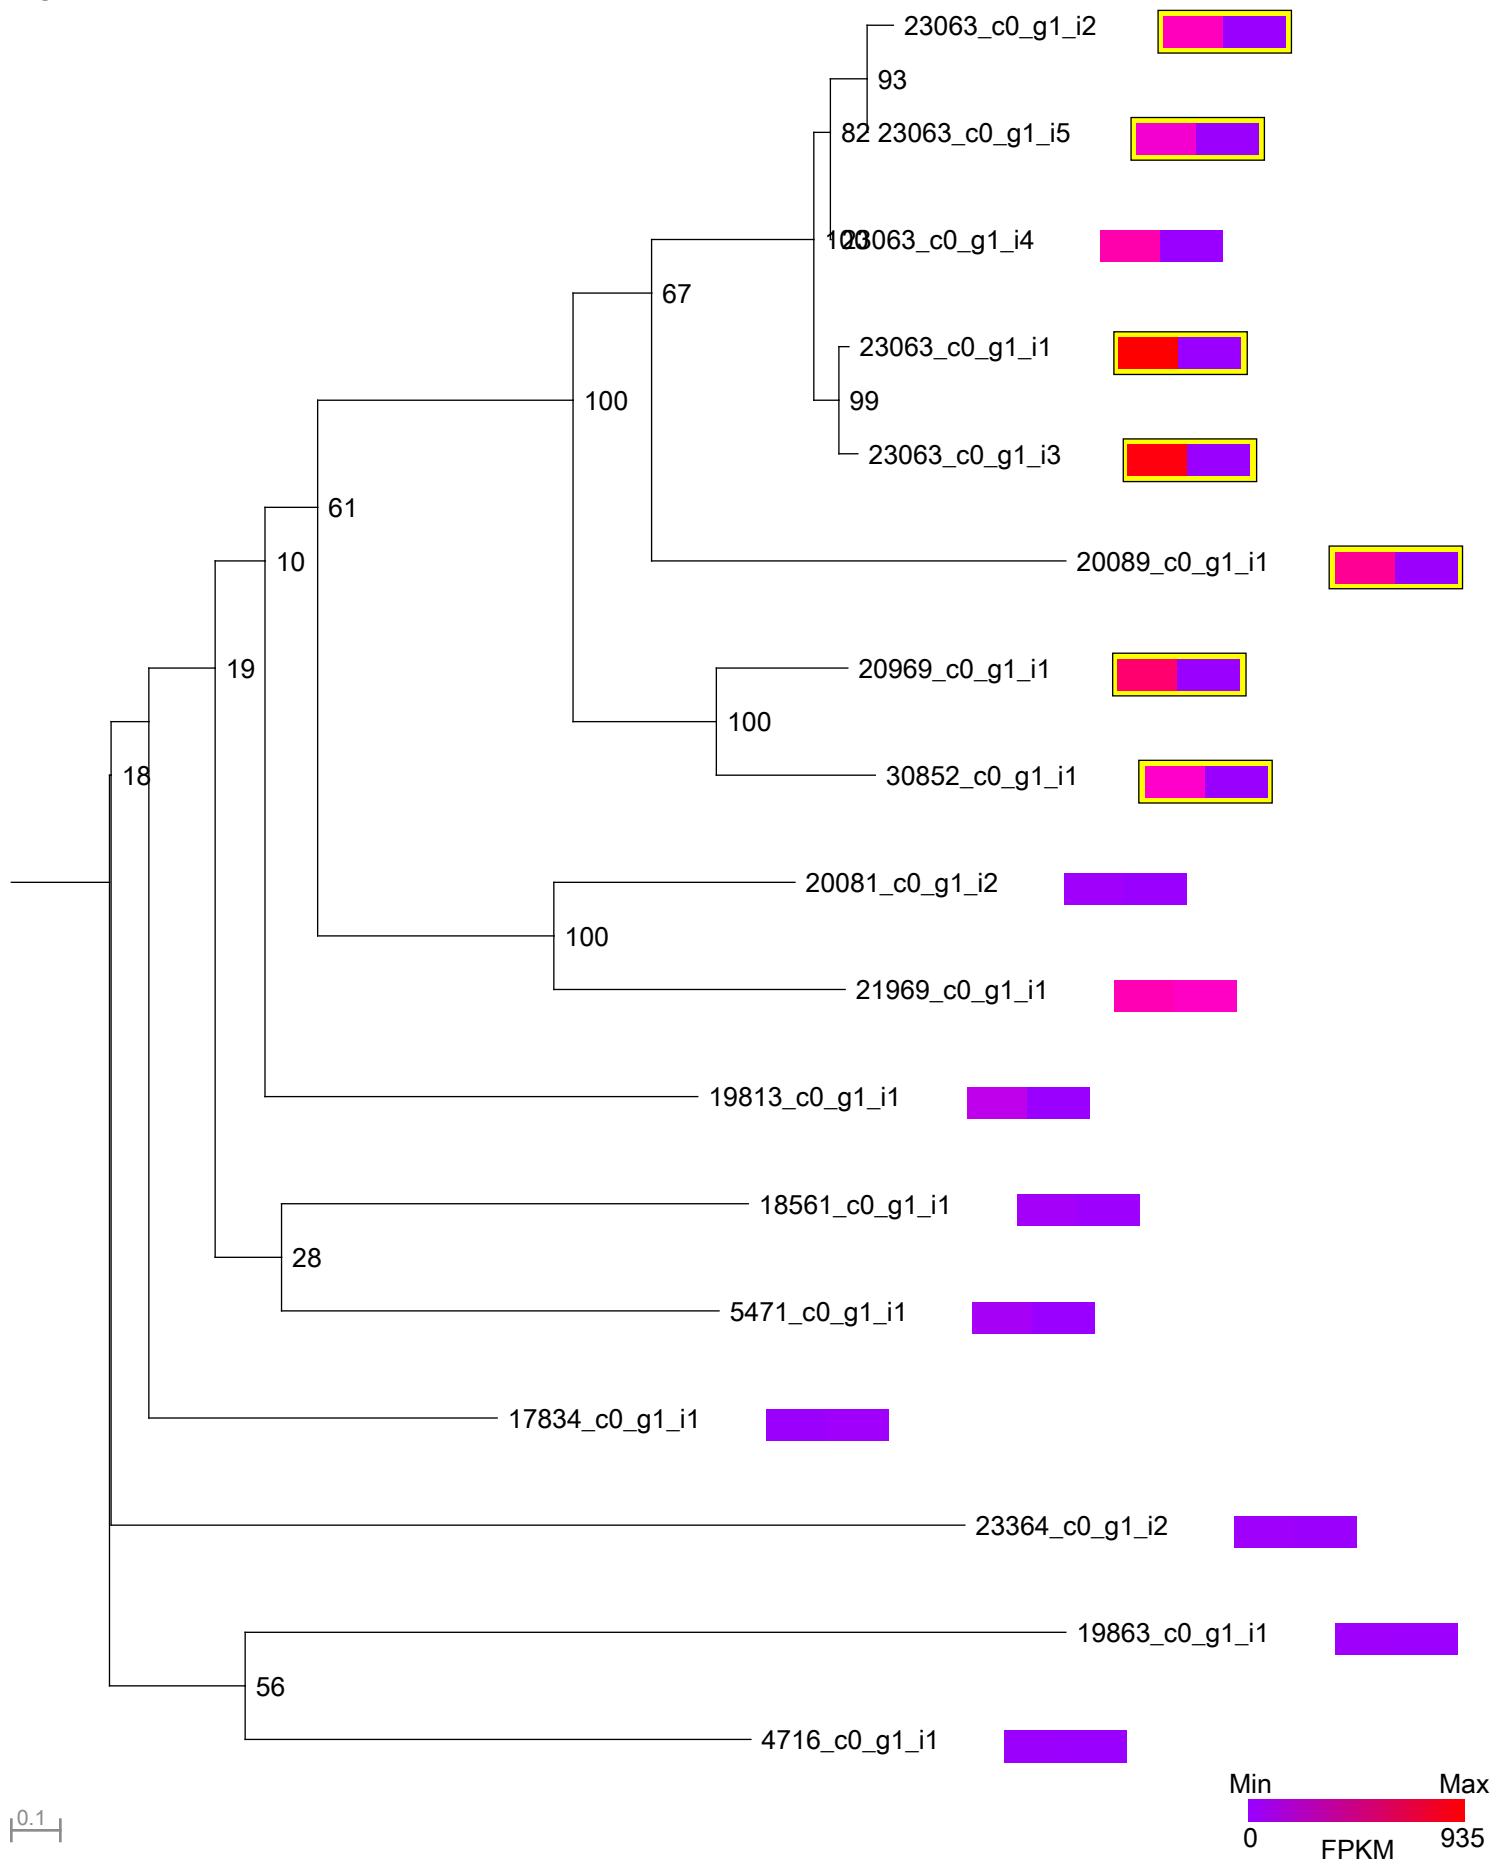

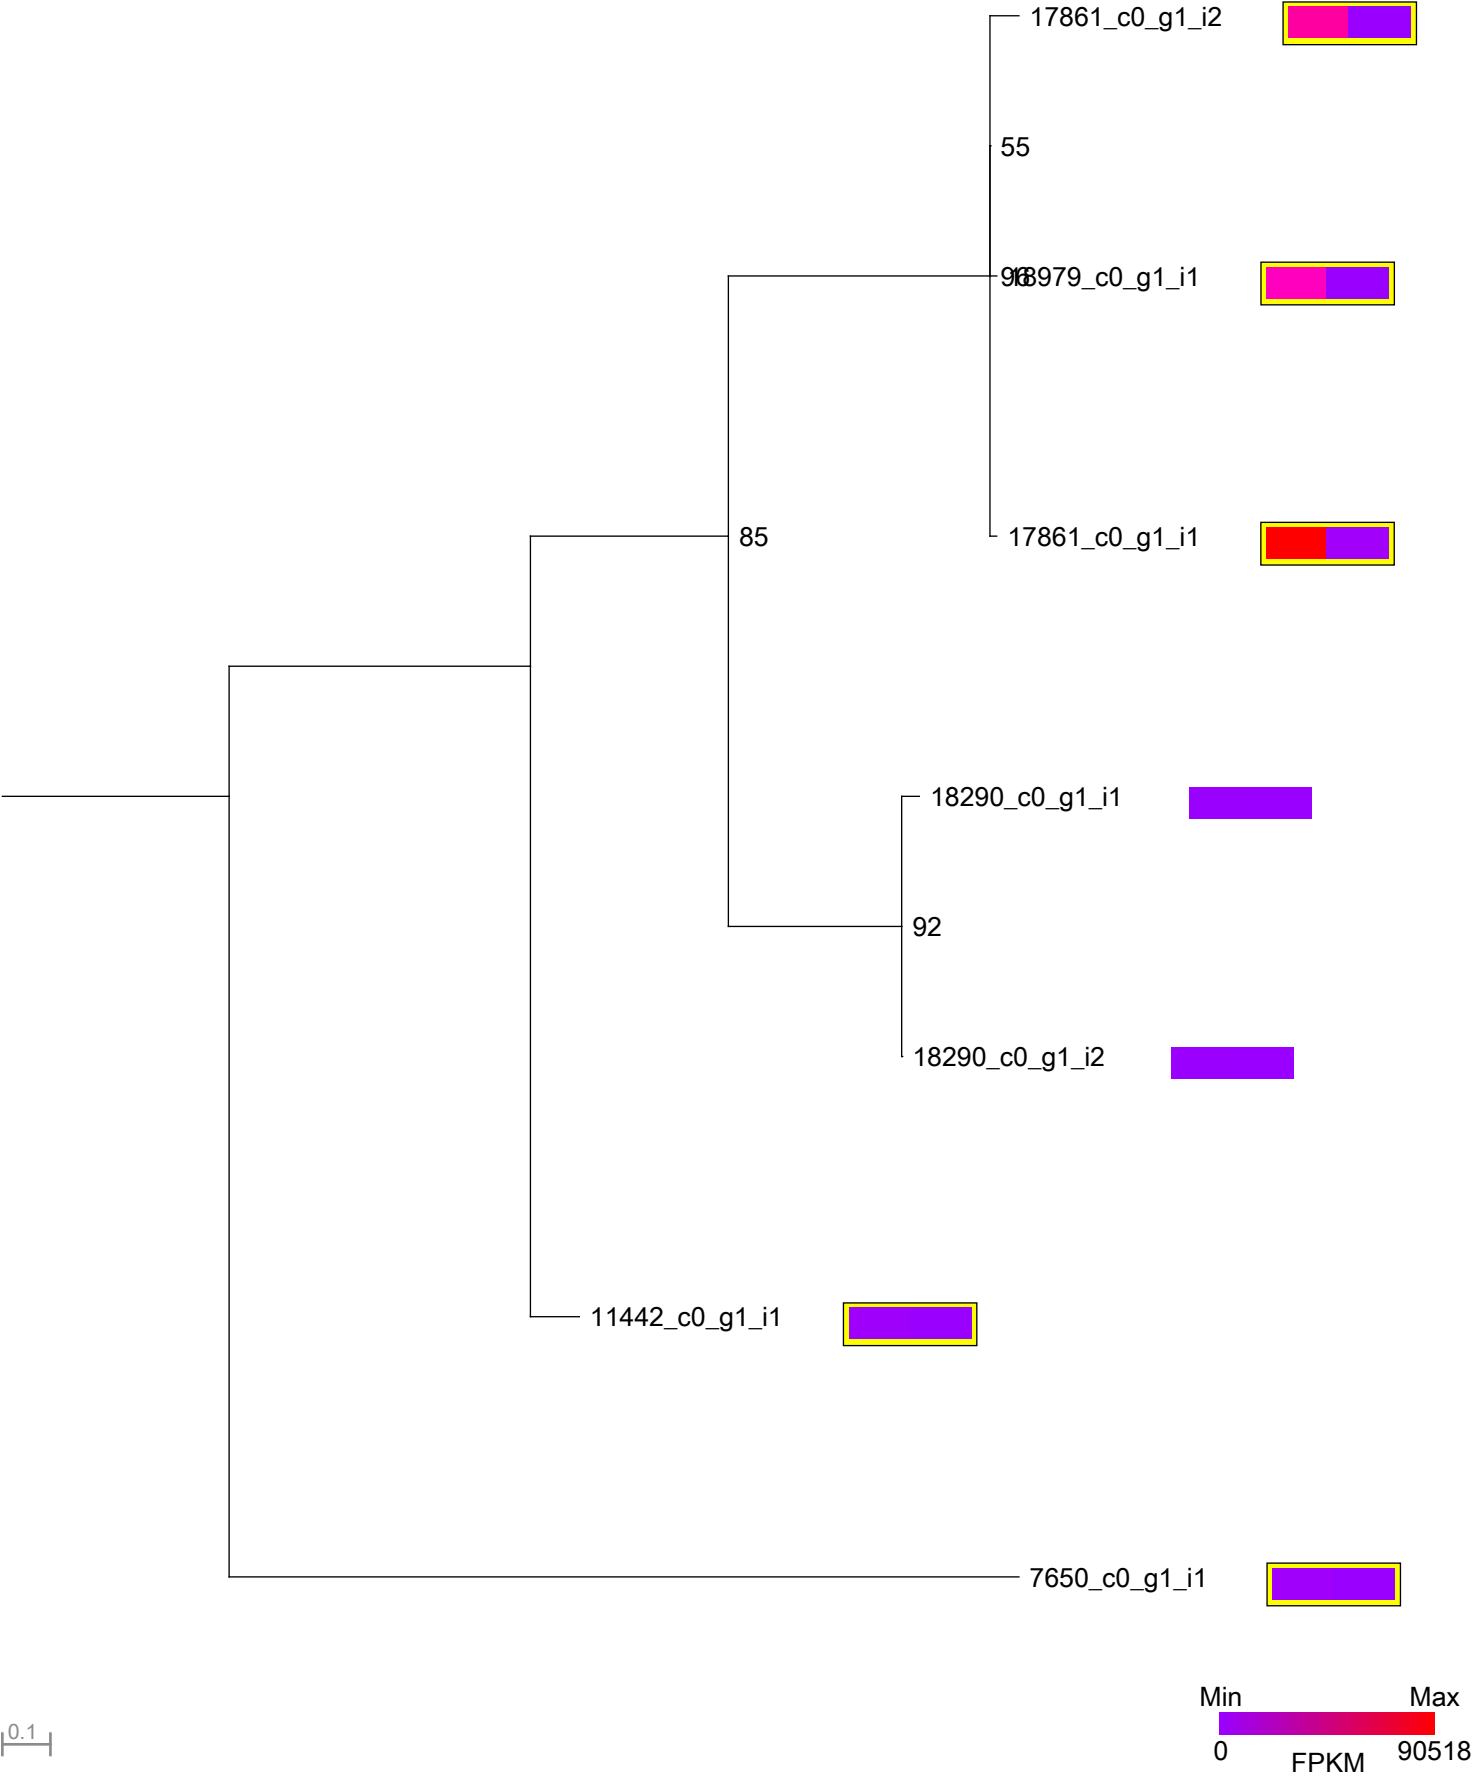

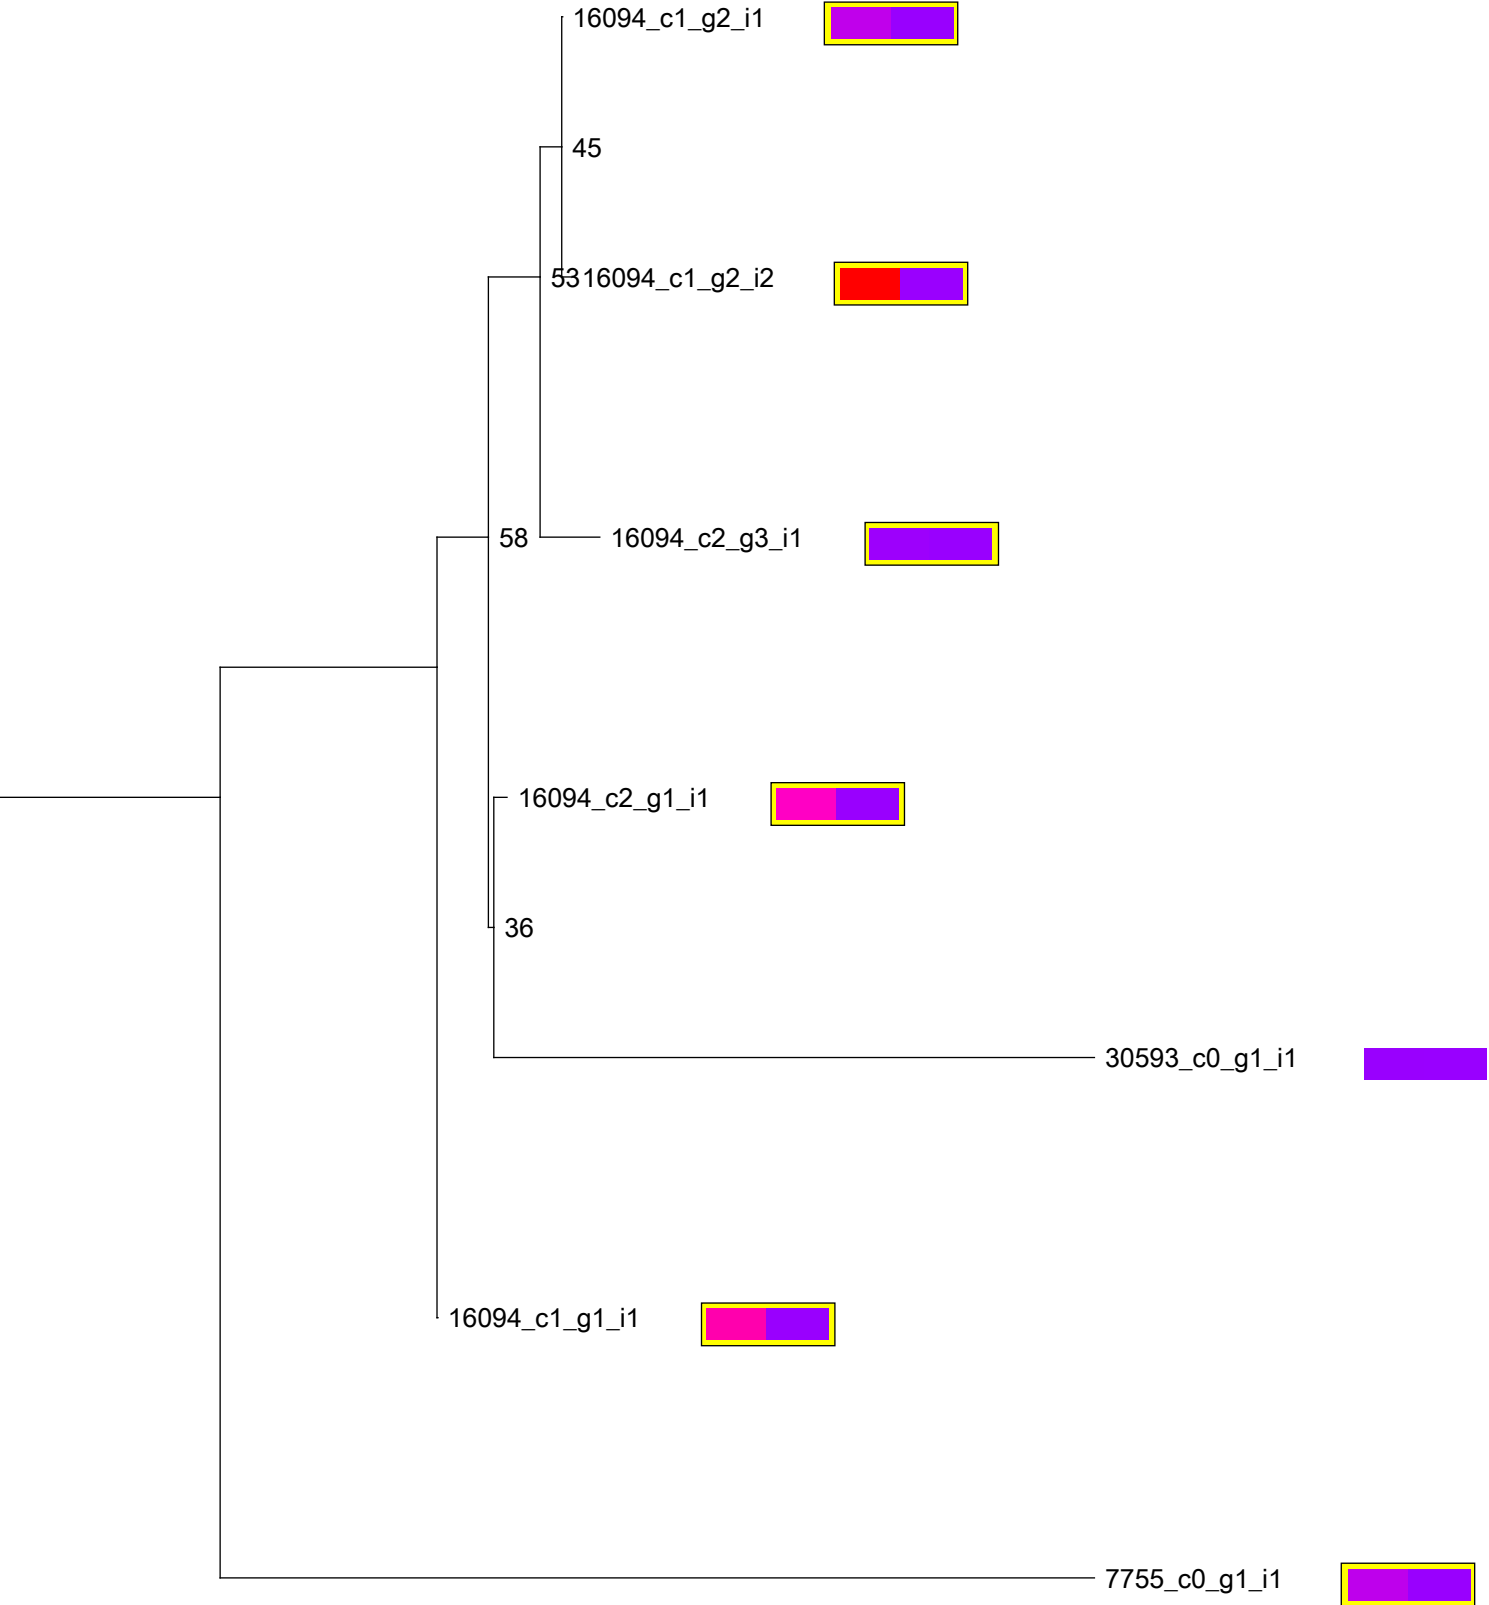

0.1

Min Max  
0 30412  
FPKM

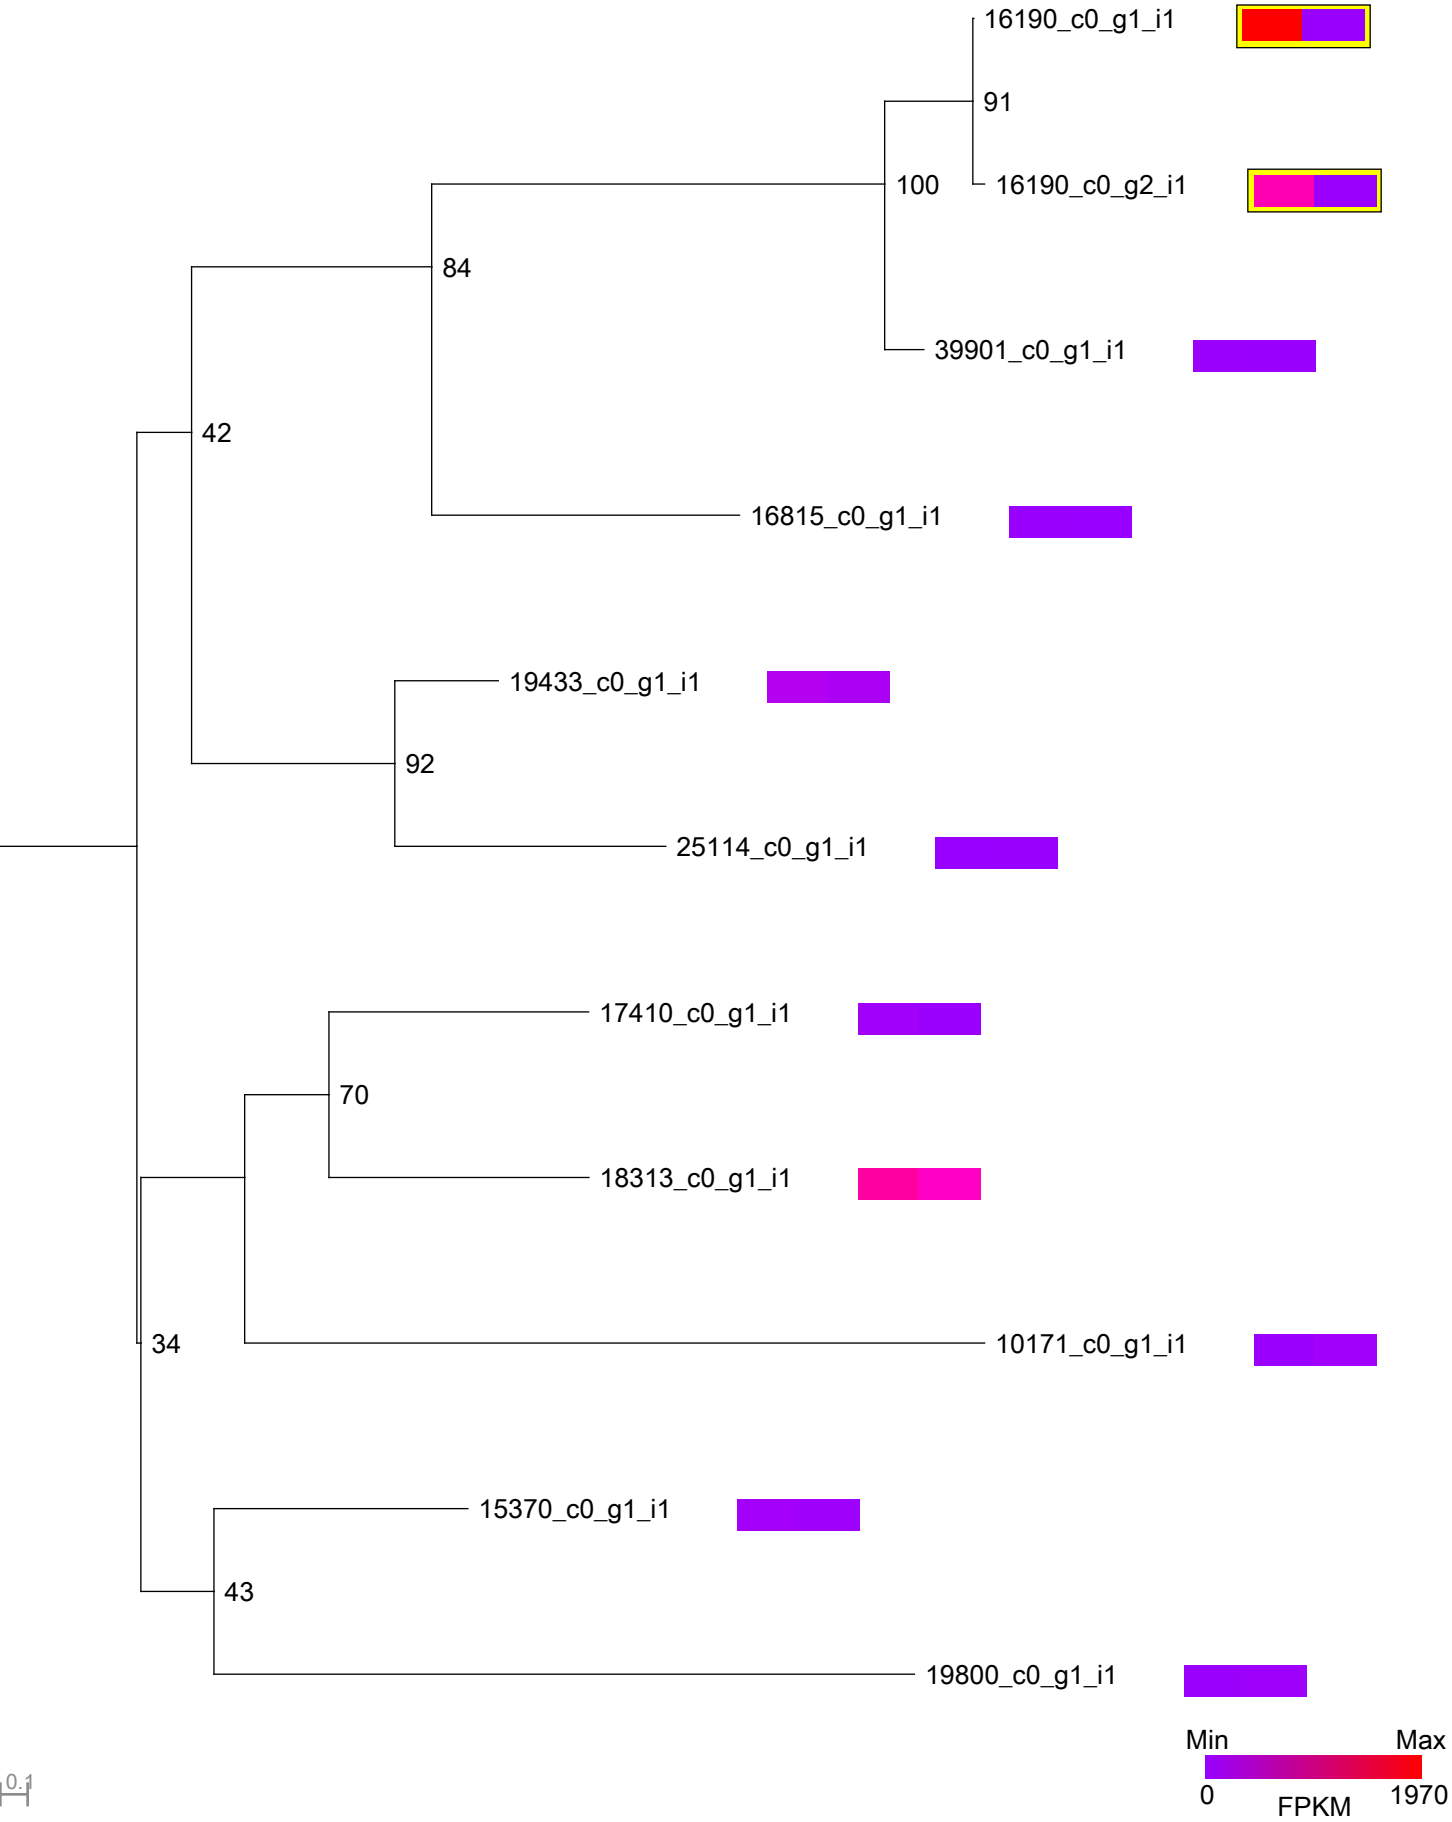

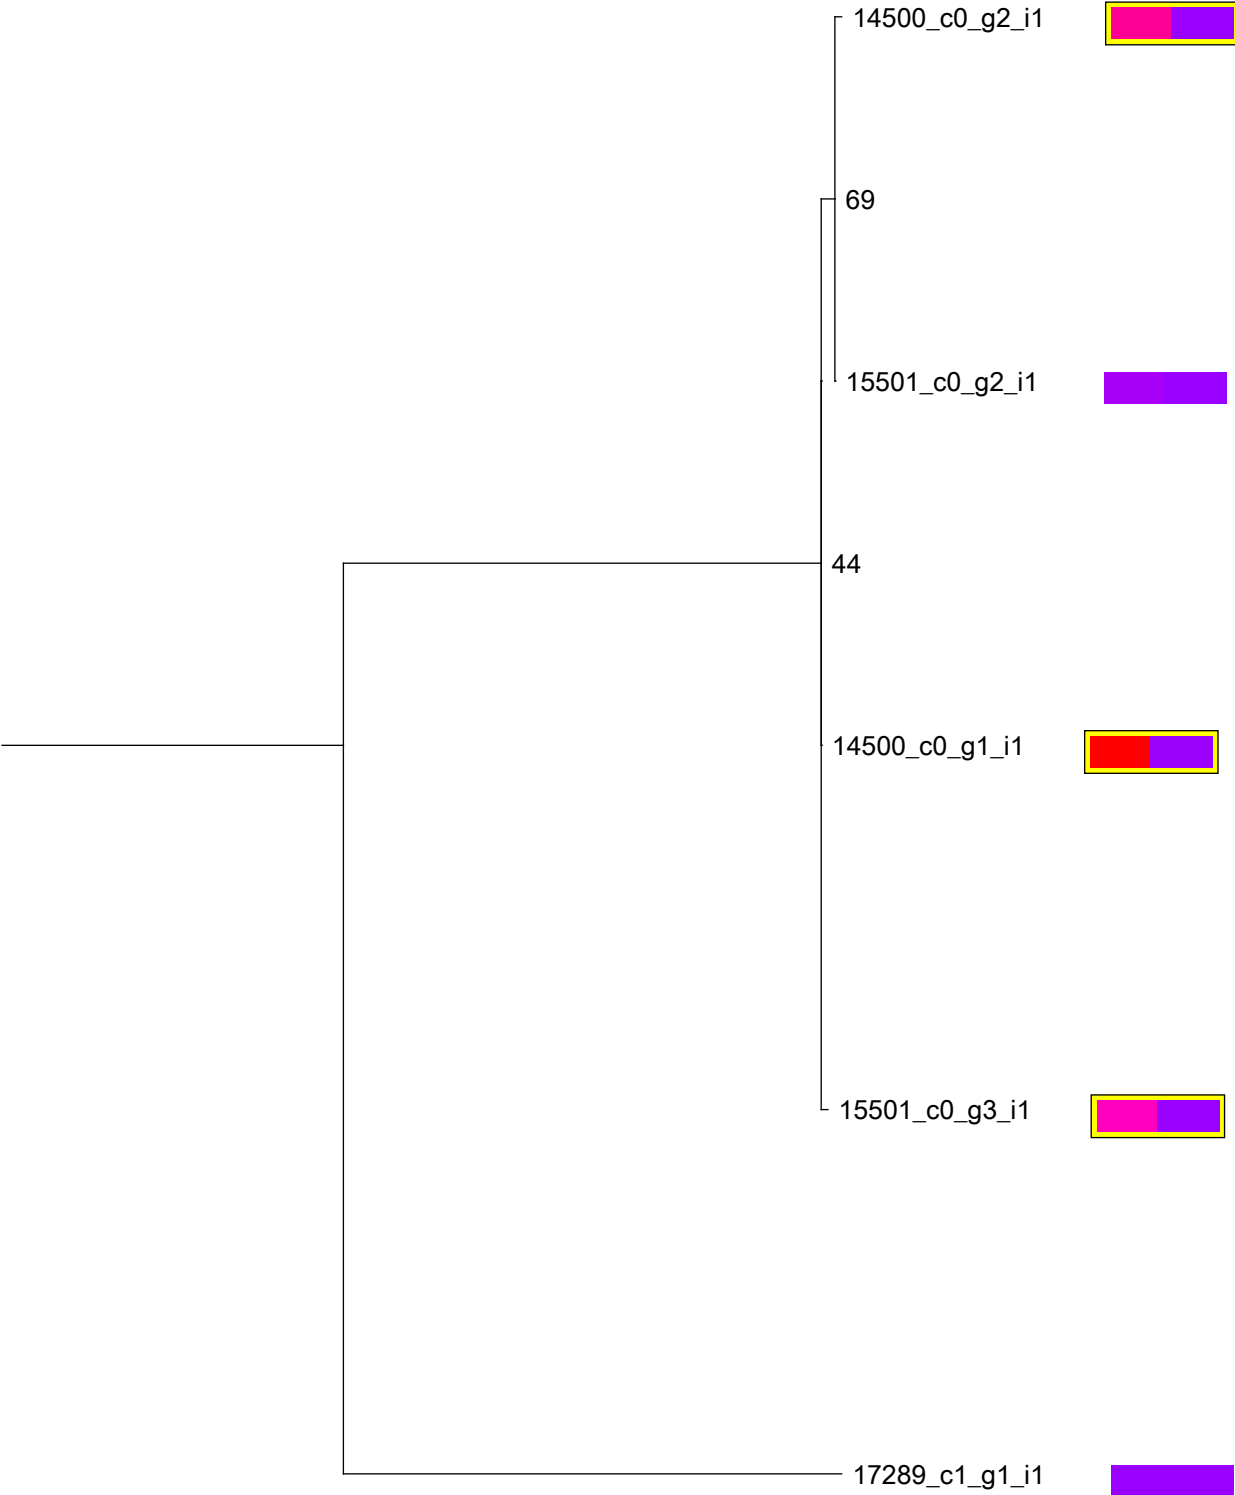

0.1

Min Max  
0 37386  
FPKM

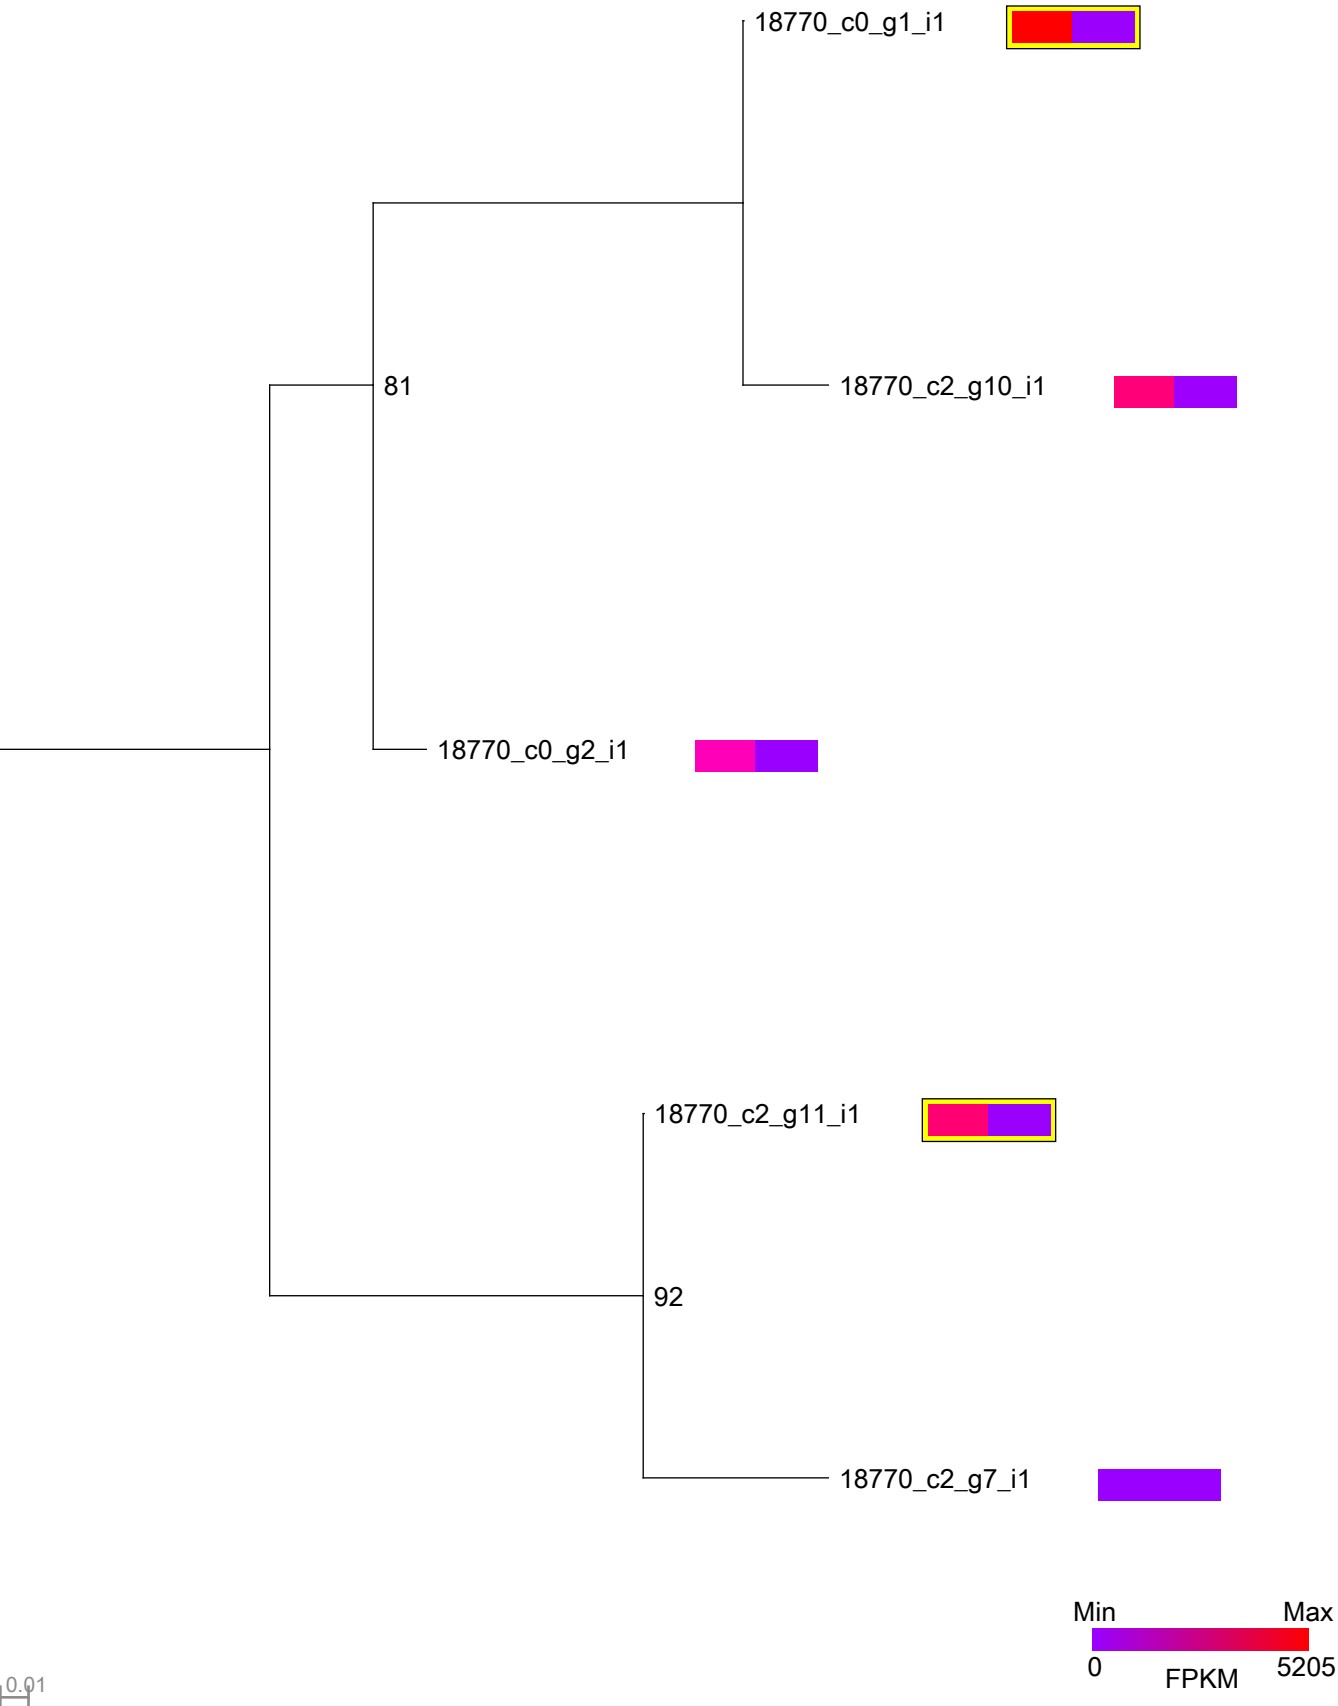

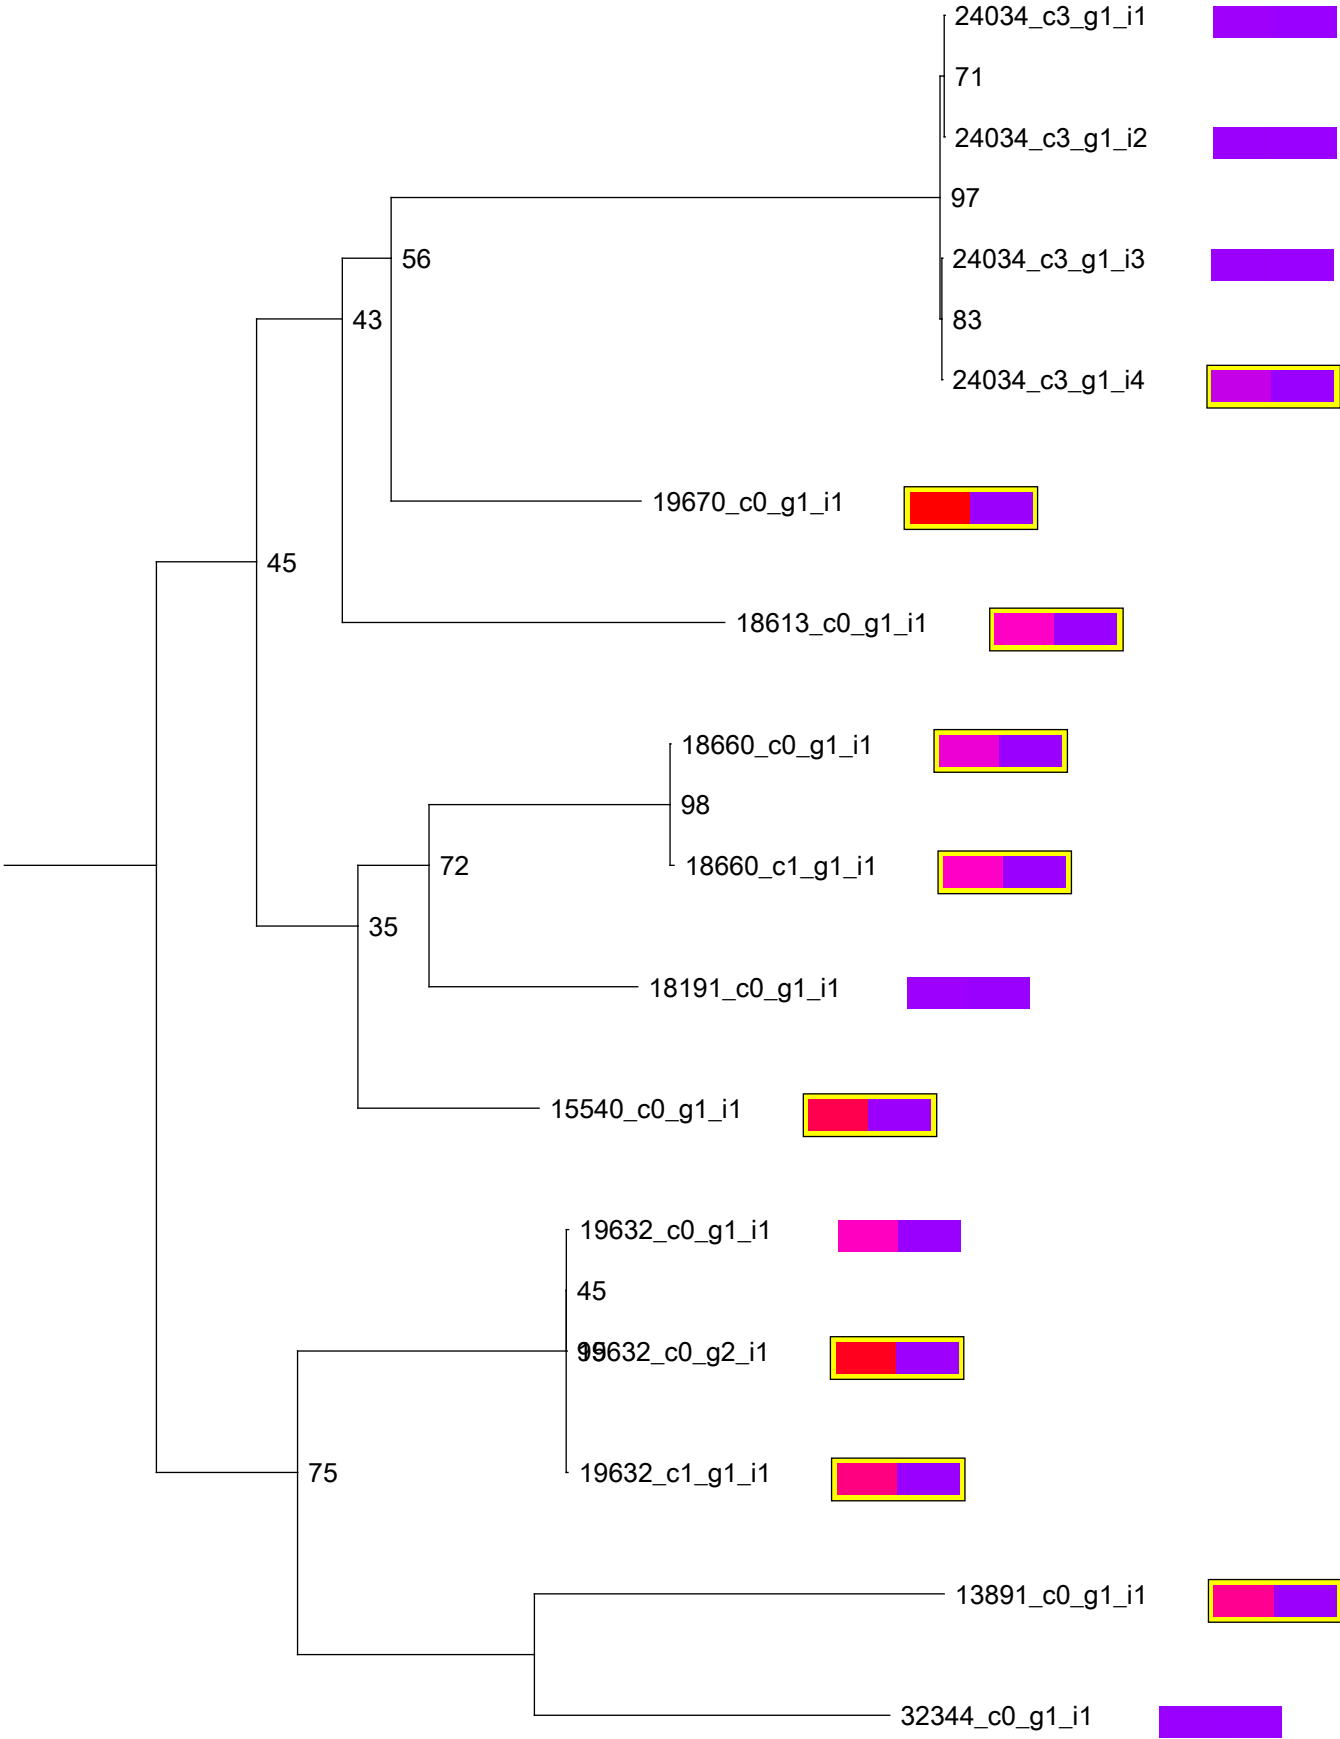

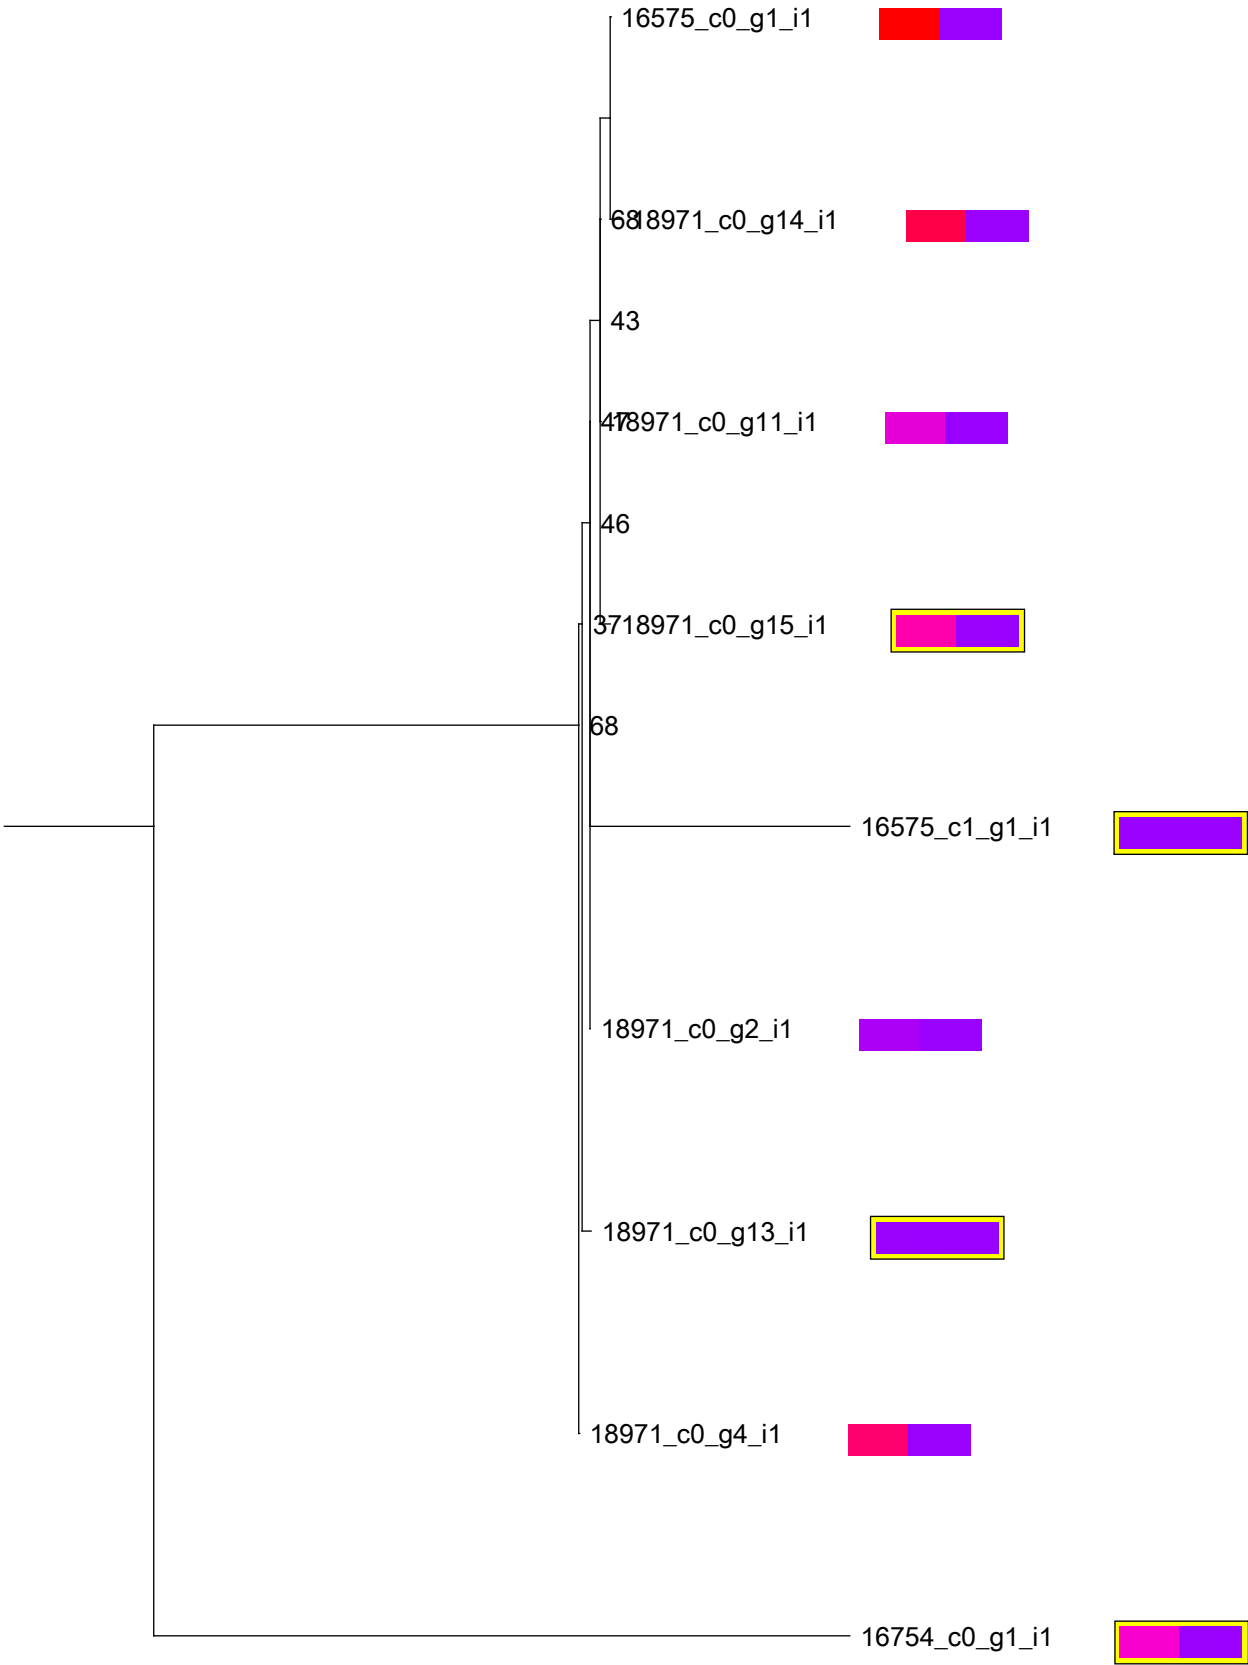



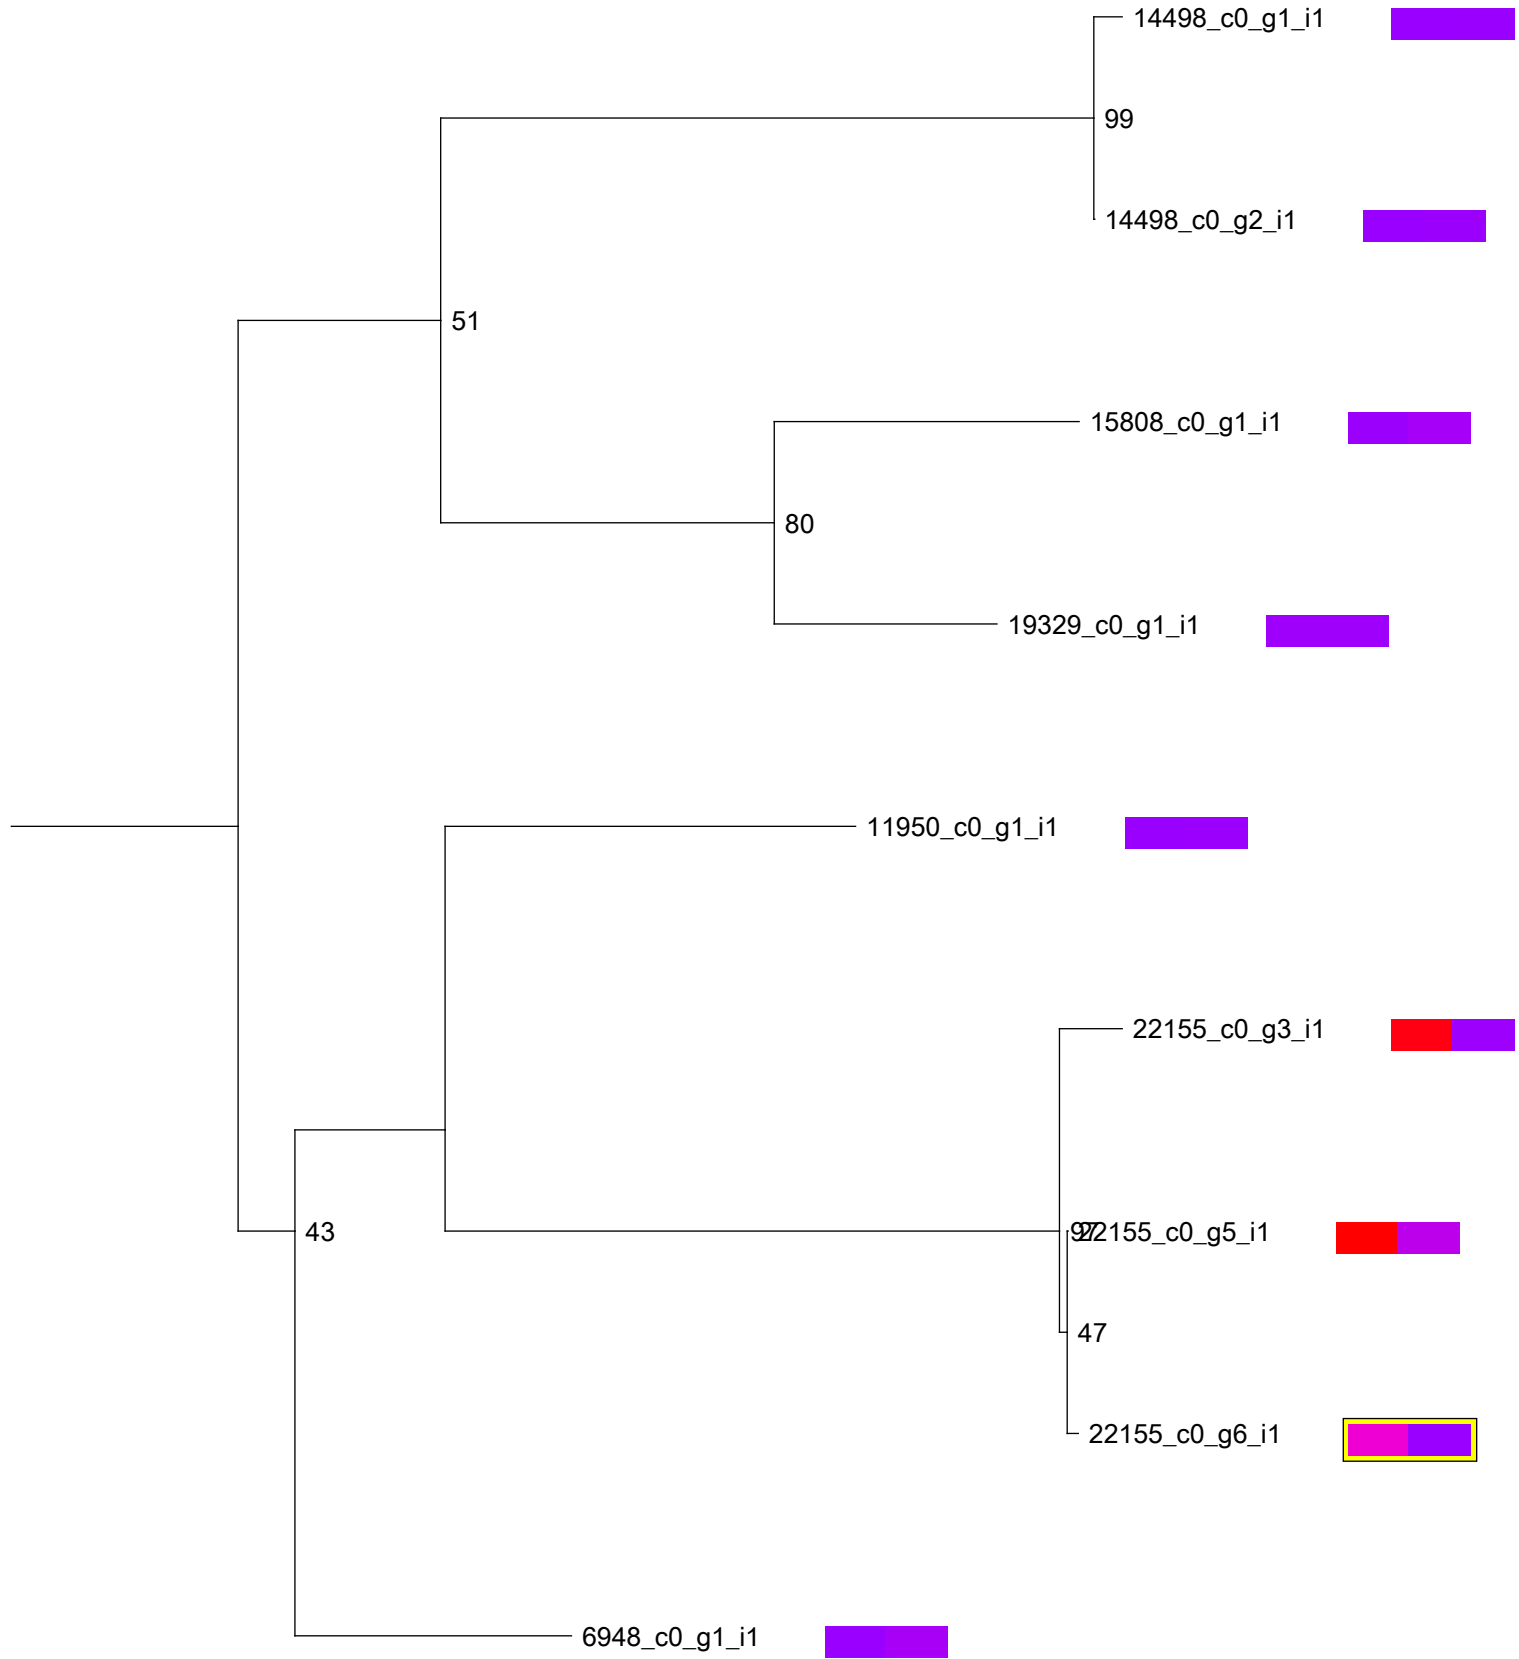

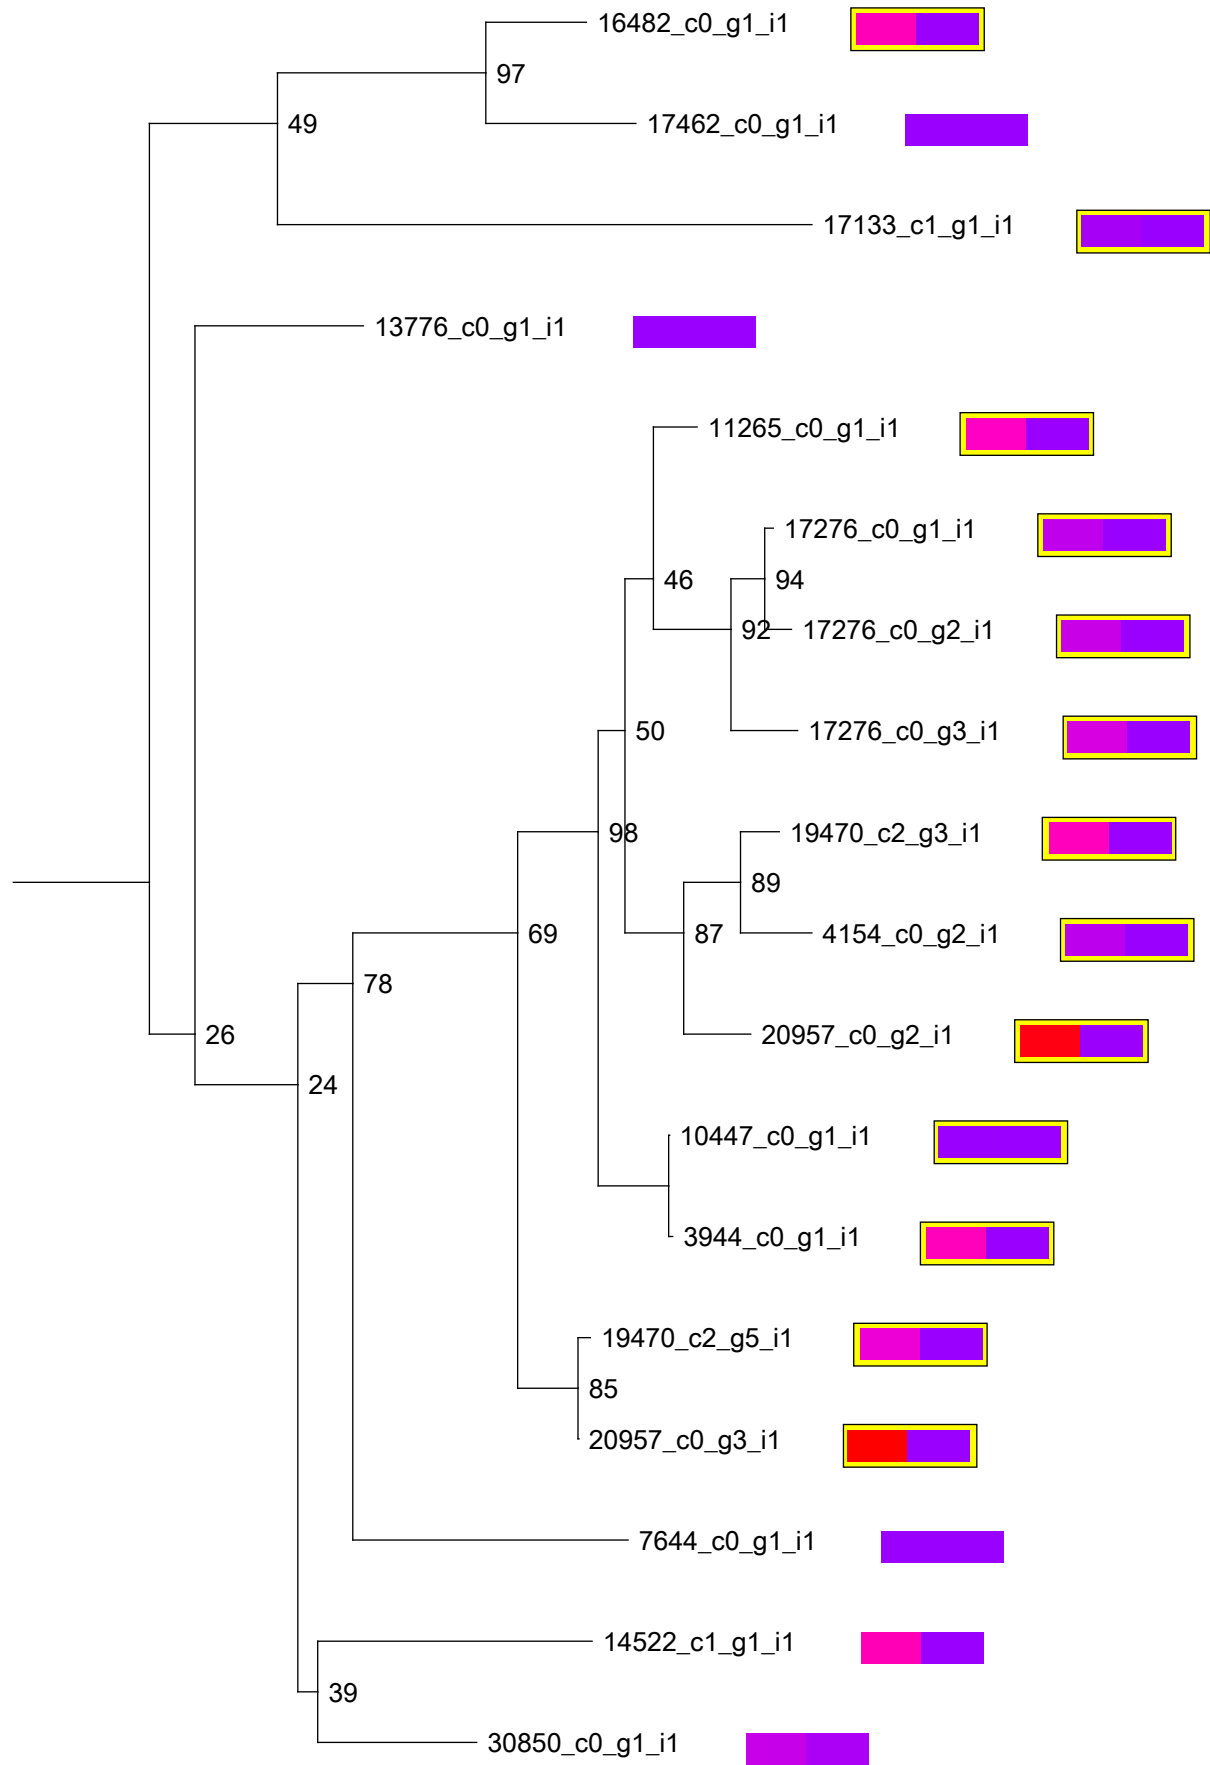

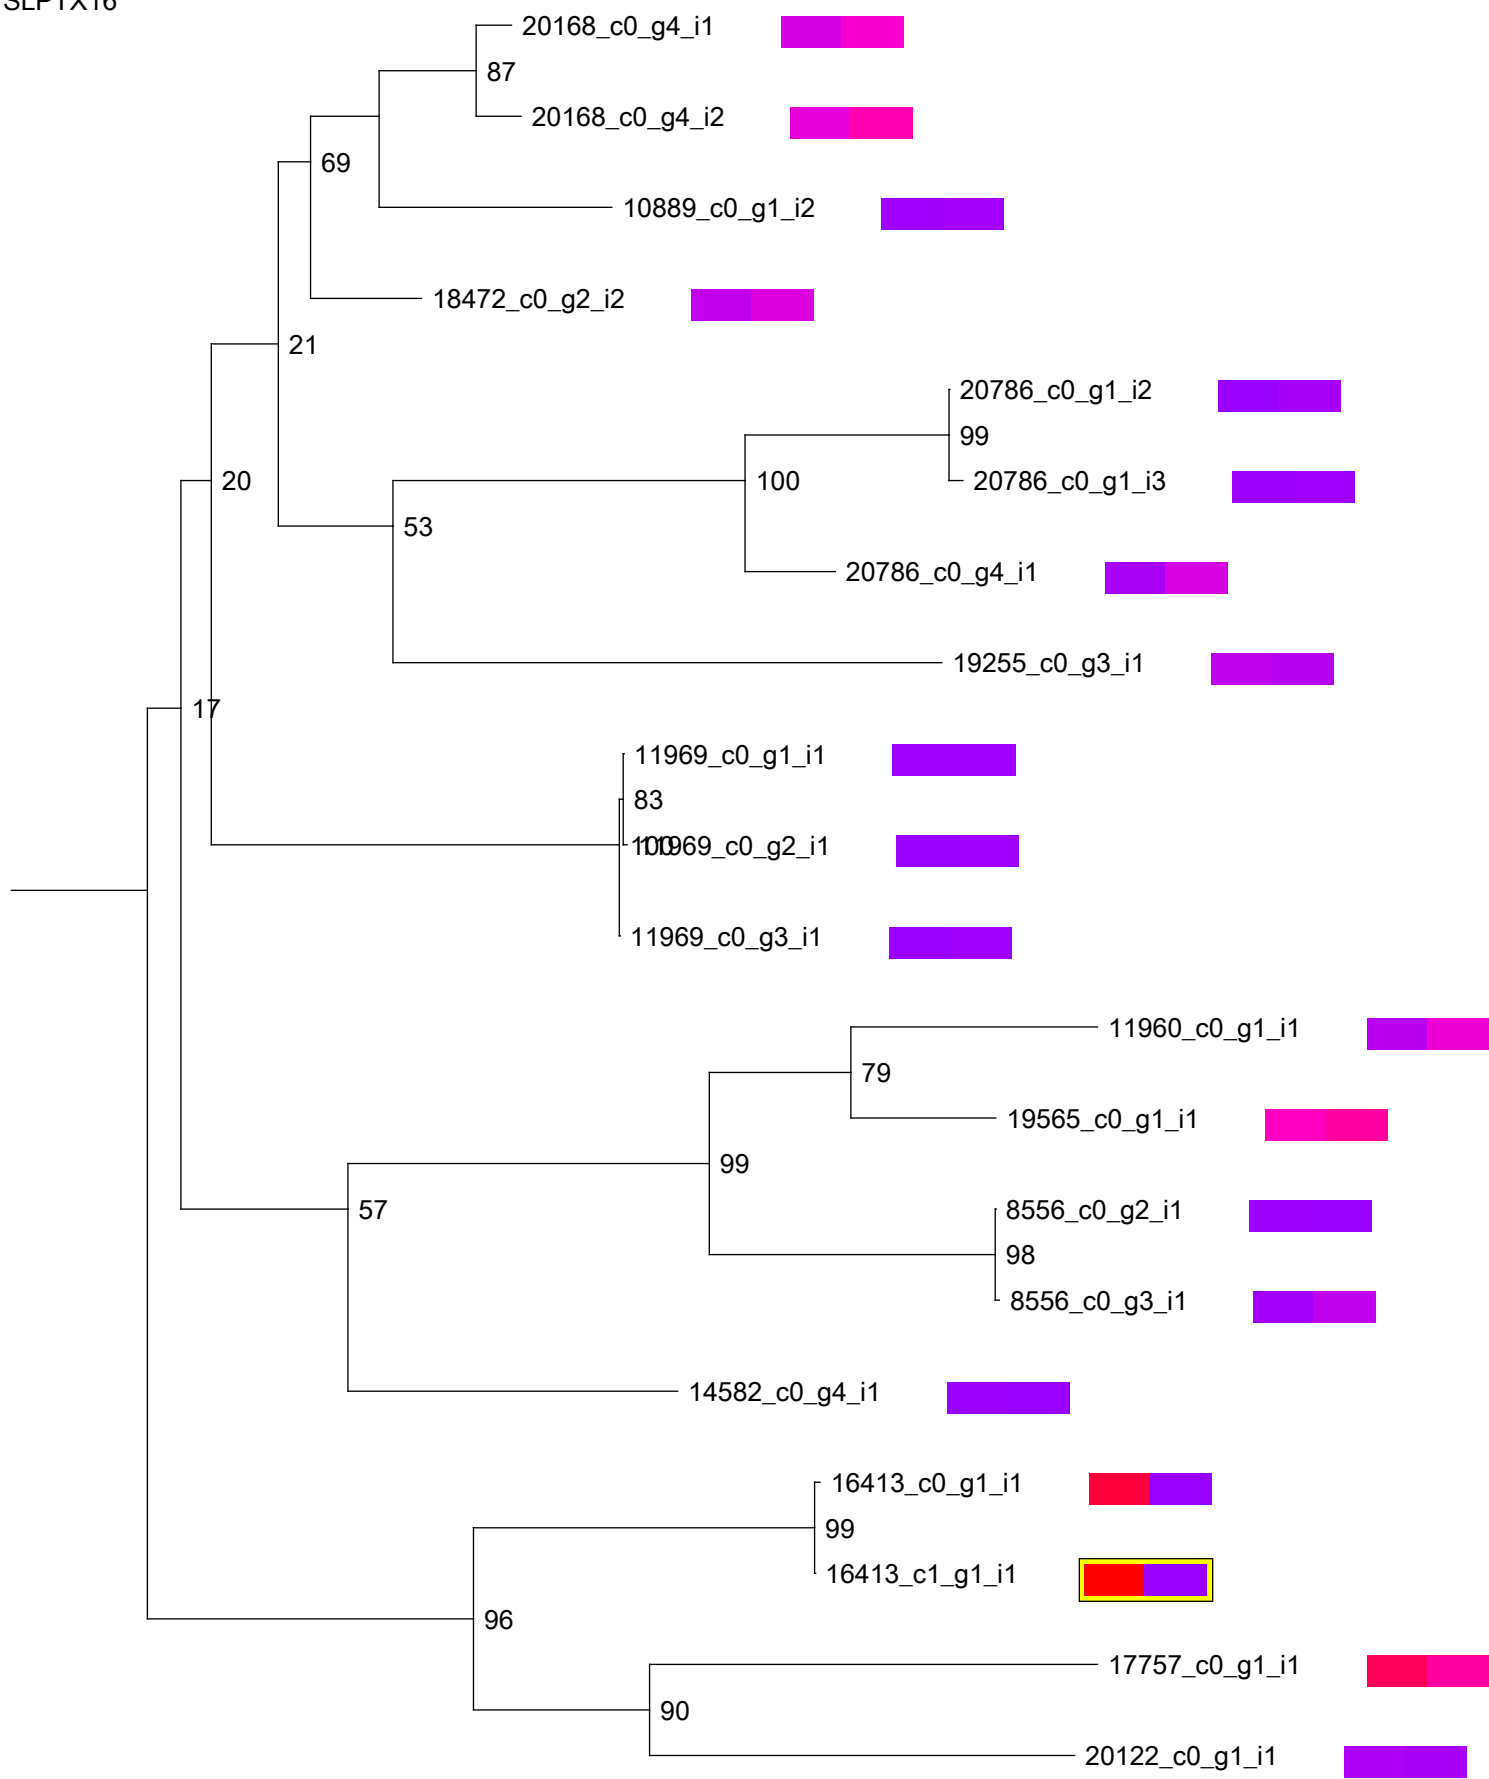

Transferrin

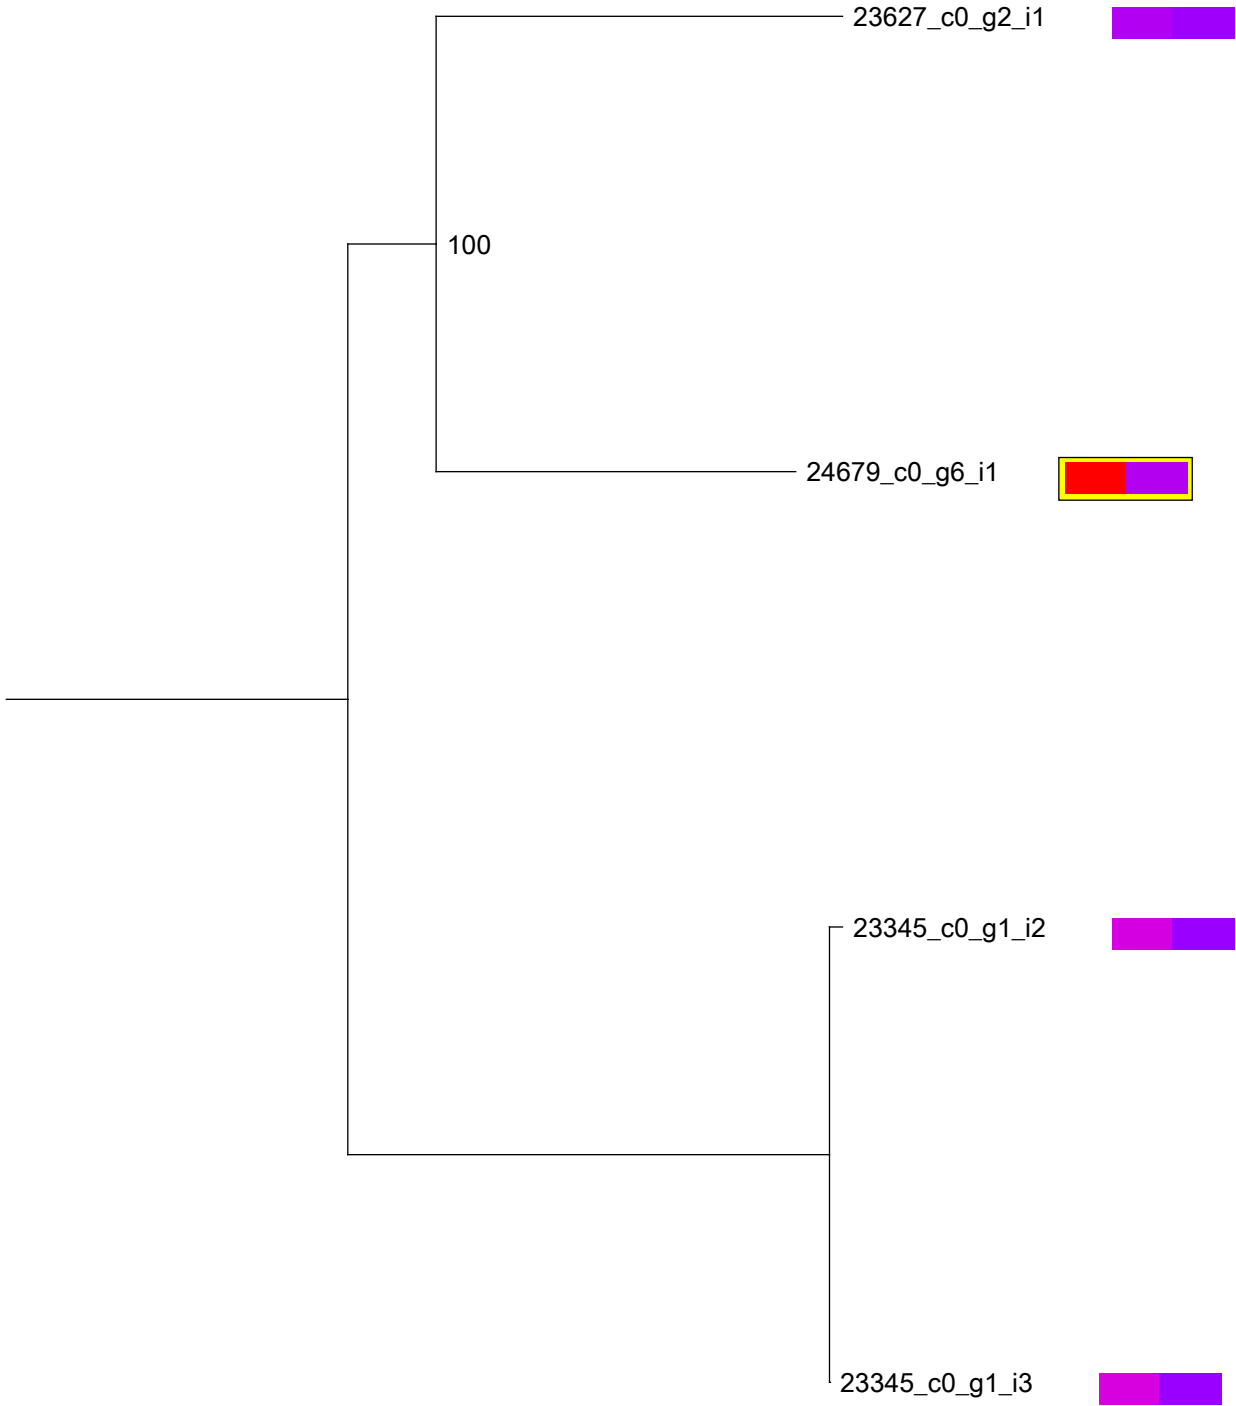

0.1

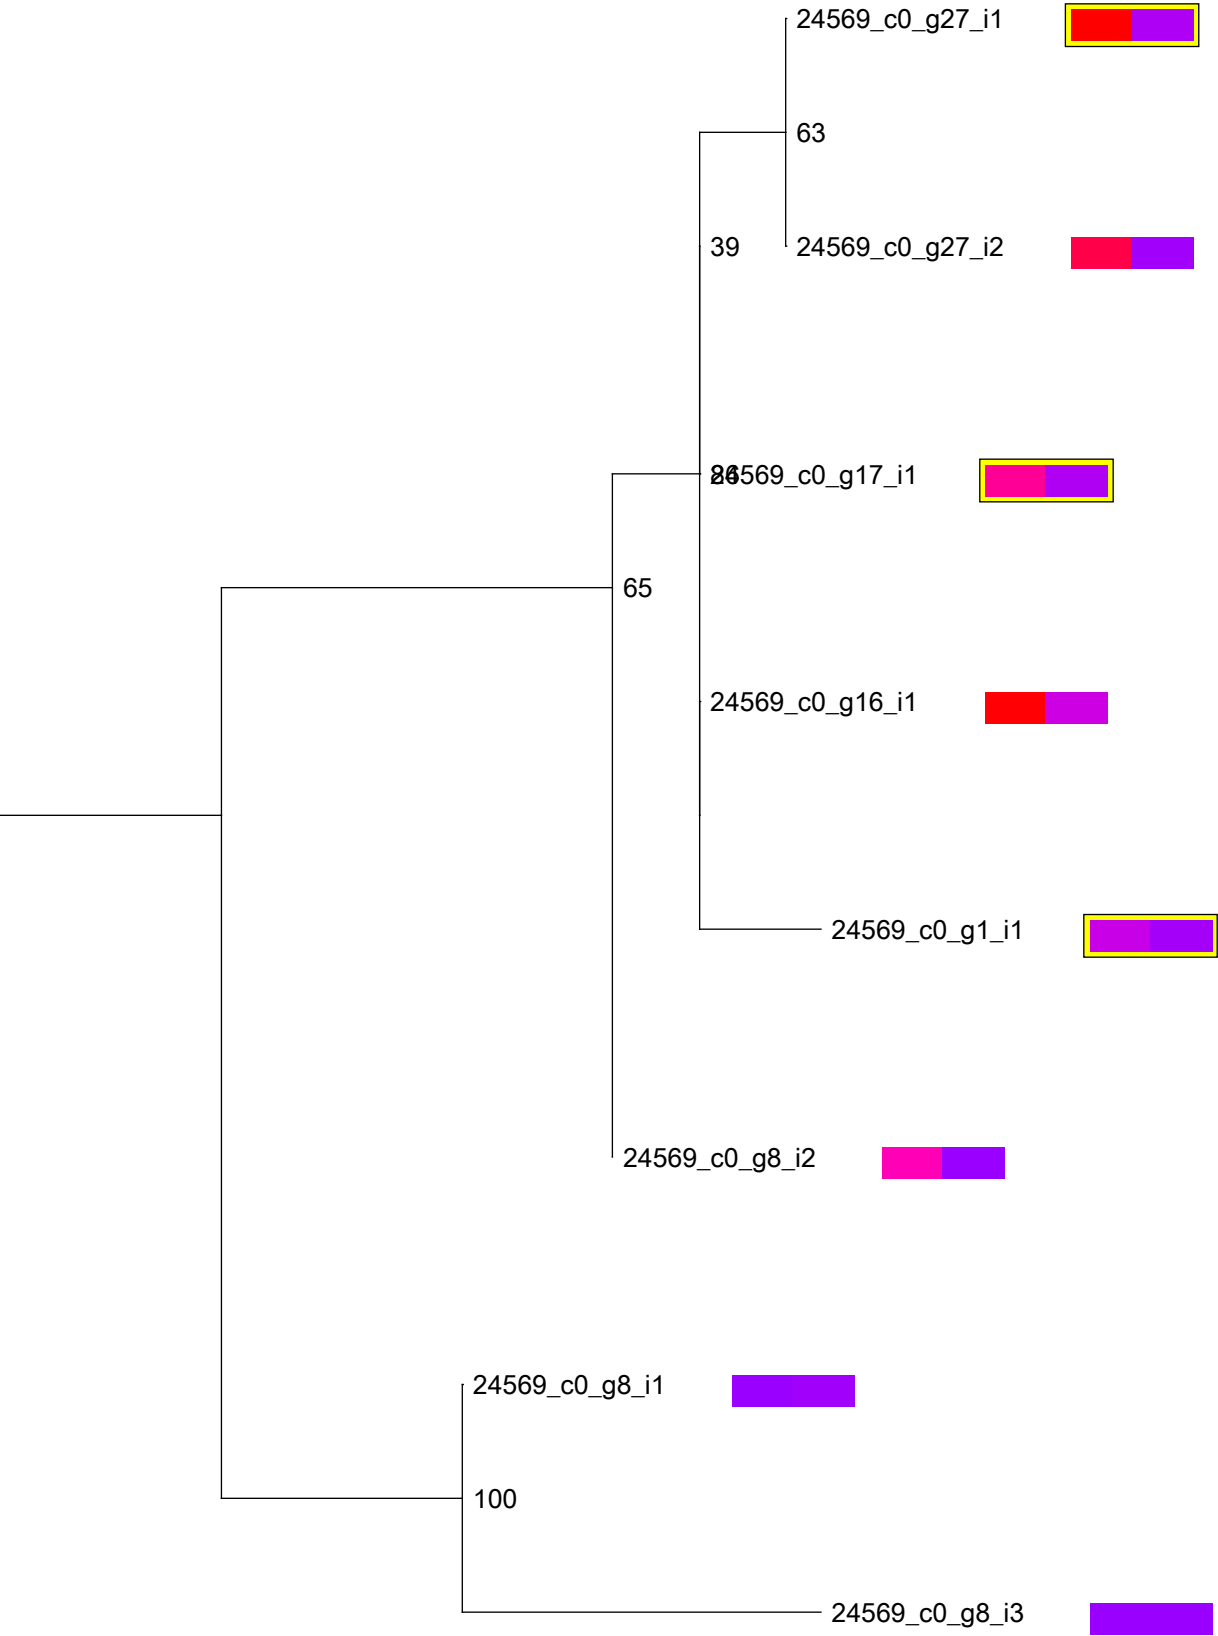

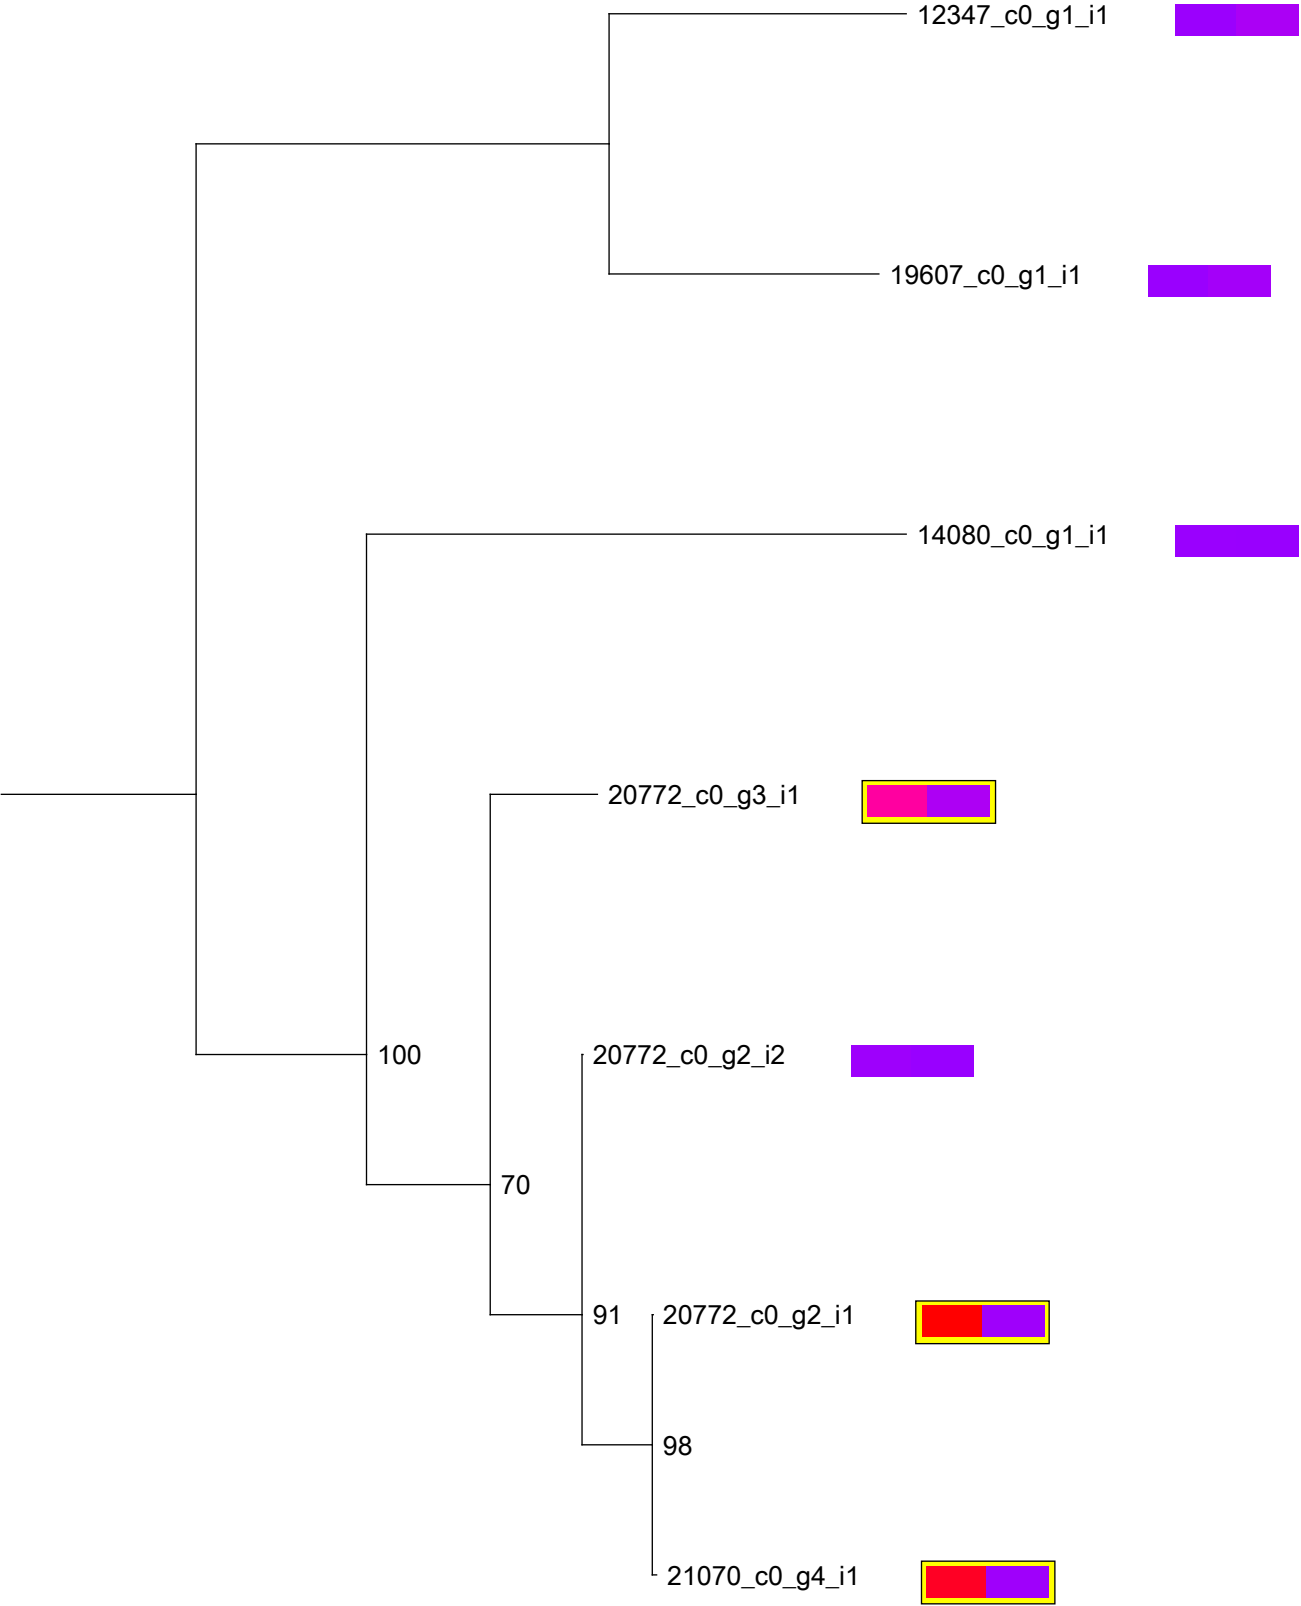

Supplement: s1 [file s1]
